# 1 Enhancer Reprogramming in Melanoma Immune Checkpoint Therapy Resistance

2 Mayinuer Maitituoheti<sup>1,2,14</sup>, Alvin Shi<sup>3,12,14</sup>, Ming Tang<sup>1,13,14</sup>, Li-Lun Ho<sup>3</sup>, Christopher Terranova<sup>1</sup>,  
3 Kyriaki Galani<sup>3</sup>, Emily Z. Keung<sup>4</sup>, Caitlin A. Creasy<sup>5</sup>, Manrong Wu<sup>1</sup>, Jiajia Chen<sup>6</sup>, Nana Chen<sup>7</sup>,  
4 Anand K. Singh<sup>1</sup>, Apoorvi Chaudhri<sup>1,5</sup>, Nazanin E. Anvar<sup>1</sup>, Giuseppe Tarantino<sup>6</sup>, Jiekun Yang<sup>3</sup>,  
5 Sharmistha Sarkar<sup>1</sup>, Shan Jiang<sup>1</sup>, Jared Malke<sup>4</sup>, Lauren Haydu<sup>5</sup>, Elizabeth Burton<sup>5</sup>, Michael A.  
6 Davies<sup>5</sup>, Jeffrey E. Gershenwald<sup>5</sup>, Patrick Hwu<sup>5,8</sup>, Alexander Lazar<sup>1,9</sup>, Jaime H. Cheah<sup>10</sup>, Christian  
7 K. Soule<sup>10</sup>, Stuart S. Levine<sup>10</sup>, Chantale Bernatchez<sup>5</sup>, Srinivas V. Saladi<sup>7</sup>, David Liu<sup>6</sup>, Jennifer  
8 Wargo<sup>1,4</sup>, Genevieve M. Boland<sup>11,\*</sup>, Manolis Kellis<sup>3,\*</sup> and Kunal Rai<sup>1,\*</sup>

9 <sup>1</sup>Department of Genomic Medicine, The University of Texas MD Anderson Cancer Center,  
10 Houston, TX; <sup>2</sup>Immunobiology and Transplant Science Center and Department of Surgery,  
11 Houston Methodist Hospital, Houston, TX. <sup>3</sup>Department of Computer Science, Massachusetts  
12 Institute of Technology, Boston, MA; <sup>4</sup>Department of Surgical Oncology, The University of Texas  
13 MD Anderson Cancer Center, Houston, TX; <sup>5</sup>Department of Melanoma Medical Oncology, The  
14 University of Texas MD Anderson Cancer Center, Houston, TX, USA; <sup>6</sup>Dana-Farber Cancer  
15 Institute, Harvard Medical School, Boston, MA; <sup>7</sup>Department of Otolaryngology Head and Neck  
16 Surgery, Massachusetts Eye and Ear Infirmary, Harvard Medical School, Broad Institute of  
17 Harvard and MIT; <sup>8</sup>Department of Cutaneous Oncology, Moffitt Cancer Center, Tampa, FL;  
18 <sup>9</sup>Department of Translational Molecular Pathology, The University of Texas MD Anderson Cancer  
19 Center, Houston, TX. <sup>10</sup>Koch Institute for Integrative Cancer Research at MIT, Cambridge, MA;  
20 <sup>11</sup>Department of Surgery, Massachusetts General Hospital, Boston, MA; <sup>12</sup>Current affiliation:  
21 GRAIL, LLC. Menlo Park, CA. <sup>13</sup> Current affiliation: Immunitas, Boston, MA. <sup>14</sup> These authors  
22 contributed equally.

23

24 \*Co-corresponding authors: Kunal Rai ([krai@mdanderson.org](mailto:krai@mdanderson.org))

25 Manolis Kellis ([manoli@mit.edu](mailto:manoli@mit.edu))

26 Genevieve Boland ([gmboland@mgh.harvard.edu](mailto:gmboland@mgh.harvard.edu))

27

28

29 **Key words:** epigenomics; enhancer reprogramming; melanoma; immunotherapy; bromodomain  
30 inhibitors

31 **Conflict of interest statement:** Authors declare no competing interests.

32

## ABSTRACT

33 Immune checkpoint blockade (ICB) therapy has improved long-term survival for patients  
34 with advanced melanoma. However, there is critical need to identify potential biomarkers of  
35 response and actionable strategies to improve response rates. Through generation and analysis  
36 of 148 chromatin modification maps for 36 melanoma samples from patients treated with anti-PD-  
37 1, we identified significant enrichment of active enhancer states in non-responders at baseline.  
38 Analysis of an independent cohort of 20 samples identified a set of 437 enhancers that predicted  
39 response to anti-PD-1 therapy (Area Under the Curve of 0.8417). The activated non-responder  
40 enhancers marked a group of key regulators of several pathways in melanoma cells (including c-  
41 MET, TGF $\beta$ , EMT and AKT) that are known to mediate resistance to ICB therapy and several  
42 checkpoint receptors in T cells. Epigenetic editing experiments implicated involvement of c-MET  
43 enhancers in the modulation of immune response. Finally, inhibition of enhancers and repression  
44 of these pathways using bromodomain inhibitors along with anti-PD-1 therapy significantly  
45 decreased melanoma tumor burden and increased T-cell infiltration. Together, these findings  
46 identify a potential enhancer-based biomarker of resistance to anti-PD-1 and suggest enhancer  
47 blockade in combination with ICB as a potential strategy to improve responses.

48

## INTRODUCTION

49 In recent years, there has been tremendous progress in melanoma immunotherapy,  
50 including the FDA approval of anti-CTLA-4 antibodies (in 2011) and anti-PD-1 antibodies (in  
51 2014). Though response rates for monotherapy with these agents are modest (~15% for anti-  
52 CTLA-4 and ~44% for anti-PD-1), a subset of responses are often durable (Brahmer et al., 2012;  
53 Hodi et al., 2010; Schadendorf et al., 2013; Topalian et al., 2012), with 2-year survival rates up to  
54 43% among patients who receive anti-PD-1 monotherapy and a 10-year survival rate of ~20% for  
55 those who receive anti-CTLA-4 monotherapy (Topalian et al., 2012; Topalian et al., 2014).  
56 Response rates are also significantly increased by combination anti-PD-1/anti-CTLA-4 therapy  
57 (Postow et al., 2015). However, a significant proportion of patients still do not achieve clinical  
58 response, and exhibit severe toxicity (Postow et al., 2015). Therefore, there is a critical unmet  
59 need to identify biomarkers that predict response or resistance to immune checkpoint blockade  
60 (ICB)—either as monotherapy or in combination—and to identify actionable strategies that will  
61 enhance the effectiveness of these potent therapies in the patients most likely to benefit.

62 The epigenome consists of an array of chromatin modifications, including DNA  
63 methylation and histone marks, which collectively form a dynamic state that is referred to as a  
64 “chromatin state”. The nature of chromatin states and their impact on associated genomic loci are  
65 determined by their constituent histone or DNA modification marks (Lee and Young, 2013). For  
66 example, the presence of the H3K27me3 mark (trimethylation of lysine 27 on histone H3) in  
67 promoters is associated with transcriptional repression, whereas H3K4me3 (trimethylation of  
68 lysine 4) is associated with transcriptionally active promoters. H3K4me1-modified and H3K27Ac-  
69 modified nucleosomes are present only at enhancer elements, whereas the presence of  
70 H3K79me2 or H3K36me3 coincides with transcribed regions (Barski et al., 2007). Thus, profiles  
71 of histone modification marks generate a comprehensive map of the epigenome.

72 Recent data indicate that responsiveness to ICB therapy may be associated with specific  
73 epigenetic processes. For example, regulation of histone modifications by HDAC, EZH2, or

74 KMT2D has been proposed to modulate either response to these agents or antitumor activity of  
75 immune cells (Maitituoheti et al., 2020; Peng et al., 2015; Wang et al., 2020; Woods et al., 2015).  
76 However, there is insufficient understanding of the epigenome content of ICB-sensitive and ICB-  
77 resistant cases. Furthermore, whether specific patterns of chromatin modification states are  
78 associated with response to ICB has not been systematically investigated. As chromatin  
79 modification states are stable and heritable, specific patterns of chromatin modification states can  
80 potentially be used as biomarkers for ICB response (Mulero-Navarro and Esteller, 2008).

81 By generating epigenome profiles of 36 melanoma samples treated with ICB at MD  
82 Anderson Cancer Center (MDACC), followed by validation in an independent cohort of 20  
83 melanoma samples treated with ICB at Massachusetts General Hospital (MGH), we demonstrate  
84 that an enhancer signature of 437 genomic loci in pre-treatment samples can predict non-  
85 response of melanoma to ICB. Enhancer gains in non-responders were observed on a number of  
86 resistance-driving genes, and enhancer-blocking bromodomain inhibitors synergized with anti-  
87 PD-1 antibodies in pre-clinical models. Altogether, we identify enhancer gains as an important  
88 epigenetic mechanism driving resistance to anti-PD-1 therapy in melanoma, which could be  
89 leveraged for biomarker development or novel therapeutic combinations.

## 90 **RESULTS**

91 To directly address whether epigenomic changes are associated with response to ICB  
92 therapy, we mapped chromatin state patterns in 36 metastatic melanoma samples from patients  
93 treated with nivolumab or pembrolizumab (anti-PD-1 antibodies) at MDACC (**Fig. 1A** and **Table**  
94 **S1**). Response in these patients was documented using RECIST criteria, which identified 4  
95 samples from patients who achieved complete response, 4 with partial response, 5 with stable  
96 disease, and 23 with progressive disease in response to ICB therapy (**Fig. S1A-S1B**). Overall, 13  
97 samples from patients with complete or partial response or stable disease were annotated as  
98 “responders (R)” and the 23 samples from patients with progressive disease were labeled as

99 “non-responders (NR)” (**Fig. S1A-S1B**). Samples were collected at 3 timepoints: 1) pre-treatment  
100 (n = 17), 2) on-treatment ( n = 4), and 3) post-treatment (n = 15).

101 To identify chromatin state patterns, we profiled 6 reference histone modifications that  
102 mark promoter (H3K4me3), enhancer (H3K4me1 and H3K27Ac), transcribed (H3K79me2), and  
103 repressed (H3K27me3 and H3K9me3) states using high-throughput ChIP-sequencing  
104 methodology (Garber et al., 2012; Rai et al., 2015) in all 36 samples, generating 148 chromatin  
105 maps (**Fig. S1C**). This approach is similar to that utilized by ENCODE (Consortium et al., 2012)  
106 and NIH Roadmap projects (Bernstein et al., 2010) to determine basic epigenome maps in normal  
107 tissues and cell lines. As histone modifications exert their function in a combinatorial fashion, we  
108 identified such chromatin states using the ChromHMM algorithm (Ernst and Kellis, 2012). A model  
109 of 15 chromatin states was chosen for more in-depth interrogation into the biology of chromatin  
110 in anti-PD-1 response, as it presented sufficient resolution for biological interpretation (**Fig. 1B**  
111 **and Fig. S1D**). Annotation of these states based on the content of histone marks and their  
112 genomic locations revealed the presence of active promoter (E1, E2, E3), active enhancer (E6,  
113 E7), transcribed (E4, E5), polycomb-enriched (E11), heterochromatin/bivalent (E9), poised (E8,  
114 E10), and low (E12, E13, E14; merged as E12 afterwards) states (**Fig. 1B**).

115

## 116 **Chromatin state transitions between sensitive and resistant lesions**

117 We first identified chromatin state differences between pre-treatment samples belonging  
118 to the responsive (R) and non-responsive (NR) groups. To this end, we consolidated chromatin  
119 states using epilogos (see **Methods**) and computed transitions in these states between the  
120 responder and non-responder samples (**Fig. 1C**). The most notable transition was from the active  
121 enhancer state E7 in non-responder samples to low (E12), polycomb (E11), or repressed (E10)  
122 states in responders, based on the number of switching bins in the responder and non-responder  
123 groups (**Fig. 1D**). We identified 31,555 bins (1-kb segments) that showed transitions between  
124 active enhancer state E7 in non-responsive samples to low, repressive states E10, E11, and E12

125 in responsive samples (**Fig. 1D**). These differences in active enhancer states showed significant,  
126 yet modest, changes in corresponding gene expression (**Fig. S1E**). Observed differences in  
127 active enhancer chromatin state signals on these loci were also recapitulated when only H3K27ac  
128 signals were examined. H3K27ac signal was decreased in 24,862 peaks corresponding to 21,924  
129 bins with active enhancer states in pre-treatment samples from the responders compared to those  
130 from the non-responders (**Figs. 1E, S1F**). Average intensity of H3K27ac on these enhancers also  
131 showed a drastic increase in the non-responders compared to the responders, whereas the  
132 average intensity for H3K27me3 occupancy on these enhancers was significantly increased (**Fig.**  
133 **S1G**). We also noted that loci harboring active enhancer (E7) state in pre-treatment R samples,  
134 but not in pre-treatment NR samples were enriched surrounding genes involved in T cell function  
135 suggesting higher lymphocyte infiltration in responder samples (**Figs. S1H**).

136

### 137 **An enhancer signature predicts response to anti-PD-1 therapy in melanoma**

138 To establish multiple independent lines of evidence supporting a concrete set of  
139 epigenomic correlates of ICB resistance, we collected an independent cohort of 22 melanoma  
140 samples from the MGH biobank and generated H3K27ac ChIP-seq data (**Fig. 1A and Table S1**).  
141 To make our MDACC and the MGH datasets jointly analyzable, we defined a common metric that  
142 could be used across both cohorts by using MAnorm (Shao et al., 2012) to calculate a log<sub>2</sub> ratio  
143 of read densities (M-value) between ChIP and a whole-cell extract control that was adjusted for  
144 the average log<sub>2</sub> read density at all peaks (**Figs. S2A-S2B**). This allows any 2 peak regions to be  
145 compared on the same scale between the two distinct cohorts by accounting for variable total  
146 read depth at peak regions of interest. Using IDR (Irreproducible Discovery Rate) analysis (see  
147 **Methods**), we identified a subset of 84,317 out of 244,472 peaks as reproducible between the  
148 MDACC and MGH cohorts (**Fig. 2A**). These peaks were enriched in various functional classes,  
149 including promoter, intron, and intergenic areas (**Fig. S2C**).

150           Next, we subjected the M-values of this subset of peaks to differential peak calling via  
151 *limma* (Ritchie et al., 2015) in each cohort independently. We identified 5174 MGH and 8291  
152 MDACC pre-treatment peaks whose activity was significantly ( $p < 0.05$ ) different between  
153 responders and non-responders (**Table S2**). To identify a replicated peak set, we intersected  
154 differentially enriched peaks within both the MDACC and MGH cohorts to determine whether this  
155 set exhibited statistically significant enrichment, above the null expectation. Only the pre-  
156 treatment comparisons exhibited a significant enrichment in the number of replicated peaks ( $p =$   
157  $<2.2e-16$ , one-sided exact binomial test), and 437 peaks were doubly significant in both the  
158 MDACC and MGH pre-treatment comparisons. We also noted excess enrichment in the signal  
159 from the MDACC cohorts in both the pre-treatment (**Fig. S2D**) and on-treatment (**Fig. S2E**)  
160 comparisons. We also generated RNA-seq data on 44 ICB-treated melanoma samples consisting  
161 of 26 pre-treatment (14 NR and 12 R), 10 on-treatment (6 NR and 4 R) and 8 post-treatment (6  
162 NR and 2 R) samples from both MDACC and MGH cohorts. Here we noted 588 differentially  
163 expressed genes (DEGs) between NR and R at pre-treatment stage (**Table S2**).

164           Next, to identify a subset of enhancers with predictive ability for patient response, we  
165 concentrated on the pre-treatment significant H3K27ac peak set overlapping between the  
166 MDACC and MGH cohorts. We utilized the 437 replicated peaks as a feature set in a cross-  
167 validation setting and trained 2 random forest models: one in which the MDACC cohort was  
168 designated as the training set and the MGH cohort the testing set, and vice versa. The results  
169 were combined into a single receiver operator characteristic (ROC) for evaluation. We also  
170 evaluated the area under the ROC curve (AUC) as a measure of model performance. Using the  
171 437 peaks, we were able to achieve an AUC of 0.9 (**Fig. S2F**). However, in this analysis, features  
172 were determined by the union of the two datasets making it prone to potential data leakage  
173 between the training and testing cohorts. To prevent this issue, we performed leave-one-out  
174 (LOO) cross validation (CV) on N=22 pre-treatment CHIP-seq samples and N=26 pre-treatment

175 RNA-seq across the two cohorts. To generate the features, within each cross-validation fold  
176 (N=21 ChIP-seq training samples, N=25 RNA-seq training samples), we repeated our replicated  
177 peak calling procedure by finding the overlapping peaks with nominal  $p < 0.05$  in both the MDACC  
178 and MGH cohorts for each CV fold. We tested a total of 23,4457 RNA-seq genes and 84,317  
179 ChIP-seq peaks. These features were then used to train a random forest classifier with K=5 to  
180 K=20 trees on the training set, and subsequently tested on the N=1 testing set to construct the  
181 ROC across the 22 ChIP-seq and 26 RNA-seq CV folds. We took the highest performing  
182 classifiers for the ChIP-seq and RNA-seq separately and reported their performance. We  
183 observed that epigenomic features are moderately predictive of immunotherapy response, with  
184 an AUC of 0.842 (**Fig. 2B**). On the other hand, RNA-seq features showed much less predictive  
185 ability (AUC = 0.579) when evaluated using the same feature discovery framework described  
186 above (**Fig. 2B**). This relationship holds when the aforementioned approach is applied only on  
187 the pre-treatment samples for which both RNA-seq and ChIP-seq data are available (**Fig. S2G**).  
188 Our enhancer based classifier also performed better than prior biomarkers based on RNA  
189 expression patterns, tumor mutation burden (TMB), or histopathological features (Auslander et  
190 al., 2018; Johannet et al., 2021; Shi et al., 2020; Yan et al., 2020) (**Fig. S2H**). We further examined  
191 TMB in MDACC cohort by generating and analyzing WGS data from 34 samples and in MGH  
192 cohort by analyzing WES data from 8 samples, but failed to observe significant difference in  
193 mutation burden between R and NR patients (**Fig. S2I**). We also utilized the TMB data from pre-  
194 treatment samples as a predictive feature for response in the MDACC cohort. In LOO-CV across  
195 N=13 MDACC samples with both H3K27ac and TMB data, we observed incorporating TMB data  
196 along with differential H3K27ac peaks (AUC=0.7143) as features to a random forest classifier  
197 with K=20 trees resulted in a slightly increased AUC compared to only using differential H3K27ac  
198 peaks alone (AUC=0.6905) (**Fig. S2J**).

199 We next assayed to what extent these 437 peaks stratified progression-free survival in our  
200 clinical cohort. To do so, we performed Cox proportional hazards regression with M-values as the



201 design matrix which showed that 32 out of the 437 peaks significantly stratified survival in both  
202 the MGH and MDACC cohorts. As a result of increased peak signal, 29 out of the 32 peaks offered  
203 worse prognosis (**Fig. 2C**), whereas 3 out of 32 peaks offered better prognosis (**Fig. S2K**). Our  
204 results show that a distinct set of epigenomic peaks are significantly associated with treatment  
205 response and survival stratification in 2 independent cohorts, making these peaks optimal targets  
206 for follow-up prognostic studies.

207

### 208 **Enhancer activation targets genes contributing to anti-PD-1 resistance**

209 Do these differential enhancers between non-responders and responders play functional  
210 role during evolution of ICB resistance? To address this question, we first sought to identify the  
211 gene targets of NR- or R-specific enhancers by overlapping them with the enhancer-promoter (E-  
212 P) annotation. As enhancers activate their target gene expression by looping onto the promoter,  
213 the E-P annotation was predicted using in-house H3K27ac HiChIP data from one of the short-  
214 term melanoma culture (STC2765 which is derived from anti-PD-1 non-responder melanoma  
215 tumor) and from a prior study using 935 samples, covering a major fraction of human cell and  
216 tissue types (ENCODE + Roadmap or FANTOM5)(Cao et al., 2017) (see **Methods**). This  
217 identified 1318 gene targets of 966 reproducibly enriched enhancers (false discovery rate [FDR]  
218 < 0.1) in non-responsive samples (**Table S2**). To dissect whether enhancer peaks were derived  
219 from melanoma cells or tumor-infiltrating T cells (TILs), we overlapped the replicated enhancer  
220 peaks (562 NR-specific and 161 R-specific) with in-house H3K27ac ChIP-seq data on short-term  
221 melanoma cultures (STCs) from 10 patients (Terranova et al., 2021) and cognate TILs derived  
222 from 8 of them (**Fig. 3A and Table S3**). Pathway analysis of target genes of melanoma tumor cell  
223 enriched NR-specific enhancers showed MAPK pathway, Epithelial-to-Mesenchymal transitions  
224 (EMT), TGF $\beta$  pathway among others (**Fig. 3A**), some of which have been previously implicated  
225 in immune evasion and immunotherapy resistance (Mariathasan et al., 2018; Terry et al., 2017).

226 These genes included known regulators of anti-tumor immune response such as NOTCH1, AKT1,  
227 TGF $\beta$ 2, USP22, MYC, MITF, c-MET (**Fig. S3A**)(Batlle and Massague, 2019; Casey et al., 2016;  
228 Li et al., 2020; Meurette and Mehlen, 2018; Papaccio et al., 2018; Rogel et al., 2017; Wiedemann  
229 et al., 2019). Motif enrichment analysis (HOMER) provided insight into TFs that are known (such  
230 as NUR77, STAT4, IRF1) or unknown (such as ZNF189, ESSRB, BCL6, TBX20, SMAD4) to  
231 contribute to immune evasion or ICB resistance within the melanoma or TILs (**Fig. 3B**). Recent  
232 study of whole-exome and transcriptome meta-analysis of over 1,000 patients treated with ICB  
233 revealed that CXCL9/CXCL13 are the strongest predictors of response (Litchfield et al., 2021),  
234 consistently we also noted enhancer enrichment nearby these two genes in responder tumors  
235 (**Fig. S3B**). In NR samples, we also detected enhancer gains on TGF $\beta$ , PI3K-AKT and  
236 angiogenesis pathway genes that are known to cause systemic immunosuppression (**Figs. S3C-**  
237 **S3E**)(Fukumura et al., 2018). Finally, we identified other potentially novel regulators of anti-tumor  
238 immune response such as FAM20C, RFPL2, MAMDC2, SPATA2 in melanoma cells (**Figs. 3C,**  
239 **S3F-S3G and Table S3**) (Lee et al., 2020; Schlicher et al., 2016; Xu et al., 2021). Integration of  
240 enhancer gains with gene expression data showed concomitant upregulation of gene expression  
241 of a subset of enhancer-target genes at the pre-treatment stage (**Figs. 3D, S3I**).

242 Target genes of TILs-enriched enhancers (from 437 replicated H3K27ac peaks) were  
243 enriched in allogenic transplant, interferon signaling and other pathways which are known to play  
244 important roles in T cell differentiation and anti-tumor activity (**Fig. 3A**). Overlap of enhancers  
245 enriched in NR pre- or post-treatment tumors with those in isolated TILs identified genes in  
246 multiple categories: 1) known inhibitors of T cell activity such as CISH (Palmer et al., 2015); 2)  
247 important inhibitory checkpoint receptors, such as LAG-3 (Joller and Kuchroo, 2017) and BTLA  
248 (Watanabe et al., 2003), or their key partners, such as CD48 and CEACAM-1 (required for  
249 function of TIM-3 (Huang et al., 2015)); 3) genes known to mediate key interactions with antigen-  
250 presenting cells or tumor cells CD244 and HVEM (Wherry and Kurachi, 2015); 4) transcription  
251 factors mediating T-cell exhaustion such as NR4A1(Chen et al., 2019)(**Figs. 3E, S4A-S4C**); 5)

252 potential novel regulators of T cell function such as FKBP3, LGALS1, LARP1, CEBP $\beta$  and KLF6  
253 (**Fig. S4D**). Overall, these data suggest that replicated enhancers enriched in pre-treatment NR  
254 samples activate multiple resistance mechanisms in the melanoma cells as well as infiltrating T  
255 cells.

256

### 257 **c-MET Enhancers play functional role in mediating anti-tumor killing**

258 To gain a deeper insight into functional role of enhancer gains in ICB response biology,  
259 we focused on c-MET which showed increased enhancer peaks and associated gene expression  
260 in NR at pre- or post-treatment stage (**Figs. 4A-4B, S4E-S4F**). The c-MET locus harbored multiple  
261 distal enhancers that were present in NR tumors, but not in R tumors, and the HiChIP data  
262 provided evidence for looping between 4 distal enhancers (E1, E2, E3, and E4) and gene  
263 body/transcription start site (TSS) (**Fig. 4A, 4C**). These enhancers were also present in STC2765  
264 melanoma cells as suggested from overlapping H3K27ac peaks (**Fig. 4A**). Consistently, c-MET  
265 expression was localized to melanoma cells when published single cell RNA-Seq data was  
266 queried (**Fig. S4G**) (Tirosh et al., 2016). Silencing of these enhancers using specific gRNAs and  
267 dCas9-KRAB (Klann et al., 2017) significantly reduced expression of the c-MET gene in STC2765  
268 cells (**Fig. 4C**). The cell lines with dCas9-KRAB-mediated enhancer suppression also showed  
269 increased tumor killing by autologous T cells (TIL2765 that were derived from the same tumor as  
270 STC2765) in a co-culture assay, thus demonstrating enhancer functionality (**Fig. 4D**).  
271 Consistently, treatment with a c-MET inhibitor (Crizotinib) also showed enhanced T cell-mediated  
272 killing of STC2765 cells by TIL2765 (**Fig. 4E**). These data provide c-MET enhancers as an  
273 example of functional enhancer elements that contributes to immune evasion process during anti-  
274 PD-1 treatment. Taken together with enhancer activation surrounding numerous regulators of  
275 anti-tumor immune response (Fig. 3), these data suggest that activation of enhancers could be a  
276 key epigenetic mechanism for activation of many regulators and cellular processes that promote  
277 resistance to ICB therapy.

278

## 279 **Enhancer reprogramming during ICB treatment**

280 We next sought to define dynamics of chromatin states as patients progress or respond  
281 to anti-PD-1 therapy by computing chromatin state transitions between pre- and post-treatment  
282 samples. In responders, we primarily observed transitions of active states in pre-treatment to  
283 repressed states in the post-treatment. On the other hand, transitions in the non-responder  
284 samples were distributed more evenly between repressive and active states (**Fig. S5A**). To  
285 determine the reprogramming of active enhancers during the treatment stage, we computed the  
286 chromatin state transition of active enhancer state E7 between post-treatment and pre-treatment  
287 samples (**Fig. S5B**). Seven clusters were identified based on the transition of enhancer states, of  
288 which Cluster 1 enhancers gained repressive states or lost the active enhancer marking, whereas  
289 Cluster 4 enhancers remained in active enhancer state even at the post-treatment stage (**Fig.**  
290 **S5B**). Cluster 1 enhancers were enriched in VEGFA, autophagy, and HIF1 signaling, including  
291 VEGFA, RUNX3, and AKT2 genes (**Figs. S5C-S5D and Table S4**). Unaffected Cluster 4  
292 enhancers were enriched in TGF $\beta$ , PI3K/AKT/mTOR signaling pathways, AHR, and oxidative  
293 stress pathways, including genes such as the TGF $\beta$  and LOXL4 (**Figs. S5E-S5F**). These  
294 observations provide better understanding of the dynamics of enhancer states on specific  
295 pathways during anti-PD1 treatment.

296

## 297 **Combination of bromodomain inhibitors with anti-PD-1 enhances response in mouse** 298 **melanoma models**

299 Since enhancer activation marks multiple genes that regulate resistance to anti-PD-1  
300 antibodies, we reasoned that inhibitors of acetylation-reader bromodomain, which relay the signal  
301 from the enhancers, could be used as an umbrella approach to target many resistance  
302 mechanisms at once along with anti-PD-1 therapy to enhance its efficacy. BRD4 (bromodomain  
303 containing protein 4) has been previously implicated as a major reader of H3K27ac on active

304 enhancers that acts with other transcriptional regulators to activate or enhance gene  
305 expression(Kanno et al., 2014). We noted higher BRD4 levels in metastatic melanoma in  
306 comparison to primary tumors in The Cancer Genome Atlas (TCGA) skin cutaneous melanoma  
307 (SKCM) dataset (**Fig. 5A**). Importantly, the tumors harboring higher levels of BRD4 survived  
308 poorly in comparison to those harboring lower levels of this protein (**Fig. 5B**). Similar trend for  
309 BRD4 (and other family members) expression with progression-free survival was also observed  
310 in Schadendorf cohort (Liu et al., 2019) of advanced melanoma patients treated with anti-PD-1  
311 (but without prior anti-CTLA-4 treatment) (**Figs. 5C, S6A**). Similar to previous reports in ovarian  
312 and triple negative breast cancers (Jing et al., 2020; Zhu et al., 2016), we also observed positive  
313 correlation between BRD4 expression and PDL1 expression (**Fig. 5D**). These clinical validations  
314 of the BRD4 manifest it as an optimal therapeutic target in melanoma. Treatment of tumors  
315 generated by transplantation of murine melanoma cell lines BP [from the Bosenberg model  
316 (Dankort et al., 2009)] and B16-F10 with the combination of iBET-762 and anti-PD-1 antibody  
317 significantly reduced tumor growth at doses that failed to generate much response when used as  
318 monotherapy (**Figs. 5E-5F**). Profiling of CD8+ T cells in these experiments revealed increased  
319 infiltration of these cells upon combination treatment in comparison to monotherapy (**Fig. 5G,**  
320 **S6B**). Consistently, we noted a modest negative correlation between BRD4 expression and  
321 infiltrating tumor cells in the TCGA cohort (**Figs. 5H, S6C**). In addition, treatment of STC2765  
322 cells with bromodomain inhibitors increased the TIL2765-mediated killing in a co-culture assay  
323 (**Fig. 5I**) and increased the MHC class I expression on tumor cells (**Fig. S6D**).

324

### 325 **Bromodomain inhibitor combination with anti-PD-1 downregulates ICB-resistance** 326 **pathways**

327 To investigate the molecular mechanism underlying efficacy of bromodomain inhibitors  
328 and anti-PD-1 combination, we generated RNA sequencing-based transcriptome profiles and  
329 ChIP-Seq based genome-wide occupancy profiles for BRD4 and H3K27ac in the tumors from

330 different groups of treatment in mice. Analysis of RNA-Seq data showed that genes  
331 overexpressed in the tumors treated with combination (iBET-762 plus anti-PD-1) versus control  
332 were associated with immune response, while repressed genes were associated with TGF $\beta$ , MYC  
333 and epithelial–mesenchymal transition (EMT) pathways (**Fig. 6A**). Comparative analysis of  
334 H3K27ac ChIP-Seq data showed a significant decrease of average intensity of H3K27ac-marked  
335 enhancers in combination therapy versus vehicle control group while monotherapy showed  
336 intermediate effect (**Fig. S6E**). Integration of differentially enriched enhancers (DEEs) with DEGs  
337 showed loss of expression of a large number of genes (N = 714) in the combination treatment  
338 group in comparison to the monotherapy group (**Table S5**) or control (IgG) treated samples. While  
339 comparing these data with those from human patients (**Fig. 3**), we also noted reduced BRD4 and  
340 H3K27ac binding on enhancers for c-MET, TGF $\beta$  and genes belonging to PI3K-AKT-MTOR  
341 pathway, angiogenesis pathway (Fukumura et al., 2018) as well as immune checkpoint receptors  
342 in the combination treatment versus control groups. These data suggest that enhancer depletion  
343 may contribute to the decrease in tumor growth associated with combination treatment (**Figs. 6B,**  
344 **S6F-S6J**). Importantly, enhancer loss on many of these genes were associated with decreased  
345 gene expression in the combination treatment group (**Figs. 6C, S6G-S6I, S6K**). Hence, we  
346 extended the integration between DEGs and DEEs in mouse experiment to the gene targets of  
347 NR-enriched enhancers from patient samples. This revealed 107 genes with co-incident loss of  
348 expression, loss of binding of BRD4 and loss of H3K27ac active enhancer marks in combination  
349 iBET-762 plus anti-PD-1 treatment in comparison to the control treated group (**Fig. 6D**). These  
350 genes were enriched in WNT, TGF $\beta$ , epithelial-to-mesenchymal transition, and UV response  
351 pathways (**Figs. 6E, S6L**). Overall, these data provide evidence for enhancer-mediated activation  
352 of key resistance-driving genes/pathways as an epigenetic mechanism for resistance to ICB and  
353 demonstrate the need for clinical studies focused on the combination of enhancer-blocking agents  
354 and ICB to improve the response rate in melanoma and potentially other malignancies.  
355

356 **DISCUSSION**

357 Our data help address two major clinical needs regarding ICB therapy in metastatic  
358 melanoma: 1) biomarkers that predict ICB response and 2) combination therapy strategies to  
359 improve the response to ICB. We observed that gains in enhancer activity on a set of genomic  
360 loci are associated with response to ICB and thus could potentially act as a predictive biomarker  
361 of response to ICB in metastatic melanoma. Our data also suggest causative roles for enhancer  
362 gains in non-response to ICB and supports the use of enhancer-blocking clinical agents in  
363 combination with anti-PD-1 as a potential strategy that can be tested in future clinical trials.

364 We identify an enhancer-based signature of 437 enhancers that could potentially be used  
365 as an epigenomic biomarker for non-response to ICB therapy in melanoma. Of these, 32  
366 enhancers further predicted progression-free survival, suggesting the potential use of this  
367 epigenomic signature as a prognostic indicator. These signatures have the potential to be utilized  
368 alone or in combination with other genomic, transcriptomic, or immune features to generate a  
369 multi-omic signature to predict response or survival in patients on ICB therapy. Indeed,  
370 incorporation of other features such as tumor mutation burden (Goodman et al., 2017) may  
371 enhance this predictive potential of enhancer signatures. Other features, such as specific genetic  
372 features, such as PTEN deletion (Peng et al., 2016), IFN $\gamma$ R deletions (Gao et al., 2016), PBRM1  
373 mutations, and KMT2D mutations (Wang et al., 2020), have been associated with response to  
374 ICB and could also be considered in combination with an enhancer-based signature to develop  
375 better prognostic biomarkers.

376 Our work suggests that pre-existing enhancer states could contribute to innate resistance  
377 to immune checkpoint therapy. Importantly, the overlap between the MDACC and MGH cohorts  
378 was highly significant at the pre-treatment stage, but not at on-treatment or post-treatment stage,  
379 suggesting that baseline chromatin states of the tumor are likely important drivers of ICB response  
380 and impact of ICB therapy on enhancer patterns of melanoma tumors significantly varies between  
381 different patients. Indeed, pre-existing chromatin states differ between individuals and, depending

382 on their nature, could act as barrier to or facilitate activation of the tumor pathways that mediate  
383 immune recognition, immunogenicity or T cell–mediated killing (e.g., checkpoint receptors/ligands  
384 such as PD-L1, IFN/GAS/STING pathways, MHC expression or EMT) (Blank et al., 2005; Terry  
385 et al., 2017) (Bhat et al., 2017; Garcia-Lora et al., 2003; Kwon and Bakhoun, 2020). As an  
386 extension, adaptive resistance could also result from gain of enhancers on ICB resistant pathways  
387 during the course of treatment.

388 Bromodomain inhibitors serve as a useful tool for assaying whether enhancer blockade  
389 contributes to a specific phenotype. Here, combinations of bromodomain inhibitors enhance the  
390 activity of anti-PD1 suggesting that enhancer activation is likely a barrier to T-cell mediated killing  
391 of tumor cells. Indeed, integrative analysis of transcriptomic and epigenomic data between murine  
392 tumors treated with BRDi/anti-PD-1 combo and human anti-PD-1 tumors shows 362 enhancers  
393 (and their 107 target genes) as likely significant contributors to anti-PD-1 response. These  
394 enhancers target key pathways of WNT/ $\beta$ -catenin, EMT, TGF $\beta$  and UV response consistent with  
395 prior roles of some of these pathways in immune modulation (Luke et al., 2019; Mariathasan et  
396 al., 2018; Terry et al., 2017; Trujillo et al., 2019). These enhancers/genes could potentially serve  
397 as pharmacodynamic markers for BRDi in future clinical/pre-clinical studies.

398 Overall, our studies support further prospective clinical investigation into the utility of these  
399 enhancer signatures in predicting response to immunotherapy, offering prognostic information,  
400 and informing combinatorial clinical trials facilitated by cutting-edge epigenomic tools. Finally, our  
401 data suggest a need for future clinical studies to test potency of the BRDi or other enhancer  
402 blocking inhibitors [such as CDK9/7(Kwiatkowski et al., 2014; Morales and Giordano, 2016)] in  
403 combination with immune checkpoint inhibitors.



## 404 **METHODS**

### 405 **Patient samples**

406 Tissue samples from metastatic melanoma patients were collected and viably frozen as part of  
407 an IRB-approved tissue banking protocol at MDACC and MGH. All patients signed written  
408 informed consent prior to having the sample collected. All patients received either pembrolizumab  
409 or nivolumab as the anti-PD-1 therapy for their metastatic melanoma. Thirty-six melanoma tumor  
410 samples (17 samples at baseline, 4 samples on-treatment and 15 samples post-treatment) from  
411 MDACC and 20 samples (8 samples at baseline, 9 samples on-treatment and 3 samples post-  
412 treatment) from MGH were analyzed by ChIP-seq. We also analyzed 12 RNA-access samples (7  
413 samples at baseline and 5 samples post-treatment) from MDACC and 32 RNA-seq samples (20  
414 samples at baseline and 12 samples post-treatment) from MGH for RNA expression. Response  
415 rates were assessed based on RECIST criteria. Sex, age, disease stage, and progression time  
416 of each sample are included in **Table S1**.

417

### 418 **Cell lines**

419 Short-term culture (STC) tumor cells and TILs pair were obtained from the same anti-PD-1–  
420 treated melanoma patient. Short-term culture tumor cells were cultured in RPMI and GlutaMAX  
421 supplemented with 10% fetal bovine serum, HEPES, human transferred insulin, and  $\beta$ -  
422 mercaptoethanol. TILs were cultured in RPMI and GlutaMAX supplemented with 10% human  
423 serum, sodium pyruvate, HEPES, human transferred insulin,  $\beta$ -mercaptoethanol and 3000IU/ml  
424 IL2 (PeproTech). The B16-F10 and BP melanoma cell lines and 293T cells were cultured in  
425 complete DMEM high-glucose medium, supplemented with 10% fetal bovine serum. All cell lines  
426 were cultured at 37°C with 5% CO<sub>2</sub>.

427

### 428 **Animal studies**

429 All animal studies were performed according to the MDACC Institutional Animal Care and Use  
430 Committee (IACUC)-approved protocols. Five million B16-F10 or BP melanoma cells were  
431 injected subcutaneously into 6- to 8-week-old C57BL/6J mice (The Jackson Laboratory, #000664)  
432 and monitored every other day for tumor growth. On day 6 when tumors were palpable, mice with  
433 established tumor were randomly divided into 4 cohorts and treated every other day with IgG (100  
434 µg/mouse), anti-PD-1 (100 µg/mouse), iBET-762 (7.5 mg/kg), or PBS (phosphate-buffered saline)  
435 via intraperitoneal injection until 14 days. Tumor volume was measured every other day. Mice  
436 were euthanized once any arm of the treatment developed tumors approaching or beyond the  
437 IACUC-approved limit of 1.5 cm.

438

#### 439 **MDACC ChIP-Seq**

440 ChIP was performed as described earlier (Terranova et al., 2018) with optimized shearing  
441 conditions and minor modifications. ChIP of 5-10 mg of flash-frozen patient melanoma tumors  
442 and mouse tumors were performed using 2 mg of antibody per ChIP experiment for H3K4me1  
443 (#ab8895), H3K27ac (#ab4729), H3K4me3 (#ab8580), H3K79me2 (#ab3594), H3K4me9  
444 (#ab8898), 3 mg of antibody per ChIP experiment for H3K27me3 (#ab6002), and 5 mg of antibody  
445 per ChIP experiment for BRD4 (#ab128874; all from Abcam). ChIP of 2-3 million of patient derived  
446 short-term culture tumor cells and TILs were performed using 5 mg of antibody per ChIP  
447 experiment for H3K27ac (#ab4729). Enriched DNA was quantified using Qubit (Thermo Fisher  
448 Scientific), and ChIP libraries were amplified and barcoded using the NEBNext Ultra II DNA library  
449 preparation kit (New England Biolabs) according to the manufacturer's recommendations.  
450 Following library amplification, DNA fragments were size-selected (200-600 bp) using AMPure  
451 XP beads (Beckman Coulter), assessed using Bioanalyzer (Agilent Technologies), and  
452 sequenced at the Advanced Technology Genomics Core (MDACC) using Illumina HiSeq 2000  
453 (36-bp single-end format).

454

455 **MGH ChIP-Seq**

456 A total of 20-50 mg of snap-frozen melanoma tissues were pulverized by Geno/Grinder for 2 min  
457 at 1500 rpm and then fixed with 1% methanol-free formaldehyde plus protease inhibitor cocktails  
458 (Roche) for 10 min at room temperature and quenched by 125  $\mu$ M glycine for 5 min at room  
459 temperature. Samples were incubated in cold radioimmunoprecipitation assay buffer (RIPA  
460 buffer: 50 mM Tris pH 8.0, 150 mM NaCl, 1% NP-40, 0.5% deoxycholate, 0.1% SDS)  
461 supplemented with protease inhibitor and sonicated using Covaris E220. Supernatants were  
462 quantified using Bio-Rad protein assay kits, and 1 mg of protein was loaded on 96-well plates for  
463 ChIP.

464 Protein A/G-coated silica columns embedded pipette tips were used for  
465 immunoprecipitating H3K27Ac antibody-bounded proteins instead of Protein A/G beads. The  
466 DNA was eluted in 100  $\mu$ l 50 mM Tris pH 8.0 and 10 mM EDTA with 1% SDS after several washes,  
467 and the eluates were treated with proteinase K for 16 h at 65°C before library synthesis using  
468 NEBNext Ultra II DNA library preparation kits (New England Biolabs). The samples were  
469 sequenced on HiSeq 2000 (Illumina), and 30-50 million paired-end reads from each sample were  
470 recorded.

471

472 **ChIP-seq analysis**

473 ChIP-seq data were quality controlled and processed by pyflow-ChIPseq (Tang, 2017a) a ChIP-  
474 seq pipeline based on snakemake (Koster and Rahmann, 2012). Briefly, raw reads were mapped  
475 by bowtie1 (Langmead et al., 2009) to the hg19 genome. Duplicated reads were removed, and  
476 only uniquely mapped reads were retained. RPKM-normalized bigwigs were generated by deep  
477 tools (Ramirez et al., 2016), and tracks were visualized with Integrative Genomics Viewer  
478 (Robinson et al., 2011). Narrow peaks were called using MACS1.4 (Zhang et al., 2008) with a p-  
479 value of 1e-5. For broad domains, the MACSv2.0.10 peak caller was used with a --broad-cutoff  
480 p-value of 1e-5. Chromatin state was called using ChromHMM (Ernst and Kellis, 2012), and the

481 emission profile was plotted by ComplexHeatmap (Gu et al., 2016). Chromatin state models were  
482 learnt jointly on all data for all 6 histone marks (H3K4me1, H3K4me3, H3K27ac, H3K79me2,  
483 H3K9me3 and H3K27me3) from 25 melanoma tumors and a model with 15 states was chosen  
484 for detailed analysis. Heatmaps were generated using R package EnrichedHeatmap (Gu et al.,  
485 2018). Super-enhancers were identified using ROSE (Loven et al., 2013) based on H3K27ac  
486 ChIP-seq data.

### 487 **Chromatin State Transition Analysis**

488 ChromHMM profiles of 6 pre-treatment non-responders and 5 pre-treatment responders were  
489 consolidated using epilogos. A pipeline was made to automate the calculation, and scripts used  
490 to re-code the ChromHMM states can be found at [https://github.com/crazyhottommy/pyflow-](https://github.com/crazyhottommy/pyflow-chromForest/tree/vsurf_merge)  
491 [chromForest/tree/vsurf\\_merge](https://github.com/crazyhottommy/pyflow-chromForest/tree/vsurf_merge). With the output of epilogos, the chromatin state for each bin was  
492 chosen for the state that contained the greatest weights. A helper script can also be found at the  
493 link above. The consolidated ChromHMM profiles by epilogos were compared. The number of  
494 bins that switched chromatin states between groups was obtained. The number of bases that  
495 showed the transition change was obtained by multiplying the number of bins with the bin size  
496 (1000 bp). A Circos transition plot was made by the “circlize” R package. The script can be found  
497 in the GitLab repository  
498 [https://gitlab.com/tangming2005/SKCM\\_IMT/blob/master/scripts/choose\\_state.py](https://gitlab.com/tangming2005/SKCM_IMT/blob/master/scripts/choose_state.py).

499 The consolidated ChromHMM profiles by epilogos were read into the R package  
500 EnrichedHeatmap. The chromatin state (categorical variable) was plotted in a 25-kb window  
501 centered on the active enhancer bins (chromatin state E7). Only bins that had E7 in one of the  
502 groups were retained for plotting. For 2-group comparisons, the bins were merged if the same  
503 change of state occurred in consecutive bins. A helper script can be found  
504 in [https://gitlab.com/tangming2005/SKCM\\_IMT/blob/master/scripts/merge\\_bin.py](https://gitlab.com/tangming2005/SKCM_IMT/blob/master/scripts/merge_bin.py).

505

### 506 **M-value processing and IDR calculations**

507 To derive the M-values, we first used .bam files from both the ChIP and whole-cell extract files,  
508 along with a common peak file of 244,472 peaks, as inputs to MANorm using default arguments.  
509 The common peak file was generated using the MACS2 “bdgdiff” function between combined  
510 pileups of responder and non-responder samples across the MDACC and MGH cohorts. The  
511 resulting normalized outputs from MANorm were first used to filter samples by imposing an  $M > 0$   
512 and  $p < 0.05$  filter. All samples had to have 20% of peaks bypassing the threshold, or they were  
513 discarded from the analysis. Thirty samples from the MGH cohort passed this filter, while 27  
514 MDACC samples passed this filter. Next, we subjected the samples to the IDR algorithm. In this  
515 case, average M-values for all peaks were calculated for both cohorts, and the 2 average M-value  
516 vectors were utilized as inputs to the IDR algorithm with default arguments. The resulting 77,356  
517 peaks were considered the final replicated peak set used for all downstream analyses.

518

### 519 **Differential H3K27ac ChIP activity calling**

520 By leveraging the M-values, we determined the responder vs. non-responder differential  
521 response. We first batch-normalized the 2 cohorts’ M-values using the ComBat algorithm from  
522 the R package “sva” (Leek et al., 2012). Next, we used limma’s empirical Bayes modeling  
523 framework to construct a linear model regressing response and treatment time against M-values.  
524 We modeled patient identity—for patients with more than one sample analyzed— as a random  
525 effect. In order to be considered validated, a peak has to fulfill the nominal p-value cutoff of both  
526 the MDACC and MGH cohorts and the sign of the coefficients must be the same across the two  
527 cohorts. We note that this nominal p-value cutoff is ordinarily insufficient to control for false  
528 positive discoveries in a single cohort study. However, we require explicit confirmation for putative  
529 differential peaks in both MDACC and MGH cohort. The combined false positive rate for a gene  
530 to be falsely discovered in two distinct datasets is substantially lower than what the nominal p-  
531 value cutoff would suggest.

532

533 **Predicting immunotherapy response based on epigenomic features.**

534 We first stratified the dataset into 22 ChIP-seq and 26 RNA-seq cross-validation. Within each fold,  
535 the N=21 ChIP-seq and N=25 RNA-seq training examples were first stratified into MDACC and  
536 MGH cohorts. Within each cohort, we repeated the differential peak calling process to identify a  
537 set of replicated peaks at nominal p-value less than 0.05. We used the replicated peaks as  
538 features to a random forest binary classifier with 5 to 20 trees on the training data using the R  
539 package “randomForest”(Liaw and Wiener, 2002). We reported the ROC and auROC based off  
540 the classifier that had the highest LOO-CV auROC for each assay type. We then assessed the  
541 predictive of the performance by evaluating the predicted probability on the held out testing  
542 sample across all 22 ChIP-seq and 26 RNA-seq folds against the ground truth labels. We plotted  
543 the ROC and calculated the auROC using the R package “plotROC”(Sachs, 2017).

544

545 **Global test for groups of peaks**

546 To run the global test for genes, we first associated each of the peaks in the common peak set  
547 with a gene via the HOMER (Heinz et al., 2010) annotatePeak function. Each gene’s associated  
548 peaks were organized as a group for the global test. The global test was conducted using the  
549 function “gt” with default parameters using the “globaltest” R package (Goeman et al., 2004).

550

551 **RNA Access sequencing and analysis of MDACC tumors**

552 mRNA libraries of the melanoma tumor (n = 12) samples were prepared from 200 ng of total RNA  
553 using the TruSeq Stranded mRNA HT Sample Preparation Kit. Samples were dual-indexed before  
554 pooling. Libraries were quantified by qPCR using the NGS Library Quantification Kit. Pooled  
555 libraries were sequenced using the HiSeq 2000 (Illumina) according to the manufacturer’s  
556 instructions. An average of approximately 30 million paired-end reads per sample were obtained.

557 The quality of raw reads was assessed by using FastQC  
558 (<https://www.bioinformatics.babraham.ac.uk/projects/fastqc/>). The raw reads were aligned to the  
559 *Homo sapiens* genome (hg19) using STAR 2.4.2a (Dobin et al., 2013)  
560 ([https://github.com/alexdobin/STAR/releases/tag/STAR\\_2.4.2a](https://github.com/alexdobin/STAR/releases/tag/STAR_2.4.2a)). The mappability of unique reads  
561 on average was ~89% RNA-seq dataset. The raw counts were computed using the quantMode  
562 function in STAR. The read counts that were obtained are analogous to the expression level of  
563 each gene across all the samples. Genes with raw mean reads of greater than 10 were used for  
564 normalization and differential gene expression analysis using the DESeq2 (Love et al., 2014)  
565 package in R. Genes with an absolute log<sub>2</sub> fold-change greater than log<sub>2</sub>(1.5) and  $p < 0.05$  were  
566 called as differentially expressed genes. SKCM TCGA RNA-seq transcription comparison  
567 analysis was performed on the UALCAN website (Chandrashekar et al., 2017).

568

#### 569 **RNA-seq and analysis of MGH tumors**

570 Total RNA from 5-20 mg of melanoma primary and metastatic tissues was extracted using AllPrep  
571 DNA/RNA Mini isolation kit (Qiagen). A total of 100 ng of total RNA was used as input for RNA-  
572 seq libraries using SMARTer Stranded Total RNA-seq - Pico input (Takara Bio USA, Inc.) to  
573 remove rRNA transcripts. Each library was sequenced on HiSeq 2000 (Illumina), and  
574 approximately 20 million single-ended reads were recorded. Reads were aligned to *Homo sapiens*  
575 reference hg38 using STAR 2.5.3. Read counts were quantified using featureCounts. Differential  
576 expression was performed via limma-voom (Ritchie et al., 2015). Multiple biological replicates  
577 stemming from the same patient were treated as a random effect, whereas batch effects were  
578 treated as a fixed effect.

#### 579 **RNA-Seq analysis of murine tumor cells**

580 mRNA libraries of the mouse melanoma tumor (n = 12) samples were prepared and sequenced  
581 using the HiSeq 2000 (Illumina). RNAseq data were processed by pyflow-RNAseq (Tang, 2017b),

582 a snakemake based RNAseq pipeline. Raw reads were mapped by STAR (Dobin et al., 2013),  
583 RPKM normalized bigwigs were generated by *deeptools* (Ramirez et al., 2016), and gene counts  
584 were obtained by *featureCount* (Liao et al., 2014). Differential expression analysis was carried  
585 out using *DESeq2* (Love et al., 2014). Gene set enrichment analysis (GSEA) was done using the  
586 GSEA tool (Subramanian et al., 2005) in pre-rank mode. The signed fold change  $-\log_{10}(\text{pvalue})$   
587 metric was used to pre-rank the genes.

588

### 589 **WGS data analysis and TMB calculation**

590 Whole genome sequencing data from 34 anti PD-1 treated melanoma patient samples were  
591 aligned to human reference genome version hg38 using the Burrows-Wheeler Alignment tool  
592 (v.0.7.17), and duplicate removed by samtools (v.1.15). Somatic single nucleotide variations  
593 (SNVs) were identified using Mutect 2 (v.4.2.4.1), and variants likely to be germline were filtered  
594 out by gnomAD (v.2) and FilterMutectCalls. Tumor mutation burden was defined as the number  
595 of non-synonymous mutations in the coding region per megabase.

596

### 597 **HiChIP and data analysis**

598 HiChIP experiments were performed as previously described by Mumbach et al. (Mumbach et al.,  
599 2016), with minor modifications. Briefly,  $1 \times 10^7$  ICB resistant STC cells were crosslinked. In situ  
600 contacts were generated in isolated and pelleted nuclei by DNA digestion with MboI restriction  
601 enzyme, followed by biotinylation of digested DNA fragments with biotin-dATP, dCTP, dGTP, and  
602 dTTP. Thereafter, DNA was sheared with Covaris E220 with the following parameters: fill level =  
603 10, duty cycle = 5, PIP = 140, cycles/burst = 200, and time = 4 min; ChIP was done for H3K27Ac  
604 using the anti-H3K27ac antibody. After reverse-crosslinking, 150 ng of eluted DNA was taken for  
605 biotin capture with Streptavidin C1 beads followed by transposition with Tn5. In addition,  
606 transposed DNA was used for library preparation with Nextera Ad1\_noMX, Nextera Ad2.X  
607 primers, and Phusion HF 2X PCR Master Mix. The following PCR program was performed: 72°C



608 for 5 mins, 98°C for 1 min, then cycle at 98°C for 15 s, 63°C for 30 s, and 70°C for 1 min. Afterward,  
609 libraries underwent double-sided size selection with AMPure XP beads. Finally, libraries were  
610 paired-end sequenced with reading lengths of 76 nucleotides. HiChIP paired-end reads were  
611 aligned to the Mbol-digested hg19 genome using the HiC-Pro pipeline with default conditions.  
612 The default setting of HiC-Pro removes duplicate reads, assigns reads to Mbol fragments,  
613 identifies valid interactions, and generates high-resolution interaction matrices. HiChIP for  
614 H3K27ac generated high-resolution contact maps containing ~65 million valid interactions in  
615 STC2765 cells. Files for Juicebox visualization were generated using the HiC-Pro  
616 `hicpro2juicebox.sh` command based on the total valid interactions. H3K27ac-mediated loops were  
617 identified with the `hichipper/diffloop` programs using the HiC-Pro (Servant et al., 2015) output and  
618 ChIP-seq peaks from H3K27ac as anchor loci. *Hichipper* identifies intrachromosomal looping  
619 between anchor loci within 5 kb to 2 MB and produces a per-loop FDR value from the loop  
620 proximity bias correction implemented by Mango. Using the Mango output from `hichipper` (Lareau  
621 and Aryee, 2018), `diffloop` was used to filter significant loops (FDR < 0.01, width ≥ 5000, loop-  
622 count ≥ 2) and define enhancer-enhancer and enhancer-promoter interactions.

### 623 **Enhancer data analysis – peak-to-gene linking predictions**

624 To identify putative causal links between enhancer peaks and gene expression, we used a HiChIP  
625 based approach. Enhancer-promoter interaction catalogs from STC2765 Hi-ChIP data and from  
626 a previous publication (Cao et al., 2017) was overlapped with the query enhancer peaks in order  
627 to obtain its target refseq promoter. In addition, we also used the ChIPseeker package for  
628 annotation, using `addFlankGeneInfo` function for SEs.

629

### 630 **Pathway analysis**

631 Differential enhancer-associated genes in each group were imported into the `clusterProfiler` (Yu  
632 et al., 2012) or Consensus PathDB (<http://cpdb.molgen.mpg.de/>) for pathway analysis, restricted  
633 to Gene Ontology, KEGG, Hallmark, and WikiPathways gene sets. The “`enrichplot`” package (Yu,

634 2019) was used to generate dot plots and networks for gene sets enriched with an FDR cut-off of  
635 < 0.05.

636

### 637 **Enrichment of motifs in cell-specific enhancer peaks**

638 To identify the motifs over-represented within each enhancer peak sets, we used the HOMER  
639 motif database and the coordinates of melanoma cells or TILs specific peak sets.

640

### 641 **Enhancer modulation using CRISPR-dCas9-KRAB**

642 To modulate gene expression without altering the target DNA sequences, an RNA-guided,  
643 catalytically inactive Cas9 (dCas9) fused to a transcriptional repressor domain (KRAB) was used  
644 to silence genomic regions identified as enhancers via KRAB repression at the promoter region.  
645 To generate a dCas9-KRAB effector stable cell line, we produced lentiviral particles from pHAGE  
646 EF1 $\alpha$ -dCas9-KRAB (Addgene plasmid #50919) using Pax2 and VSVg. Transduced cells were  
647 selected for 6 days with the use of antibiotic resistance and were expanded to generate a stable  
648 cell line.

649 Next, gRNAs were designed by using the GPP Web Portal of the Broad Institute. gRNAs  
650 sequences are listed in **Table S6**. Annealed gRNA oligos were ligated to pLKO.1-puro U6 sgRNA  
651 BfuAI stuffer (Addgene plasmid #50920), and lentiviral particles were generated. A transduction  
652 procedure was performed in the stable dCas9-KRAB cell line, and transduced cells having both  
653 dCas9-KRAB and gRNA constructs were selected with the use of antibiotic resistance. To  
654 evaluate the effects of the recruitment of dCas9-KRAB to the target enhancer's genomic region,  
655 H3K27ac ChIP followed by quantitative PCR for enhancer regions was performed to assess the  
656 enrichment level of H3K27ac at the enhancer site in modulated cells compared with the non-  
657 modulated parental control cells. To investigate the impact of enhancers' modulation on the  
658 corresponding gene expression, qRT-PCR was performed for the target gene.

659

660 **RT-qPCR**

661 RNA was isolated using RNeasy kit (qiagen) using manufacturer's protocol. cDNA was prepared  
662 using SuperScript III first strand synthesis kit (Thermo Fisher) using 2ug of RNA and  
663 manufacturer's protocol. Quantitative PCR was performed using QuantiTect Sybr Green PCR kit  
664 in Stratagene's Mx3000p system.

665

666 ***In vitro* inhibitor assays**

667 Melanoma short-term culture line STC2765 were treated with crizotinib (2  $\mu$ M, 24 h) or iBET-762  
668 (1  $\mu$ M, 72 h) prior to co-culture with TIL2765 cells.

669

670 **TILs and matched tumor cells co-culture**

671 Tumor cells were labeled with DDAO-SE followed by addition of an effector cell suspension to  
672 achieve the desired effector:target ratio. These co-cultures were incubated at 37°C in 5% CO<sub>2</sub> in  
673 a humidified incubator for 3 h. The cells were fixed and permeabilized with Cytofix/Cytoperm  
674 solution (BD Biosciences, #554722) for 20 min at RT immediately. The cells were stained for 30  
675 min on ice with 5  $\mu$ l of biotin-labeled anti-cleaved caspase-3 monoclonal antibody (BD  
676 Biosciences, #550821). The cells were washed in Perm/Wash buffer (BD Biosciences, #554723)  
677 2 times and re-suspended in PBS and 1% fetal bovine serum for analysis on a flow cytometer.

678

679 **Flow cytometry**

680 TILs were stained with fluorochrome-conjugated monoclonal antibodies (CD3, CD4, and CD8  
681 from BD Biosciences) in FACS wash Buffer (Dulbecco's phosphate buffered saline 1 $\times$  with 1%  
682 bovine serum albumin) for 30 min on ice for surface staining. Dead cells were excluded using  
683 Ghost Dye<sup>TM</sup> Violet 450 cell viability dye from Tonbo Biosciences. For intracellular staining of  
684 active caspase-3, cells were fixed and permeabilized using Cytofix/Cytoperm (BD Biosciences)

685 and stained with anti-cleaved caspase-3 (BD Biosciences) on ice as well. Stained cells were  
686 acquired using BD FACSCanto II and analyzed using FlowJo software (Tree Star).

687

### 688 **Survival analysis**

689 The “survminer” package was used for drawing the Kaplan-Meier plots and defining the optimal  
690 threshold (function surv). The outcome was overall survival censored at 10 years. p-values  
691 reported for the univariate model corresponded to the log-rank test.

692

### 693 **Statistical analysis**

694 The 2-tailed Student *t*-test was used to determine the statistical significance of 2 groups of data  
695 using GraphPad Prism. Data are presented as means ± standard error of the mean (SEM, error  
696 bars) of at least 3 independent experiments or 3 biological replicates. p-values less than 0.05  
697 were considered statistically significant. \*,  $p < 0.05$ ; \*\*,  $p < 0.01$ ; and \*\*\*,  $p < 0.001$ . Correlation of  
698 expression level between BRD4 and CD274(PD-L1) was computed with nonparametric  
699 Spearman’s rank correlation coefficient.

700

### 701 **Data and code availability**

702 All ChIP-Seq dataset generated from ICB treated melanoma tumors have been deposited into the  
703 Gene Expression Omnibus (GEO) repository (accession #GSE171283). All codes are available  
704 at <https://gitlab.com/railab>.

705 **FIGURE LEGENDS**

706 **Figure 1: Comprehensive epigenome profiling of anti-PD-1–treated melanoma patients**  
707 **identify enhancer set as predictive biomarker of non-response to ICB.**

708 **A.** Schematic diagram describing the approach and main findings of the study.

709 **B.** Emission parameters of the 15-state chromatin state model defined using ChromHMM on  
710 ChIP-Seq data for 6 histone modification marks (shown on x-axis) in the discovery cohort from  
711 MDACC (n = 36). Annotations on the left are derived from the relative enrichment of different  
712 histone marks and genomic distribution of the loci in that particular state (Fig. S1D). The intensity  
713 of the color in each cell reflects the frequency of occurrence of that mark in the corresponding  
714 chromatin state on the scale from 0 (white) to 1 (blue).

715 **C.** Heatmap showing the fold enrichment of chromatin state transitions between responder and  
716 non-responder pre-treatment samples for the 15-state model defined by the ChromHMM. Color  
717 intensities represent the relative fold enrichment. Yellow box points to switches in active enhancer  
718 state E7 in non-responder to rest in responder. Diagonal is grayed to highlight non-self state  
719 transitions.

720 **D.** Heatmap of chromatin state intensities for 31,155 loci that show switch from active enhancer  
721 state E7 (yellow) in non-responder pre-treatment samples (left) to any other state in responder  
722 pre-treatment samples (right) as shown by colors for each state. Note the high percentage of non-  
723 responder active enhancer state E7 transitioning to low or repressed states E12 (black), E11  
724 (gray), or E10 (purple) in responders. p-value presented is for a 2-tailed Student *t*-test.

725 **E.** Heatmap for H3K27ac mark in 24,862 peaks corresponding to 21,924 bins with active  
726 enhancer states that shows consistent depletion in responder pre-treatment samples (right 5  
727 samples) compared with non-responder pre-treatment samples (left 6 samples). Enhancers are  
728 shown in a 20-kb window centered on the middle of the enhancer in non-responder and responder  
729 pre-treatment samples.

730 **Figure 2: Validation of enhancer signature's prediction of nonresponse in an independent**  
731 **cohort.**

732 **A.** Average M-values for MGH vs. MDACC cohorts with IDR (Irreproducible Discovery Rate)  
733 status  $<0.01$ . Individual points represent averaged M-value across the MDACC cohort (x-axis)  
734 and across the MGH cohort (y-axis). Color denotes whether a particular peak was flagged by IDR.

735 **B.** Receiver operating characteristic (ROC) of random forest trained predictive models using  
736 leave-one-out cross-validation across N=22 pre-treatment ChIP-seq samples and N=26 pre-  
737 treatment RNA-seq samples. The features within each cross-validation fold were determined by  
738 finding the set of replicated peaks or genes across the MDACC and MGH cohorts and by  
739 computing the set of intersecting peaks or genes that were nominally significant in the training set  
740 within both cohorts. We analyzed a total of 23,457 RNA-seq genes and 84,317 ChIP-seq peaks.  
741 This was used to train a random forest within each training set with K=5 to K=20 trees. ROC and  
742 auROCs were derived from the best performing random forest classifier. The ROC curve and  
743 auROC was formed by concatenating predictions from the N=22 ChIP-seq and N=26 RNA-seq  
744 cross validation folds.

745 **C.** Kaplan-Meier plots for progression-free survival of patients in MDACC (left) or MGH (right)  
746 cohorts for 29 out of the 32 peaks which offered worse prognosis as a result of increased peak  
747 signal. The normalized ChIP activity values were studentized across the MDACC cohort, then the  
748 median value was used to determine the high-activity vs. low-activity groups. There was a total of  
749 8 patients (4 low enhancer activity, 4 high enhancer activity) in the MGH group and a total of 14  
750 patients (7 low enhancer activity, 7 high enhancer activity) in the MDACC group. The peaks were  
751 selected using a  $p=0.05$  cutoff for the Cox proportional hazards test.

752 **Figure 3: Enhancer activation marks key immune resistance-associated genes in anti-PD-**  
753 **1 non-responders.**

754 A. List of significantly enriched pathways in genes targeted by replicated H3K27ac peaks (n=966,  
755  $p < 0.1$ ) that overlap with those from isolated melanoma cells (n=270, left) or TILs (n=110, right)  
756 enhancer peaks.

757 B. List of significantly enriched transcription factor (TF) motifs in replicated H3K27ac peaks that  
758 overlap with those derived from isolated melanoma cells (n=270, left) or TILs (n=110, right) .

759 C. IGV (Integrated Genomic Viewer) snapshot of aggregate H3K27ac profiles around TGF $\beta$ 2,  
760 XIST, SPATA2, RFPL2 and MAMDC2 genes in MDACC cohort non-responder (NR) samples,  
761 responder (R) samples, isolated melanoma STCs, or isolated TILs. Highlighted regions show  
762 enrichment of H3K27Ac enhancer peaks in NR samples compared to R samples.

763 D. Box plot showing mRNA expression level of TGF $\beta$ 2, XIST, SPATA2, RFPL2 and MAMDC2  
764 genes in NR and R pre-treatment samples from both cohorts. In the box plot, the bottom and top  
765 of the rectangles indicate the first quartile (Q1) and third quartile (Q3), respectively. The horizontal  
766 lines in the middle signify the median (Q2), and the vertical lines that extend from the top and the  
767 bottom of the plot indicate the maximum and minimum values, respectively.

768 E. IGV snapshot of aggregate H3K27ac profiles around CD48, LAG-3, and BTLA genes in  
769 MDACC cohort NR samples, R samples, isolated melanoma STCs, or isolated TILs. The red line  
770 loops depict E-P interactions identified from H3K27ac HiChIP data from STC2765 cells and/or  
771 previously predicted E-P networks (Cao et al., 2017). Highlighted regions show enrichment of  
772 H3K27Ac enhancer peaks in NR samples compared to R samples.

773 **Figure 4: Enhancer activation of c-MET contributes to non-response to ICB.**

774 **A.** IGV snapshot of aggregate H3K27ac profiles around c-MET gene in NR samples, R samples,  
775 isolated melanoma STCs, or isolated TILs. The red line loops depict E-P interactions identified  
776 from H3K27ac HiChIP data from STC2765 cells and/or previously predicted E-P networks (Cao  
777 et al., 2017). Highlighted regions show enrichment of H3K27Ac enhancer peaks in NR samples  
778 compared to R samples.

779 **B.** Box plots showing normalized RNA counts for c-MET gene between NR and R samples at pre-  
780 and post-treatment stages.

781 **C.** Top, genomic locations of c-MET enhancers (En1 through En5) and HiChIP-derived E-P loops.  
782 Middle, schematic of dCas9-KRAB mediated repression of c-MET enhancer. Bottom, bar plot  
783 showing fold change of gene expression for c-MET gene upon targeting of enhancers by specific  
784 gRNAs as indicated.

785 **D-E.** Percentage of cleaved caspase-3 positive STC2765 post co-culture with autologous TIL2765  
786 at 3 different ratios of TIL:STC ratio (1:1, 3:1 and 5:1). In panel **D**, STC2765 cells harboring dCas9-  
787 KRAB and control or c-MET enhancer gRNAs were used as target cells, whereas in panel **E**,  
788 parental STC2765 cells were treated with c-MET inhibitor crizotinib (for 24 hrs at 2 $\mu$ M) before  
789 and during co-culture.

790 In (**B**) and (**D-E**) box plots, the bottom and top of the rectangles indicate the first quartile (Q1) and  
791 third quartile (Q3), respectively. The horizontal lines in the middle signify the median (Q2), and  
792 the vertical lines that extend from the top and the bottom of the plot indicate the maximum and  
793 minimum values, respectively.



794 **Figure 5: Targeting enhancers using bromodomain inhibitors in combination with anti-PD-**  
795 **1 antibody confers synergistic tumor growth reduction.**

796 **A.** Box plot showing mRNA expression level of BRD4 in TCGA normal, primary, and metastatic  
797 melanoma patient samples. Metastatic melanoma patient samples display significantly higher  
798 expression in comparison to primary tumors.

799 **B.** Kaplan-Meier plot of survival of melanoma samples in the TCGA, comparing overall survival  
800 between groups with high BRD4 expression (n=114) and low BRD4 expression (n=345). The log-  
801 rank (Mantel-Cox) *p* value was used to assess the significance of difference in survival.

802 **C.** Kaplan-Meier plot of progression-free survival of anti-PD-1 treated (without prior anti-CTLA4  
803 treatment, Schadendorf cohort) patients with high versus low BRD4 expression (split by median).  
804 The log-rank (Mantel-Cox) *p* value was used to assess the significance of difference in survival.

805 **D.** Scatter plot showing the positive correlation between BRD4 and PD-L1 expression in  
806 Schadendorf cohort (Spearman's rank test).

807 **E.** Top: Schematic for mouse treatments. Bottom: Tumor growth curves for mice in 4 treatment  
808 categories: 1) IgG alone (100 µg/mouse), 2) anti-PD-1 antibody (100 µg/mouse), 3) bromodomain  
809 inhibitor iBET-762 (7.5 mg/kg) with IgG, or 4) iBET-762 with anti-PD-1 in B16-F10 cells.

810 **F.** Tumor growth curves for BP cells derived from Bosenberg's model (Tyr-Cre<sup>ERT2</sup>, BRAF<sup>V600E</sup>,  
811 PTEN<sup>L/L</sup>) upon treatment with the 4 different strategies shown in panel **E**.

812 **G.** Graph showing the flow cytometry analysis results of infiltrated CD8+ T-cell percentages in  
813 tumors derived from experiment shown in panel **E**.

814 **H.** Scatter plot showing the negative correlation between BRD4 expression (Log<sub>2</sub>TPM where TPM  
815 represents Transcripts per Million) and TIL infiltration score in TCGA melanoma cohort.

816 **I.** Percentage of cleaved caspase-3 positive STC2765 cells post co-culture with autologous  
817 TIL2765 at 3 different ratios effector:target ratio (1:1, 3:1 and 5:1) when melanoma cells were  
818 treated with mock or iBET-762 (1µM) for 72 hrs.

819 In **(A)**, **(G)** and **(I)** box plots, the bottom and the top of the rectangles indicate the first quartile (Q1)  
820 and third quartile (Q3), respectively. The horizontal lines in the middle signify the median (Q2),  
821 and the vertical lines that extend from the top and the bottom of the plot indicate the maximum  
822 and minimum values, respectively.

823 **Figure 6: Molecular mechanism behind BRDi plus anti-PD-1 response.**

824 **A.** Dot plot showing significantly activated (left) and suppressed (right) pathways for differentially  
825 expressed genes in iBET-762 + anti-PD-1 treated tumors in comparison to anti-PD-1 treated ones.

826 Dot size represents gene ratio, and colors represents adjusted p-values.

827 **B.** IGV snapshot of aggregate BRD4 profiles around genes in c-MET, TGF $\beta$ 3, VEGFC and  
828 PTGES2 in two different tumors belonging to the 4 treatment groups shown in **Fig. 5E**. Highlighted  
829 regions show loss of BRD4 peaks in iBET-762 + anti-PD-1 combination treatment samples  
830 compared to other treatment groups.

831 **C.** Box plot for mRNA expression level ( $\text{Log}_2\text{TPM} + 1$ ) of genes shown in panel **B**. Each dot  
832 represents single sample. Colors represent 4 treatment groups shown in the plot. Bottom and top  
833 of the rectangles indicate the first quartile (Q1) and third quartile (Q3), respectively. The horizontal  
834 lines in the middle signify the median (Q2), and the vertical lines that extend from the top and the  
835 bottom of the plot indicate the maximum and minimum values, respectively.

836 **D.** Top: Venn diagram showing the schematic of our approach to integrate mouse and human  
837 data. Bottom: Heatmaps for BRD4 and H3K27ac ChIP-Seq signal around differentially expressed  
838 genes overlapping between those in iBET-762 + anti-PD-1 versus IgG treated tumors and  
839 replicated non-responder-specific enhancers annotated genes.

840 **E.** Pathway analysis (Hallmark) of 107 genes from human and mouse data overlap shown in panel

841 **D.** Dot size represents gene ratio, and colors represents adjusted p-values.

842 **SUPPLEMENTARY FIGURE LEGENDS**

843 **Figure S1: Chromatin state differences between anti-PD-1 responders and non-**  
844 **responders.**

845 **A-B.** Kaplan-miere curve showing progression-free survival (**A**) and overall survival (**B**) for  
846 responders and non-responders to anti-PD-1 therapy in melanoma (MDACC cohort). The log-  
847 rank (Mantel-Cox) p value is shown for the difference in survival.

848 **C.** IGV view of 6 different histone mark profiles (as noted on the right side) on the shown  
849 chromosomal region in all the anti-PD-1–treated patients.

850 **D.** Genomic annotation enrichments for each chromatin state in anti-PD-1 non-responder (top)  
851 and responder (bottom) tumor samples.

852 **E.** Box plots showing the log<sub>2</sub> mean expression levels (Transcripts Per Million, TPM) of genes  
853 associated with enhancer state E7. Genes were linked using H3K27ac HiChIP data from  
854 STC2765 melanoma cell lines and FANTOM data as described in the methods section. The  
855 bottom and the top of the rectangles indicate the first quartile (Q1) and third quartile (Q3),  
856 respectively. The horizontal lines in the middle signify the median (Q2), and the vertical lines that  
857 extend from the top and the bottom of the plot indicate the maximum and minimum values,  
858 respectively.

859 **F.** Average intensity plots for H3K27ac (left) and H3K27me3 (right) on loci that lost H3K27ac  
860 marks (from **Fig. 1E**) in pre-treatment R versus NR tumors from MDACC cohort.

861 **G.** Heatmap of chromatin state intensities for 20,194 loci that showed a switch from E7 (yellow)  
862 in responder pre-treatment samples (right) to any other state in non-responder pre-treatment  
863 samples (left), as shown by colors for each state.

864 **H.** Dot plot showing the pathways in genes targeted by E7 state enhancers that were significantly  
865 enriched in responders compared to non-responders. Dot size represents the gene counts;  
866 adjusted p-values are shown and are color-coded based on the level of significance.

867 **Figure S2: Validation of enhancer signature between MDA and MGH cohorts.**

868 **A.** Bar chart showing number of peaks in individual samples from MDACC cohort that pass quality  
869 threshold of  $M\text{-value} > 0$  and  $M\text{Anorm } p > 0.1$ .

870 **B.** Bar chart showing number of peaks in individual samples from MGH cohort that pass quality  
871 threshold of  $M\text{-value} > 0$  and  $M\text{Anorm } p > 0.1$ .

872 **C.** Functional enrichments for the 84,317 peaks passing the IDR threshold.

873 **D.** QQ-plot between MGH (x-axis) and MDACC (y-axis) sample quantiles from the pre-treatment  
874 (PRE) comparison.

875 **E.** QQ-plot between MGH (x-axis) and MDACC (y-axis) sample quantiles from the on-treatment  
876 (ON) comparison.

877 **F.** Receiver operating characteristic (ROC) of random forest trained predictive models utilizing the  
878 437 replicated pre-treatment peaks. The ROC curve was formed by concatenating predictions  
879 from 2 models: a model trained exclusively on MGH data and tested on MDACC data, and a  
880 model trained exclusively on MDACC data and tested on MGH data.

881 **G.** Receiver operating characteristic (ROC) of random forest trained predictive models using  
882 replicated ChIP-seq peaks or RNA-seq genes across  $N=22$  pre-treatment ChIP-seq samples and  
883  $N=26$  pre-treatment RNA-seq samples. The features within each cross-validation fold were  
884 determined by finding the set of replicated peaks or genes across the MDACC and MGH cohorts  
885 by computing the set of intersecting peaks or genes that were nominally significant in both the  
886 MDACC & MGH cohorts in the training cohort. We analyzed a total of 23,457 RNA-seq genes and  
887 84,317 ChIP-seq peaks. This was used to train a random forest within each training set with  $K=5$   
888 to  $K=20$  trees, the reported the ROC & auROCs are derived from the best performing random  
889 forest classifier. The ROC curve and auROC was formed by concatenating predictions from the  
890  $N=10$  ChIP-seq and  $N=8$  RNA-seq shared samples (samples with both RNA-seq and ChIP-seq  
891 from the pre-treatment timepoint) across cross validation folds.

892 **H.** Comparison of observed LOO CV auROC and literature auROC across melanoma checkpoint  
893 blockade response prediction studies.

894 **I.** Box plots showing Tumor Mutational Burden (TMB) in all responder vs non-responder patients  
895 (top), in pre- or post-treatment responder vs non-responder patients (bottom). The bottom and  
896 the top of the rectangles indicate the first quartile (Q1) and third quartile (Q3), respectively. The  
897 horizontal lines in the middle signify the median (Q2), and the vertical lines that extend from the  
898 top and the bottom of the plot indicate the maximum and minimum values, respectively.

899 **J.** Effect of TMB as a predictive feature for pre-treatment response prediction in the MDACC  
900 cohort. Here we evaluate two alternative models for predicting pre-treatment outcomes using  
901 ChIP-seq data in the MDACC cohort. In LOO-CV across N=13 MDACC samples with both ChIP-  
902 seq and TMB data, we observed incorporating TMB data along with differential ChIP-seq peaks  
903 (AUC=0.7143) as features to a random forest classifier with K=20 trees resulted in a slightly  
904 increased AUC compared to only using differential ChIP-seq peaks alone (AUC=0.6905).

905 **K.** Kaplan-Meier plots showing progression-free survival in MDACC (left) or MGH (right) cohorts  
906 for 3 out of the 32 peaks which offered better prognosis as a result of increased peak signal. The  
907 normalized ChIP activity values were studentized across the MDACC cohort, then the median  
908 value was used to determine the high-activity vs. low-activity groups. There was a total of 8  
909 patients (4 low enhancer activity, 4 high enhancer activity) in the MGH group and a total of 14  
910 patients (7 low enhancer activity, 7 high enhancer activity) in the MDACC group. The peaks were  
911 selected using a p=0.05 cutoff for the Cox proportional hazards test.

912 **Figure S3: Differences in enhancer activation on specific groups of genes between non-**  
913 **responders and responders to anti-PD-1.**

914 **A.** IGV snapshot of aggregate H3K27ac profiles around NOTCH1, AKT1, USP22, MITF and c-  
915 MYC in NR and R samples from both cohorts as well as isolated melanoma STCs or TILs. The  
916 red line loops in all panels in this figure depict E-P interactions identified from H3K27ac HiChIP  
917 data from STC2765 cells and/or previously predicted E-P networks (Cao et al., 2017).

918 **B.** IGV snapshot of aggregate H3K27ac profiles around CXCL9 and CXCL13 in NR and R  
919 samples from both cohorts as well as isolated melanoma STCs or TILs .

920 **C-E.** IGV snapshot of aggregate H3K27ac profiles around TGF $\beta$ 3, TGF $\beta$ R3, BMPR2, VEGFC,  
921 ANGPT2, VEGFB, PIK3CA, MTOR, RICTOR, FGF2, PDGFC and PTGES2 in NR and R samples  
922 from both cohorts as well as isolated melanoma STCs or TILs.

923 **F.** IGV snapshot of aggregate H3K27ac profiles around TGF $\beta$ 2, XIST, SPATA2, RFPL2, and  
924 MAMDC2 in MGH cohort NR samples, R samples, isolated melanoma STCs, or isolated TILs.

925 **G.** IGV snapshot of aggregate H3K27ac profiles around FAM20C, LARP1B and LGALSL in NR  
926 and R samples from both cohorts as well as isolated melanoma STCs or TILs.

927 **H.** Volcano plot showing MDACC and MGH cohort combined expression data differentially  
928 expressed genes (blue and red) in responder vs non-responders. X-axis shows log fold change  
929 (FC), and y-axis represents p-value of gene expression change.

930 **I.** Box plot showing the gene expression level of LGALSL and LARP1B genes in non-responder  
931 and responder pre-treatment samples. In the box plot, the bottom and the top of the rectangles  
932 indicate the first quartile (Q1) and third quartile (Q3), respectively. The horizontal lines in the  
933 middle signify the median (Q2), and the vertical lines that extend from the top and the bottom of  
934 the plot indicate the maximum and minimum values, respectively.

935 **Figure S4: Gene targets of activated enhancers in anti-PD-1 non-responders.**

936 **A.** IGV snapshot of aggregate H3K27ac profiles around CD48, LAG-3, and BTLA in NR and R  
937 samples from both cohorts as well as isolated melanoma STCs or TILs. The red line loops in all  
938 panels in this figure depict E-P interactions identified from H3K27ac HiChIP data from STC2765  
939 cells and/or previously predicted E-P networks (Cao et al., 2017).

940 **B.** Schematic showing the key immune checkpoint receptors on exhausted TILs.

941 **C-D.** IGV snapshot of aggregate H3K27ac profiles around CEACAM1, HVEM, NR4A1 and CD244  
942 (**C**); and FKBP3, CEBPB, and KLF6 (**D**) in NR and R samples from both cohorts as well as isolated  
943 melanoma STCs or TILs.

944 **E.** IGV snapshot of aggregate H3K27ac profiles around c-MET in NR and R samples from MGH  
945 cohort as well as isolated melanoma STCs or TILs.

946 **F.** Volcano plot showing MDACC cohort differentially expressed genes (gray dots) and  
947 differentially enriched enhancers targeted genes (red or blue) in R vs. NR samples. X-axis shows  
948 log<sub>2</sub> fold change, and y-axis represents p-value of gene expression change.

949 **G.** Distribution of expression of S100B, MITF, and MET genes in 2-dimensional embedding  
950 obtained by tSNE. Data were extracted from melanoma single-cell RNA-seq data (Tirosh et al.,  
951 2016). Each cell is colored according to the gene expression level.



952 **Figure S5: Chromatin state transitions during non-response to immunotherapy.**

953 **A.** Circos plot showing chromatin state switches between pre-treatment and post-treatment  
954 samples from responders (left) or non-responders (right). Chromatin state transitions were  
955 calculated based on epilogs (see Methods). Yellow color bands show high percentage of active  
956 enhancer state E7 transitioning to low or repressed states E12 or E11.

957 **B.** Heatmap of chromatin state intensities for 31,155 loci that show switch from E7 in NR pre-  
958 treatment samples to any other state in R pre-treatment, NR post-treatment, or R post-treatment  
959 samples as shown by colors for each state. Y-axis shows the clusters (numbered one through  
960 seven) of genomic loci that follow specific transition patterns.

961 **C-D.** Dot plot representation of significantly enriched pathways in gene targets of enhancers  
962 present in Cluster 1 (**C**) and Cluster 4 (**D**) from panel **B**. Dot size represents the gene counts.  
963 Adjusted p-values are color-coded based on the level of significance.

964 **E-F.** IGV snapshot of aggregate H3K27ac profiles around VEGFA, RUNX3, and AKT2 (**E**) and  
965 LOXL4, VIM, and MTOR (**F**) in NR and R samples from both cohorts as well as isolated melanoma  
966 STCs or TILs. Highlighted regions depict specific enrichment of H3K27Ac enhancer peaks in NR  
967 pre-treatment (**E**) or post-treatment (**F**) samples. The red line loops in all panels in this figure  
968 depict E-P interactions identified from H3K27ac HiChIP data from STC2765 cells and/or  
969 previously predicted E-P networks (Cao et al., 2017).

970 **Figure S6: Molecular mechanism behind combination treatment of bromodomain**  
971 **inhibitors plus anti-PD-1.**

972 **A.** Kaplan-miere curve showing progression-free survival in two groups of patients: one bearing  
973 high levels of BRD2, BRD3 and BRD4 expression, and second bearing low levels of these BRD  
974 proteins in Schadendorf cohort of anti-PD-1 treated patients .

975 **B.** Graph showing the flow cytometry analysis results of infiltrated CD8+ T-cell percentages in  
976 tumors derived from experiment shown in **Fig.5F**.

977 **C.** Scatter plot showing the correlation between BRD4 expression and TIL infiltration in the TCGA  
978 melanoma cohort.

979 **D.** Bar graph showing MHC class I expression in STC2765 cells which were untreated or treated  
980 with DMSO or iBET-762 (1 $\mu$ M, 72 hours) alone or along with IFN- $\gamma$ .

981 **E.** Average intensity curves of ChIP-Seq reads (RPKM) for H3K27ac in tumors treated with IgG,  
982  $\alpha$ -PD-1, IgG + iBET-762 or  $\alpha$ -PD-1 + iBET-762 (corresponding to experiment shown in **Fig. 5E**)  
983 at all enhancer regions. Enhancers are shown in a 10kb window centered on the middle of the  
984 locus.

985 **F.** IGV snapshot of H3K27Ac ChIP-seq signal around c-MET, TGF $\beta$ 3, VEGFC and PTGES2 gene  
986 loci in tumors treated with IgG,  $\alpha$ -PD-1, IgG + iBET-762 or  $\alpha$ -PD-1 + iBET-762.

987 **G-I.** IGV snapshot of aggregate BRD4 and H3K27ac (left) profiles around TGF $\beta$ R3, BMPR2,  
988 VEGFB, ANG2, ANGPT2, FGF2, AKT1, MTOR, RICTOR and PIK3CA in in tumors treated with  
989 IgG,  $\alpha$ -PD-1, IgG + iBET-762 or  $\alpha$ -PD-1 + iBET-762. Box plot (right) shows mRNA expression of  
990 genes shown in panels **F-H** (left). Each dot represents a sample. Colors represent 4 treatment  
991 groups shown in the plot. In the box plot, the bottom and the top of the rectangles indicate the first  
992 quartile (Q1) and third quartile (Q3), respectively. The horizontal lines in the middle signify the  
993 median (Q2), and the vertical lines that extend from the top and the bottom of the plot indicate the  
994 maximum and minimum values, respectively.

995 **J.** IGV snapshot of aggregate BRD4 (top) and H3K27ac (bottom) profiles around LAG3, BTLA,  
996 CEACAM1 and NR4A1 in in tumors treated with IgG,  $\alpha$ -PD-1, IgG + iBET-762 or  $\alpha$ -PD-1 + iBET-  
997 762.

998 **K.** Left, IGV snapshot of aggregate BRD4 (top) and H3K27ac (bottom) profiles around CXCL9  
999 and CXCL13 in tumors treated with IgG,  $\alpha$ -PD-1, IgG + iBET-762 or  $\alpha$ -PD-1 + iBET-762. Right,  
1000 box plot representation of the mRNA expression level of CXCL9 and CXCL13. Each dot  
1001 represents a sample. Colors represent 4 treatment groups shown in the plot. In the box plot, the  
1002 bottom and the top of the rectangles indicate the first quartile (Q1) and third quartile (Q3),  
1003 respectively. The horizontal lines in the middle signify the median (Q2), and the vertical lines that  
1004 extend from the top and the bottom of the plot indicate the maximum and minimum values,  
1005 respectively.

1006 **L.** Pathway network analysis for 107 genes from Fig. 6D-E obtained from overlap of human and  
1007 mouse data.

1008 **SUPPLEMENTARY TABLES**

1009 **Table S1.** Details of the patient samples utilized in this study and quality matrix of the generated  
1010 chromatin data.

1011 **Table S2.** List of significantly differentially enriched peaks and differentially expressed genes  
1012 between responder and non-responder pre-treatment samples in MDACC and MGH cohorts as  
1013 well as replicated peaks with annotation.

1014 **Table S3.** List of H3K27ac peaks that are derived from overlap of replicated NR-specific and R-  
1015 specific enhancers with tumor-specific or TIL-specific enhancers.

1016 **Table S4.** List of active enhancer regions in cluster 1 and cluster 4 derived during analysis of  
1017 chromatin state transitions between pre-treatment to post-treatment samples.

1018 **Table S5.** List of genomic regions and associated genes that display loss of BRD4 binding and  
1019 reduced expression in tumors treated with iBET-762 plus anti-PD-1 versus IgG.

1020 **Table S6.** List of gRNAs used in the enhancer editing experiment shown in Figure 4.

1021

1022 **REFERENCES**

- 1023 Auslander, N., Zhang, G., Lee, J.S., Frederick, D.T., Miao, B., Moll, T., Tian, T., Wei, Z., Madan,  
1024 S., Sullivan, R.J., *et al.* (2018). Robust prediction of response to immune checkpoint blockade  
1025 therapy in metastatic melanoma. *Nature medicine* 24, 1545-1549.
- 1026
- 1027 Barski, A., Cuddapah, S., Cui, K., Roh, T.Y., Schones, D.E., Wang, Z., Wei, G., Chepelev, I., and  
1028 Zhao, K. (2007). High-resolution profiling of histone methylations in the human genome. *Cell*  
1029 129, 823-837.
- 1030
- 1031 Battle, E., and Massague, J. (2019). Transforming Growth Factor-beta Signaling in Immunity and  
1032 Cancer. *Immunity* 50, 924-940.
- 1033
- 1034 Bernstein, B.E., Stamatoyannopoulos, J.A., Costello, J.F., Ren, B., Milosavljevic, A., Meissner,  
1035 A., Kellis, M., Marra, M.A., Beaudet, A.L., Ecker, J.R., *et al.* (2010). The NIH Roadmap  
1036 Epigenomics Mapping Consortium. *Nature biotechnology* 28, 1045-1048.
- 1037
- 1038 Bhat, P., Leggatt, G., Waterhouse, N., and Frazer, I.H. (2017). Interferon-gamma derived from  
1039 cytotoxic lymphocytes directly enhances their motility and cytotoxicity. *Cell Death Dis* 8, e2836.
- 1040 Blank, C., Gajewski, T.F., and Mackensen, A. (2005). Interaction of PD-L1 on tumor cells with  
1041 PD-1 on tumor-specific T cells as a mechanism of immune evasion: implications for tumor  
1042 immunotherapy. *Cancer Immunol Immunother* 54, 307-314.
- 1043
- 1044 Brahmer, J.R., Tykodi, S.S., Chow, L.Q., Hwu, W.J., Topalian, S.L., Hwu, P., Drake, C.G.,  
1045 Camacho, L.H., Kauh, J., Odunsi, K., *et al.* (2012). Safety and activity of anti-PD-L1 antibody in  
1046 patients with advanced cancer. *The New England journal of medicine* 366, 2455-2465.
- 1047
- 1048 Cao, Q., Anyansi, C., Hu, X., Xu, L., Xiong, L., Tang, W., Mok, M.T.S., Cheng, C., Fan, X.,  
1049 Gerstein, M., *et al.* (2017). Reconstruction of enhancer-target networks in 935 samples of human  
1050 primary cells, tissues and cell lines. *Nature genetics* 49, 1428-1436.
- 1051
- 1052 Casey, S.C., Tong, L., Li, Y., Do, R., Walz, S., Fitzgerald, K.N., Gouw, A.M., Baylot, V.,  
1053 Gutgemann, I., Eilers, M., *et al.* (2016). MYC regulates the antitumor immune response through  
1054 CD47 and PD-L1. *Science* 352, 227-231.
- 1055
- 1056 Chandrashekar, D.S., Bashel, B., Balasubramanya, S.A.H., Creighton, C.J., Ponce-Rodriguez, I.,  
1057 Chakravarthi, B., and Varambally, S. (2017). UALCAN: A Portal for Facilitating Tumor Subgroup  
1058 Gene Expression and Survival Analyses. *Neoplasia* 19, 649-658.
- 1059
- 1060 Chen, J., Lopez-Moyado, I.F., Seo, H., Lio, C.J., Hempleman, L.J., Sekiya, T., Yoshimura, A.,  
1061 Scott-Browne, J.P., and Rao, A. (2019). NR4A transcription factors limit CAR T cell function in  
1062 solid tumours. *Nature* 567, 530-534.
- 1063
- 1064 Consortium, E.P., Bernstein, B.E., Birney, E., Dunham, I., Green, E.D., Gunter, C., and Snyder,  
1065 M. (2012). An integrated encyclopedia of DNA elements in the human genome. *Nature* 489, 57-  
1066 74.

- 1067 Dankort, D., Curley, D.P., Carlidge, R.A., Nelson, B., Karnezis, A.N., Damsky, W.E., Jr., You,  
1068 M.J., DePinho, R.A., McMahon, M., and Bosenberg, M. (2009). Braf(V600E) cooperates with  
1069 Pten loss to induce metastatic melanoma. *Nature genetics* *41*, 544-552.  
1070
- 1071 Dobin, A., Davis, C.A., Schlesinger, F., Drenkow, J., Zaleski, C., Jha, S., Batut, P., Chaisson, M.,  
1072 and Gingeras, T.R. (2013). STAR: ultrafast universal RNA-seq aligner. *Bioinformatics* *29*, 15-21.  
1073 Ernst, J., and Kellis, M. (2012). ChromHMM: automating chromatin-state discovery and  
1074 characterization. *Nature methods* *9*, 215-216.  
1075
- 1076 Fukumura, D., Kloepper, J., Amoozgar, Z., Duda, D.G., and Jain, R.K. (2018). Enhancing cancer  
1077 immunotherapy using antiangiogenics: opportunities and challenges. *Nat Rev Clin Oncol* *15*, 325-  
1078 340.  
1079
- 1080 Gao, J., Shi, L.Z., Zhao, H., Chen, J., Xiong, L., He, Q., Chen, T., Roszik, J., Bernatchez, C.,  
1081 Woodman, S.E., *et al.* (2016). Loss of IFN-gamma Pathway Genes in Tumor Cells as a Mechanism  
1082 of Resistance to Anti-CTLA-4 Therapy. *Cell* *167*, 397-404 e399.  
1083
- 1084 Garber, M., Yosef, N., Goren, A., Raychowdhury, R., Thielke, A., Guttman, M., Robinson, J.,  
1085 Minie, B., Chevrier, N., Itzhaki, Z., *et al.* (2012). A high-throughput chromatin  
1086 immunoprecipitation approach reveals principles of dynamic gene regulation in mammals.  
1087 *Molecular cell* *47*, 810-822.  
1088
- 1089 Garcia-Lora, A., Algarra, I., and Garrido, F. (2003). MHC Class I Antigens, Immune  
1090 Surveillance, and Tumor Immune Escape. *J Cell Physiol* *195*, 346-355.  
1091
- 1092 Goodman, A.M., Kato, S., Bazhenova, L., Patel, S.P., Frampton, G.M., Miller, V., Stephens, P.J.,  
1093 Daniels, G.A., and Kurzrock, R. (2017). Tumor Mutational Burden as an Independent Predictor of  
1094 Response to Immunotherapy in Diverse Cancers. *Mol Cancer Ther* *16*, 2598-2608.  
1095
- 1096 Gu, Z., Eils, R., and Schlesner, M. (2016). Complex heatmaps reveal patterns and correlations in  
1097 multidimensional genomic data. *Bioinformatics* *32*, 2847-2849.  
1098
- 1099 Gu, Z., Eils, R., Schlesner, M., and Ishaque, N. (2018). EnrichedHeatmap: an R/Bioconductor  
1100 package for comprehensive visualization of genomic signal associations. *BMC Genomics* *19*, 234.  
1101 Heinz, S., Benner, C., Spann, N., Bertolino, E., Lin, Y.C., Laslo, P., Cheng, J.X., Murre, C., Singh,  
1102 H., and Glass, C.K. (2010). Simple combinations of lineage-determining transcription factors  
1103 prime cis-regulatory elements required for macrophage and B cell identities. *Molecular cell* *38*,  
1104 576-589.  
1105
- 1106 Hodi, F.S., O'Day, S.J., McDermott, D.F., Weber, R.W., Sosman, J.A., Haanen, J.B., Gonzalez,  
1107 R., Robert, C., Schadendorf, D., Hassel, J.C., *et al.* (2010). Improved survival with ipilimumab in  
1108 patients with metastatic melanoma. *The New England journal of medicine* *363*, 711-723.  
1109
- 1110 Huang, Y.H., Zhu, C., Kondo, Y., Anderson, A.C., Gandhi, A., Russell, A., Dougan, S.K.,  
1111 Petersen, B.S., Melum, E., Pertel, T., *et al.* (2015). CEACAM1 regulates TIM-3-mediated  
1112 tolerance and exhaustion. *Nature* *517*, 386-390.

- 1113 Jing, X., Shao, S., Zhang, Y., Luo, A., Zhao, L., Zhang, L., Gu, S., and Zhao, X. (2020). BRD4  
1114 inhibition suppresses PD-L1 expression in triple-negative breast cancer. *Exp Cell Res* 392,  
1115 112034.  
1116
- 1117 Johannet, P., Coudray, N., Donnelly, D.M., Jour, G., Illa-Bochaca, I., Xia, Y., Johnson, D.B.,  
1118 Wheless, L., Patrinely, J.R., Nomikou, S., *et al.* (2021). Using Machine Learning Algorithms to  
1119 Predict Immunotherapy Response in Patients with Advanced Melanoma. *Clinical cancer research*  
1120 : an official journal of the American Association for Cancer Research 27, 131-140.  
1121
- 1122 Joller, N., and Kuchroo, V.K. (2017). Tim-3, Lag-3, and TIGIT. *Curr Top Microbiol Immunol*  
1123 410, 127-156.  
1124
- 1125 Kanno, T., Kanno, Y., LeRoy, G., Campos, E., Sun, H.W., Brooks, S.R., Vahedi, G., Heightman,  
1126 T.D., Garcia, B.A., Reinberg, D., *et al.* (2014). BRD4 assists elongation of both coding and  
1127 enhancer RNAs by interacting with acetylated histones. *Nature structural & molecular biology* 21,  
1128 1047-1057.  
1129
- 1130 Klann, T.S., Black, J.B., Chellappan, M., Safi, A., Song, L., Hilton, I.B., Crawford, G.E., Reddy,  
1131 T.E., and Gersbach, C.A. (2017). CRISPR-Cas9 epigenome editing enables high-throughput  
1132 screening for functional regulatory elements in the human genome. *Nature biotechnology* 35, 561-  
1133 568.  
1134
- 1135 Koster, J., and Rahmann, S. (2012). Snakemake--a scalable bioinformatics workflow engine.  
1136 *Bioinformatics* 28, 2520-2522.  
1137
- 1138 Kwiatkowski, N., Zhang, T., Rahl, P.B., Abraham, B.J., Reddy, J., Ficarro, S.B., Dastur, A.,  
1139 Amzallag, A., Ramaswamy, S., Tesar, B., *et al.* (2014). Targeting transcription regulation in cancer  
1140 with a covalent CDK7 inhibitor. *Nature* 511, 616-620.  
1141
- 1142 Kwon, J., and Bakhroum, S.F. (2020). The Cytosolic DNA-Sensing cGAS-STING Pathway in  
1143 Cancer. *Cancer discovery* 10, 26-39.  
1144
- 1145 Langmead, B., Trapnell, C., Pop, M., and Salzberg, S.L. (2009). Ultrafast and memory-efficient  
1146 alignment of short DNA sequences to the human genome. *Genome biology* 10, R25.  
1147
- 1148 Lareau, C.A., and Aryee, M.J. (2018). hichipper: a preprocessing pipeline for calling DNA loops  
1149 from HiChIP data. *Nature methods* 15, 155-156.  
1150
- 1151 Lee, H., Park, B.C., Soon Kang, J., Cheon, Y., Lee, S., and Jae Maeng, P. (2020). MAM domain  
1152 containing 2 is a potential breast cancer biomarker that exhibits tumour-suppressive activity. *Cell*  
1153 *Prolif* 53, e12883.  
1154
- 1155 Lee, T.I., and Young, R.A. (2013). Transcriptional regulation and its misregulation in disease. *Cell*  
1156 152, 1237-1251.

- 1157 Leek, J.T., Johnson, W.E., Parker, H.S., Jaffe, A.E., and Storey, J.D. (2012). The sva package for  
1158 removing batch effects and other unwanted variation in high-throughput experiments.  
1159 *Bioinformatics* 28, 882-883.
- 1160
- 1161 Li, J., Yuan, S., Norgard, R.J., Yan, F., Yamazoe, T., Blanco, A., and Stanger, B.Z. (2020). Tumor  
1162 Cell-Intrinsic USP22 Suppresses Antitumor Immunity in Pancreatic Cancer. *Cancer immunology  
1163 research* 8, 282-291.
- 1164
- 1165 Liao, Y., Smyth, G.K., and Shi, W. (2014). featureCounts: an efficient general purpose program  
1166 for assigning sequence reads to genomic features. *Bioinformatics* 30, 923-930.
- 1167
- 1168 Liaw, A., and Wiener, M. (2002). Classification and Regression by randomForest. *R News* 2, 18-  
1169 22.
- 1170
- 1171 Litchfield, K., Reading, J.L., Puttick, C., Thakkar, K., Abbosh, C., Bentham, R., Watkins, T.B.K.,  
1172 Rosenthal, R., Biswas, D., Rowan, A., *et al.* (2021). Meta-analysis of tumor- and T cell-intrinsic  
1173 mechanisms of sensitization to checkpoint inhibition. *Cell* 184, 596-614 e514.
- 1174
- 1175 Liu, D., Schilling, B., Liu, D., Sucker, A., Livingstone, E., Jerby-Arnon, L., Zimmer, L., Gutzmer,  
1176 R., Satzger, I., Loquai, C., *et al.* (2019). Integrative molecular and clinical modeling of clinical  
1177 outcomes to PD1 blockade in patients with metastatic melanoma. *Nature medicine* 25, 1916-1927.
- 1178 Love, M.I., Huber, W., and Anders, S. (2014). Moderated estimation of fold change and dispersion  
1179 for RNA-seq data with DESeq2. *Genome biology* 15, 550.
- 1180
- 1181 Loven, J., Hoke, H.A., Lin, C.Y., Lau, A., Orlando, D.A., Vakoc, C.R., Bradner, J.E., Lee, T.I.,  
1182 and Young, R.A. (2013). Selective inhibition of tumor oncogenes by disruption of super-  
1183 enhancers. *Cell* 153, 320-334.
- 1184
- 1185 Luke, J.J., Bao, R., Sweis, R.F., Spranger, S., and Gajewski, T.F. (2019). WNT/beta-catenin  
1186 Pathway Activation Correlates with Immune Exclusion across Human Cancers. *Clinical cancer  
1187 research : an official journal of the American Association for Cancer Research* 25, 3074-3083.
- 1188
- 1189 Maitituoheti, M., Keung, E.Z., Tang, M., Yan, L., Alam, H., Han, G., Singh, A.K., Raman, A.T.,  
1190 Terranova, C., Sarkar, S., *et al.* (2020). Enhancer Reprogramming Confers Dependence on  
1191 Glycolysis and IGF Signaling in KMT2D Mutant Melanoma. *Cell Rep* 33, 108293.
- 1192
- 1193 Mariathasan, S., Turley, S.J., Nickles, D., Castiglioni, A., Yuen, K., Wang, Y., Kadel, E.E., III,  
1194 Koeppen, H., Astarita, J.L., Cubas, R., *et al.* (2018). TGFbeta attenuates tumour response to PD-  
1195 L1 blockade by contributing to exclusion of T cells. *Nature* 554, 544-548.
- 1196
- 1197 Meurette, O., and Mehlen, P. (2018). Notch Signaling in the Tumor Microenvironment. *Cancer  
1198 cell* 34, 536-548.
- 1199
- 1200 Morales, F., and Giordano, A. (2016). Overview of CDK9 as a target in cancer research. *Cell cycle  
1201* 15, 519-527.



- 1202 Mulero-Navarro, S., and Esteller, M. (2008). Epigenetic biomarkers for human cancer: the time is  
1203 now. *Crit Rev Oncol Hematol* 68, 1-11.
- 1204
- 1205 Mumbach, M.R., Rubin, A.J., Flynn, R.A., Dai, C., Khavari, P.A., Greenleaf, W.J., and Chang,  
1206 H.Y. (2016). HiChIP: efficient and sensitive analysis of protein-directed genome architecture.  
1207 *Nature methods* 13, 919-922.
- 1208
- 1209 Palmer, D.C., Guittard, G.C., Franco, Z., Crompton, J.G., Eil, R.L., Patel, S.J., Ji, Y., Van Panhuys,  
1210 N., Klebanoff, C.A., Sukumar, M., *et al.* (2015). Cish actively silences TCR signaling in CD8+ T  
1211 cells to maintain tumor tolerance. *J Exp Med* 212, 2095-2113.
- 1212
- 1213 Papaccio, F., Della Corte, C.M., Viscardi, G., Di Liello, R., Esposito, G., Sparano, F., Ciardiello,  
1214 F., and Morgillo, F. (2018). HGF/MET and the Immune System: Relevance for Cancer  
1215 Immunotherapy. *Int J Mol Sci* 19.
- 1216
- 1217 Peng, D., Kryczek, I., Nagarsheth, N., Zhao, L., Wei, S., Wang, W., Sun, Y., Zhao, E., Vatan, L.,  
1218 Szeliga, W., *et al.* (2015). Epigenetic silencing of TH1-type chemokines shapes tumour immunity  
1219 and immunotherapy. *Nature* 527, 249-253.
- 1220
- 1221 Peng, W., Chen, J.Q., Liu, C., Malu, S., Creasy, C., Tetzlaff, M.T., Xu, C., McKenzie, J.A., Zhang,  
1222 C., Liang, X., *et al.* (2016). Loss of PTEN Promotes Resistance to T Cell-Mediated  
1223 Immunotherapy. *Cancer discovery* 6, 202-216.
- 1224
- 1225 Postow, M.A., Chesney, J., Pavlick, A.C., Robert, C., Grossmann, K., McDermott, D., Linette,  
1226 G.P., Meyer, N., Giguere, J.K., Agarwala, S.S., *et al.* (2015). Nivolumab and Ipilimumab versus  
1227 Ipilimumab in Untreated Melanoma. *The New England journal of medicine*.
- 1228
- 1229 Rai, K., Akdemir, K.C., Kwong, L.N., Fiziev, P., Wu, C.J., Keung, E.Z., Sharma, S., Samant, N.S.,  
1230 Williams, M., Axelrad, J.B., *et al.* (2015). Dual Roles of RNF2 in Melanoma Progression. *Cancer*  
1231 *discovery*.
- 1232
- 1233 Ramirez, F., Ryan, D.P., Gruning, B., Bhardwaj, V., Kilpert, F., Richter, A.S., Heyne, S., Dunder,  
1234 F., and Manke, T. (2016). deepTools2: a next generation web server for deep-sequencing data  
1235 analysis. *Nucleic acids research* 44, W160-165.
- 1236
- 1237 Ritchie, M.E., Phipson, B., Wu, D., Hu, Y., Law, C.W., Shi, W., and Smyth, G.K. (2015). limma  
1238 powers differential expression analyses for RNA-sequencing and microarray studies. *Nucleic*  
1239 *acids research* 43, e47.
- 1240
- 1241 Robinson, J.T., Thorvaldsdottir, H., Winckler, W., Guttman, M., Lander, E.S., Getz, G., and  
1242 Mesirov, J.P. (2011). Integrative genomics viewer. *Nature biotechnology* 29, 24-26.
- 1243
- 1244 Rogel, A., Willoughby, J.E., Buchan, S.L., Leonard, H.J., Thirdborough, S.M., and Al-Shamkhani,  
1245 A. (2017). Akt signaling is critical for memory CD8(+) T-cell development and tumor immune  
1246 surveillance. *Proceedings of the National Academy of Sciences of the United States of America*  
1247 114, E1178-E1187.

- 1248 Sachs, M.C. (2017). plotROC: A Tool for Plotting ROC Curves. *J Stat Softw* 79.  
1249
- 1250 Schadendorf, D., Hodi, F.S., Robert, C., Weber, J.S., Margolin, K., Hamid, O., Chen, T.T.,  
1251 Berman, D.M., and Wolchok, J.D. (2013). Pooled analysis of long-term survival data from phase  
1252 II and phase III trials of ipilimumab in metastatic or locally advanced, unresectable melanoma.  
1253 Paper presented at: Eur J Cancer.  
1254
- 1255 Schlicher, L., Wissler, M., Preiss, F., Brauns-Schubert, P., Jakob, C., Dumit, V., Borner, C.,  
1256 Dengjel, J., and Maurer, U. (2016). SPATA2 promotes CYLD activity and regulates TNF-induced  
1257 NF-kappaB signaling and cell death. *EMBO Rep* 17, 1485-1497.  
1258
- 1259 Servant, N., Varoquaux, N., Lajoie, B.R., Viara, E., Chen, C.J., Vert, J.P., Heard, E., Dekker, J.,  
1260 and Barillot, E. (2015). HiC-Pro: an optimized and flexible pipeline for Hi-C data processing.  
1261 *Genome biology* 16, 259.  
1262
- 1263 Shao, Z., Zhang, Y., Yuan, G.C., Orkin, S.H., and Waxman, D.J. (2012). MAnorm: a robust model  
1264 for quantitative comparison of ChIP-Seq data sets. *Genome biology* 13, R16.  
1265
- 1266 Shi, A., Kasumova, G., Michaud, W., Cintolo-Gonzalez, J., Díaz-Martínez, M., Ohmura, J., Mehta,  
1267 A., Chien, I., Frederick, D., Cohen, S., *et al.* (2020). Plasma-derived extracellular vesicle analysis  
1268 and deconvolution enable prediction and tracking of melanoma checkpoint blockade outcome.  
1269 *Science Advances* 6.  
1270
- 1271 Subramanian, A., Tamayo, P., Mootha, V.K., Mukherjee, S., Ebert, B.L., Gillette, M.A.,  
1272 Paulovich, A., Pomeroy, S.L., Golub, T.R., Lander, E.S., *et al.* (2005). Gene set enrichment  
1273 analysis: a knowledge-based approach for interpreting genome-wide expression profiles.  
1274 *Proceedings of the National Academy of Sciences of the United States of America* 102, 15545-  
1275 15550.  
1276
- 1277 Tang, M. (2017a). pyflow-ChIPseq: a snakemake based ChIP-seq pipeline. *Zenodo*.  
1278
- 1279 Tang, M. (2017b). pyflow-RNAseq: a snakemake based RNAseq pipeline. *Zenodo*.  
1280
- 1281 Terranova, C., Tang, M., Orouji, E., Maitituoheti, M., Raman, A., Amin, S., Liu, Z., and Rai, K.  
1282 (2018). An Integrated Platform for Genome-wide Mapping of Chromatin States Using High-  
1283 throughput ChIP-sequencing in Tumor Tissues. *Journal of visualized experiments : JoVE*.  
1284
- 1285 Terranova, C.J., Tang, M., Maitituoheti, M., Raman, A.T., Ghosh, A.K., Schulz, J., Amin, S.B.,  
1286 Orouji, E., Tomczak, K., Sarkar, S., *et al.* (2021). Reprogramming of bivalent chromatin states in  
1287 NRAS mutant melanoma suggests PRC2 inhibition as a therapeutic strategy. *Cell Rep* 36, 109410.  
1288 Terry, S., Savagner, P., Ortiz-Cuaran, S., Mahjoubi, L., Saintigny, P., Thiery, J.P., and Chouaib,  
1289 S. (2017). New insights into the role of EMT in tumor immune escape. *Mol Oncol* 11, 824-846.  
1290
- 1291 Tirosh, I., Izar, B., Prakadan, S.M., Wadsworth, M.H., 2nd, Treacy, D., Trombetta, J.J., Rotem,  
1292 A., Rodman, C., Lian, C., Murphy, G., *et al.* (2016). Dissecting the multicellular ecosystem of  
1293 metastatic melanoma by single-cell RNA-seq. *Science* 352, 189-196.

1294 Topalian, S.L., Hodi, F.S., Brahmer, J.R., Gettinger, S.N., Smith, D.C., McDermott, D.F.,  
1295 Powderly, J.D., Carvajal, R.D., Sosman, J.A., Atkins, M.B., *et al.* (2012). Safety, activity, and  
1296 immune correlates of anti-PD-1 antibody in cancer. *The New England journal of medicine* 366,  
1297 2443-2454.  
1298  
1299 Topalian, S.L., Sznol, M., McDermott, D.F., Kluger, H.M., Carvajal, R.D., Sharfman, W.H.,  
1300 Brahmer, J.R., Lawrence, D.P., Atkins, M.B., Powderly, J.D., *et al.* (2014). Survival, durable  
1301 tumor remission, and long-term safety in patients with advanced melanoma receiving nivolumab.  
1302 *Journal of clinical oncology : official journal of the American Society of Clinical Oncology* 32,  
1303 1020-1030.  
1304  
1305 Trujillo, J.A., Luke, J.J., Zha, Y., Segal, J.P., Ritterhouse, L.L., Spranger, S., Matijevich, K., and  
1306 Gajewski, T.F. (2019). Secondary resistance to immunotherapy associated with beta-catenin  
1307 pathway activation or PTEN loss in metastatic melanoma. *J Immunother Cancer* 7, 295.  
1308  
1309 Wang, G., Chow, R.D., Zhu, L., Bai, Z., Ye, L., Zhang, F., Renauer, P.A., Dong, M.B., Dai, X.,  
1310 Zhang, X., *et al.* (2020). CRISPR-GEMM Pooled Mutagenic Screening Identifies KMT2D as a  
1311 Major Modulator of Immune Checkpoint Blockade. *Cancer discovery* 10, 1912-1933.  
1312  
1313 Watanabe, N., Gavrieli, M., Sedy, J.R., Yang, J., Fallarino, F., Loftin, S.K., Hurchla, M.A.,  
1314 Zimmerman, N., Sim, J., Zang, X., *et al.* (2003). BTLA is a lymphocyte inhibitory receptor with  
1315 similarities to CTLA-4 and PD-1. *Nat Immunol* 4, 670-679.  
1316  
1317 Wherry, E.J., and Kurachi, M. (2015). Molecular and cellular insights into T cell exhaustion. *Nat*  
1318 *Rev Immunol* 15, 486-499.  
1319  
1320 Wiedemann, G.M., Aithal, C., Kraechan, A., Heise, C., Cadilha, B.L., Zhang, J., Duewell, P.,  
1321 Ballotti, R., Endres, S., Bertolotto, C., *et al.* (2019). Microphthalmia-Associated Transcription  
1322 Factor (MITF) Regulates Immune Cell Migration into Melanoma. *Transl Oncol* 12, 350-360.  
1323  
1324 Woods, D.M., Sodre, A.L., Villagra, A., Sarnaik, A., Sotomayor, E.M., and Weber, J. (2015).  
1325 HDAC Inhibition Upregulates PD-1 Ligands in Melanoma and Augments Immunotherapy with  
1326 PD-1 Blockade. *Cancer immunology research* 3, 1375-1385.  
1327  
1328 Xu, R., Tan, H., Zhang, J., Yuan, Z., Xie, Q., and Zhang, L. (2021). Fam20C in Human Diseases:  
1329 Emerging Biological Functions and Therapeutic Implications. *Frontiers in Molecular Biosciences*  
1330 8.  
1331  
1332 Yan, J., Wu, X., Yu, J., Zhu, Y., and Cang, S. (2020). Prognostic Role of Tumor Mutation Burden  
1333 Combined With Immune Infiltrates in Skin Cutaneous Melanoma Based on Multi-Omics Analysis.  
1334 *Front Oncol* 10, 570654.  
1335  
1336 Yu, G. (2019). *enrichplot: Visualization of Functional Enrichment Result*. R package version 161,  
1337 <https://github.com/GuangchuangYu/enrichplot>.  
1338

- 1339 Yu, G., Wang, L.G., Han, Y., and He, Q.Y. (2012). clusterProfiler: an R package for comparing  
1340 biological themes among gene clusters. *OMICS* *16*, 284-287.  
1341
- 1342 Zhang, Y., Liu, T., Meyer, C.A., Eeckhoute, J., Johnson, D.S., Bernstein, B.E., Nusbaum, C.,  
1343 Myers, R.M., Brown, M., Li, W., *et al.* (2008). Model-based analysis of ChIP-Seq (MACS).  
1344 *Genome biology* *9*, R137.  
1345
- 1346 Zhu, H., Bengsch, F., Svoronos, N., Rutkowski, M.R., Bitler, B.G., Allegrezza, M.J., Yokoyama,  
1347 Y., Kossenkov, A.V., Bradner, J.E., Conejo-Garcia, J.R., *et al.* (2016). BET Bromodomain  
1348 Inhibition Promotes Anti-tumor Immunity by Suppressing PD-L1 Expression. *Cell Rep* *16*, 2829-  
1349 2837.

A.

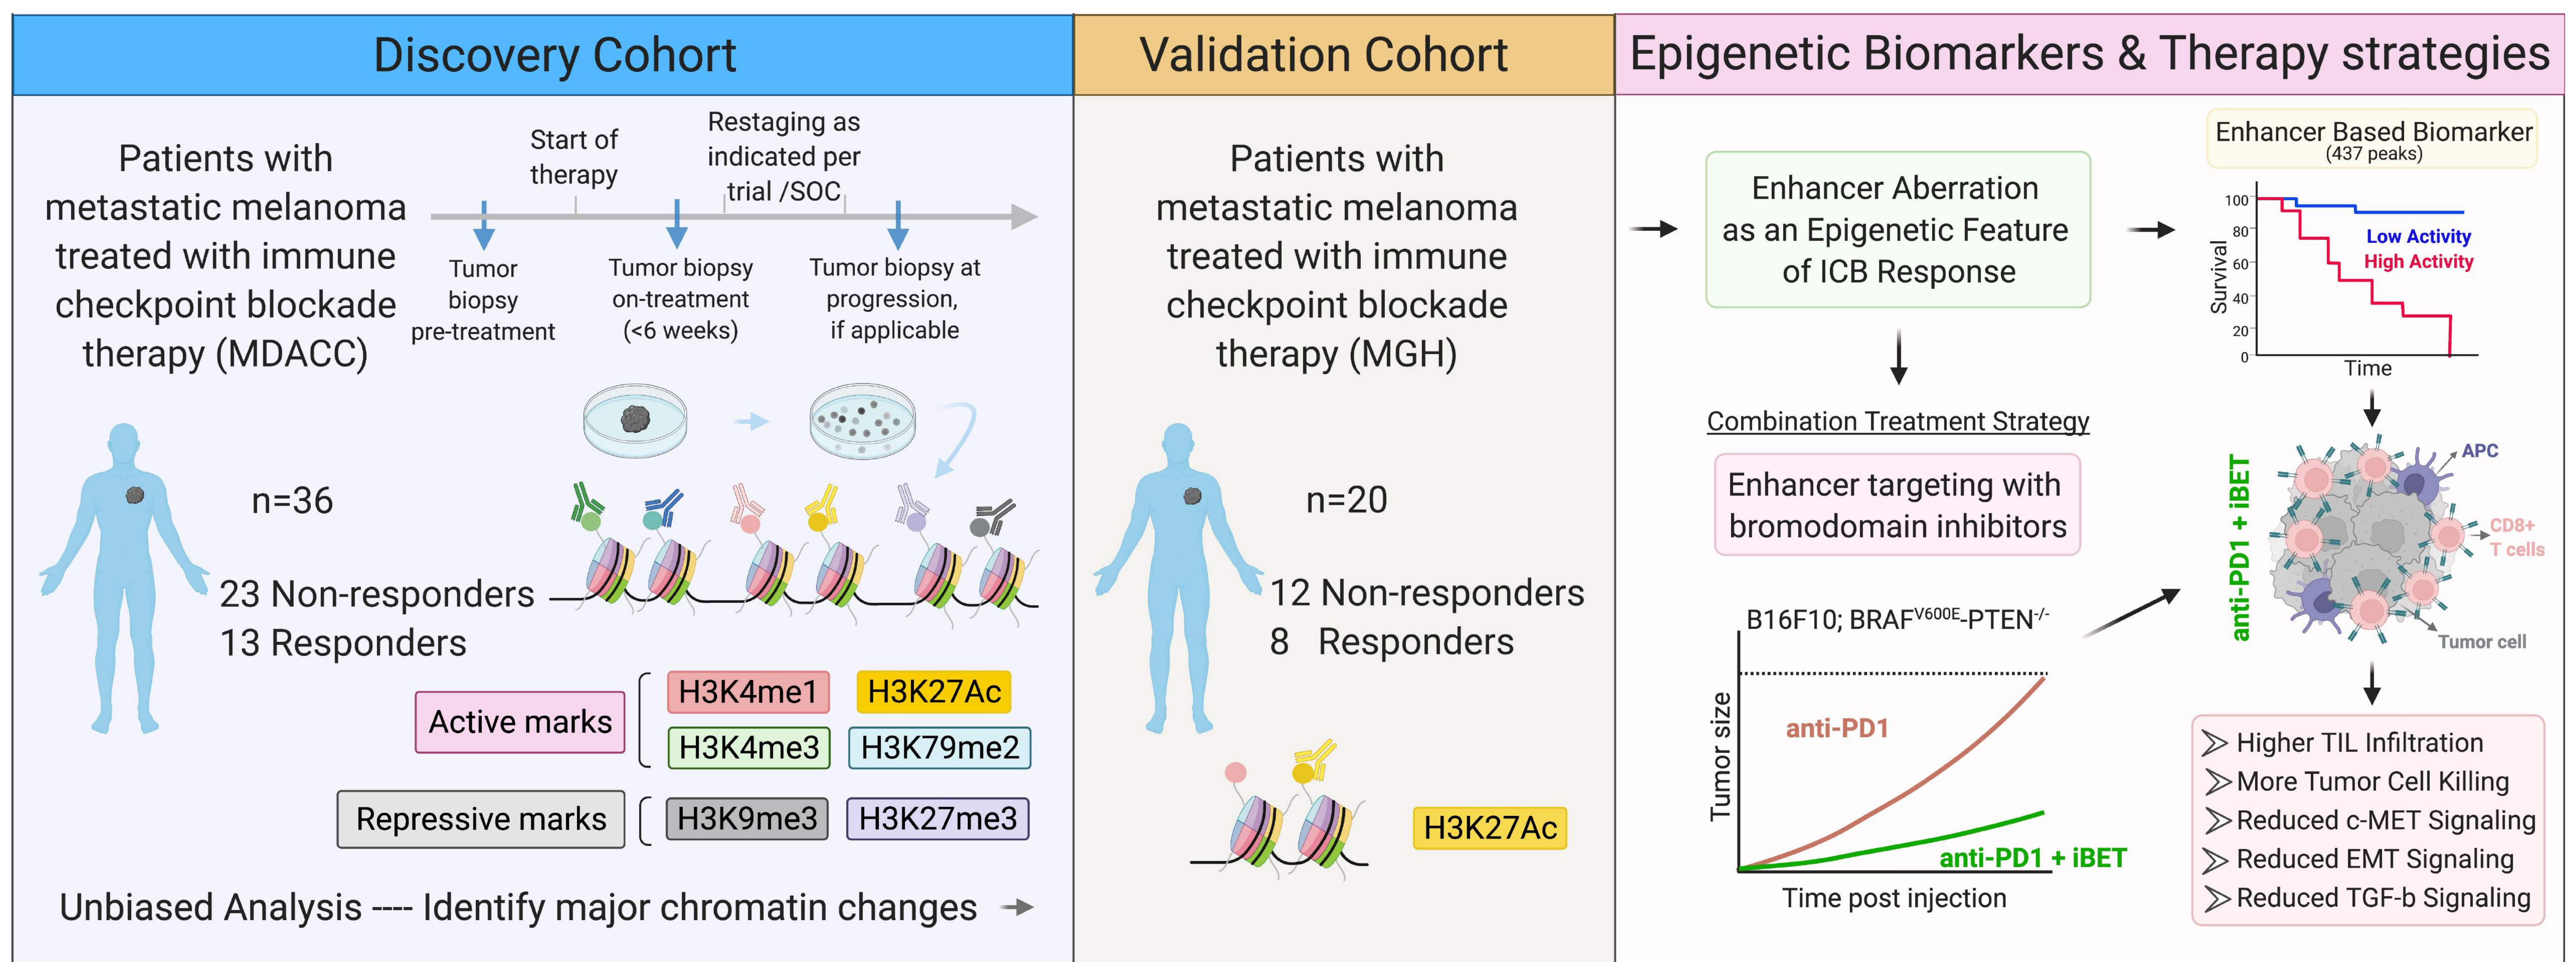

B.

Chromatin State Emission and Annotation

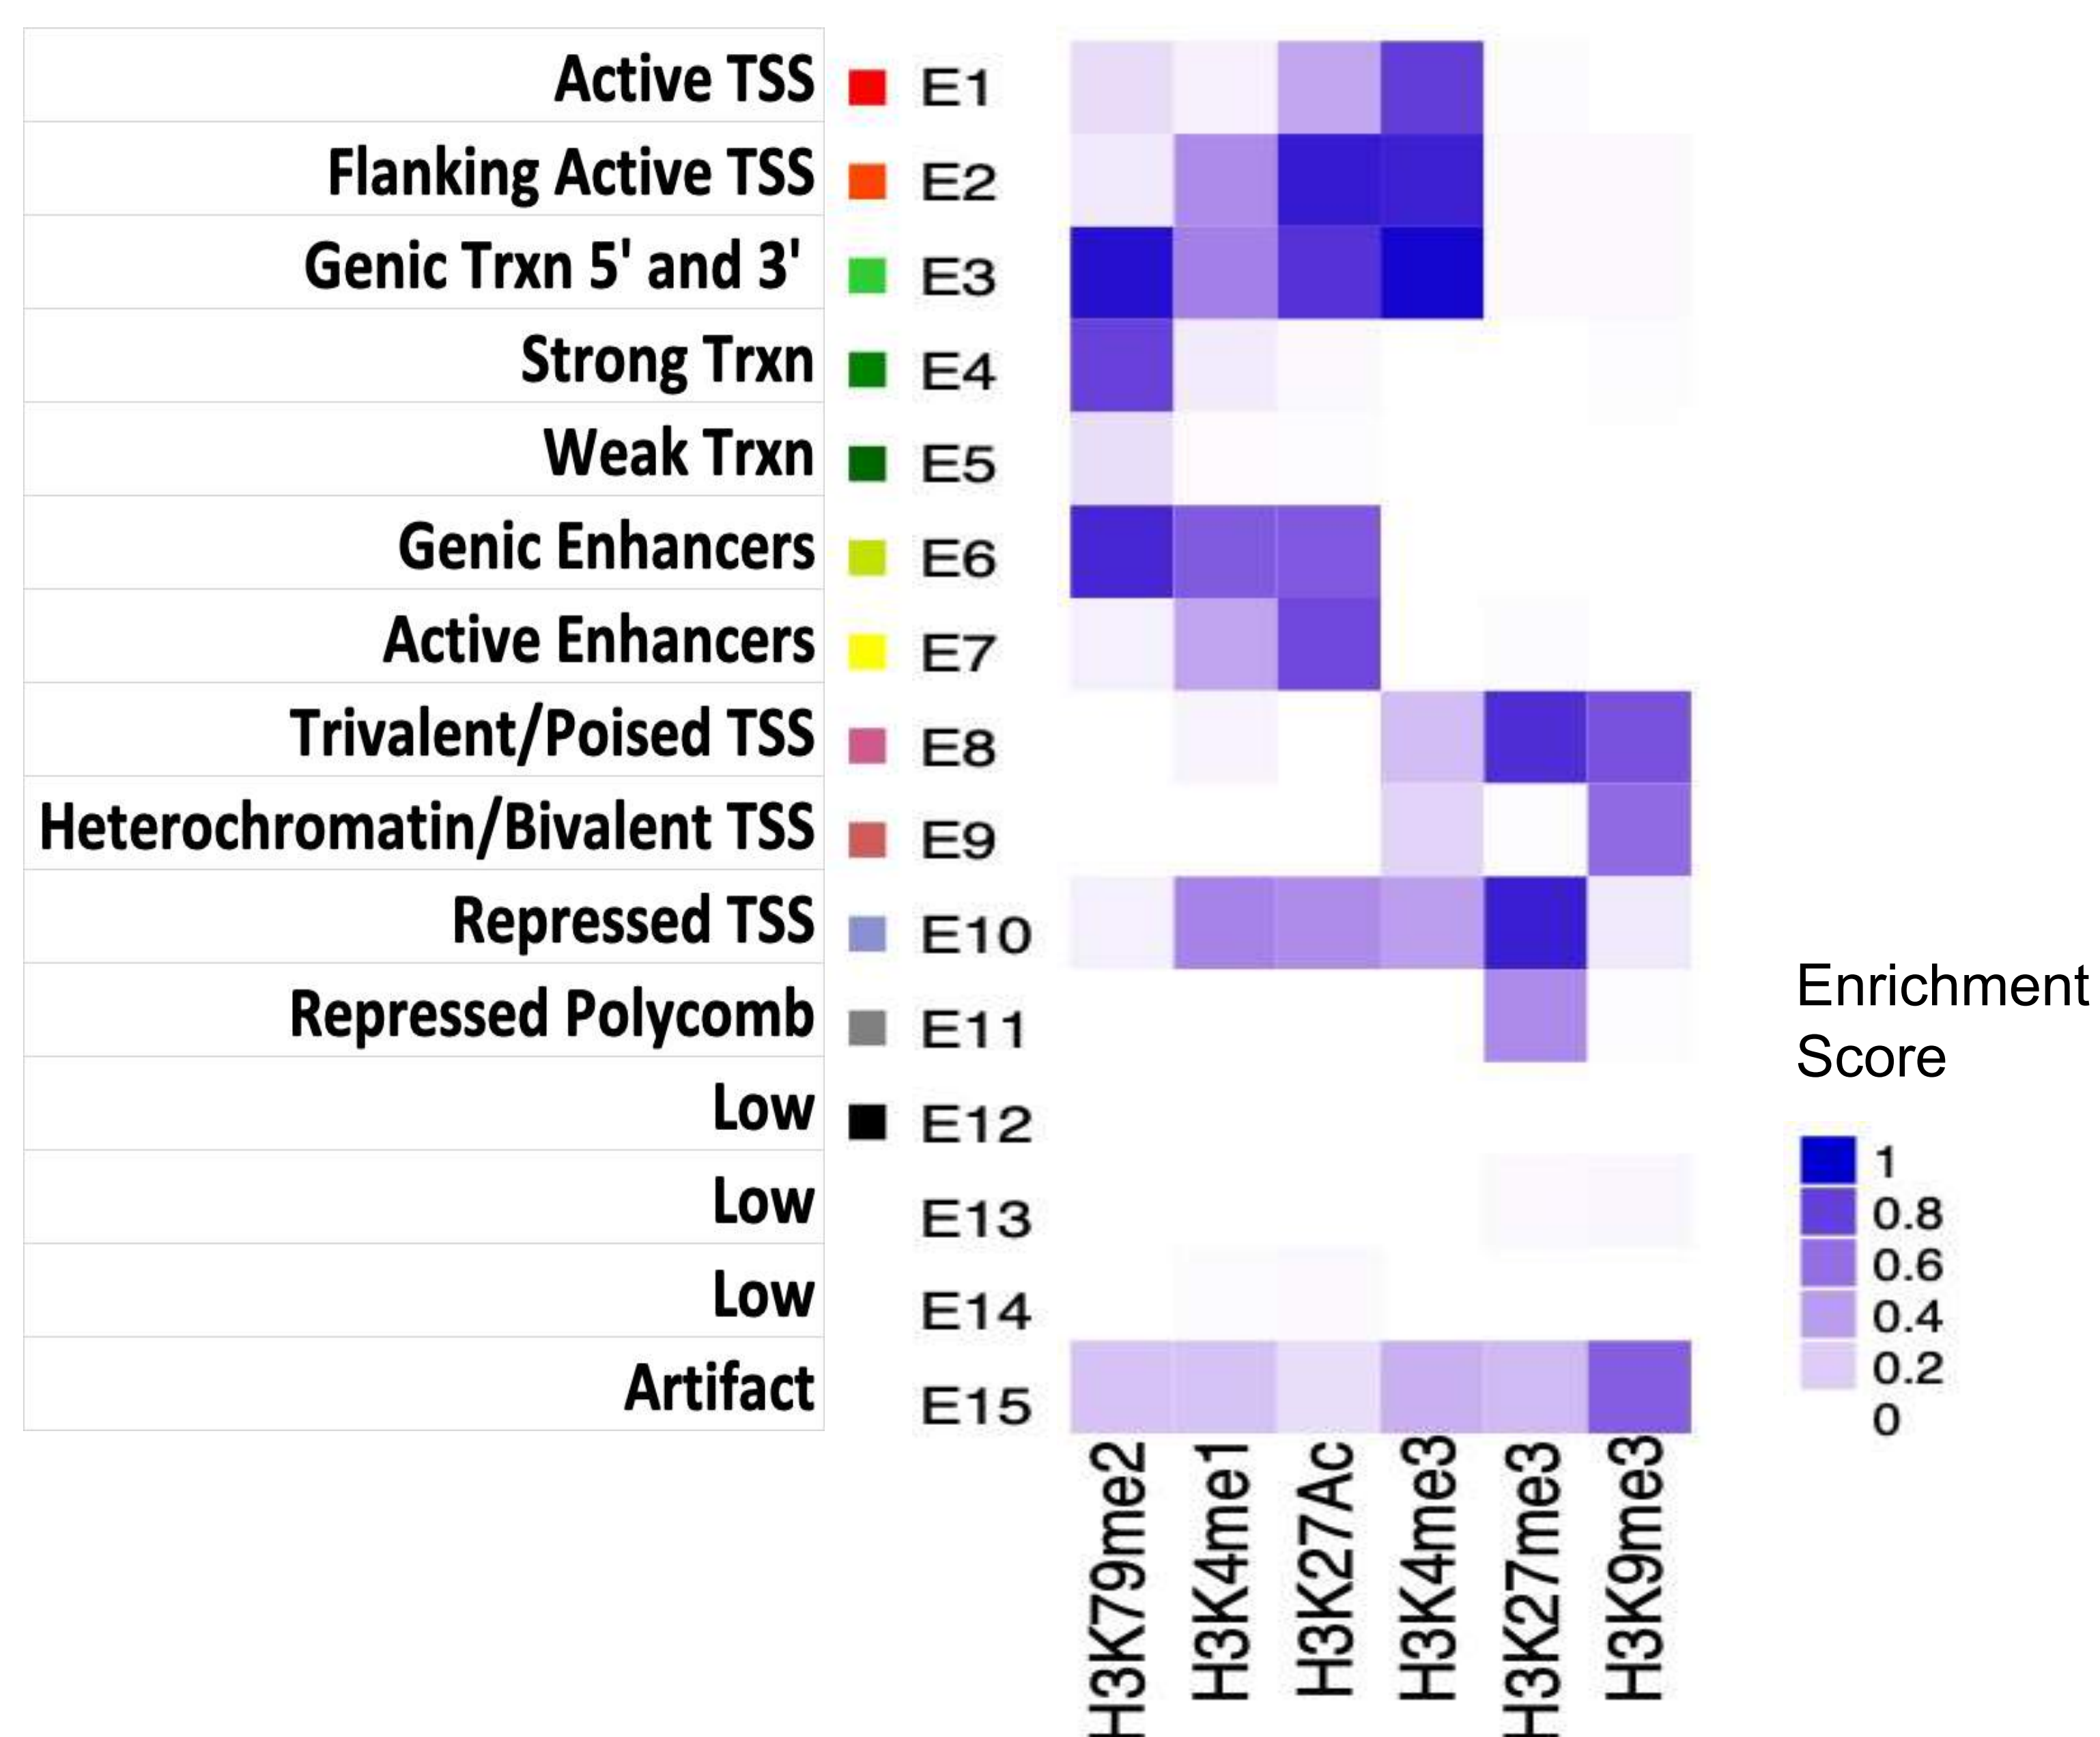

C.

Chromatin State Transition Non-responder vs Responder

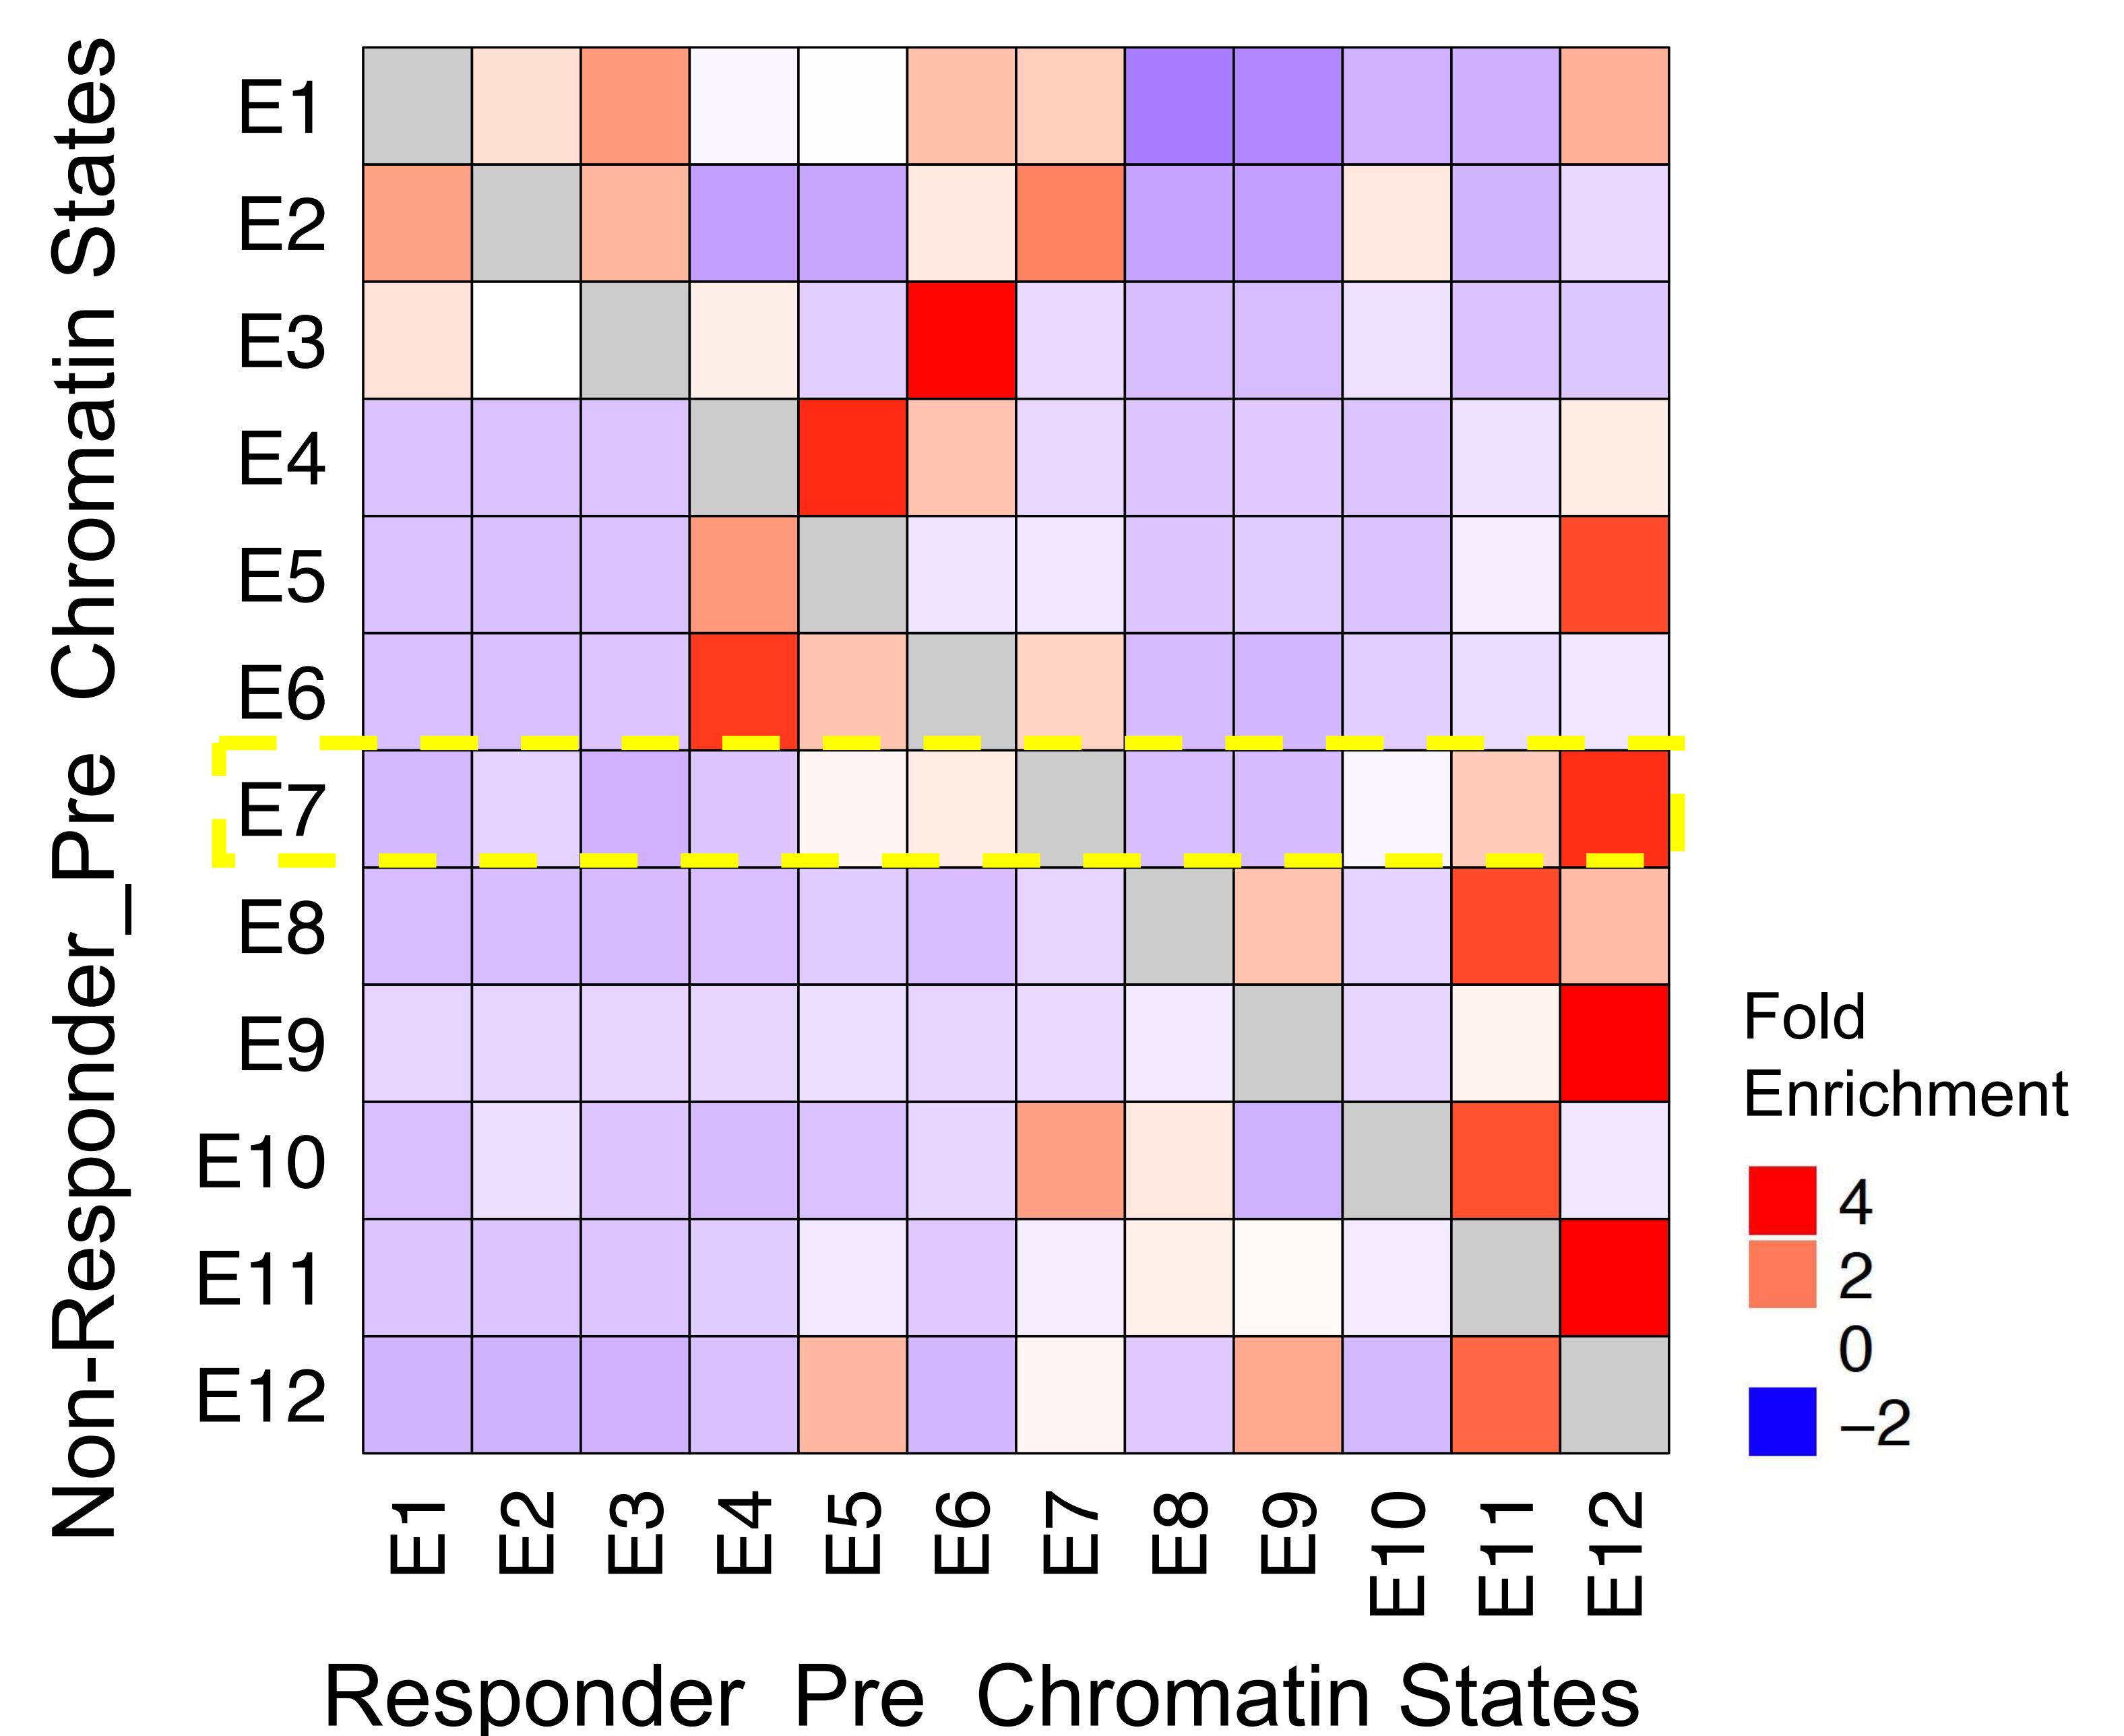

D.

Differential Regions at Pre-treatment

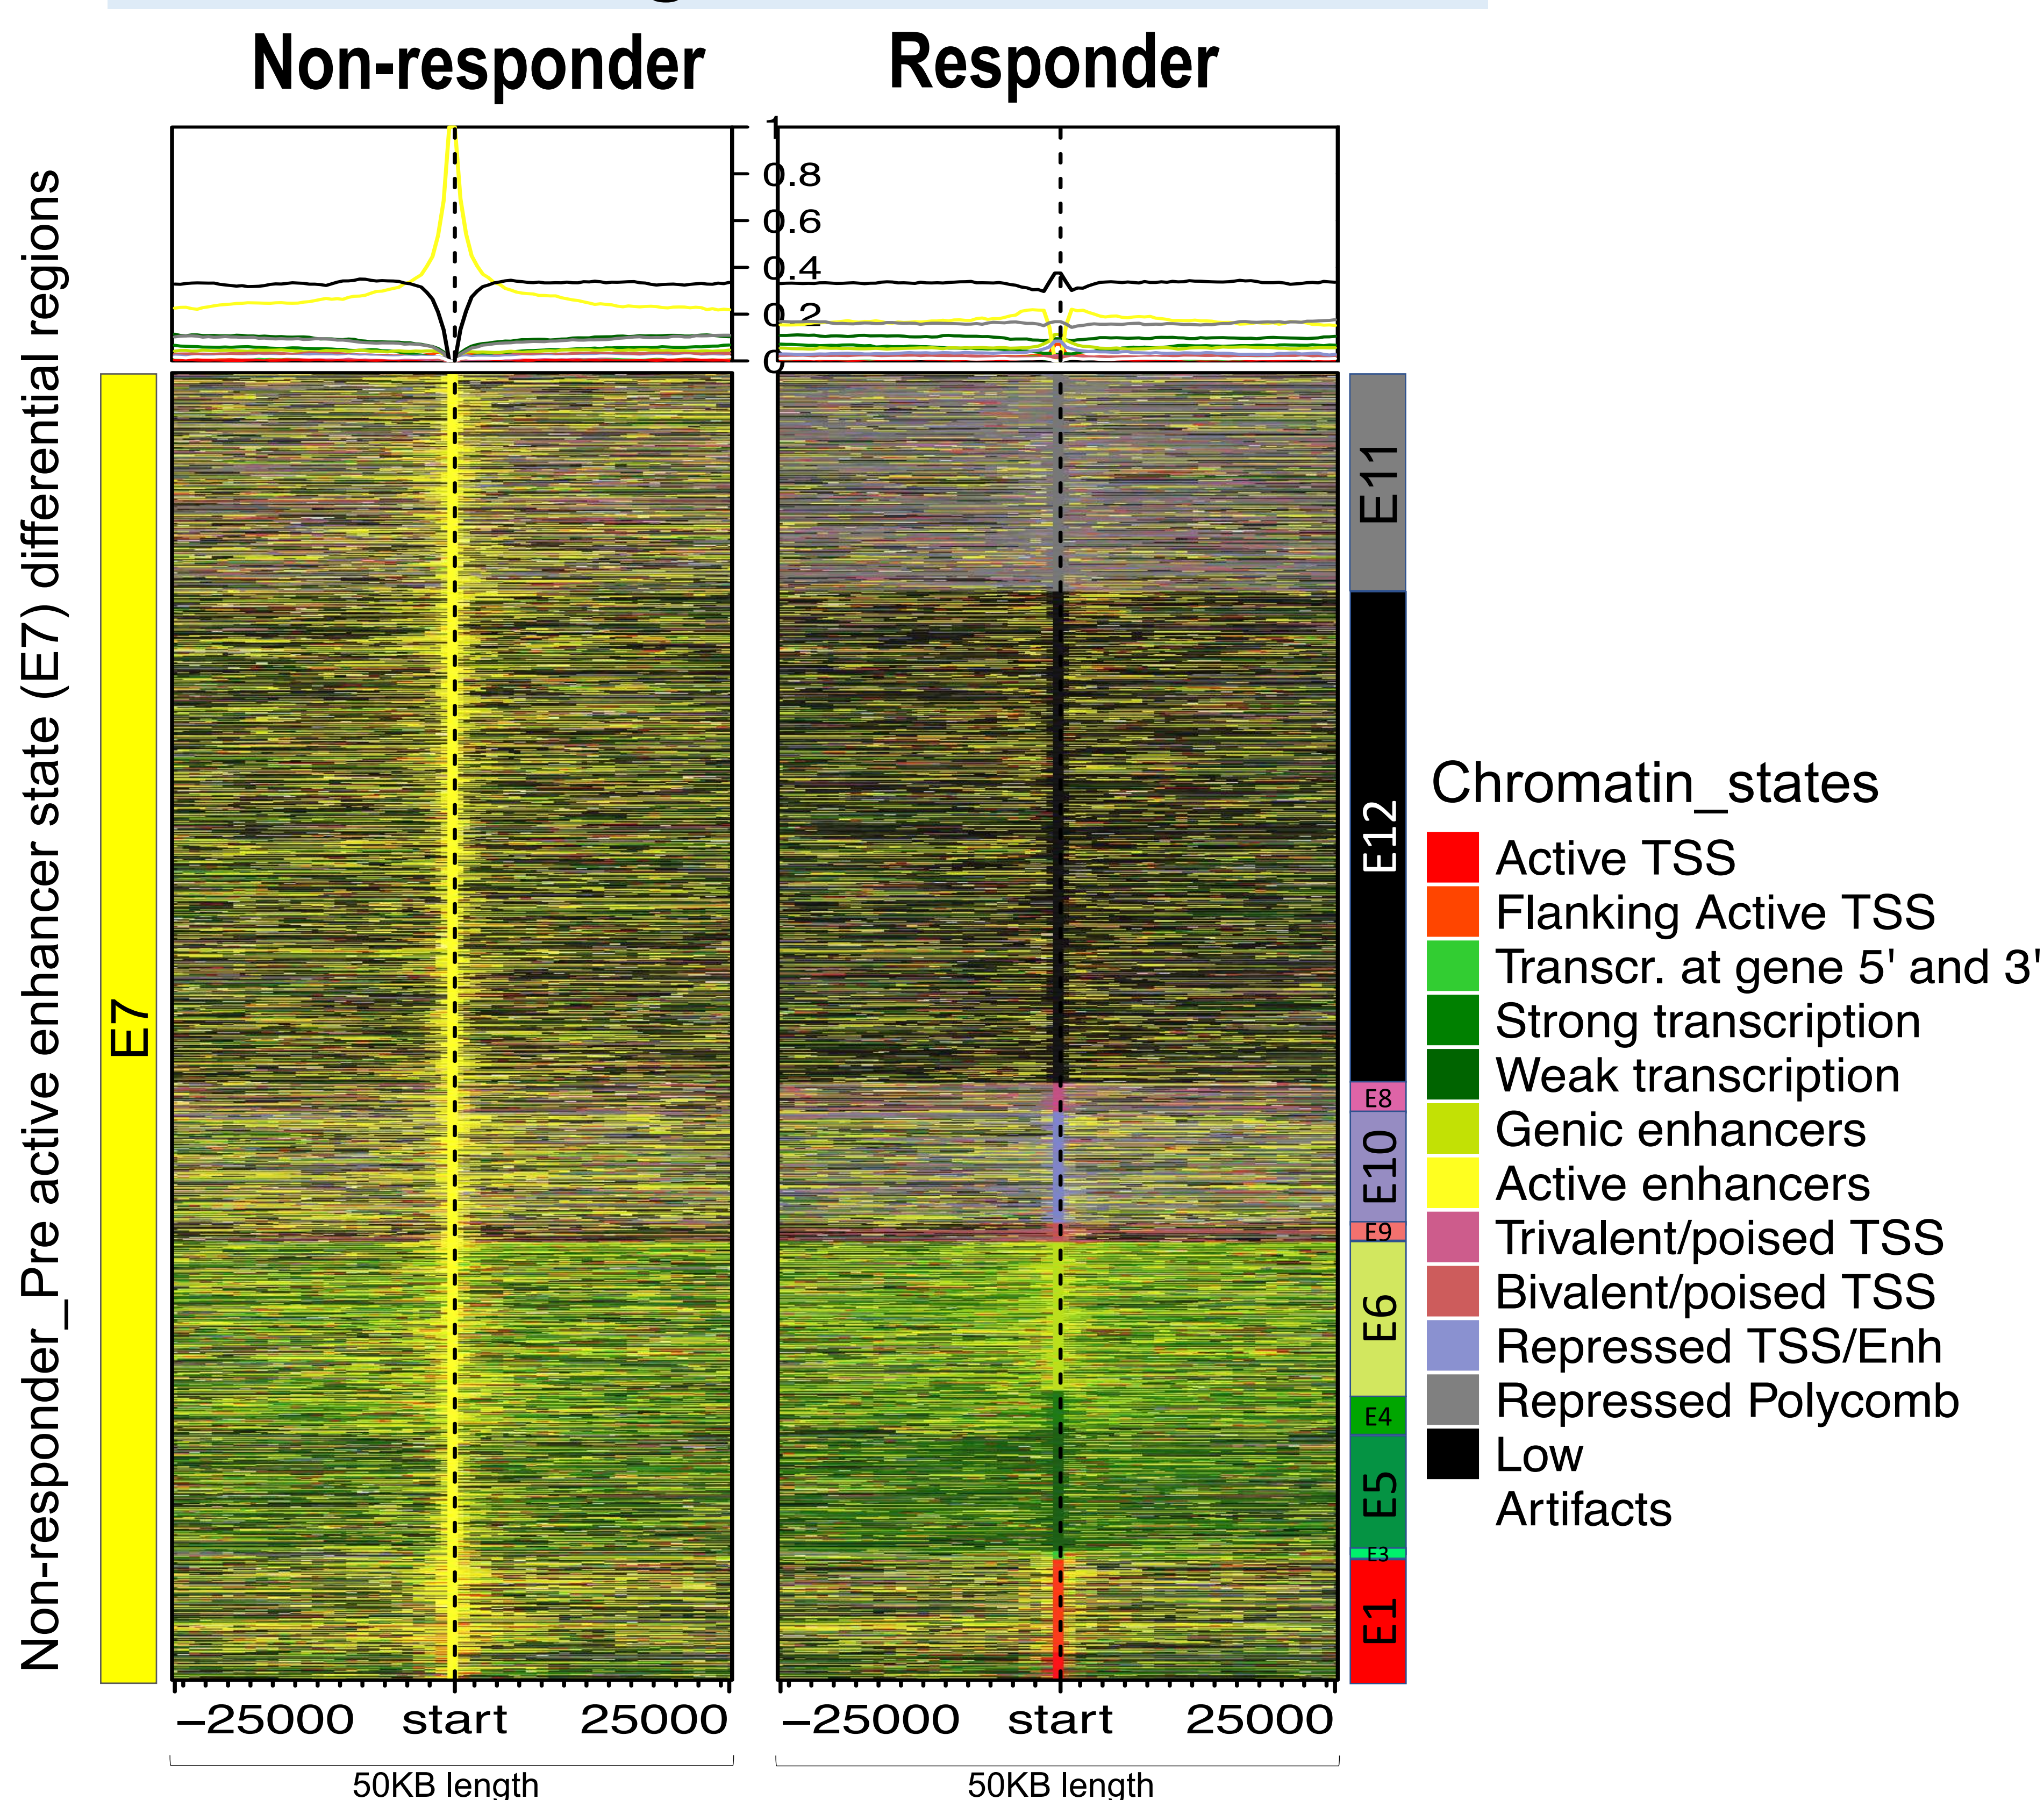

E.

H3K27ac Peaks at Differential Enhancers

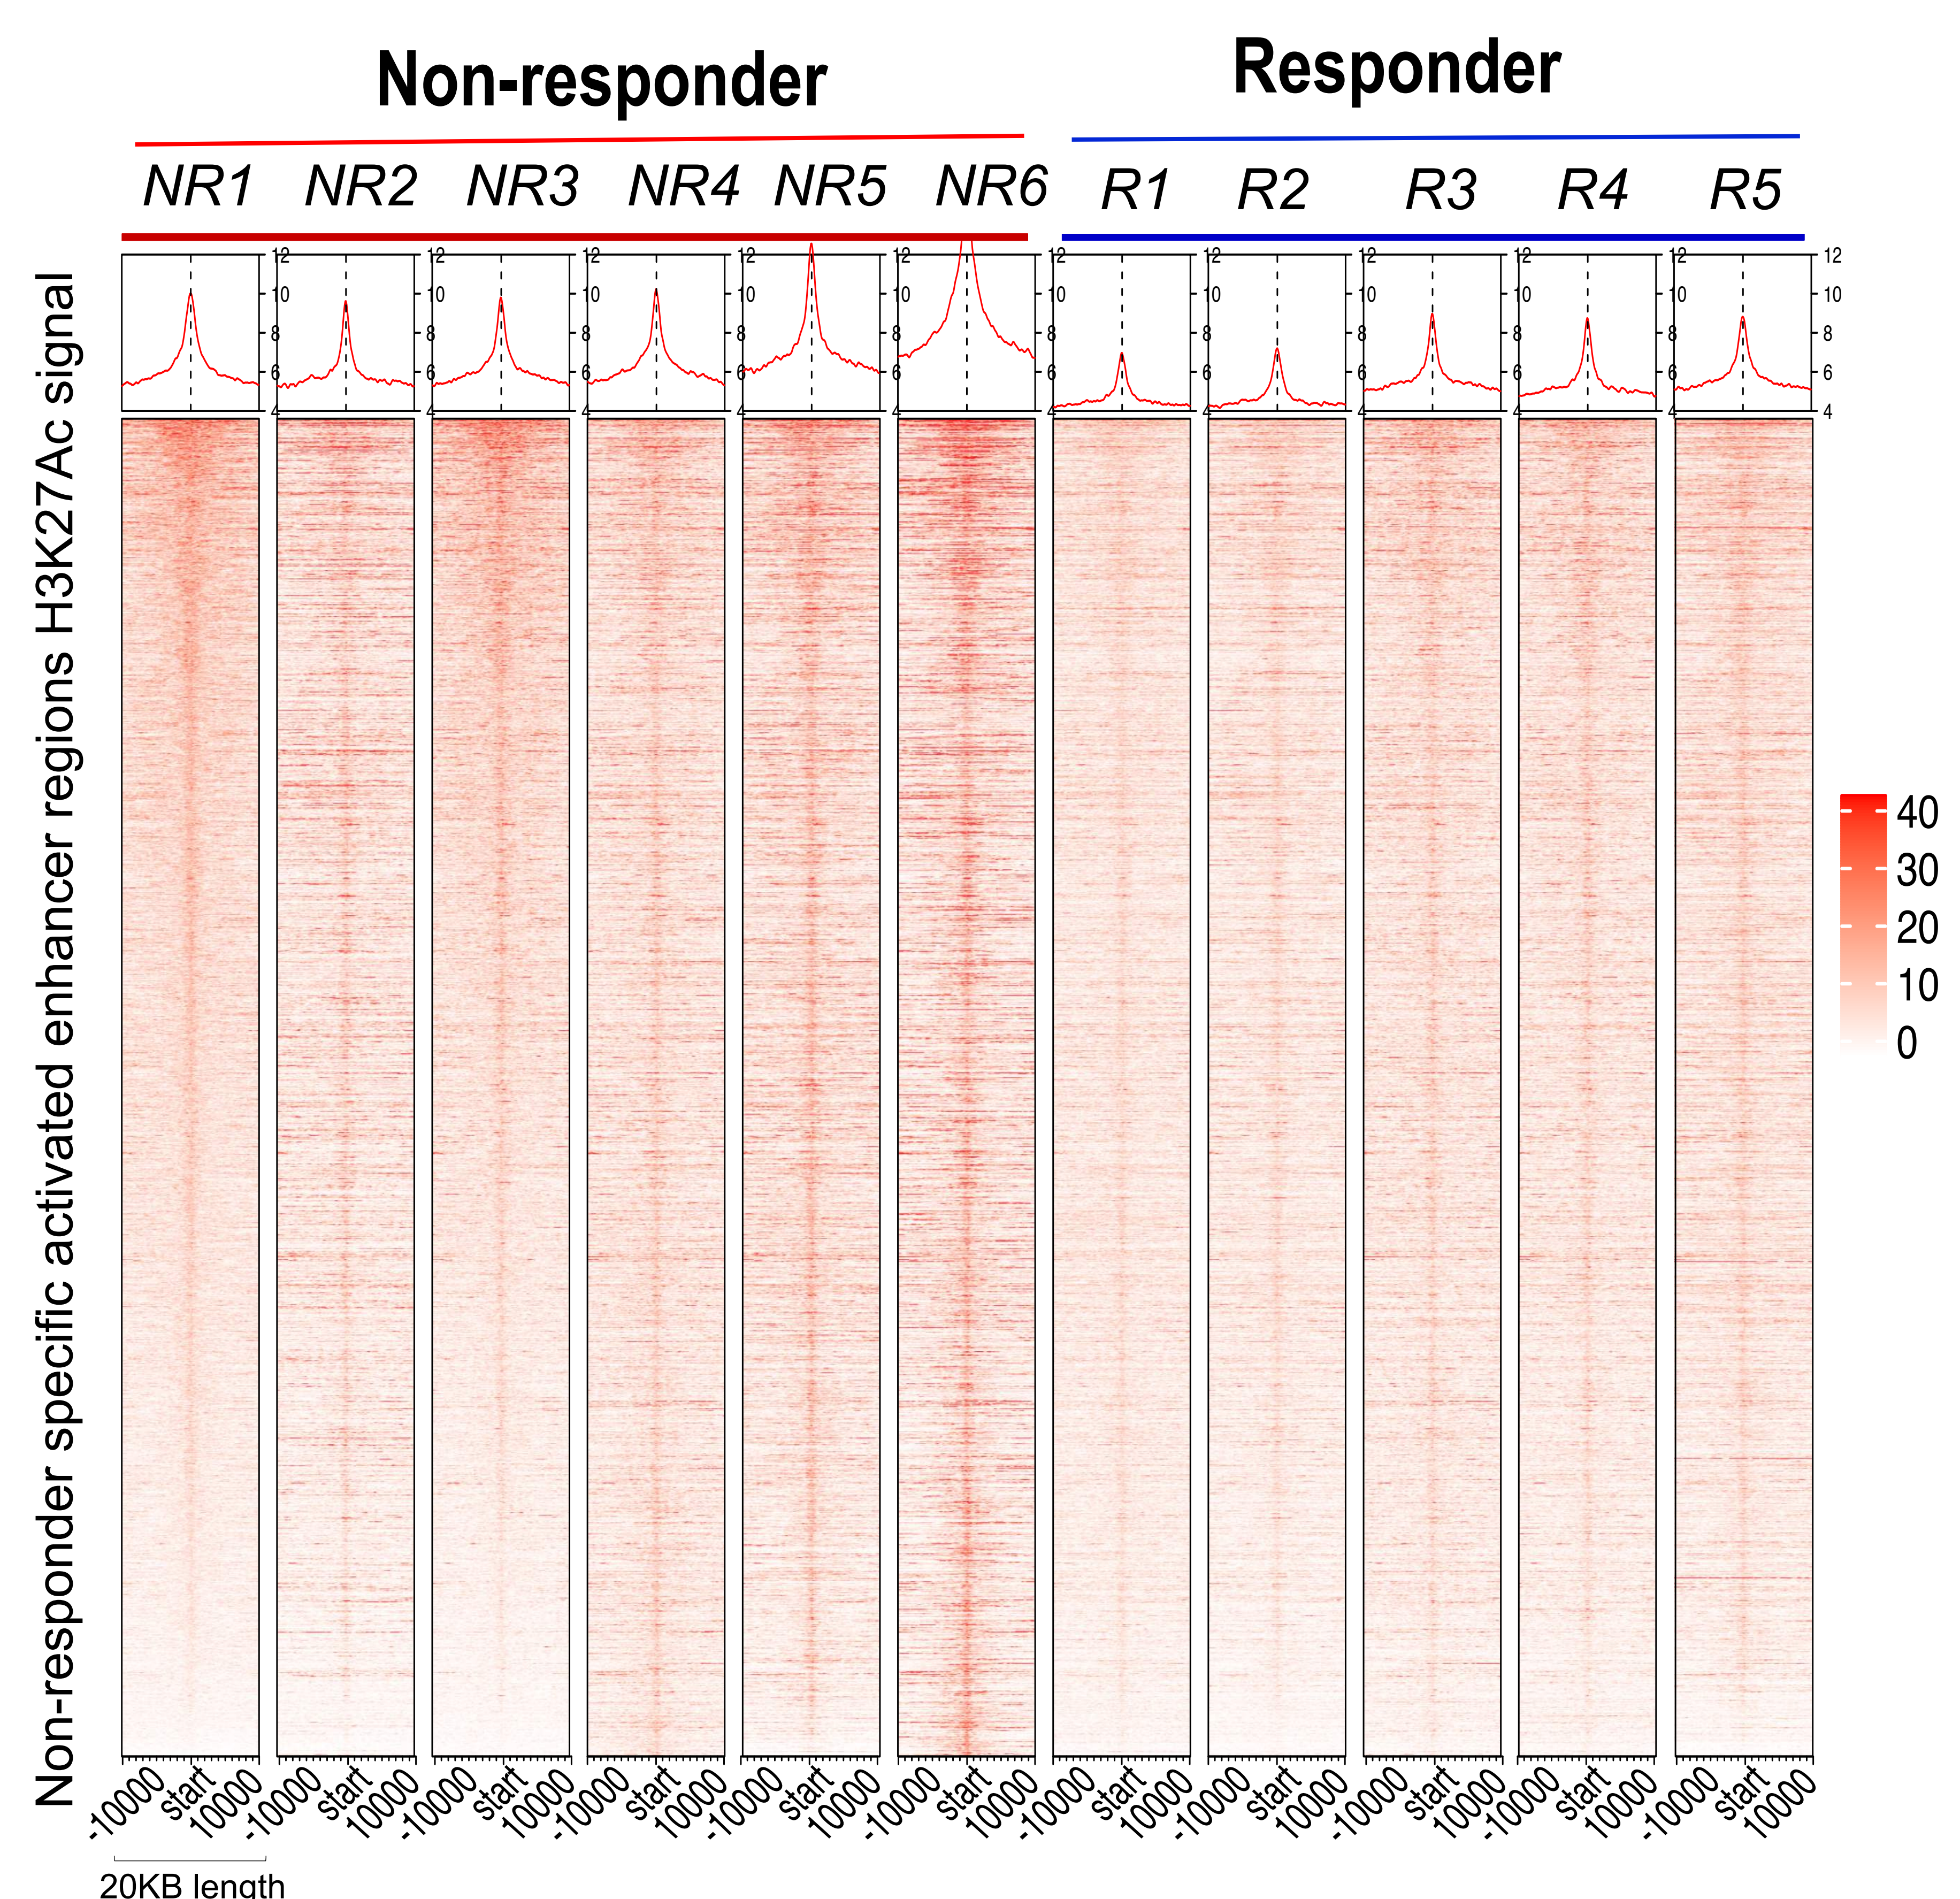

**A.** MDACC versus MGH Replicated Peaks

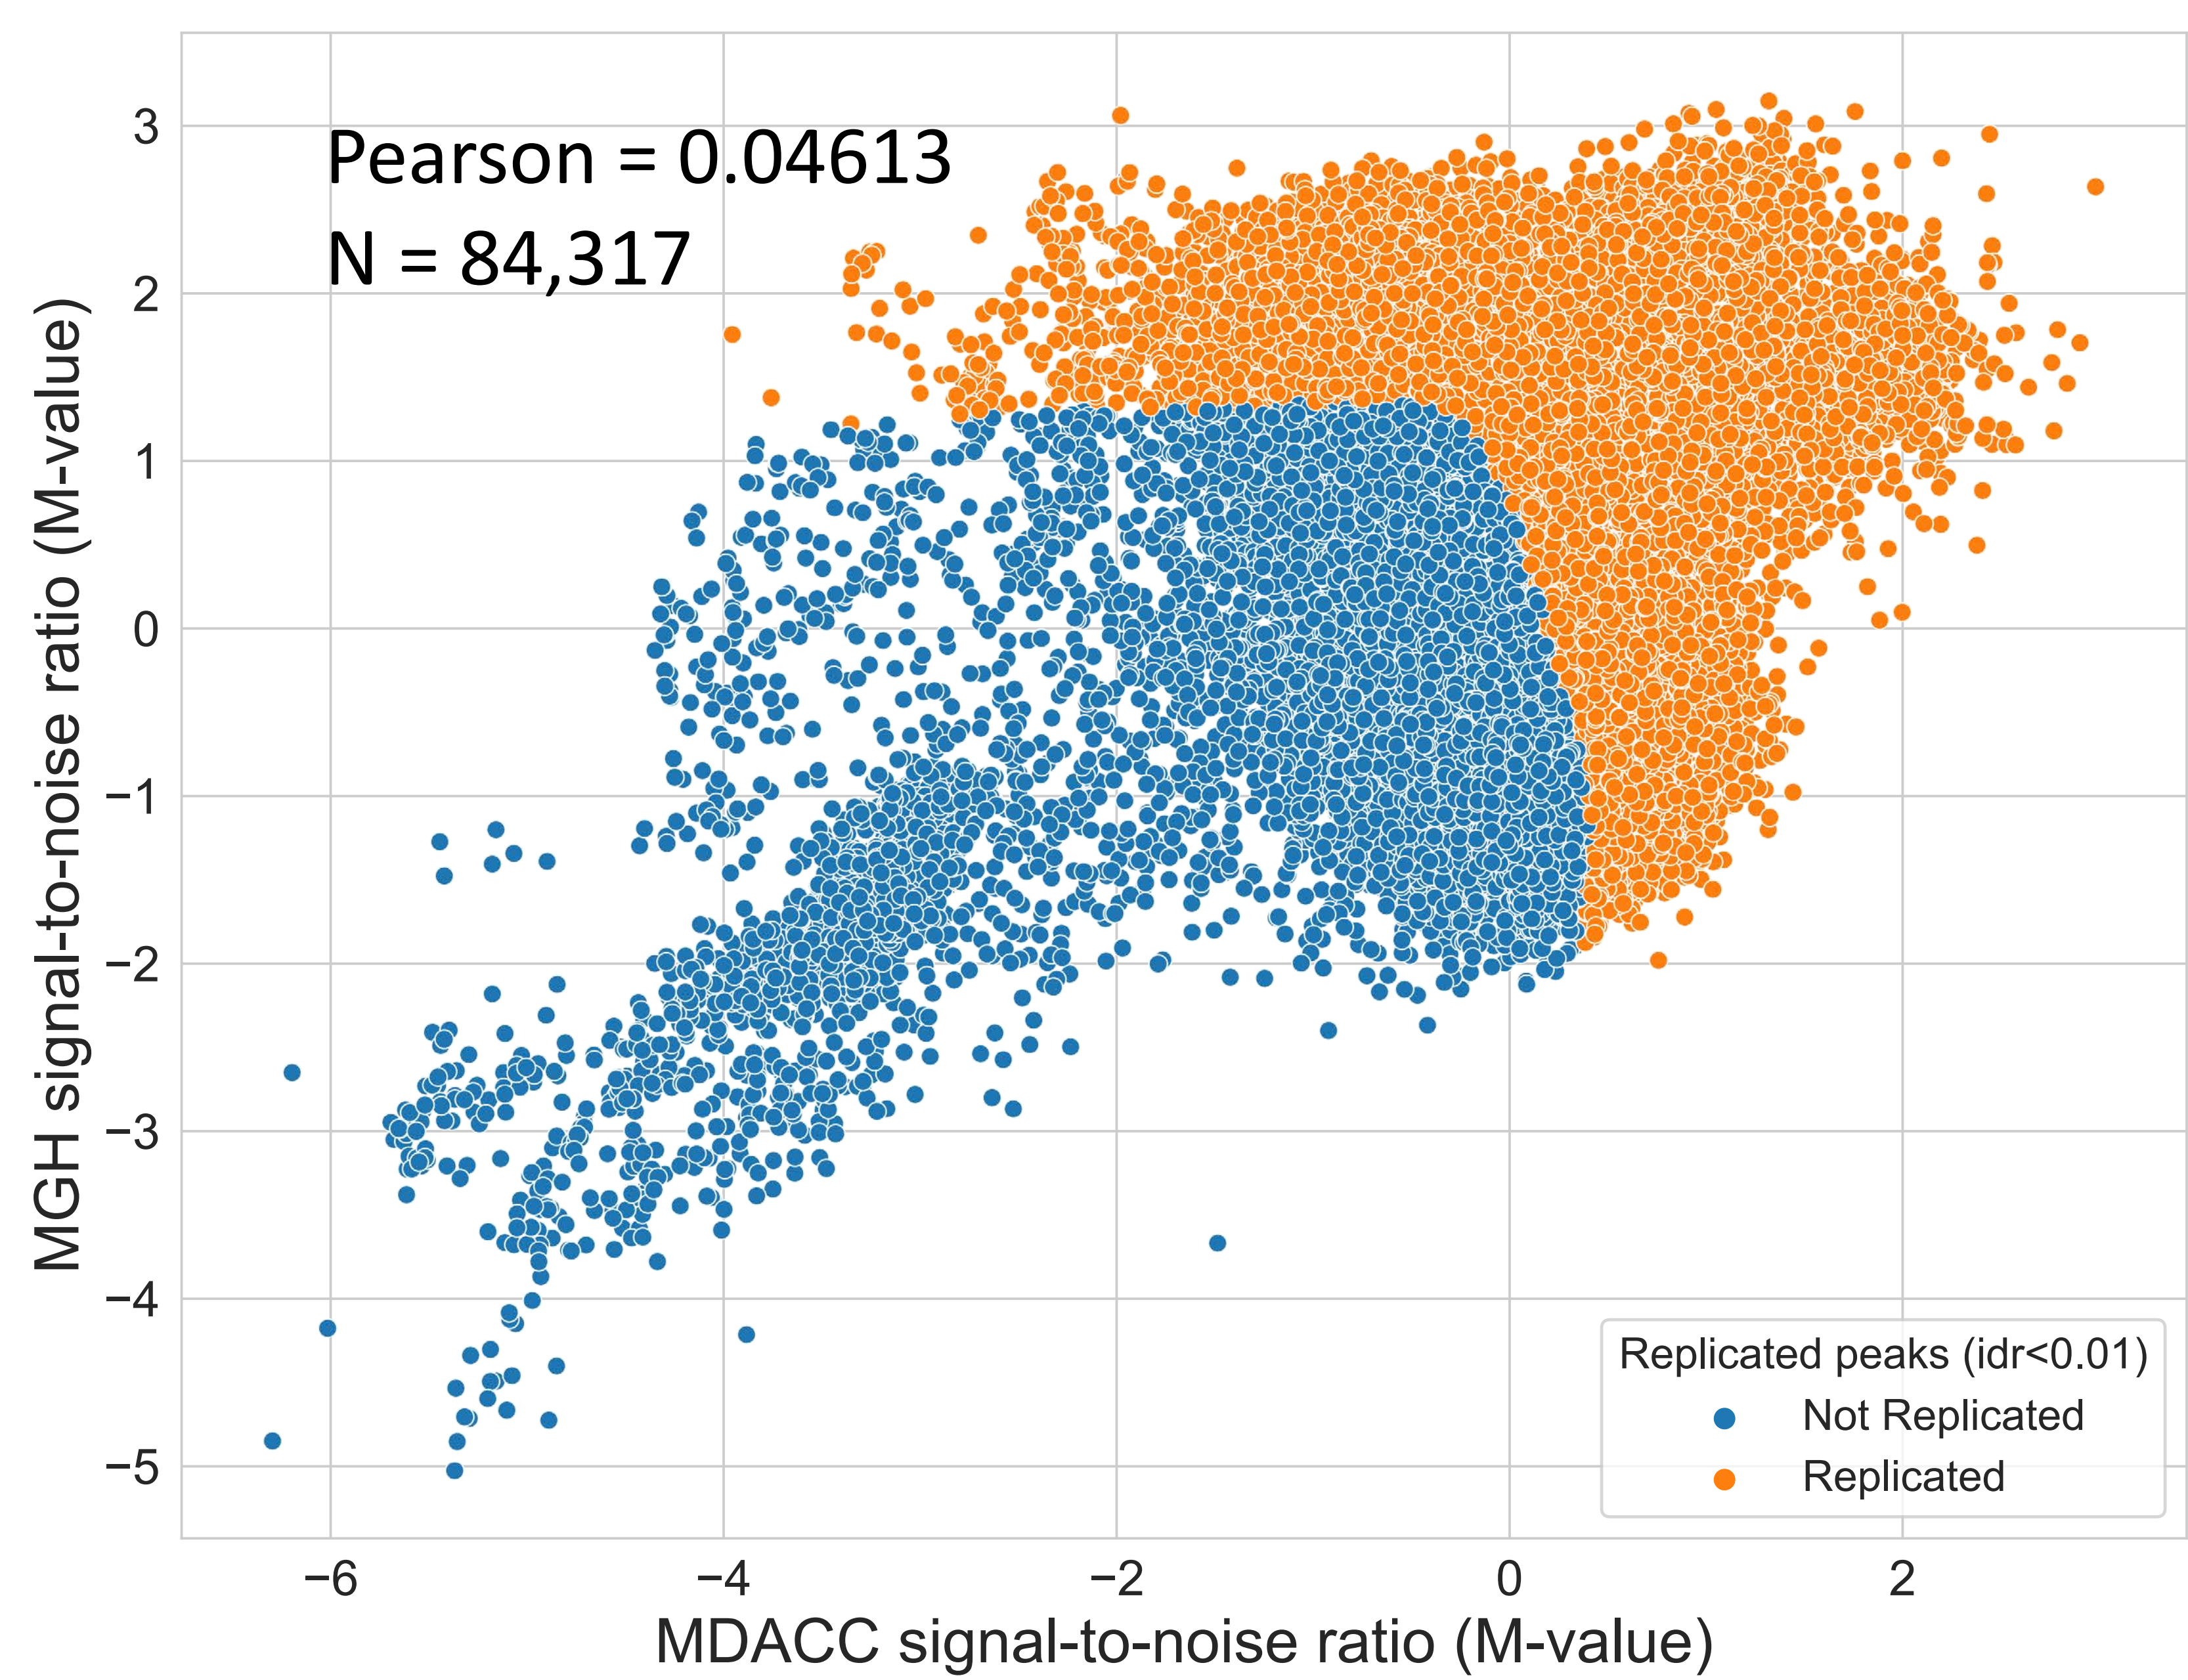

**B.** Response Prediction using Replicated Peaks

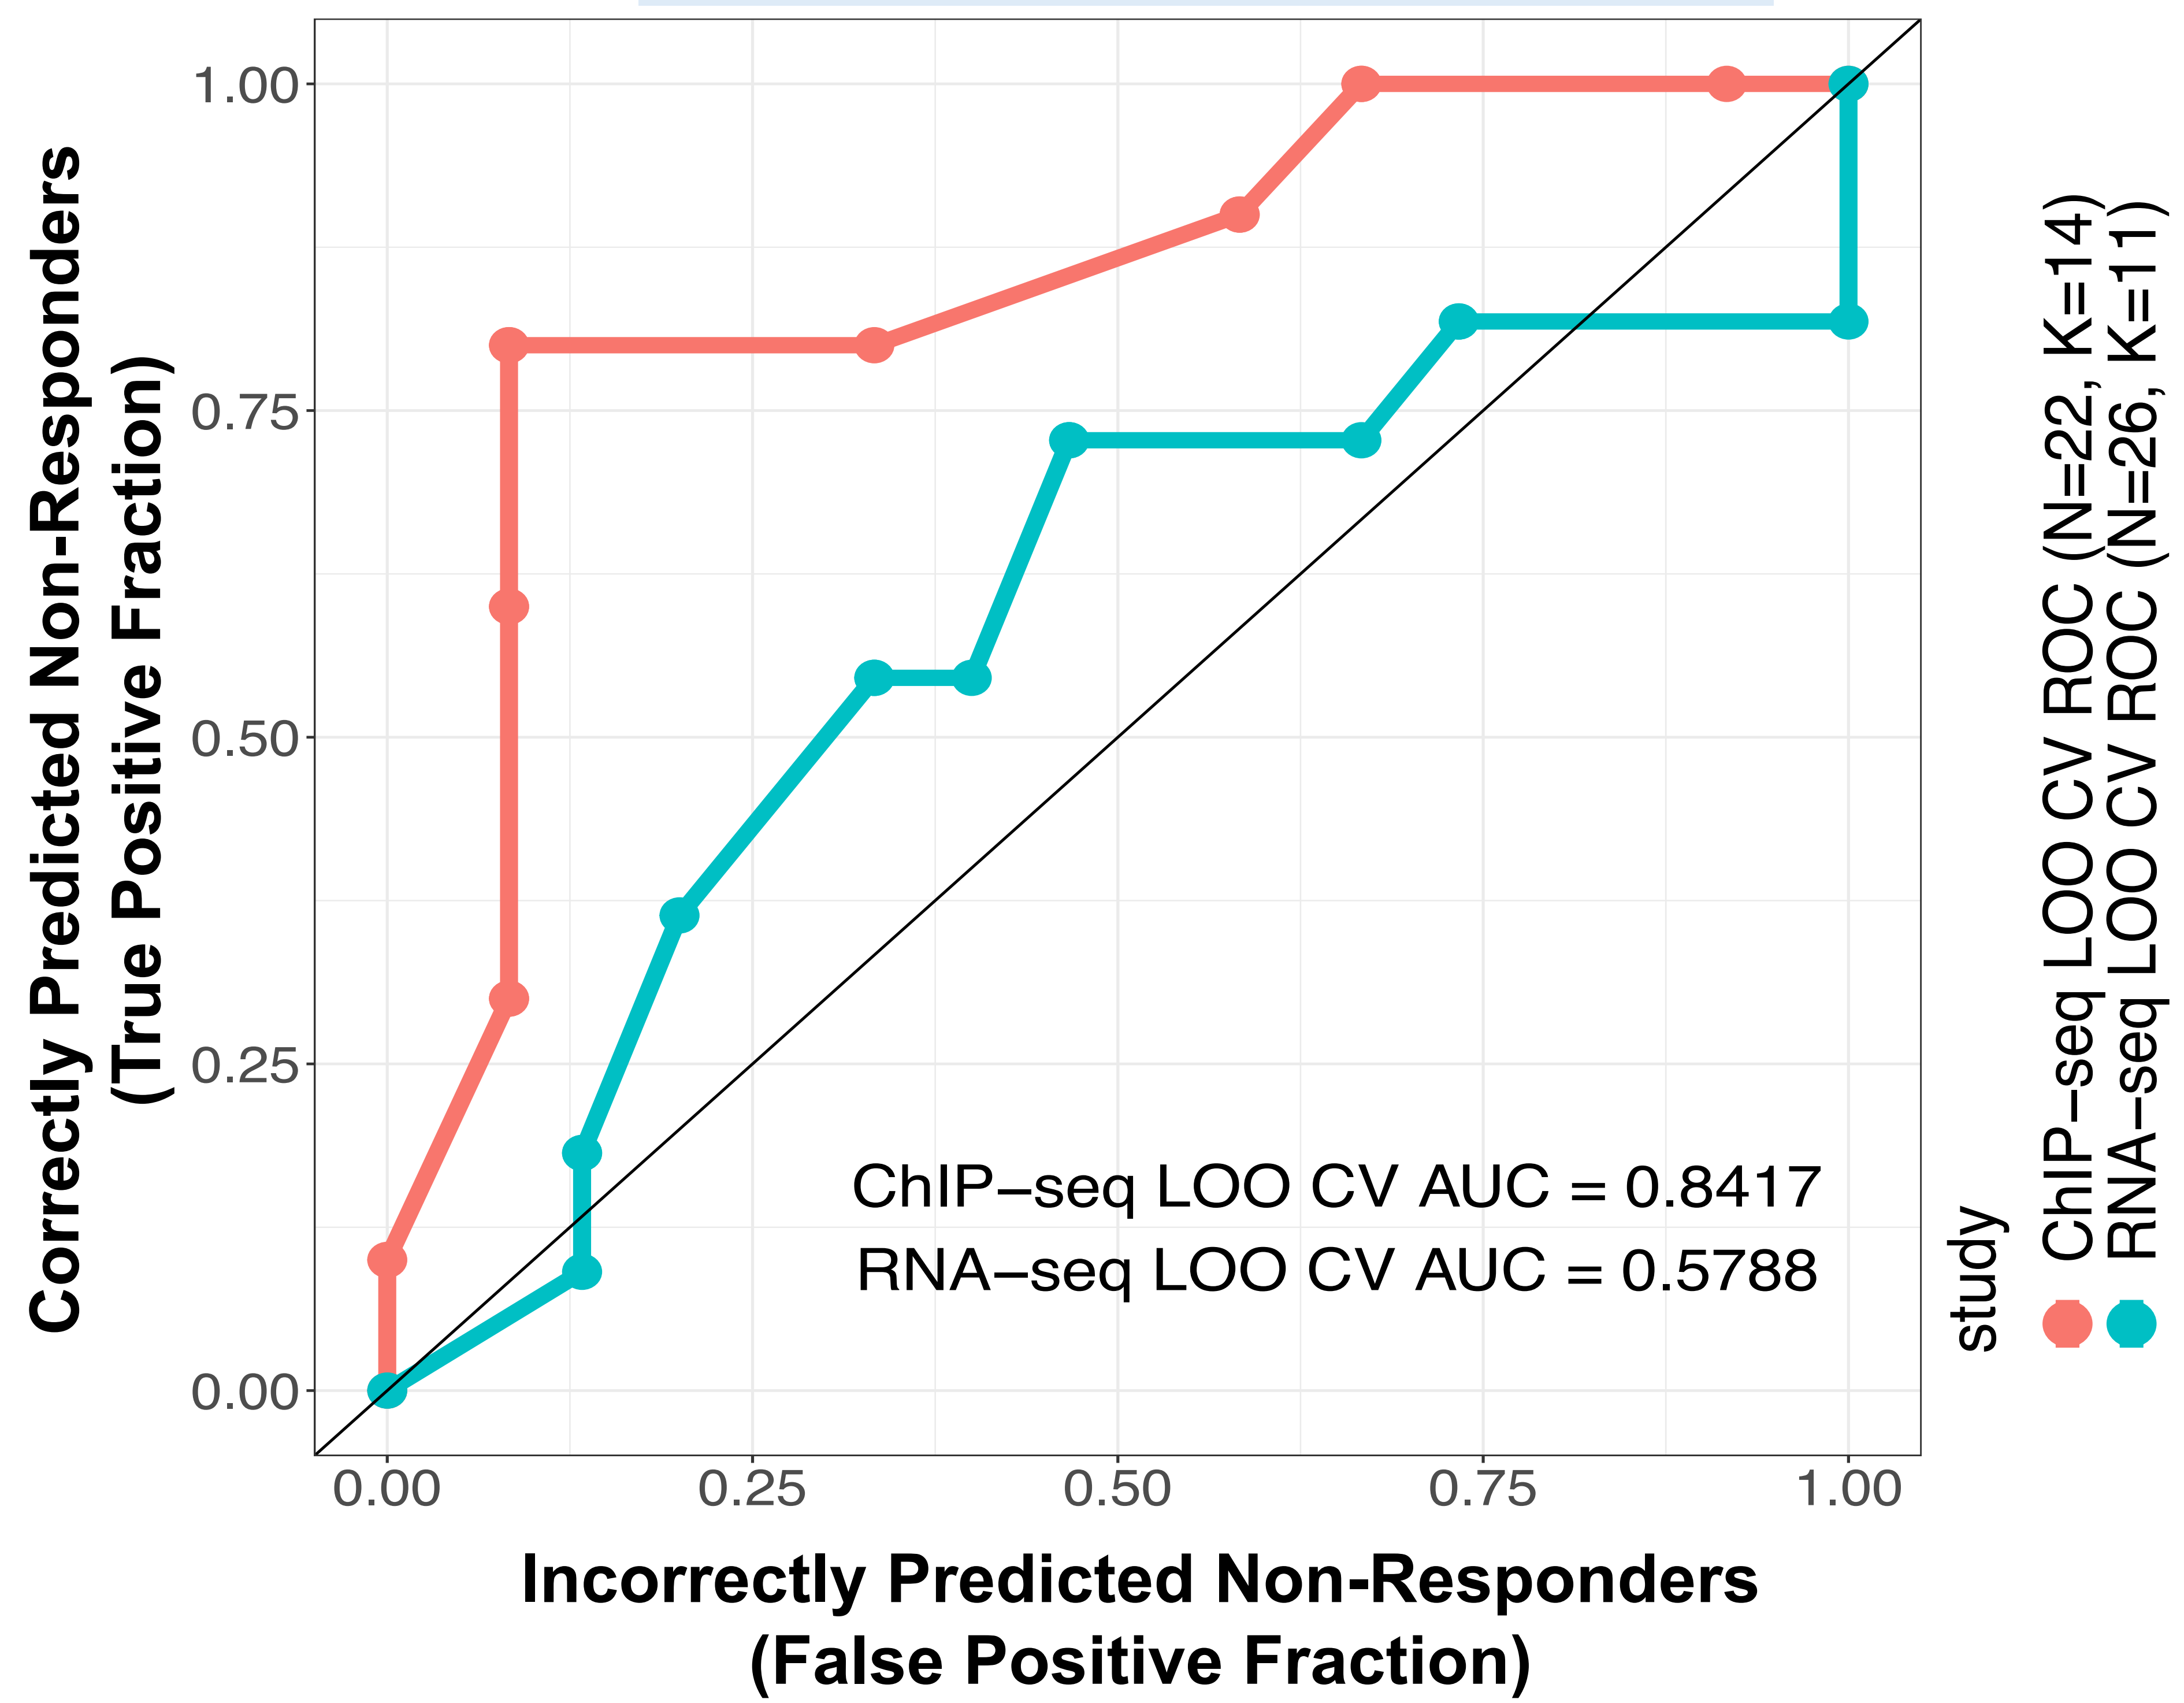

**C.** Progression-Free Survival Prediction using Replicated Peaks

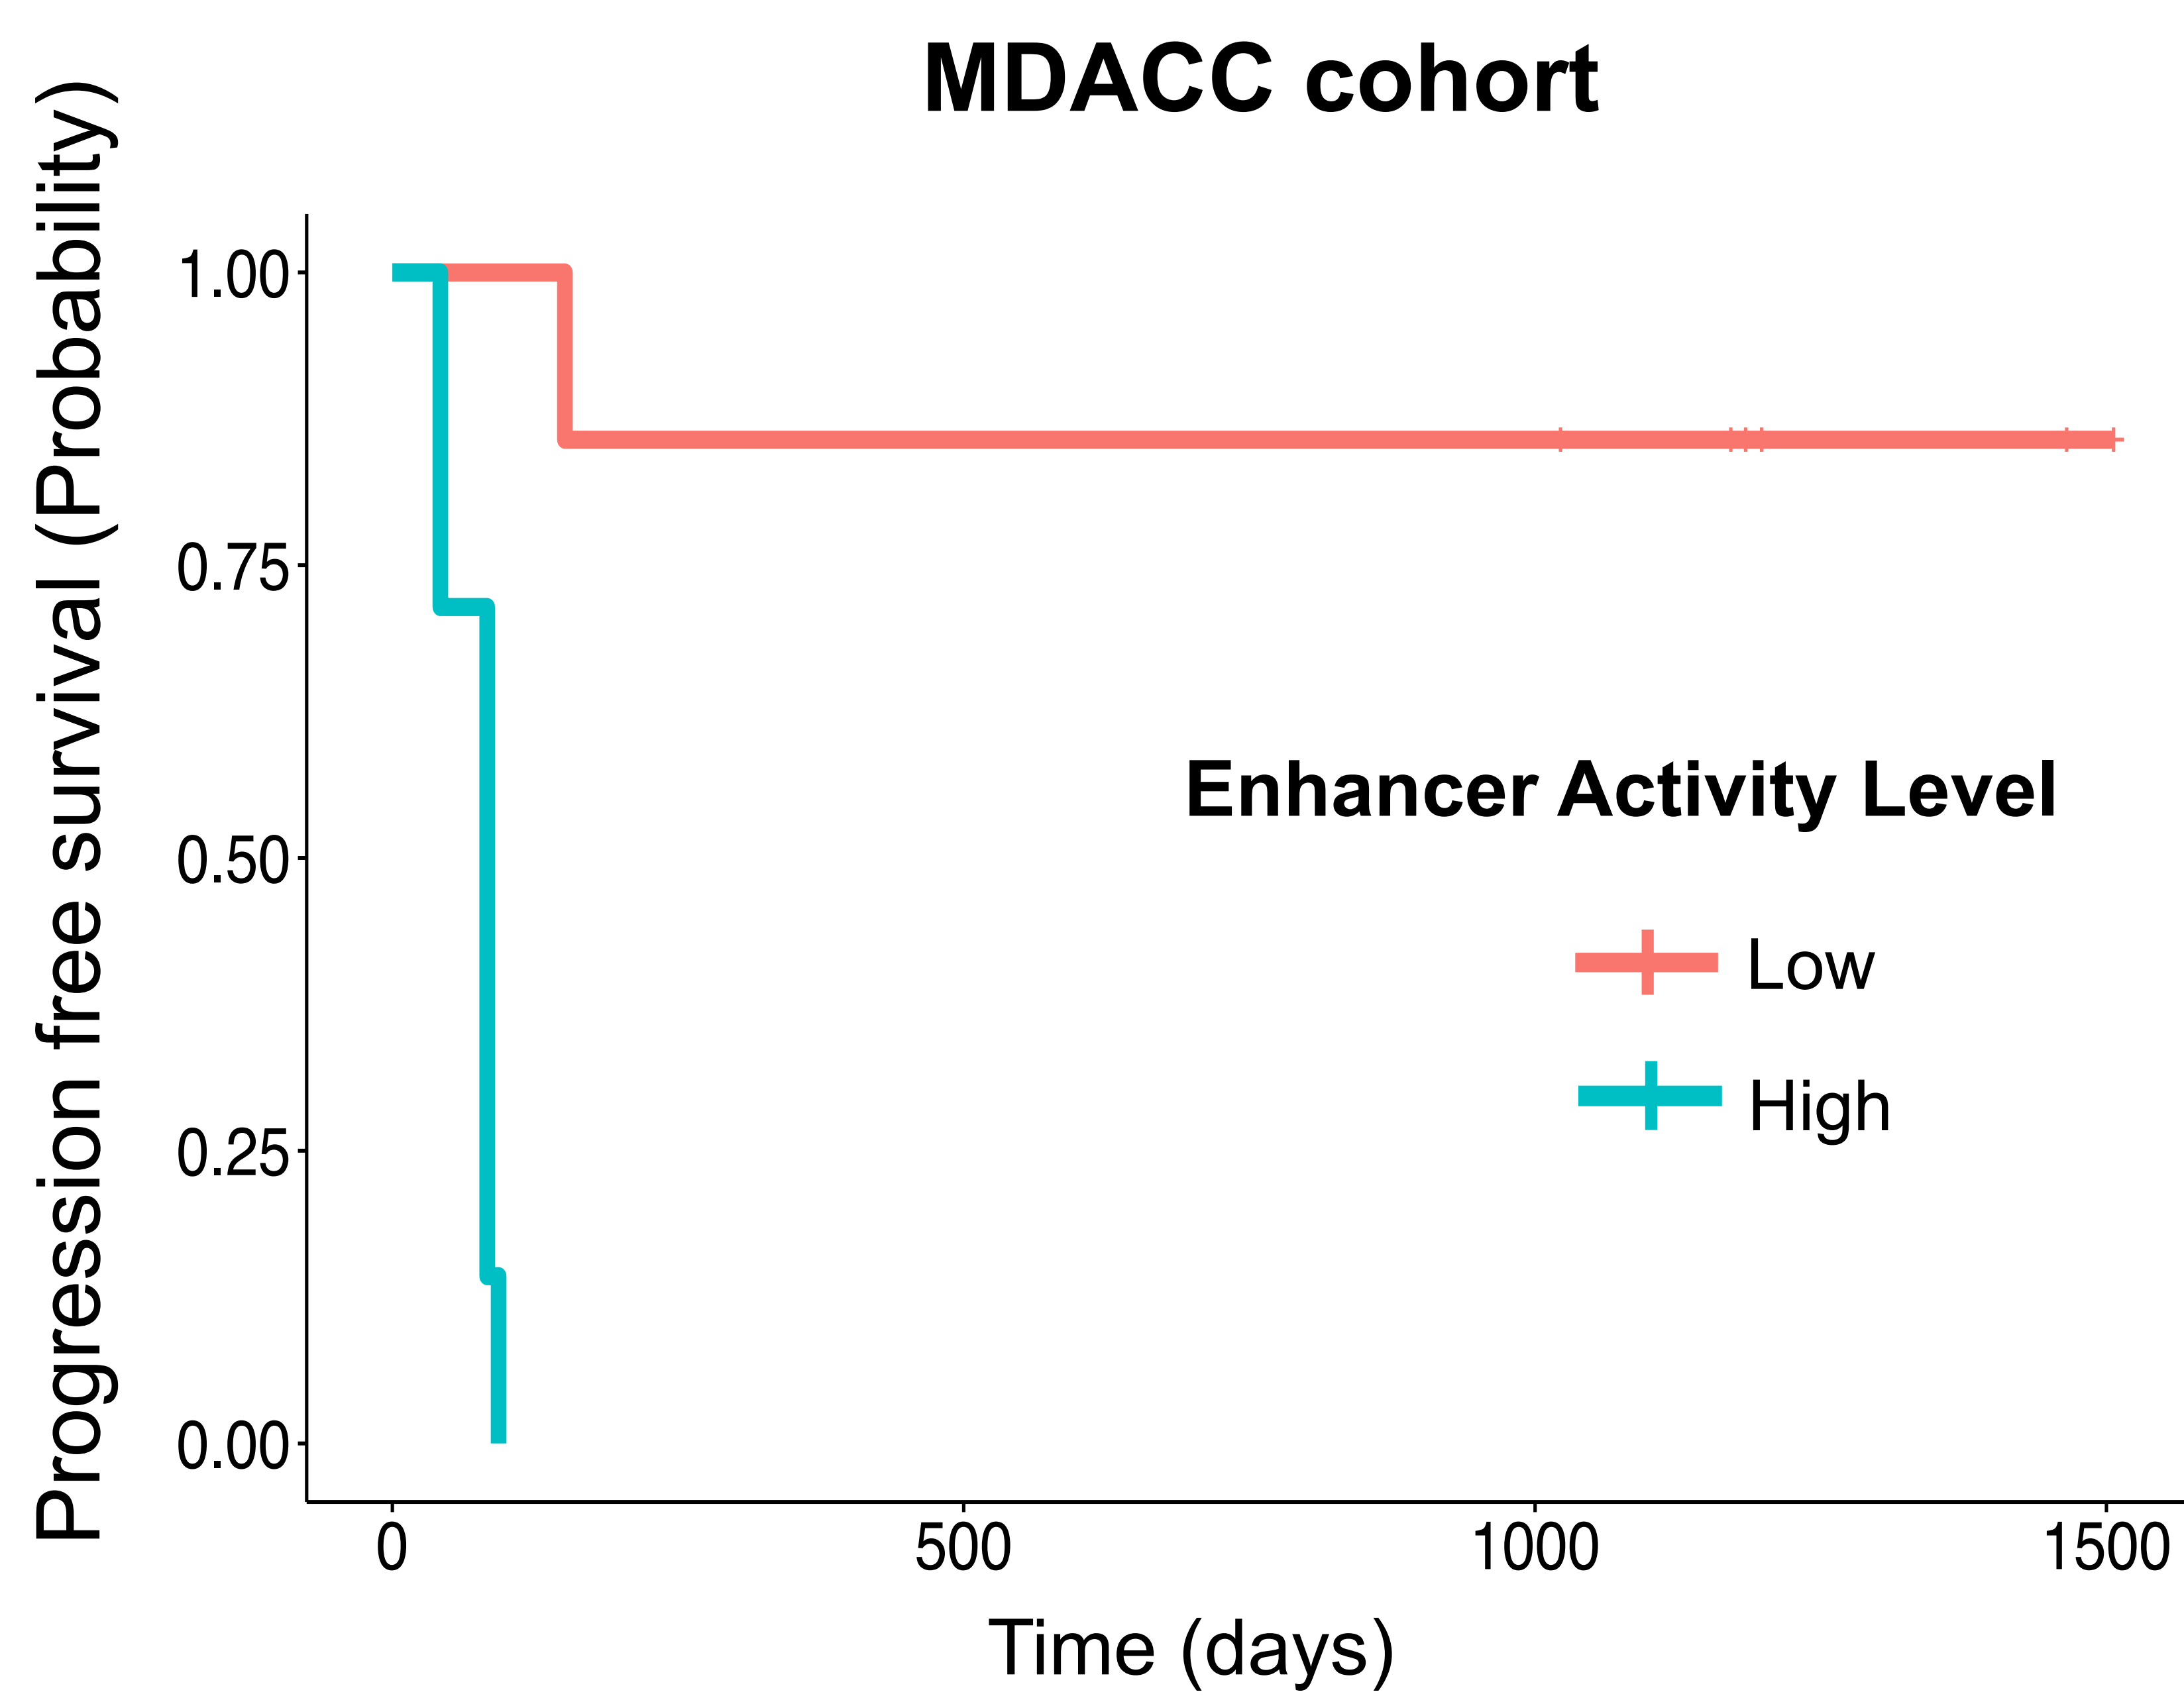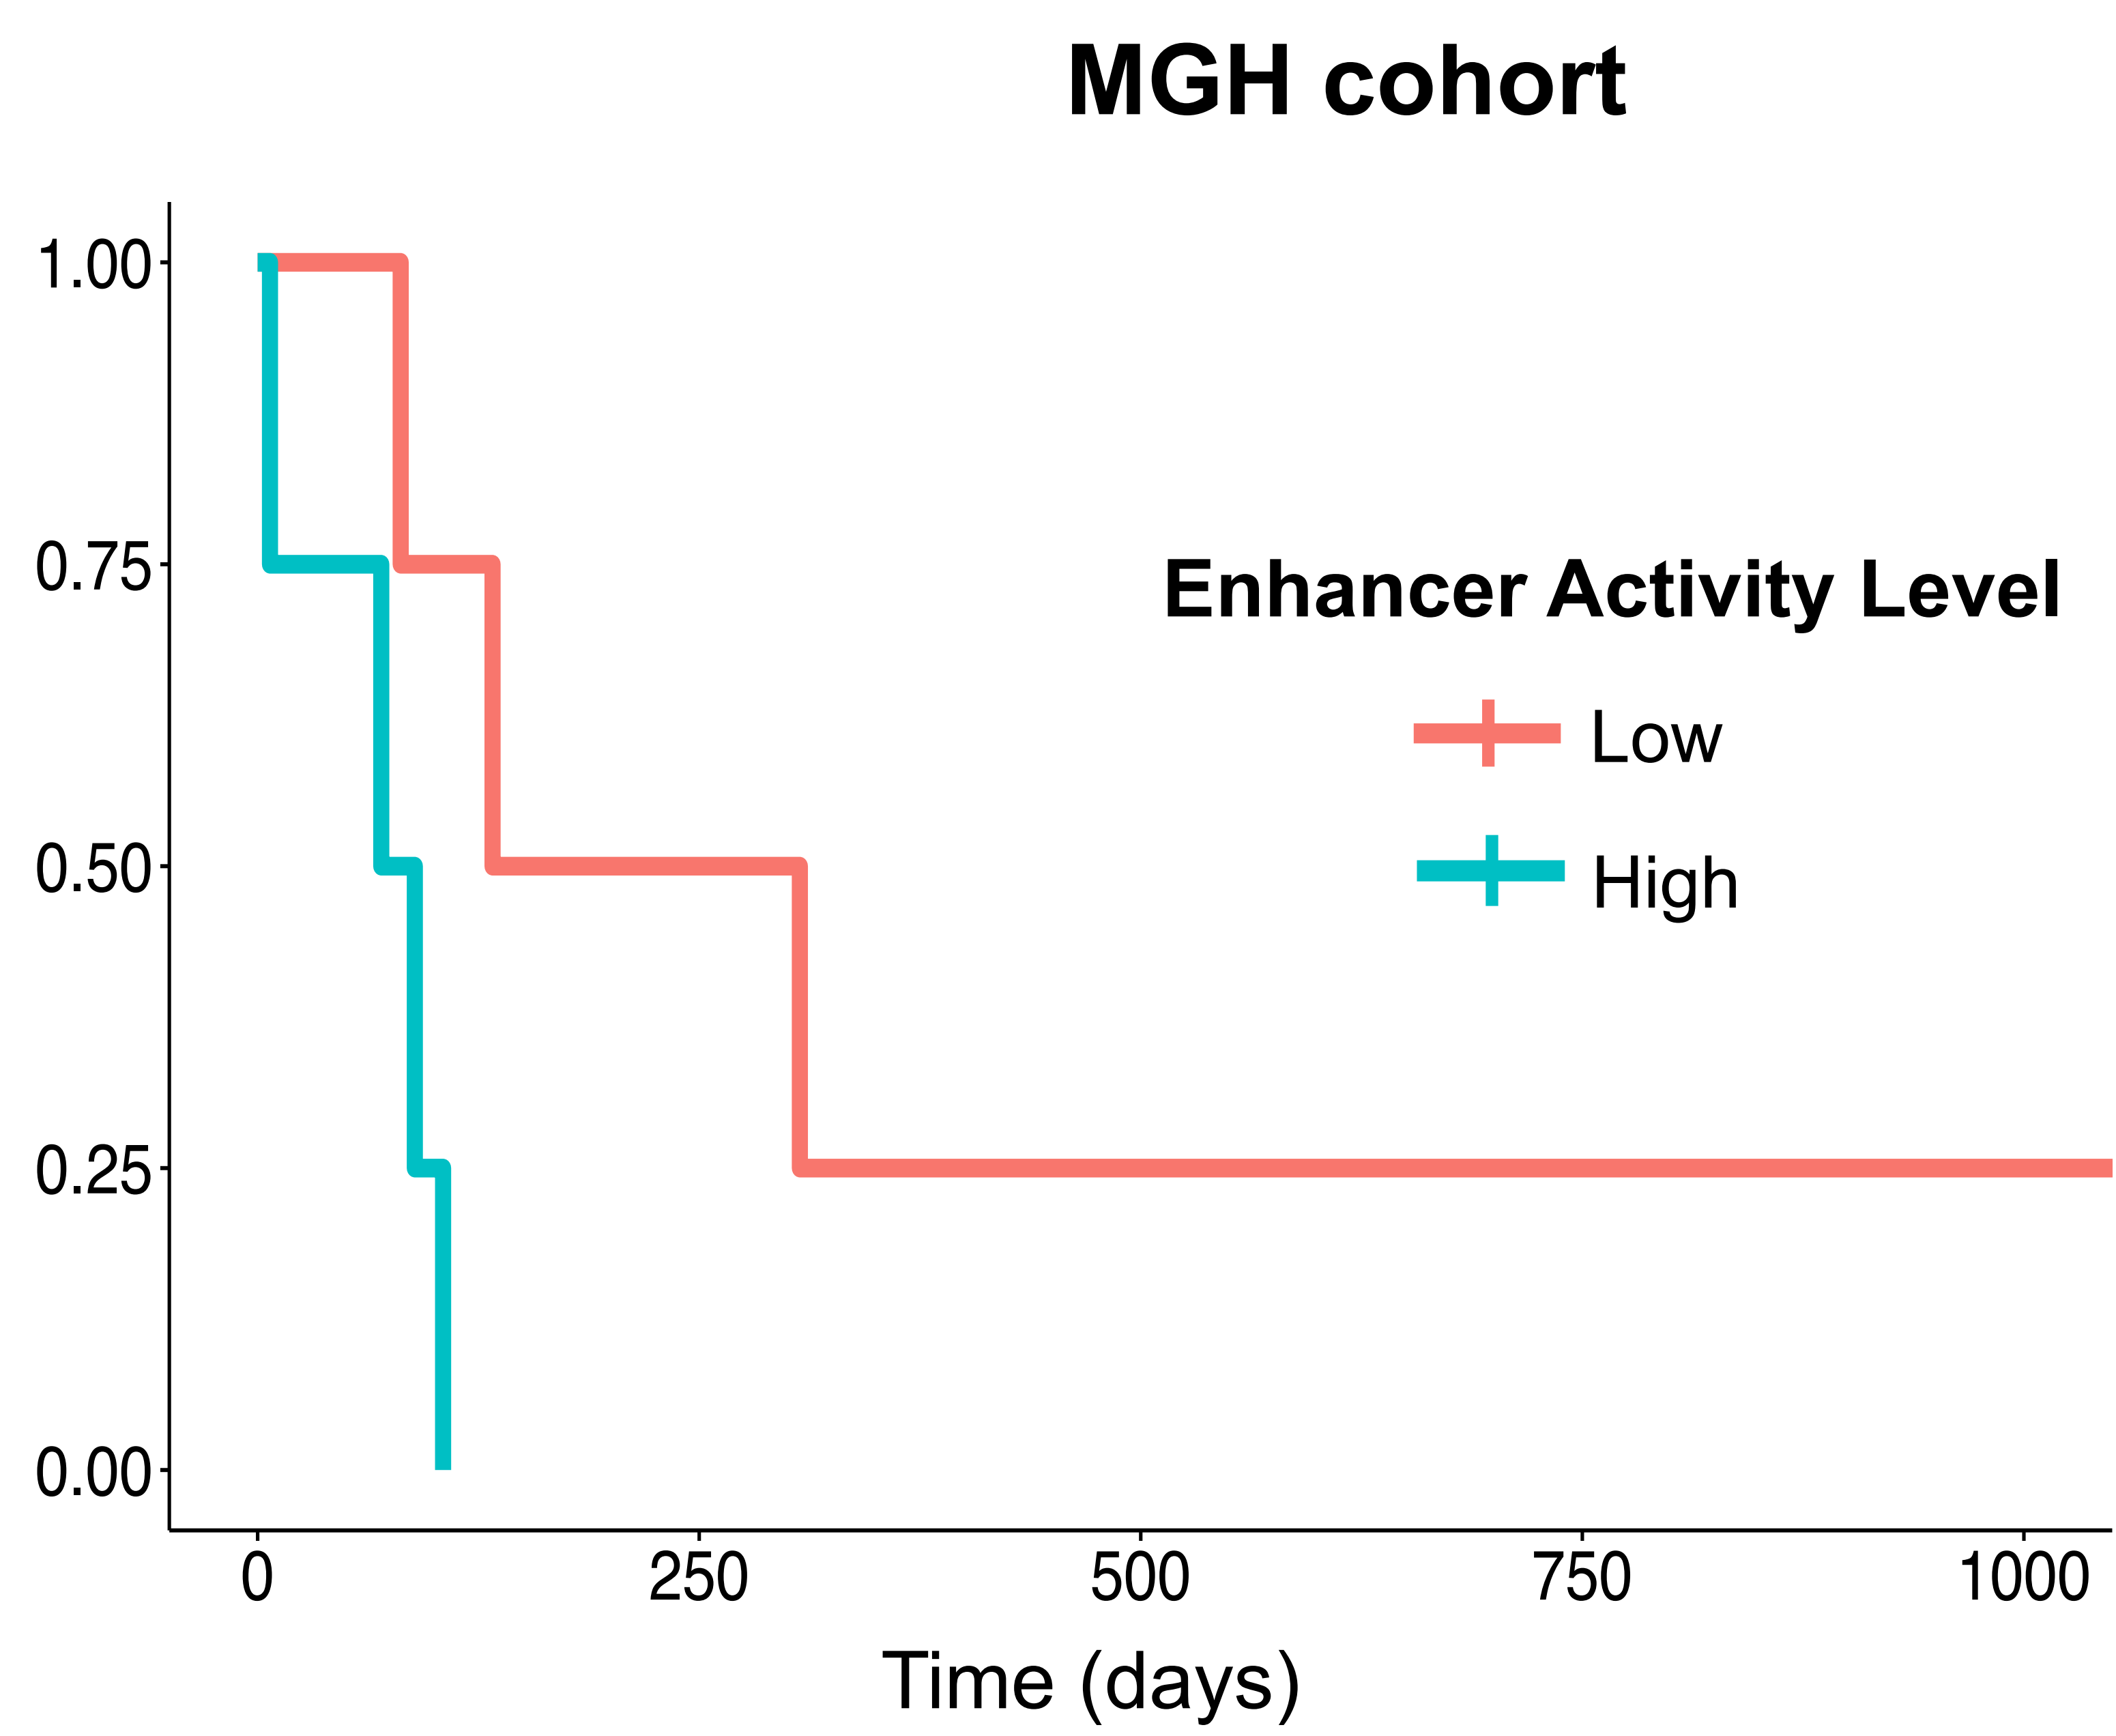

A.

## Replicated Peaks (MDACC vs MGH) (N = 966, p &lt; 0.1)

## Overlap with Patient-Derived

| Melanoma Cells                       |          | TILs                                |          |
|--------------------------------------|----------|-------------------------------------|----------|
| Pathway                              | p-value  | Pathway                             | p-value  |
| AKT Signaling                        | 2.19E-05 | Allograft Rejection                 | 2.55E-10 |
| MAPK Pathway                         | 3.70E-05 | Antigen Presentation and Processing | 3.57E-08 |
| VEGF Signaling                       | 4.15E-05 | Interferon gamma signaling          | 1.10E-07 |
| Cellular Senescence                  | 6.69E-05 | Th1 and Th2 Differentiation         | 2.02E-07 |
| Interferon gamma signaling           | 2.00E-04 | Th17 Cell Differentiation           | 2.47E-07 |
| Epithelial-to-Mesenchymal Transition | 1.80E-03 | Cytokine Signaling in Immune System | 5.35E-07 |
| TGFb Signaling                       | 7.50E-03 | PD1 Signaling                       | 7.60E-05 |

N = 270 peaks

N = 110 peaks

B.

| MOTIF | TF     | p-value  |
|-------|--------|----------|
|       | ZNF189 | 1.00E-03 |
|       | NUR77  | 1.00E-02 |
|       | ESRRB  | 1.00E-02 |
|       | BCL6   | 1.00E-02 |

| MOTIF | TF     | p-value  |
|-------|--------|----------|
|       | ZNF165 | 1.00E-03 |
|       | ZNF322 | 1.00E-02 |
|       | TBX20  | 1.00E-02 |
|       | SMAD4  | 1.00E-02 |
|       | HOXA10 | 1.00E-02 |
|       | ETS    | 1.00E-02 |
|       | STAT4  | 1.00E-02 |
|       | IRF1   | 1.00E-02 |

C.

## Melanoma Cell Specific Enhancers

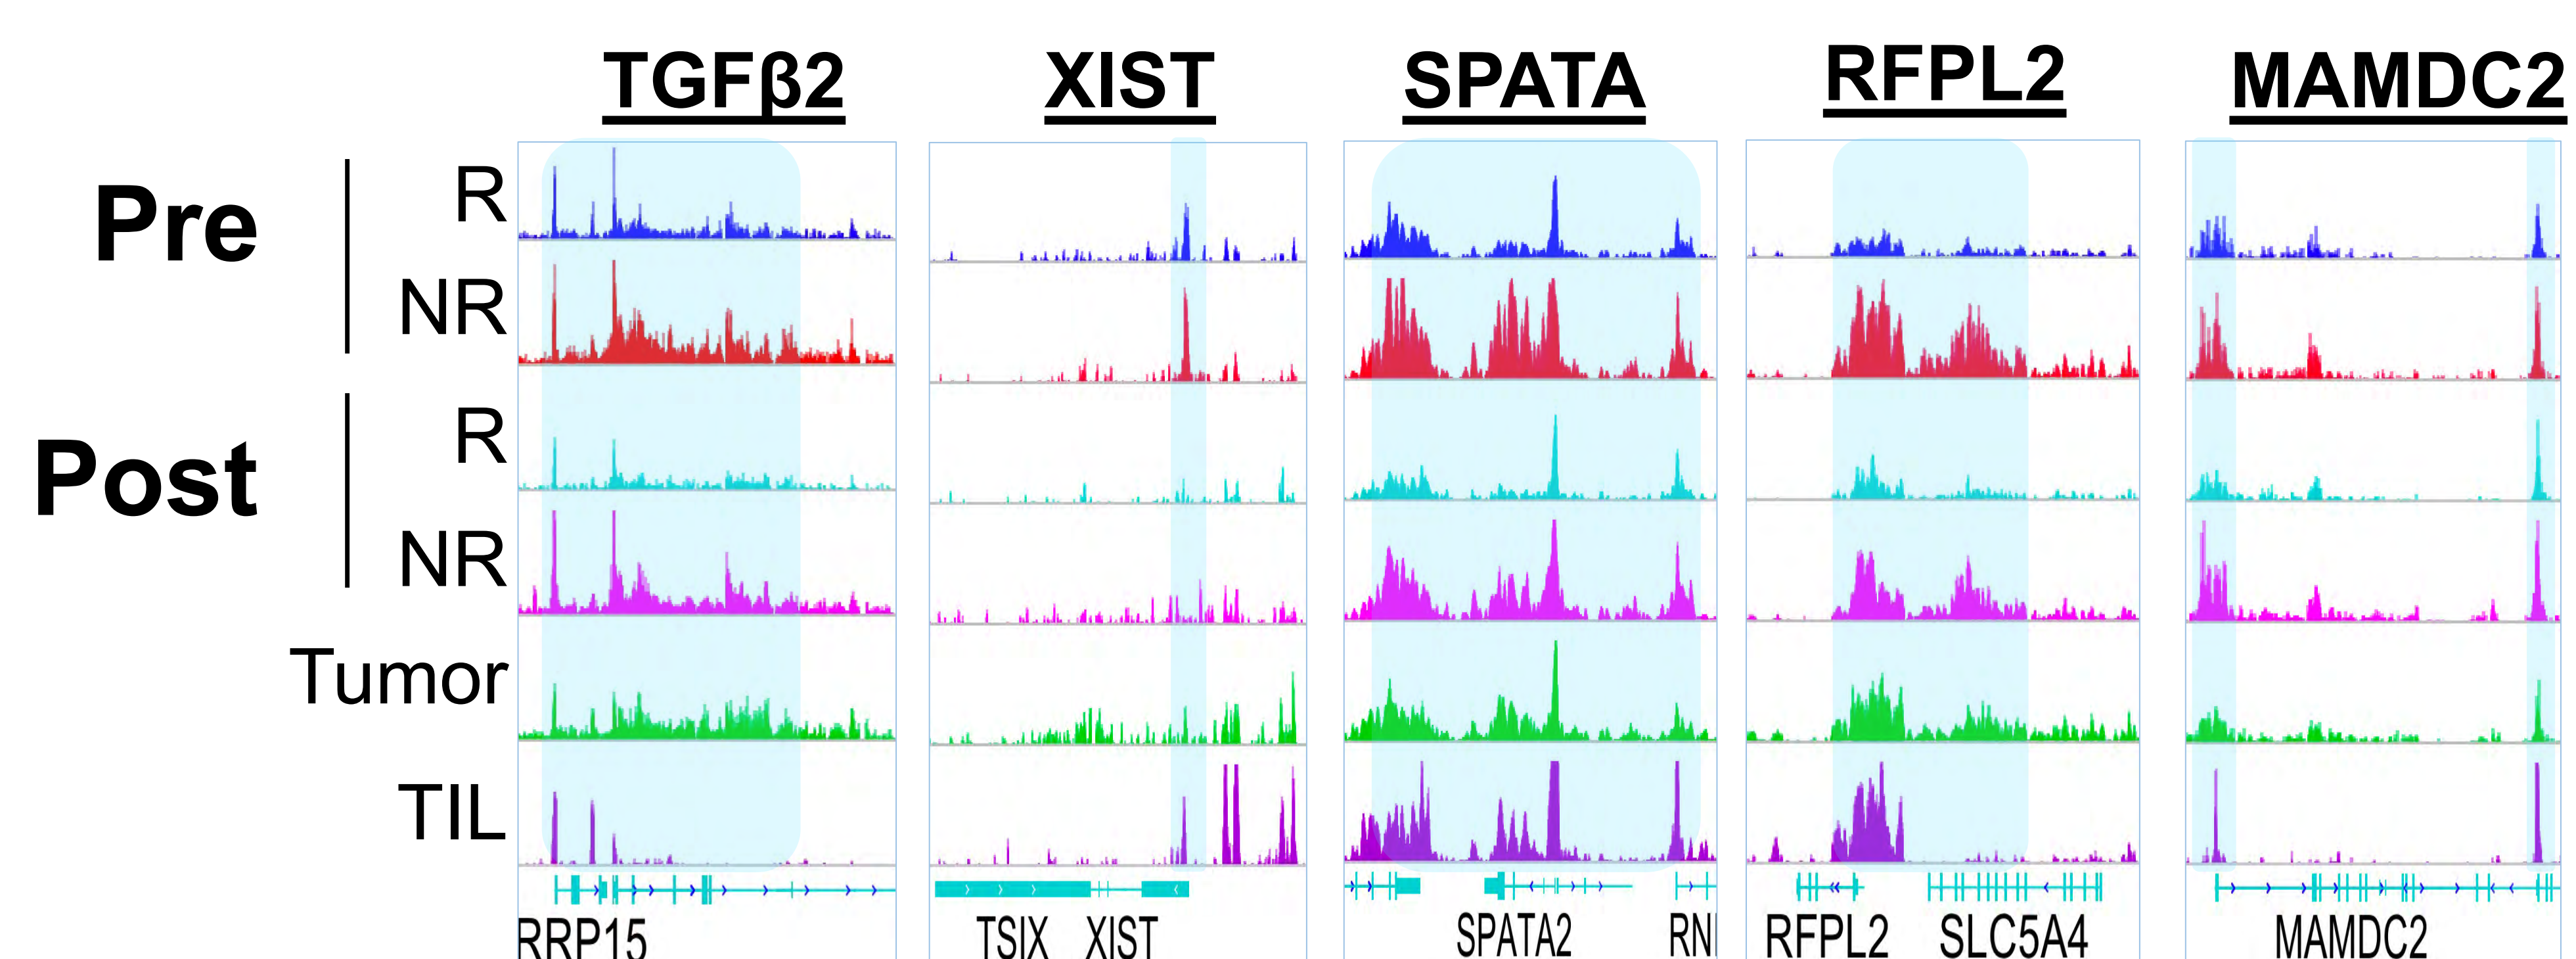

D.

## Target Gene Expression

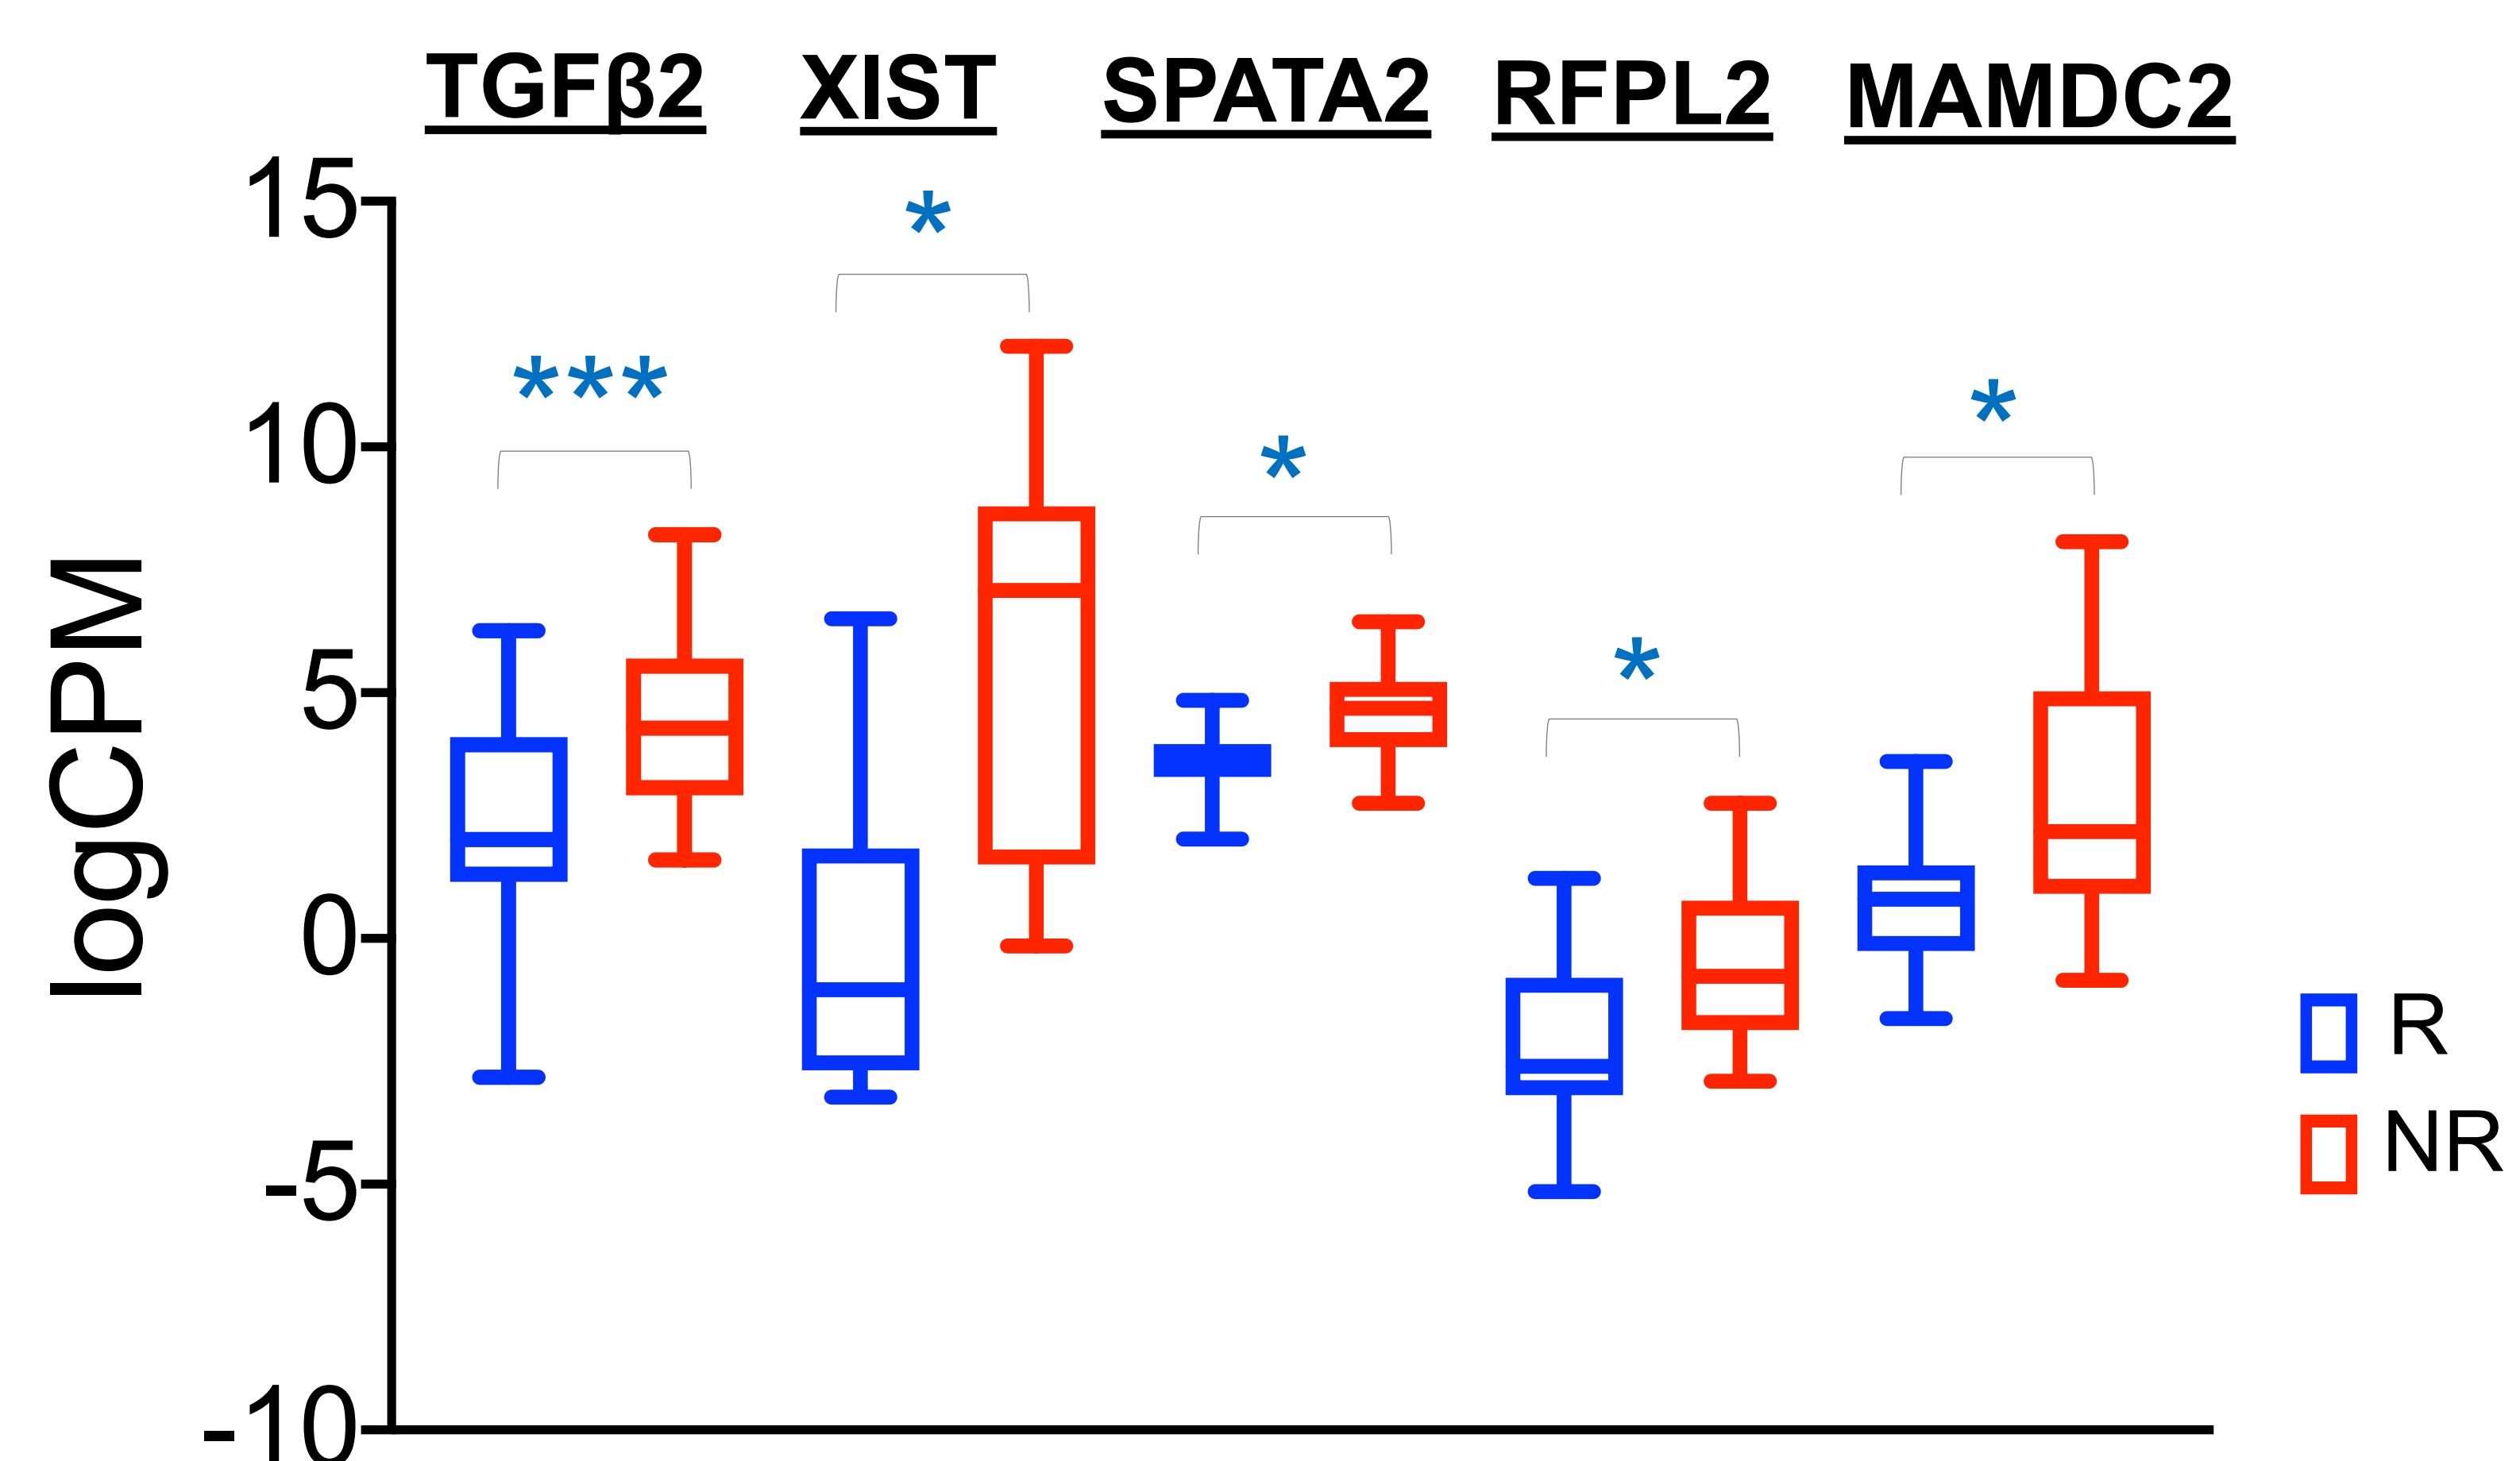

E.

## TIL Specific Enhancers

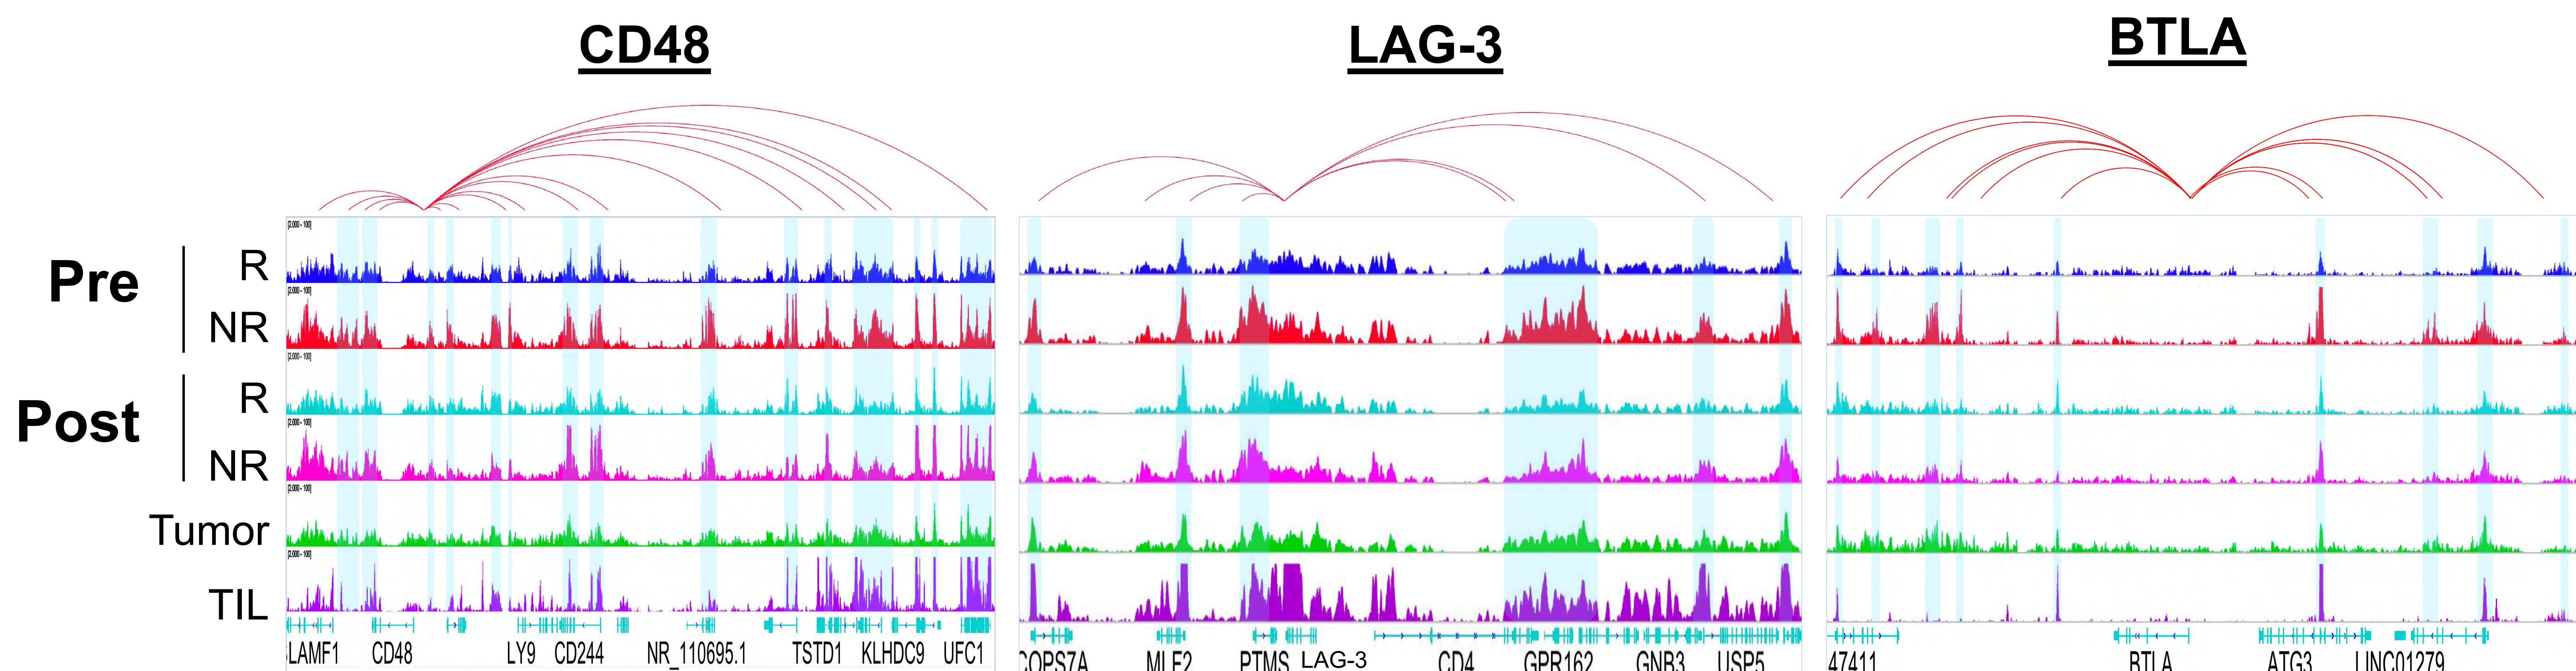

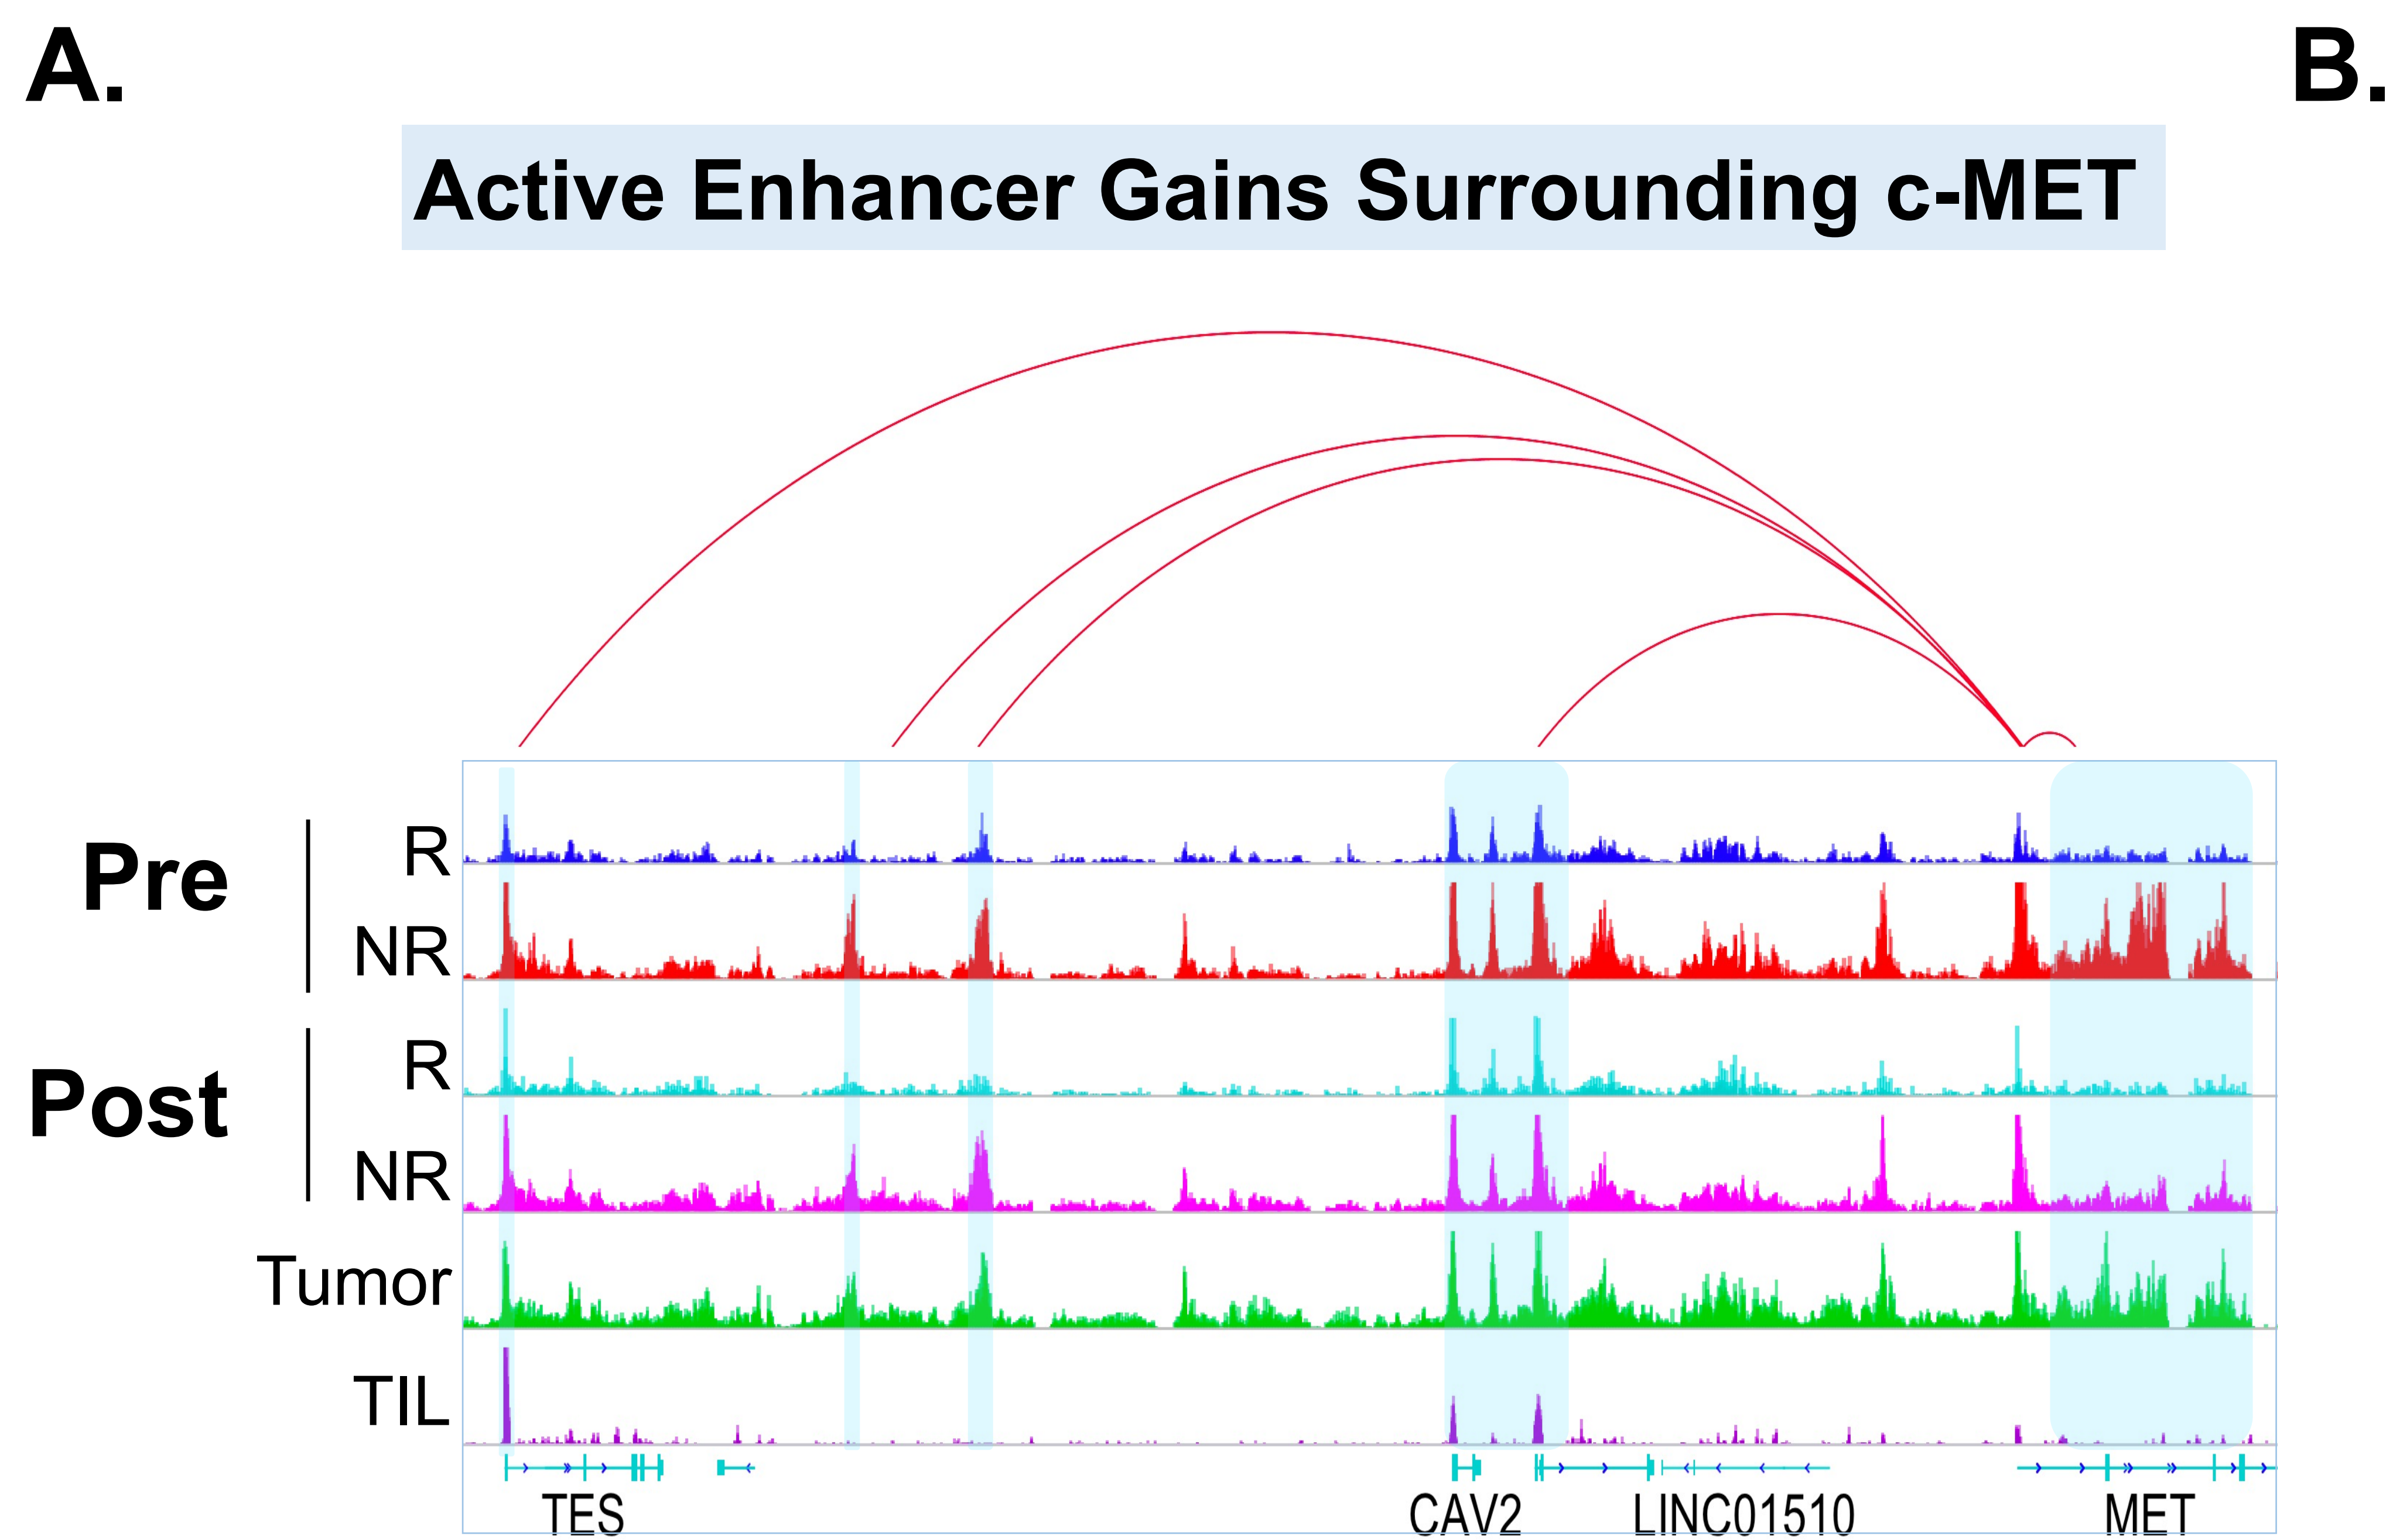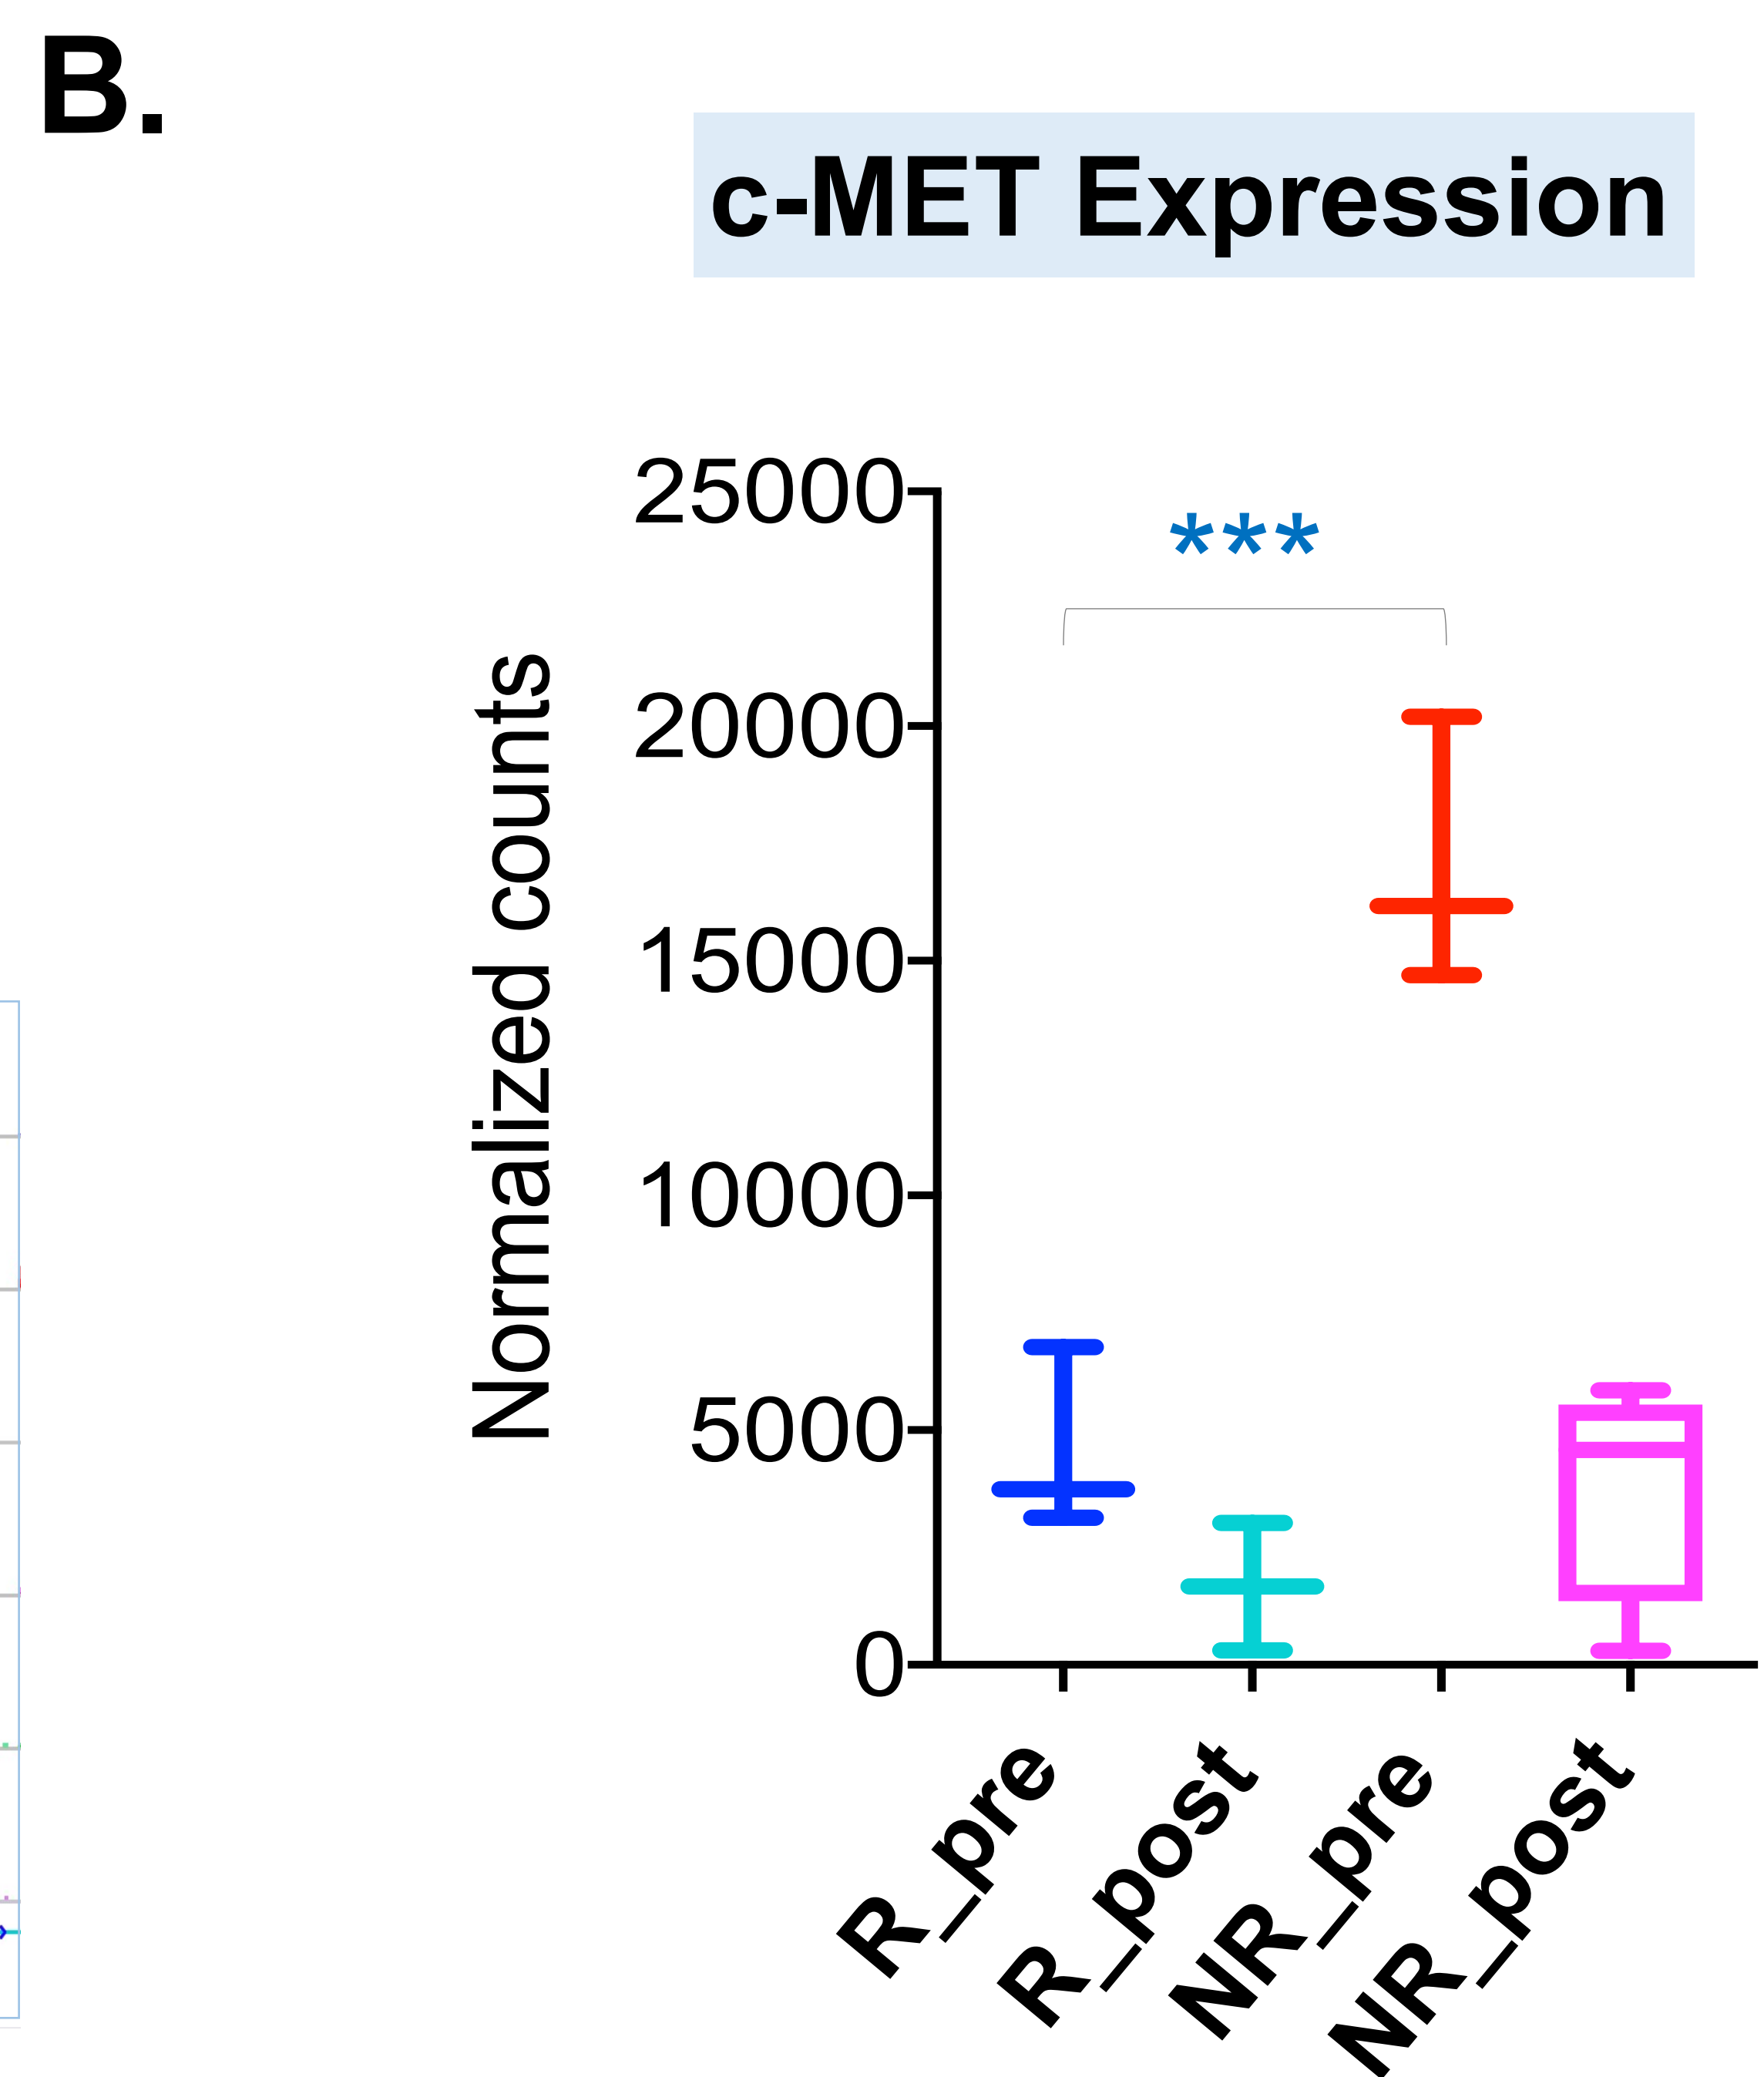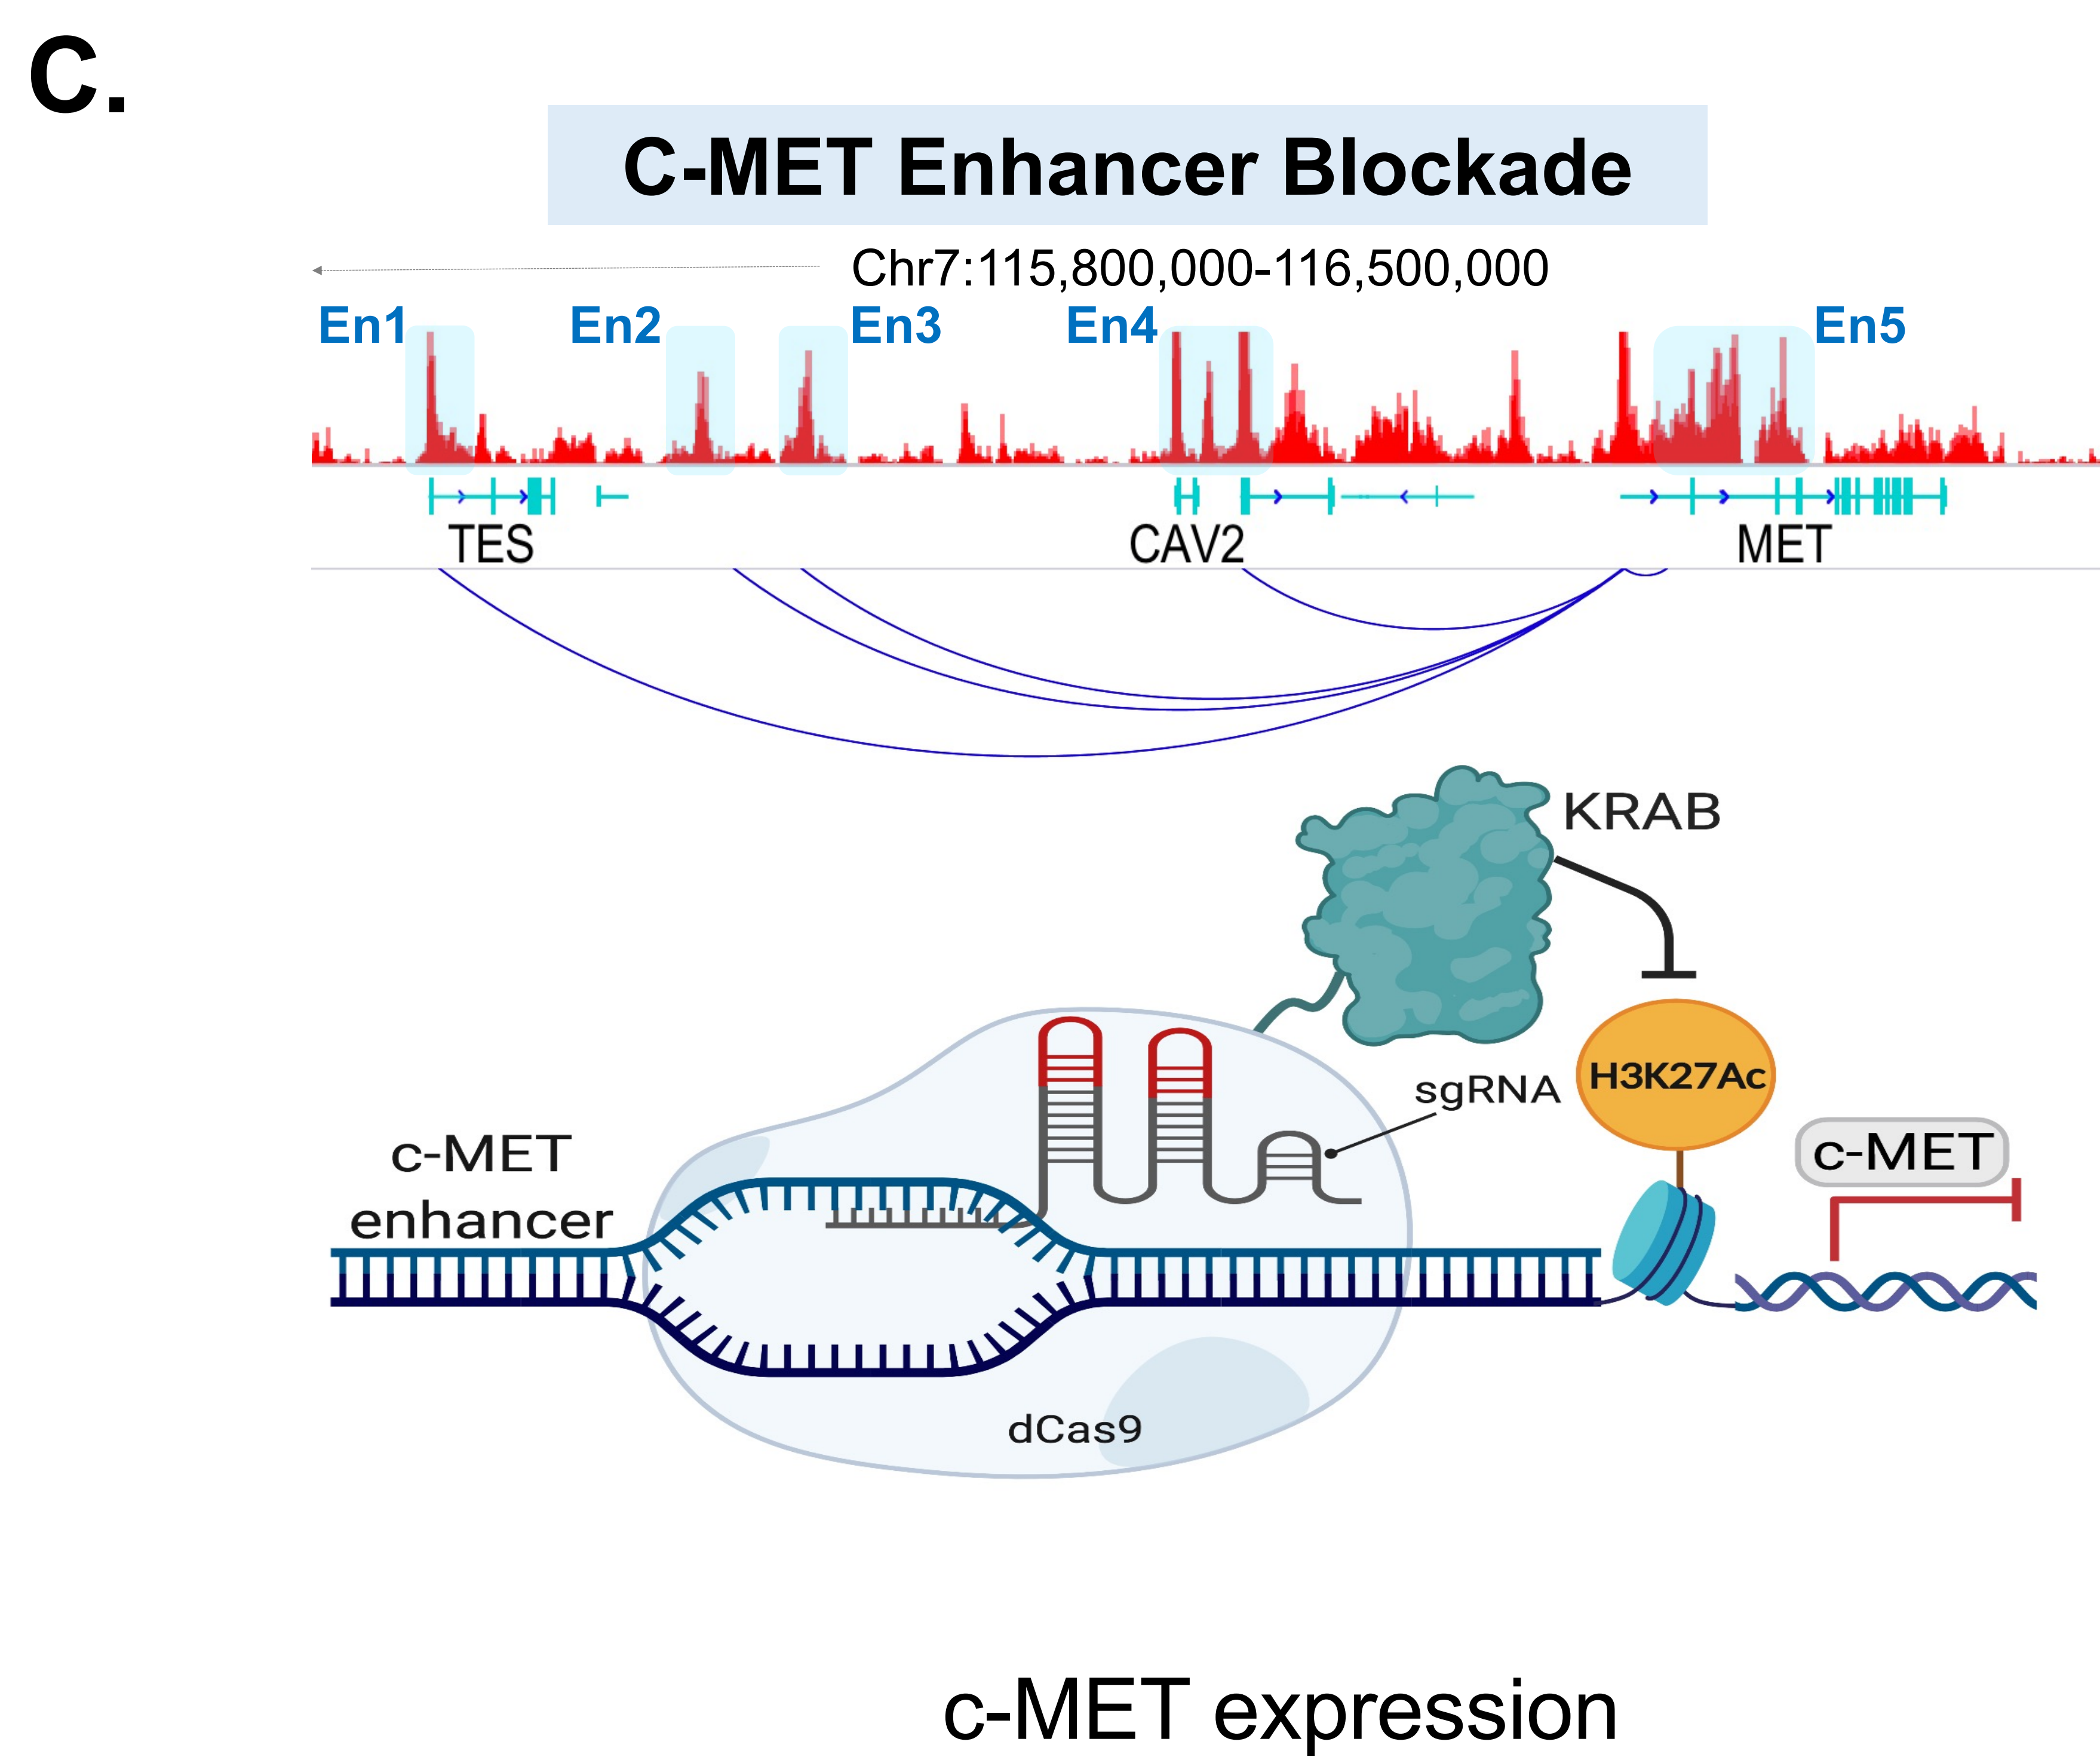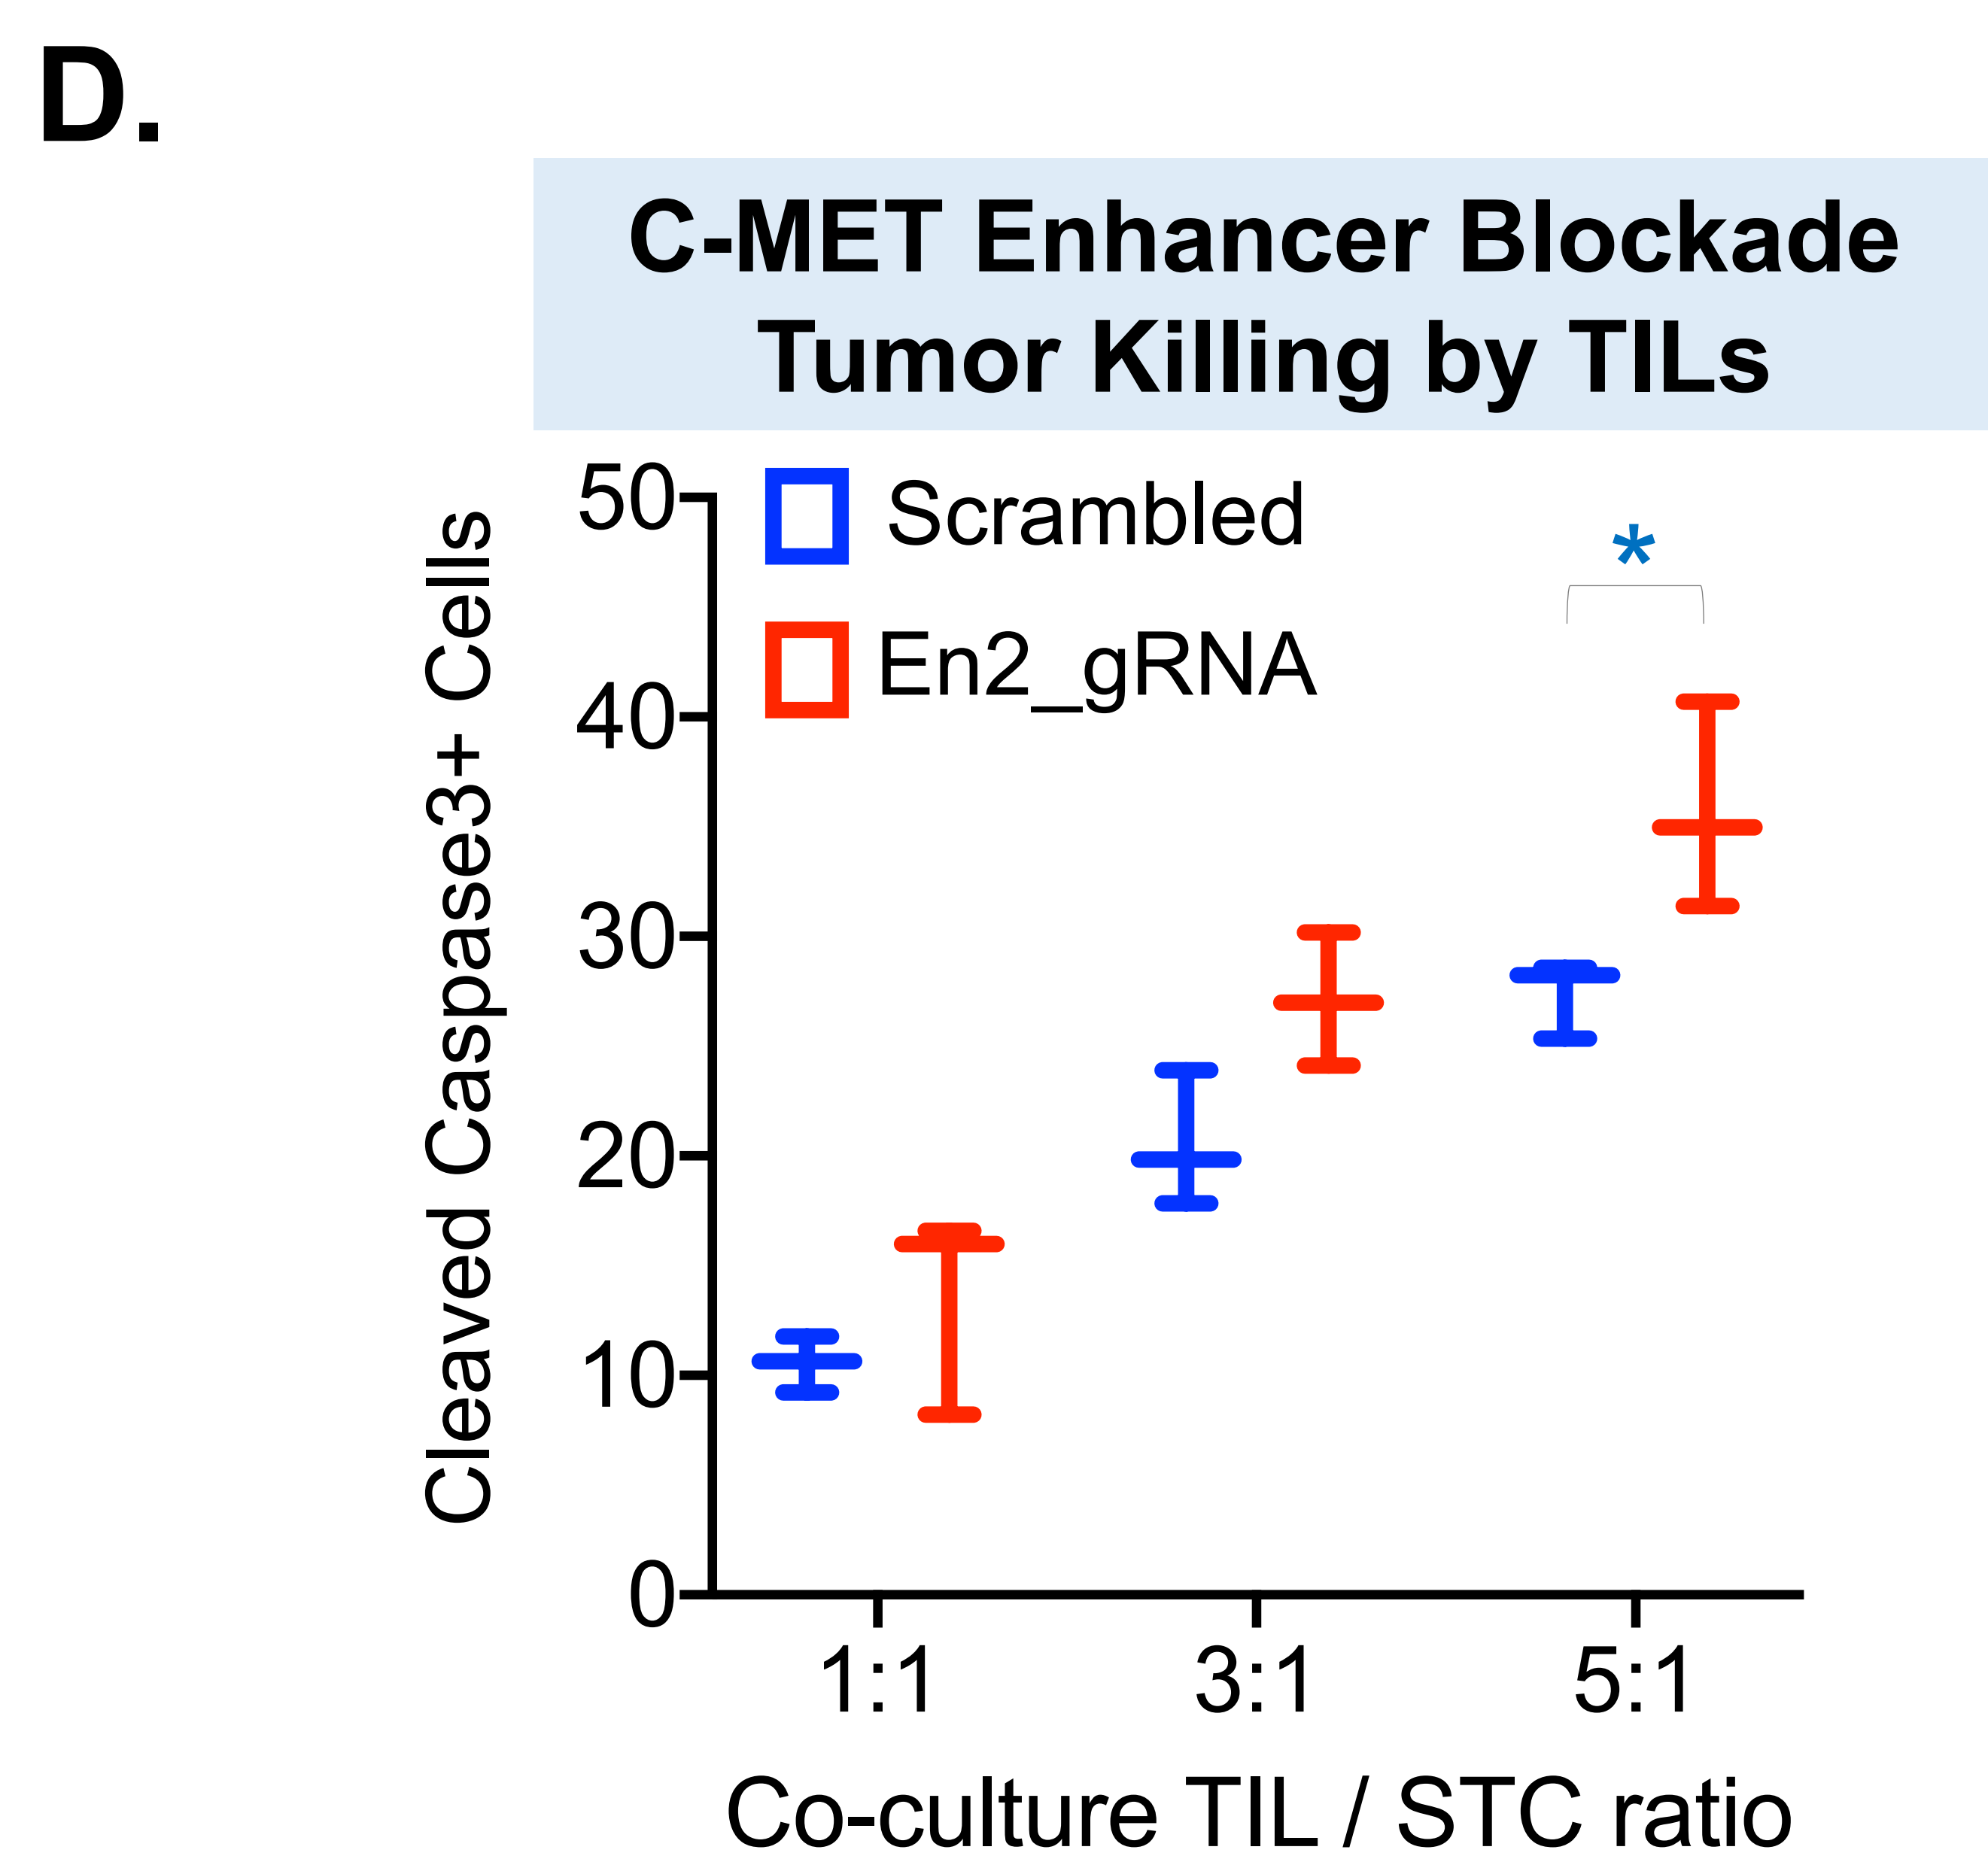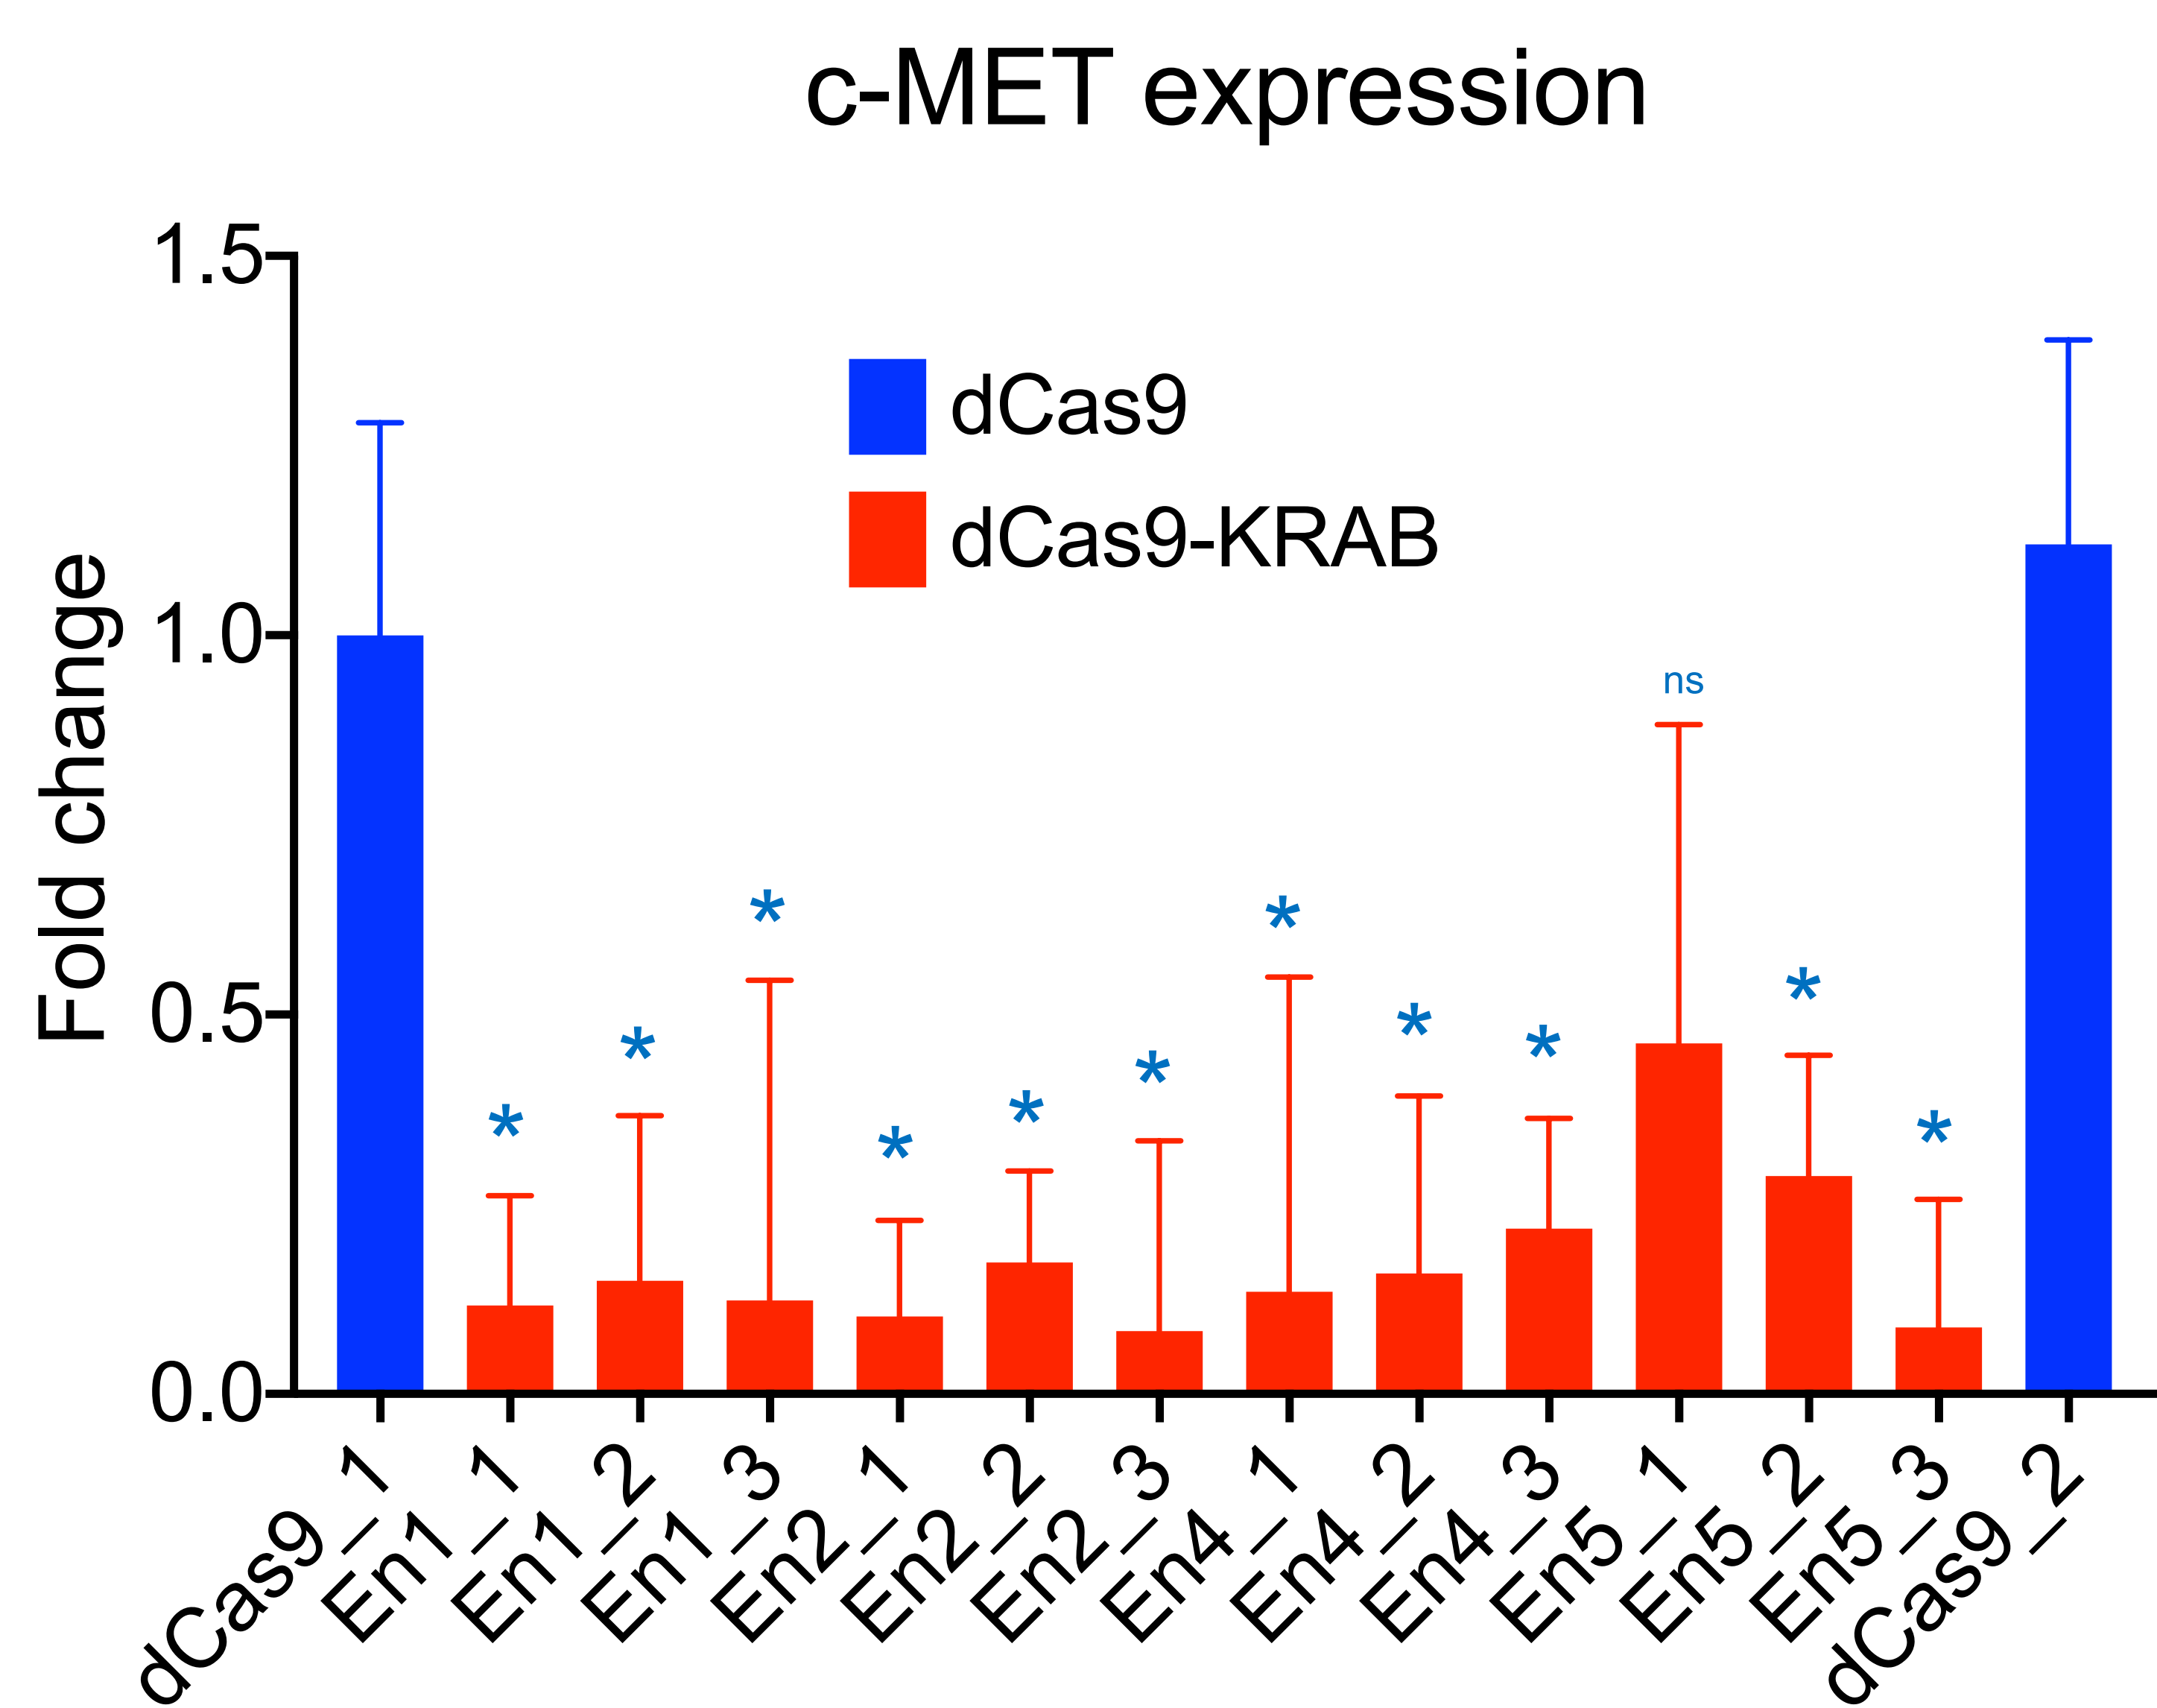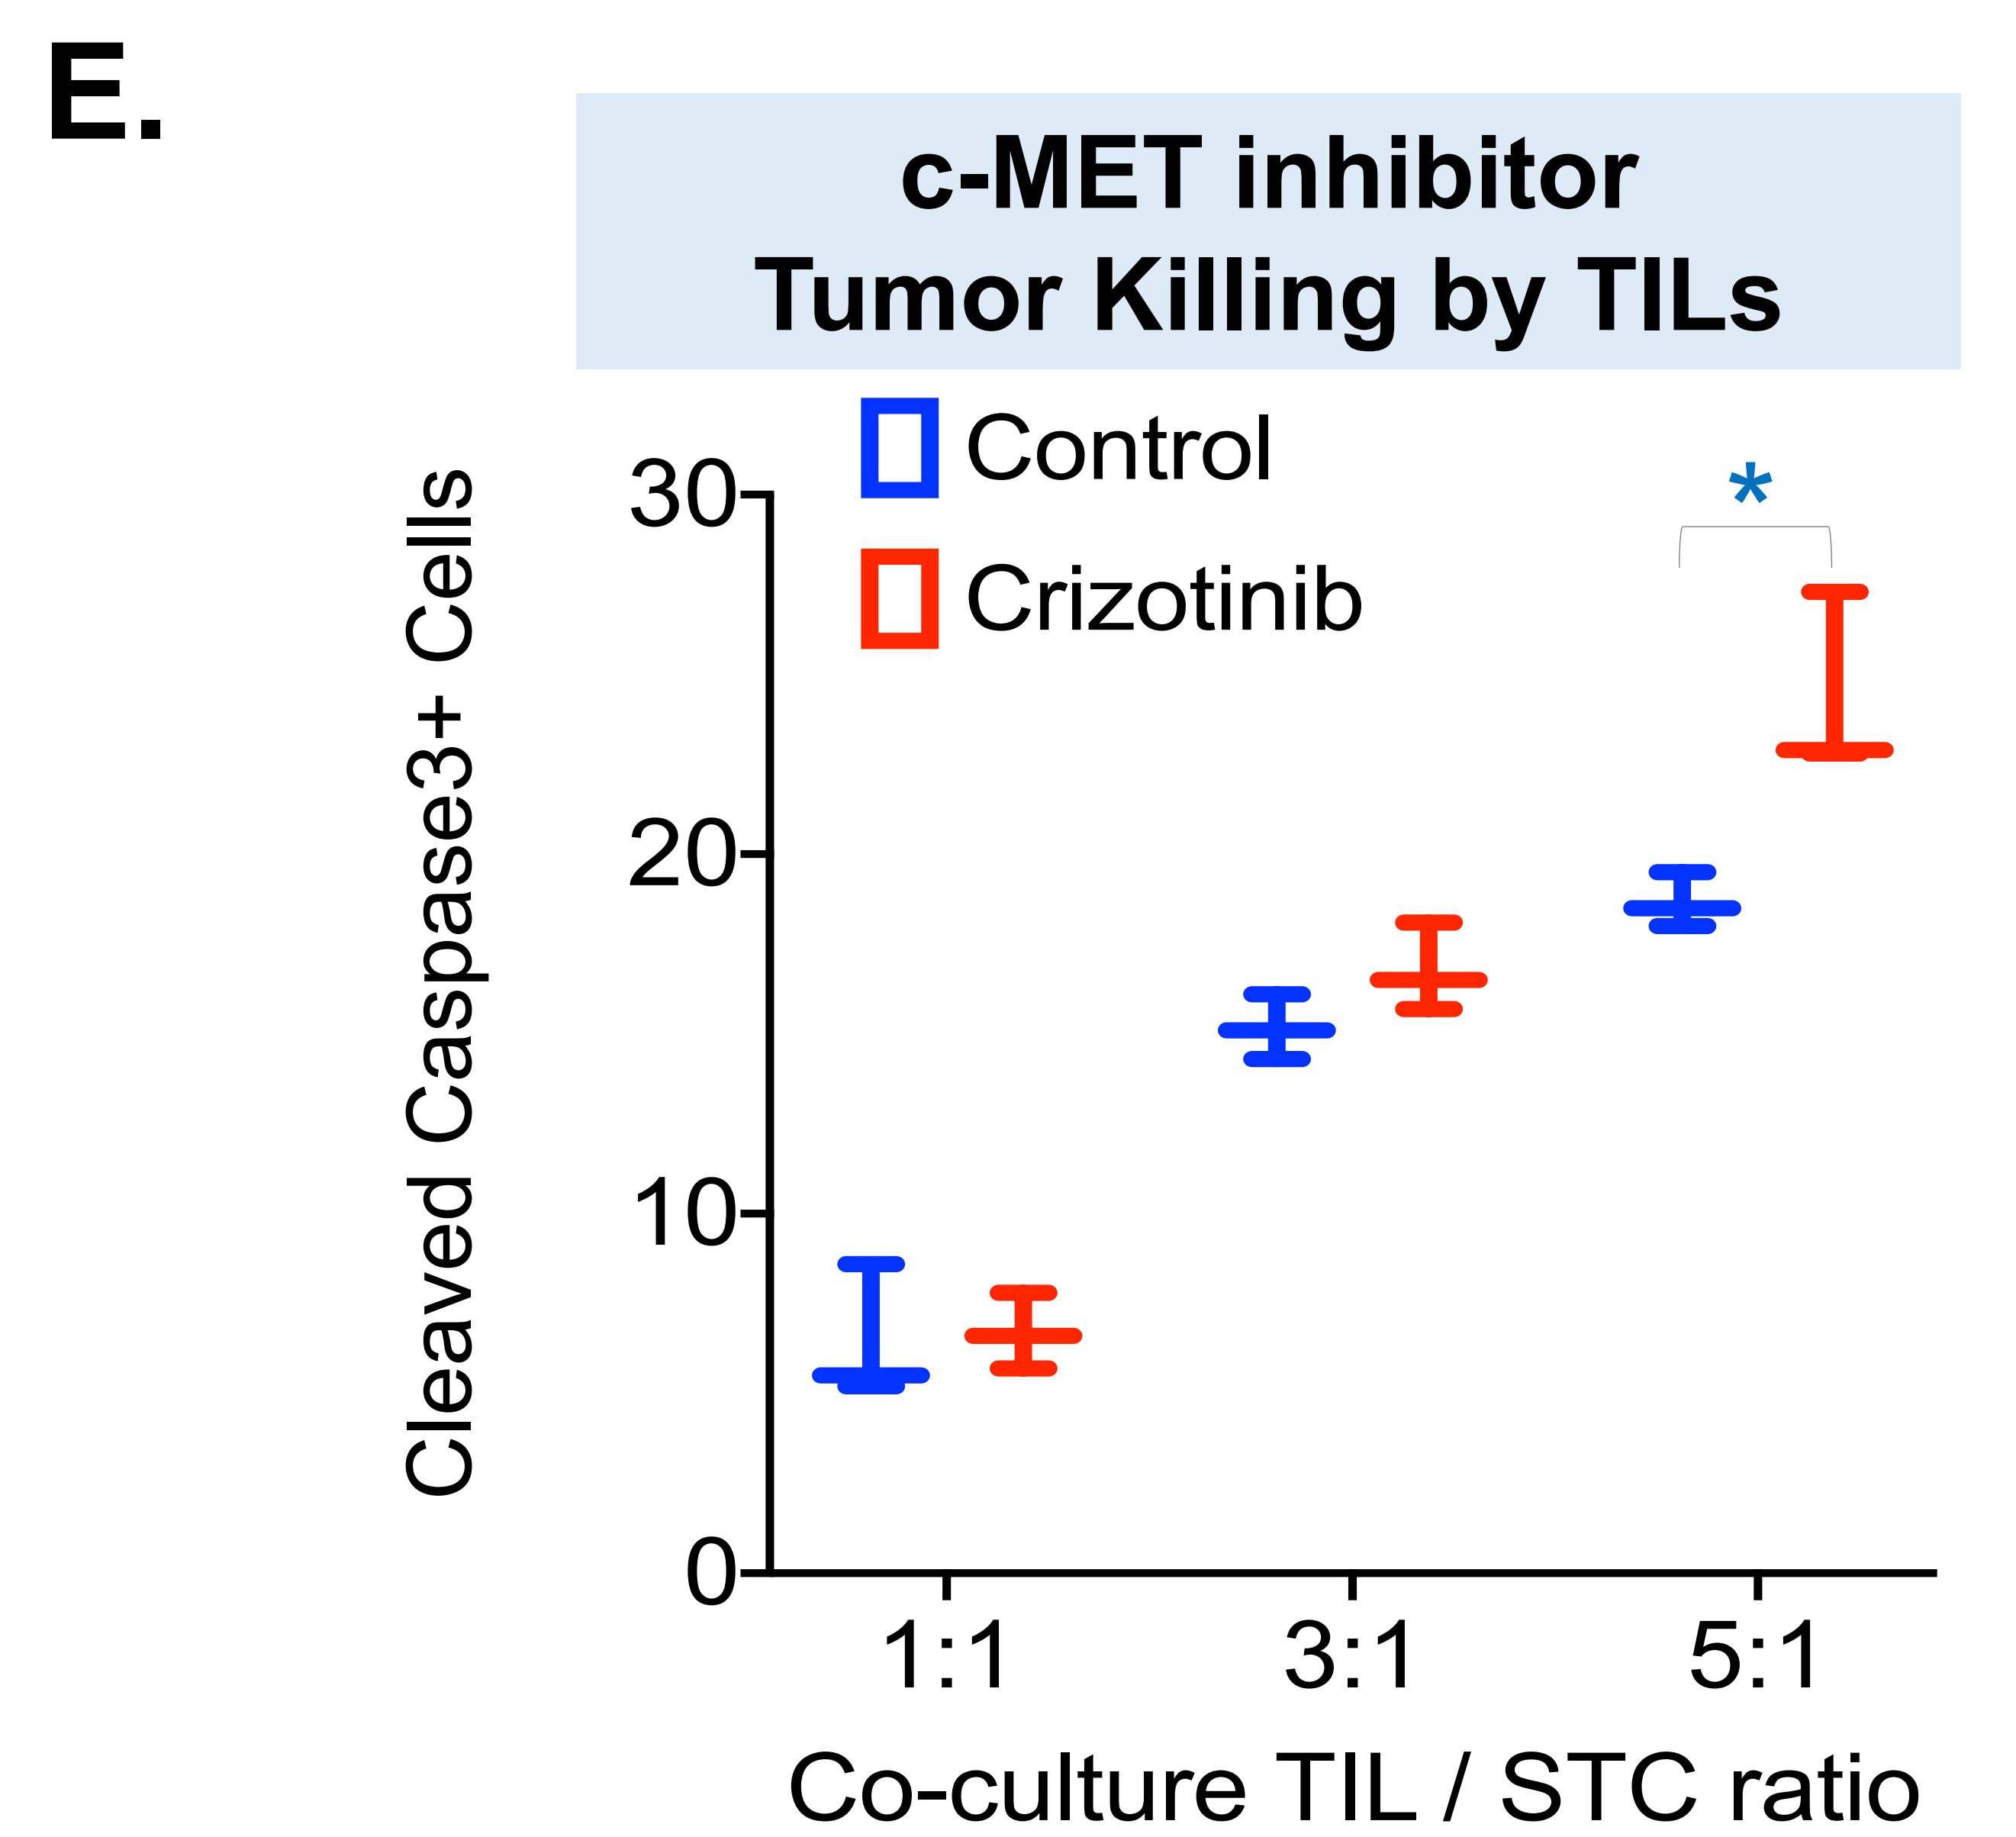



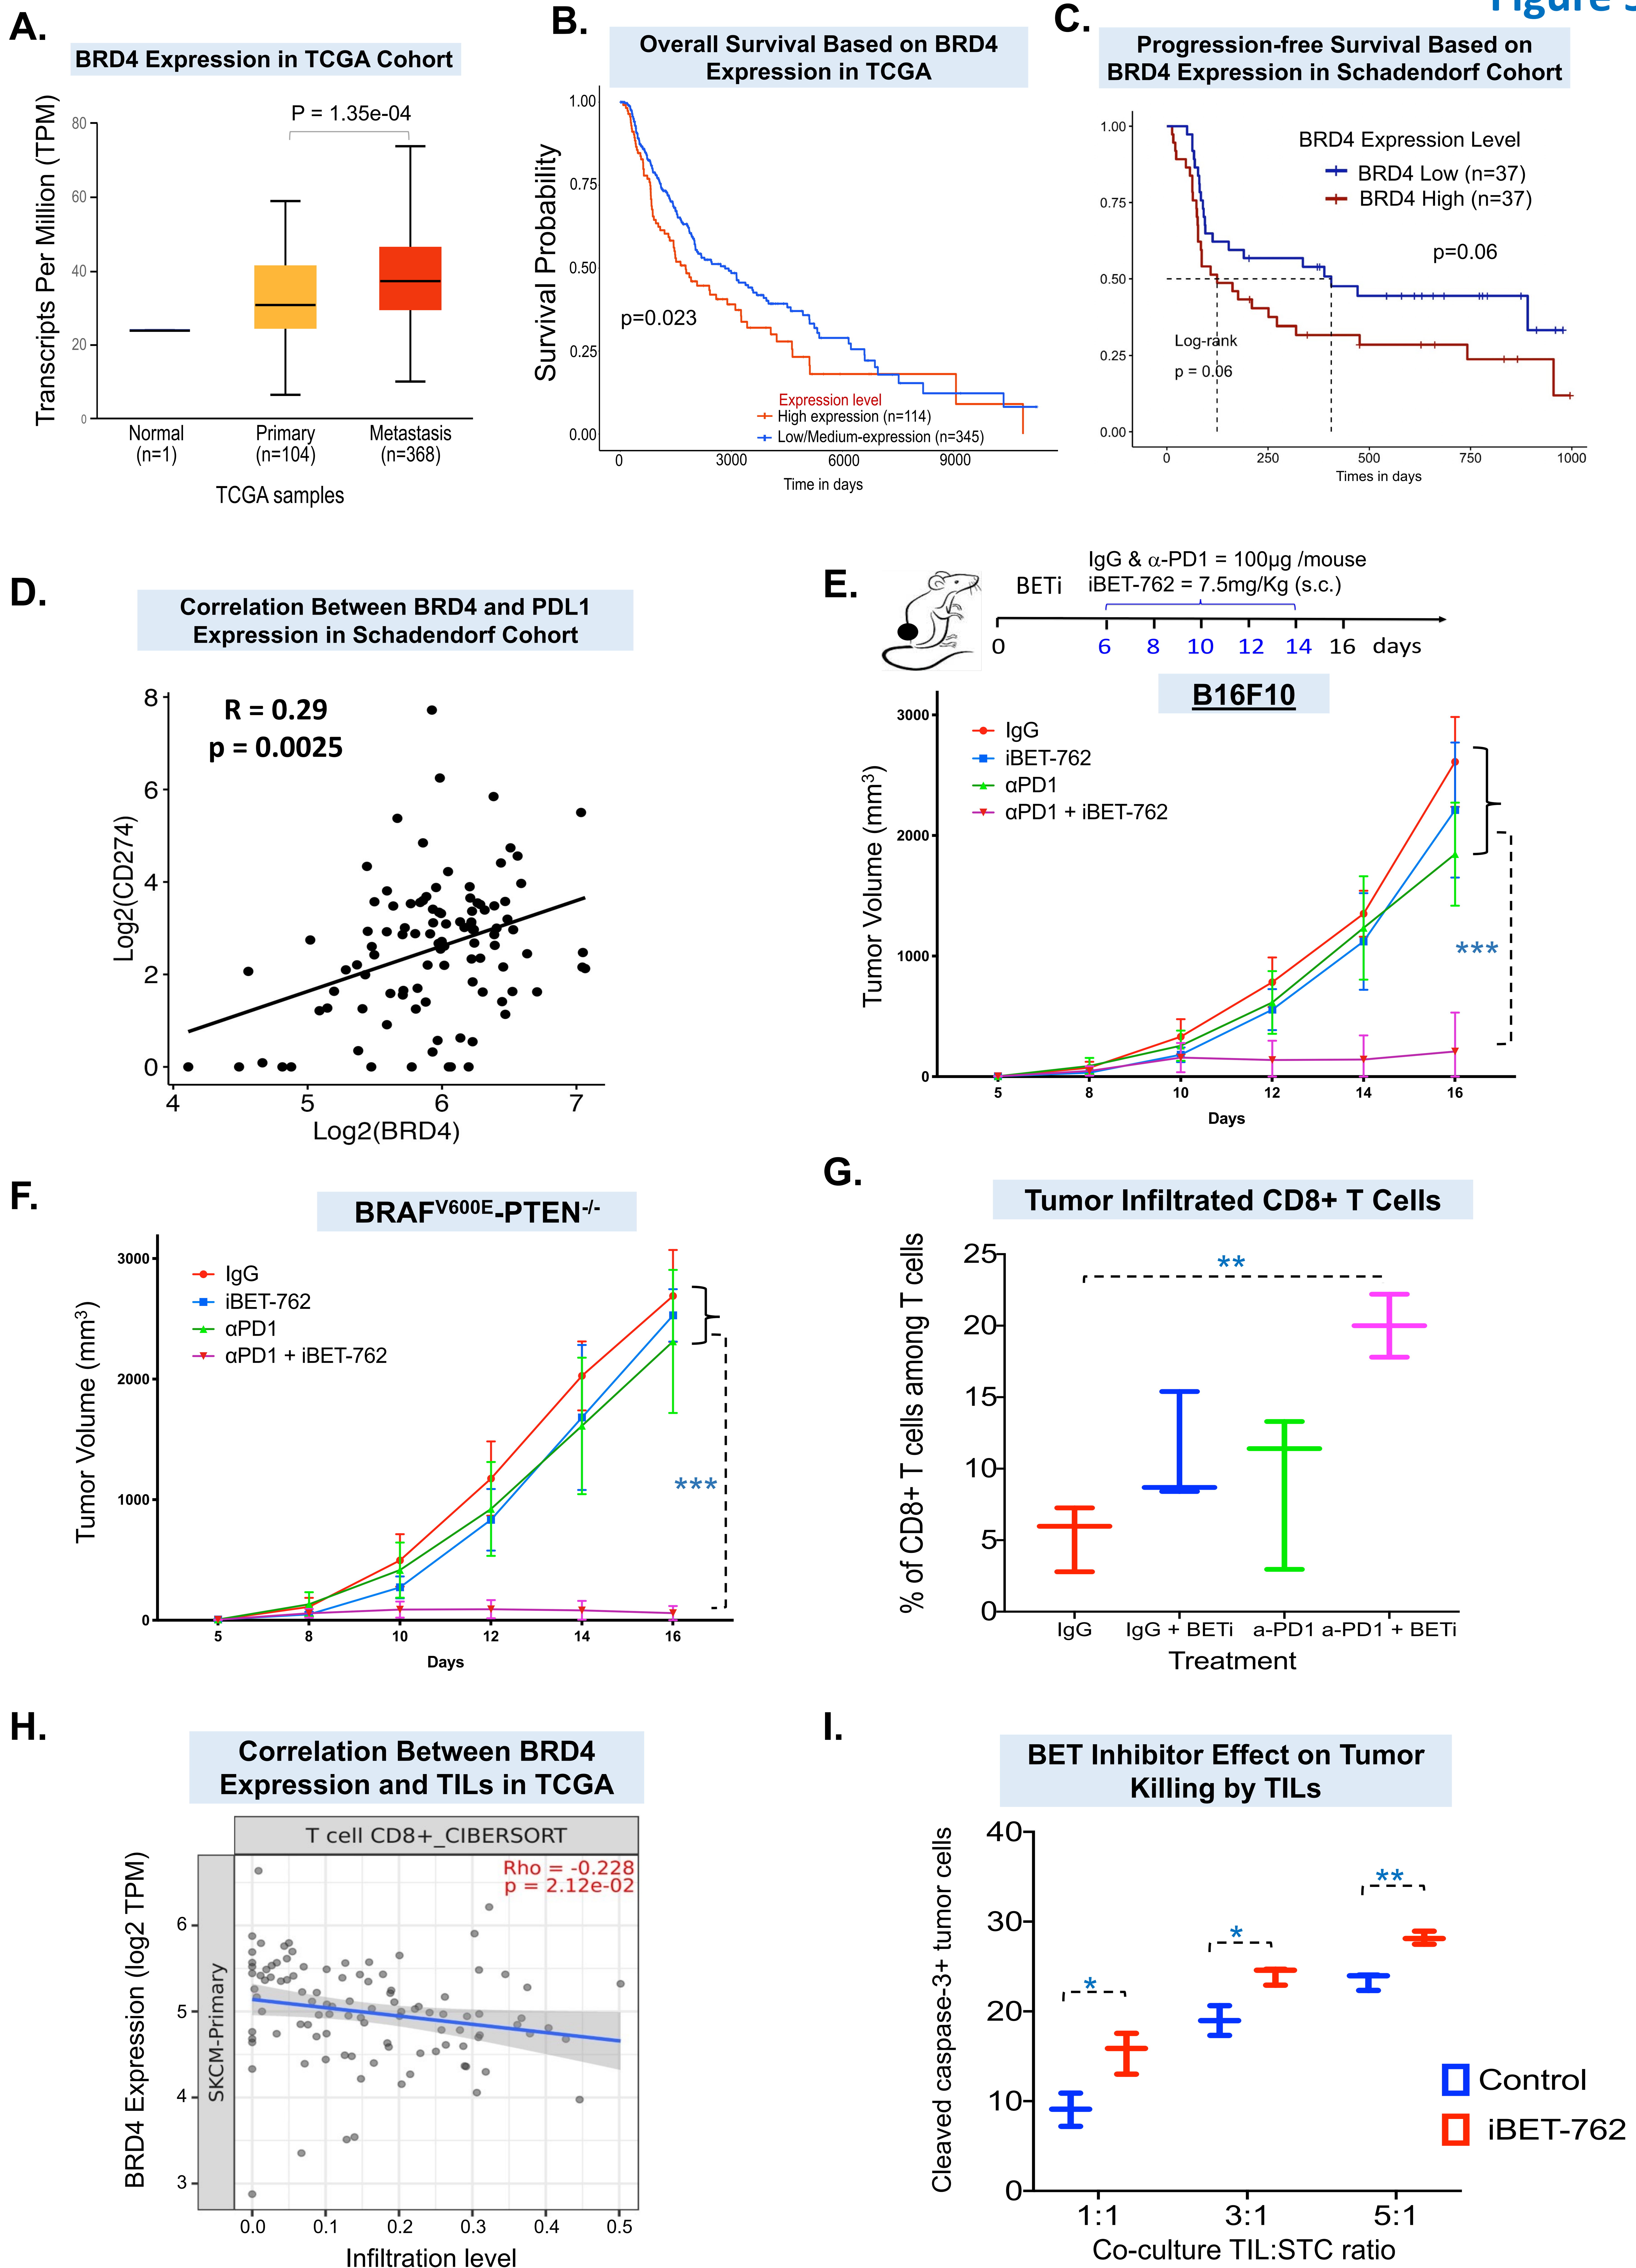

A.

Pathways Altered Upon  $\alpha$ -PD1+ BETi Treatment

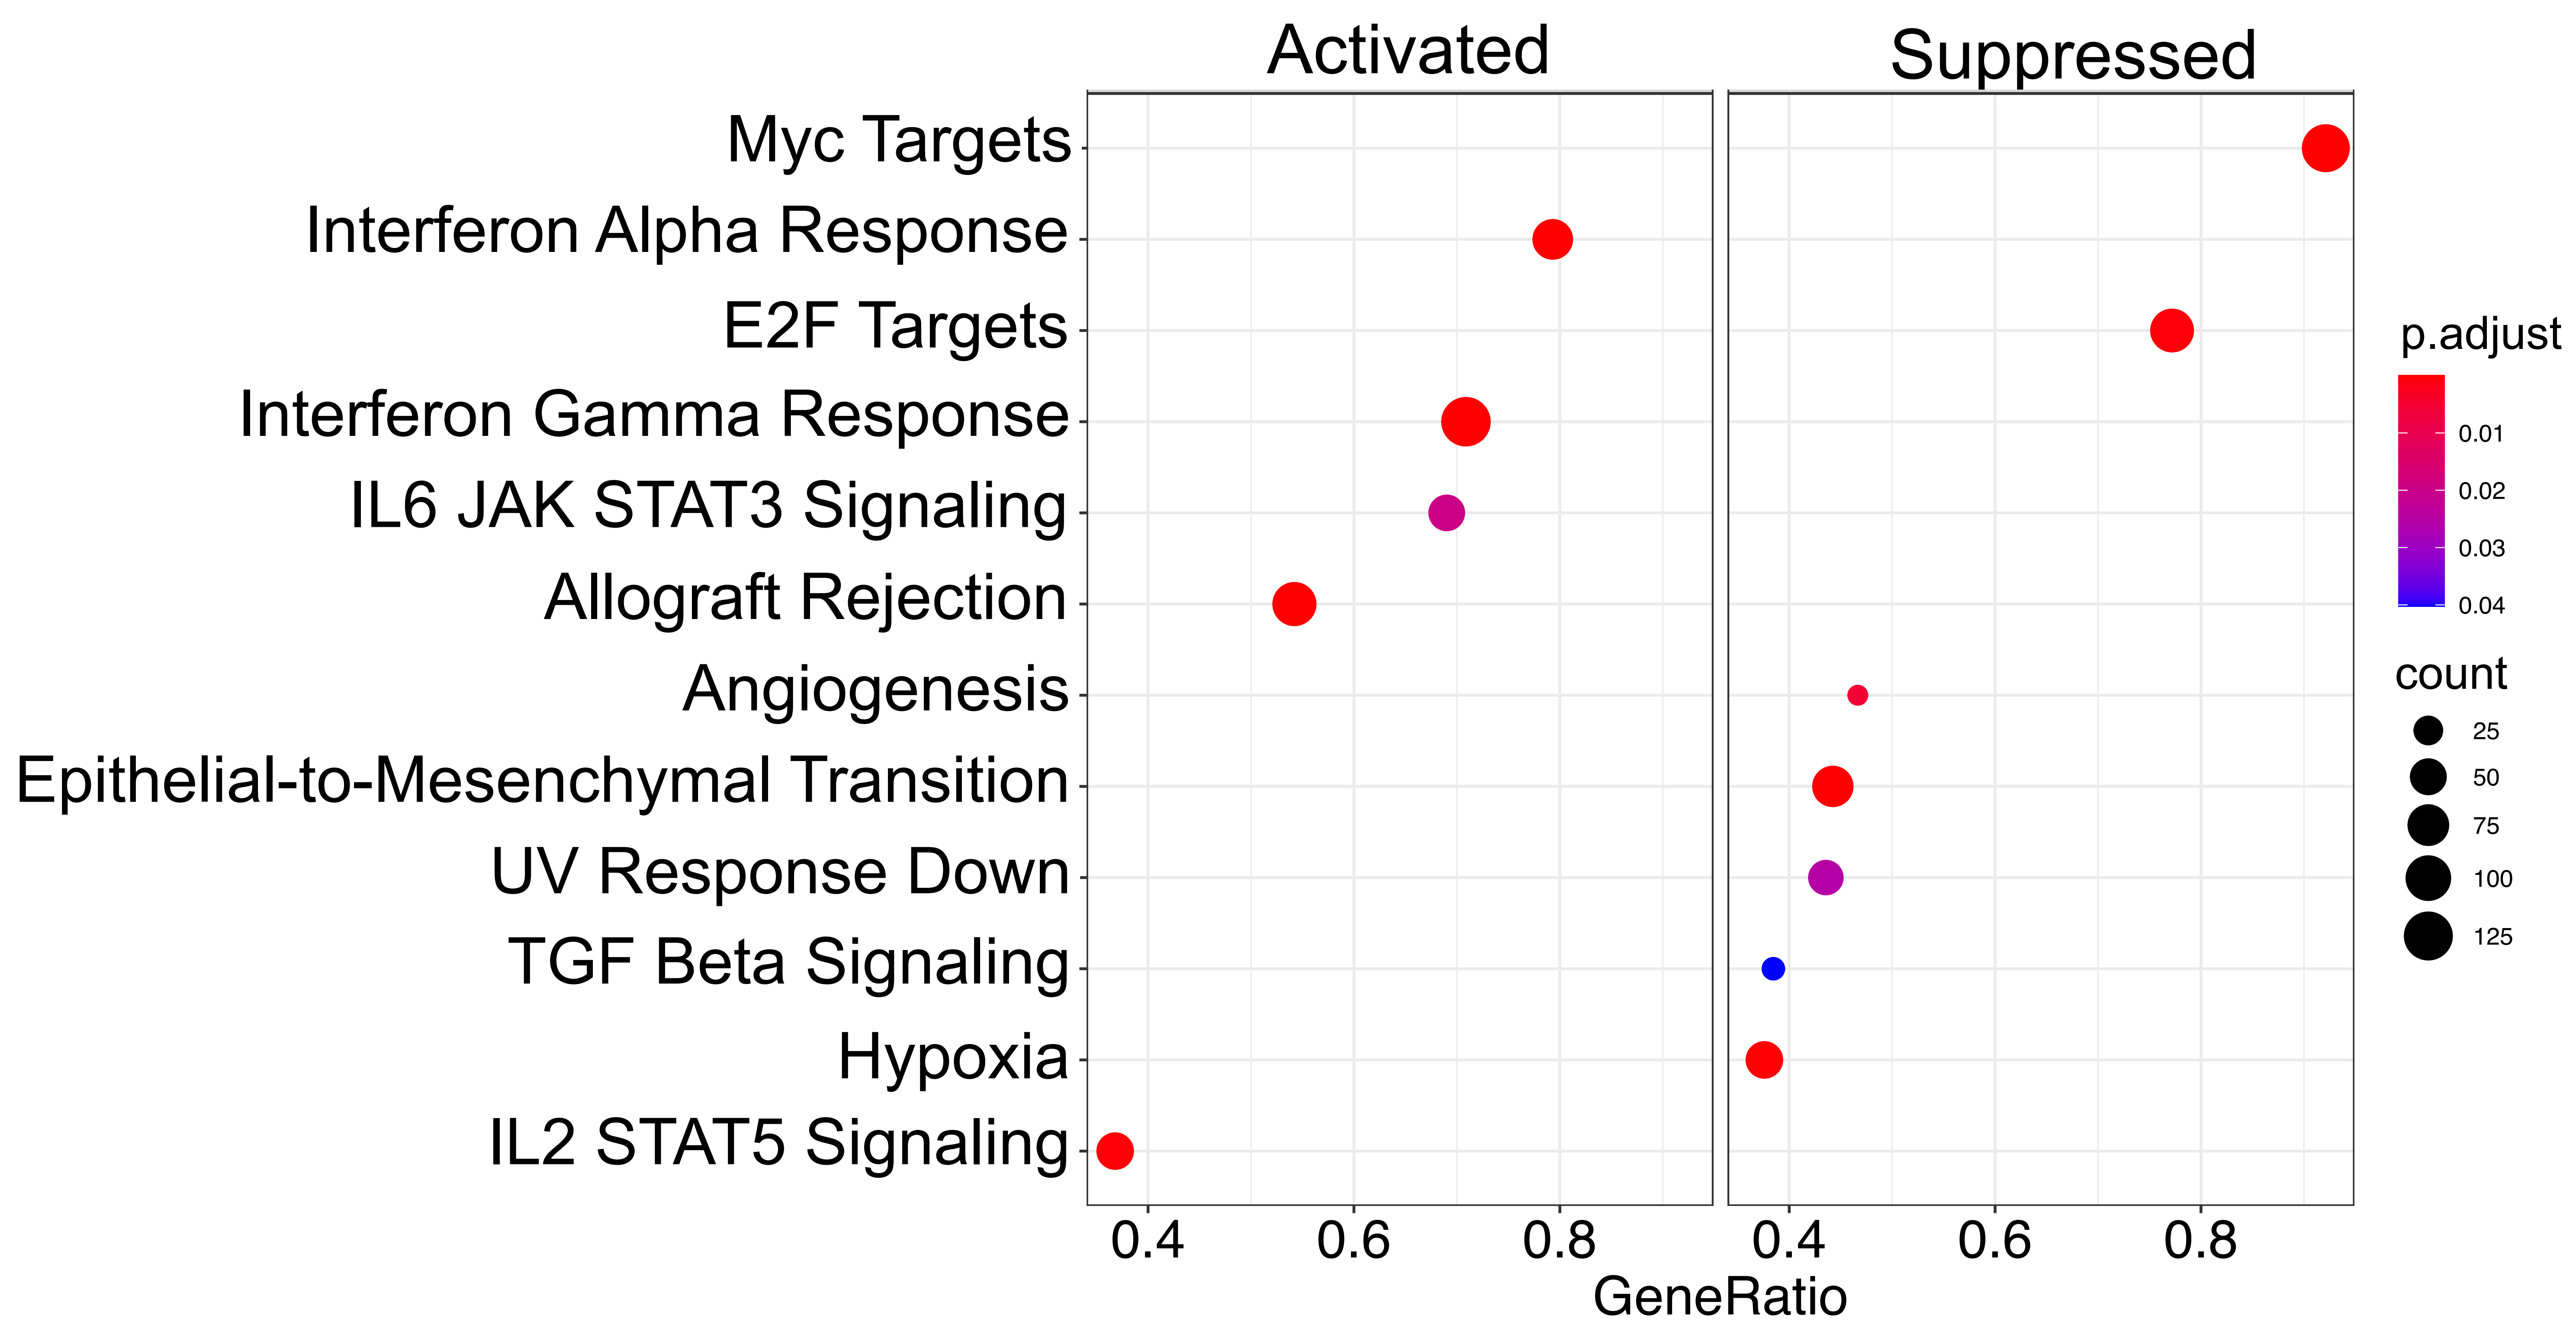

B.

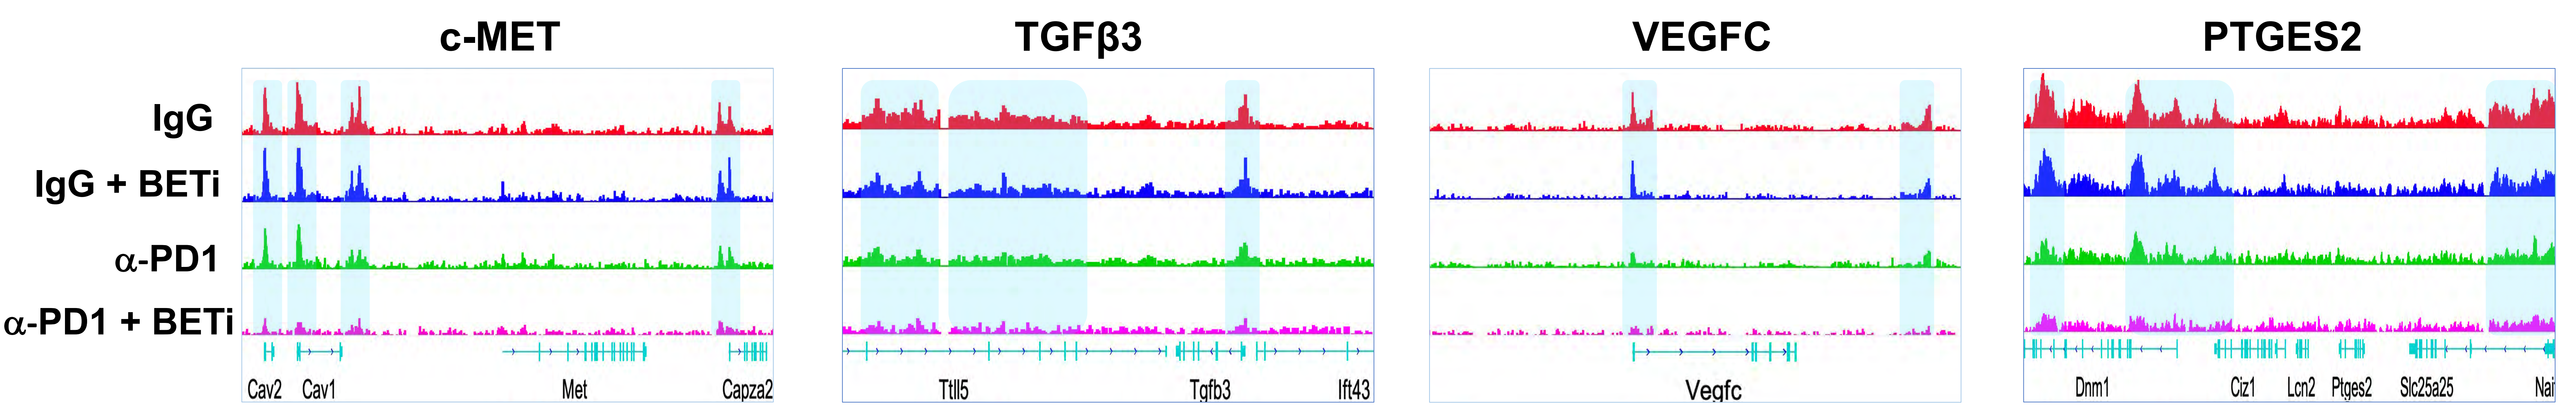

C.

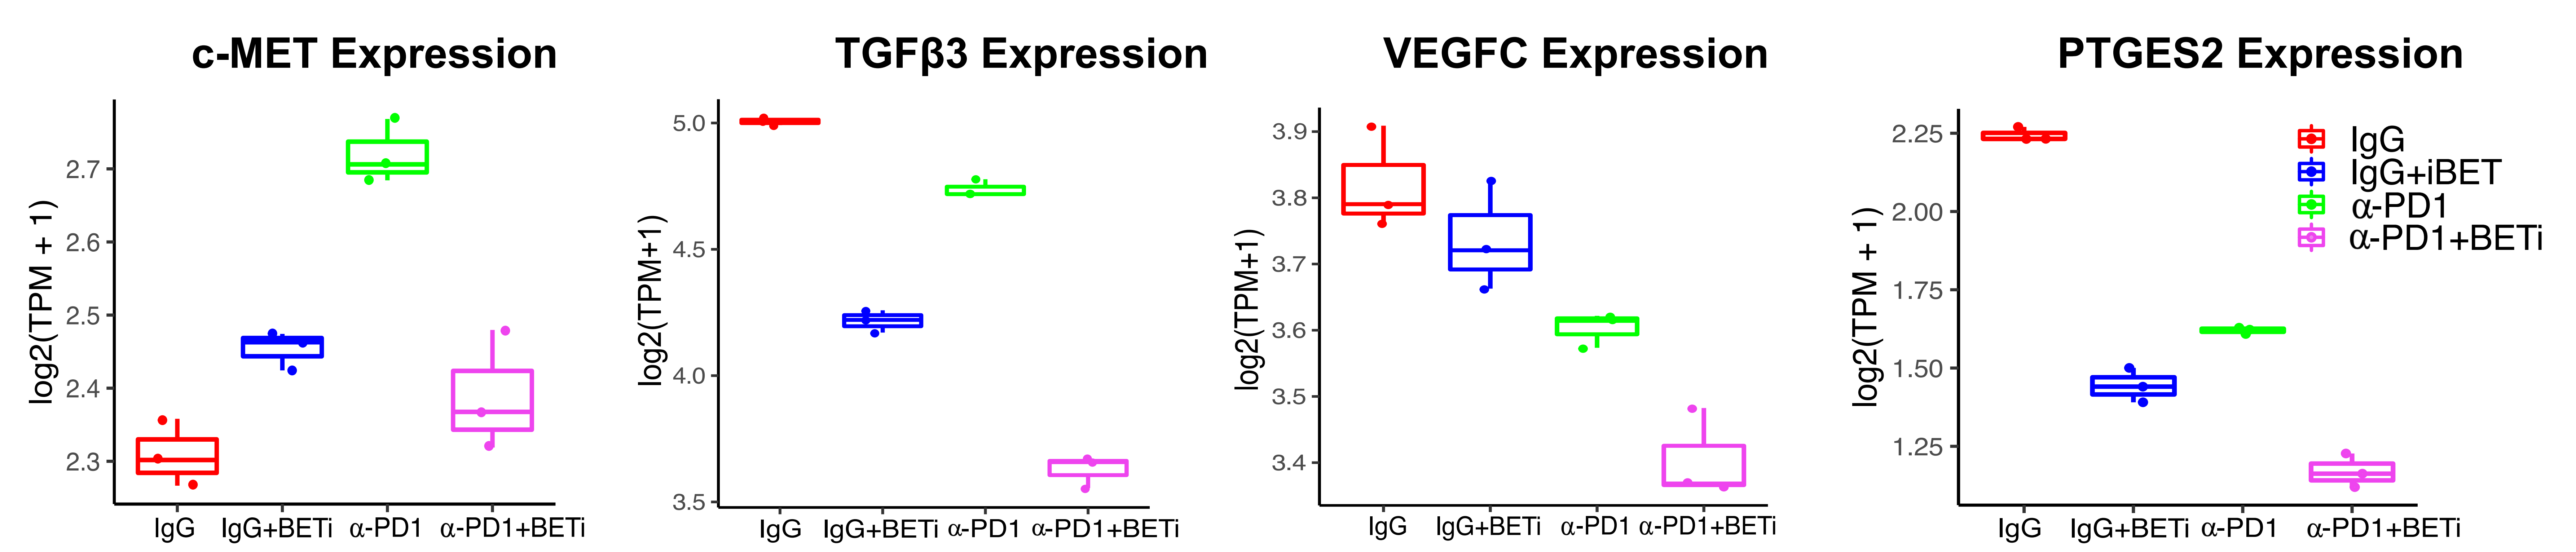

D.

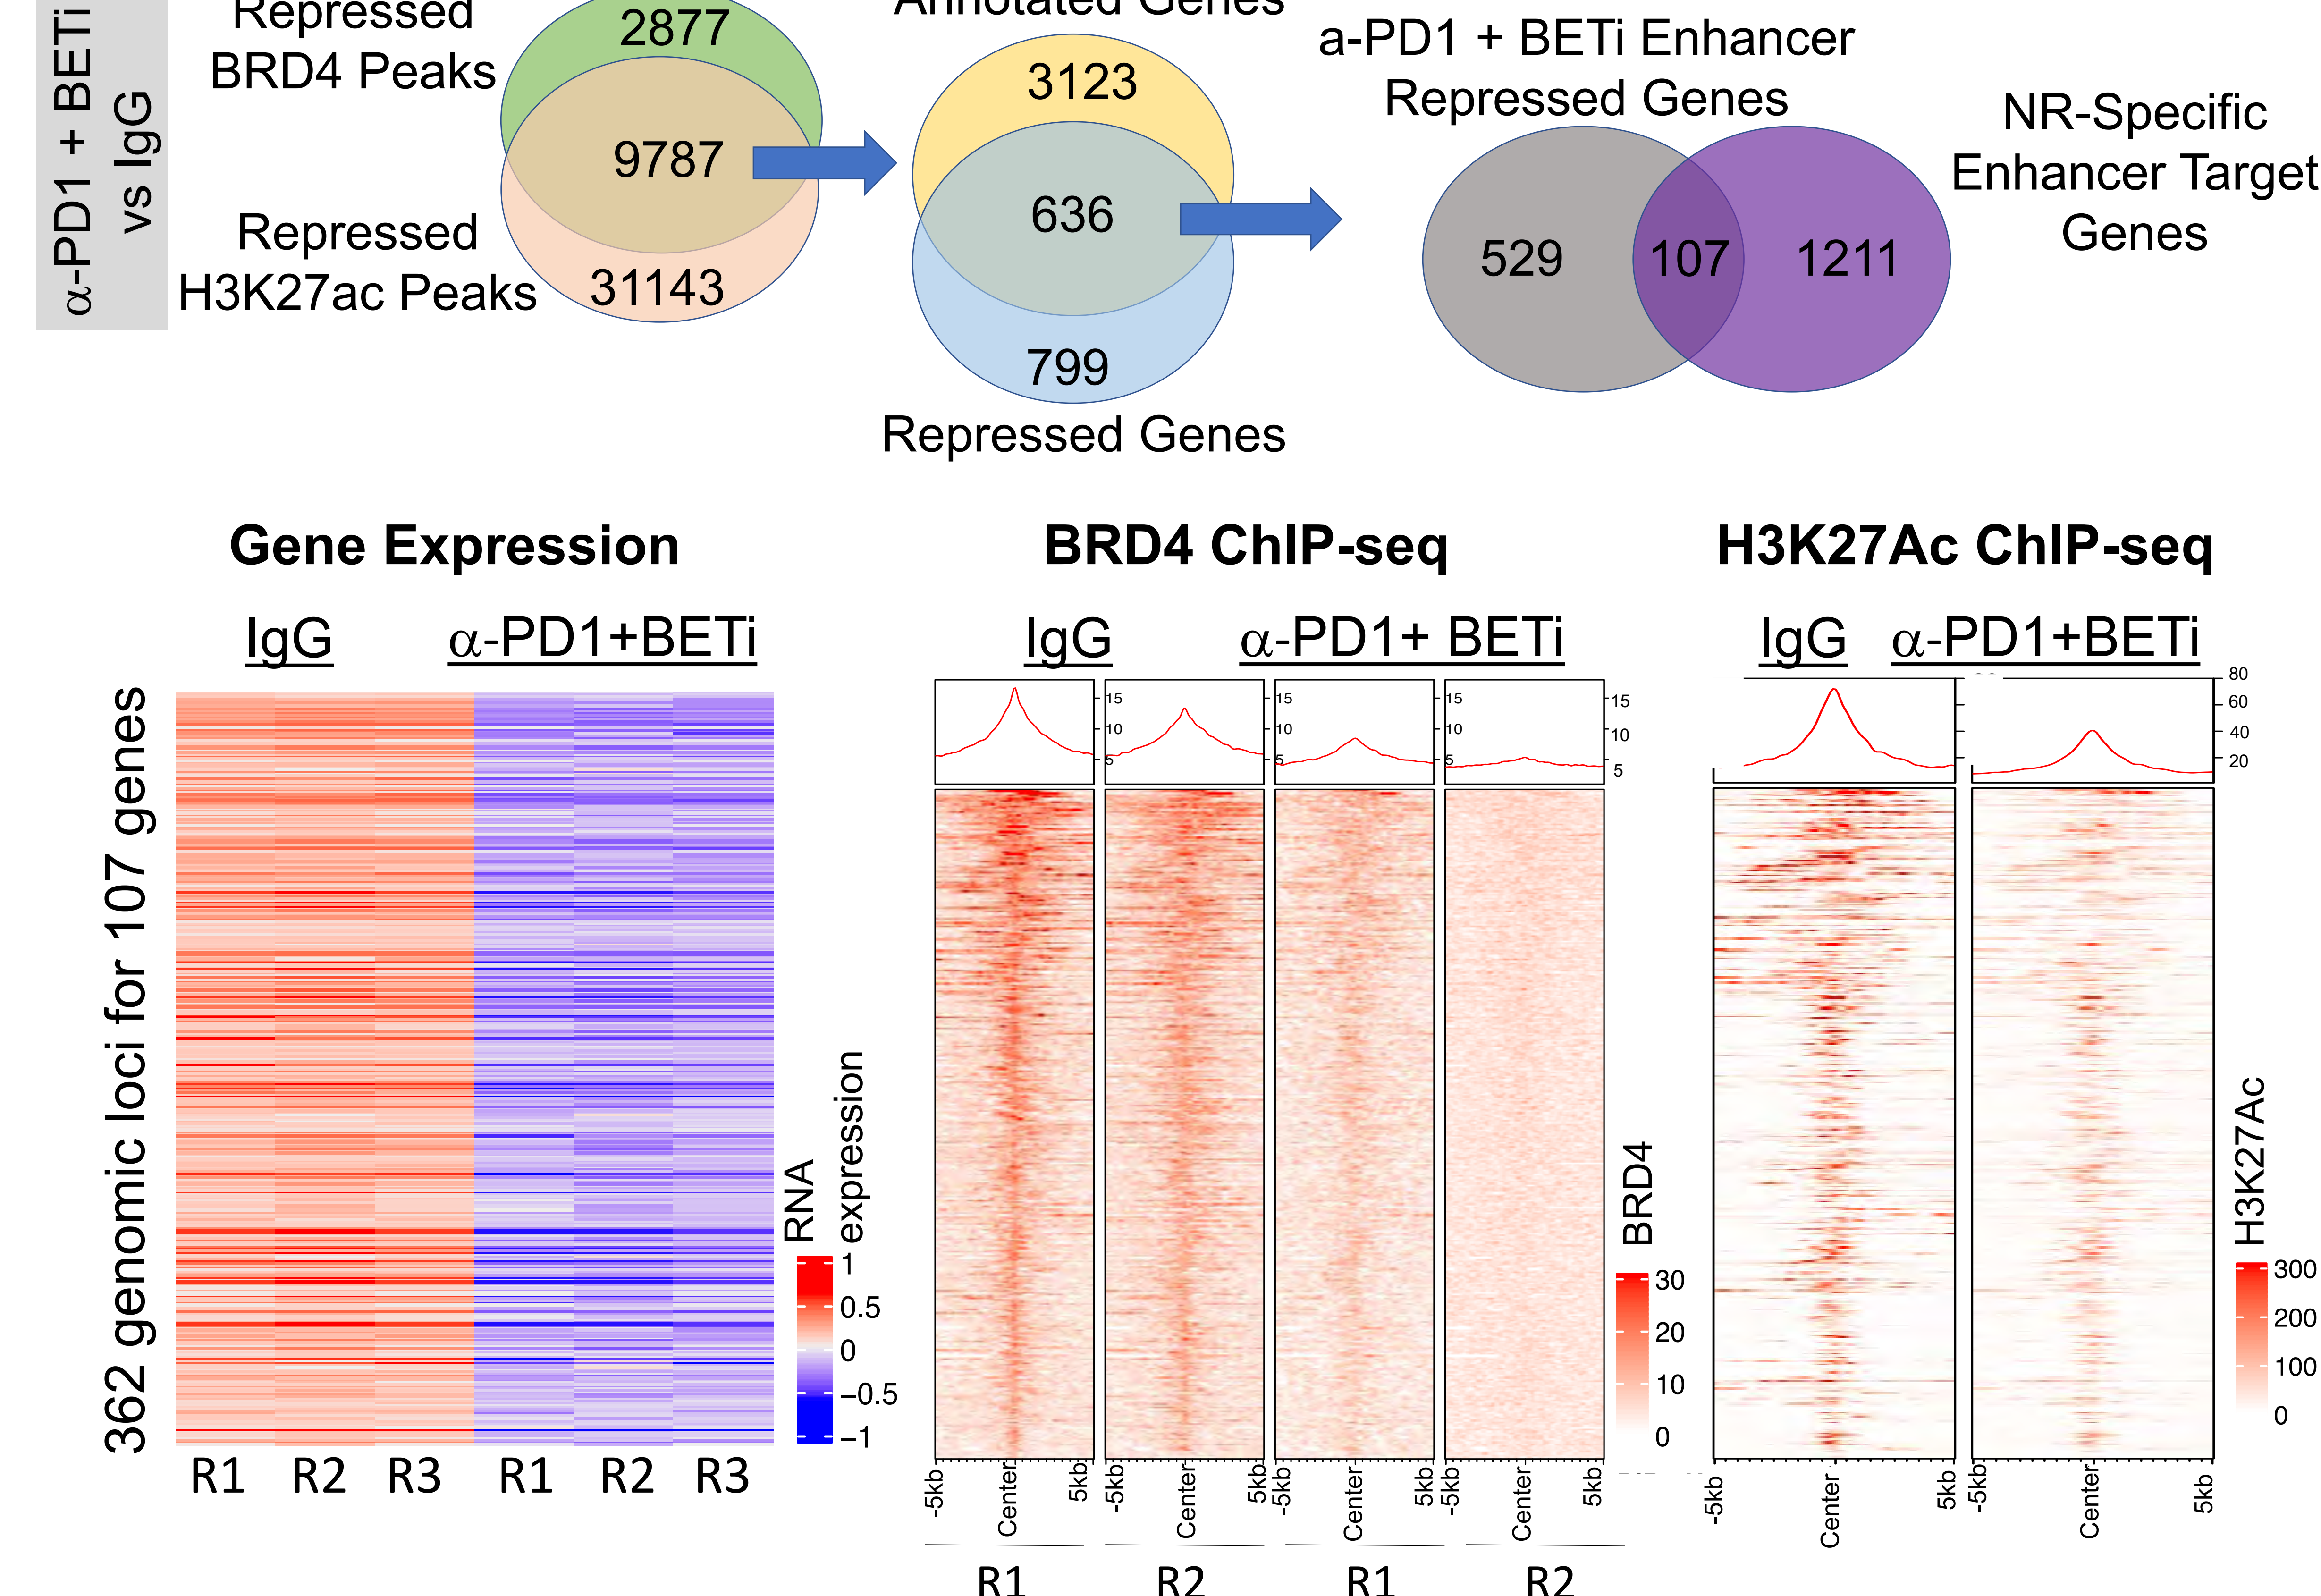

E.

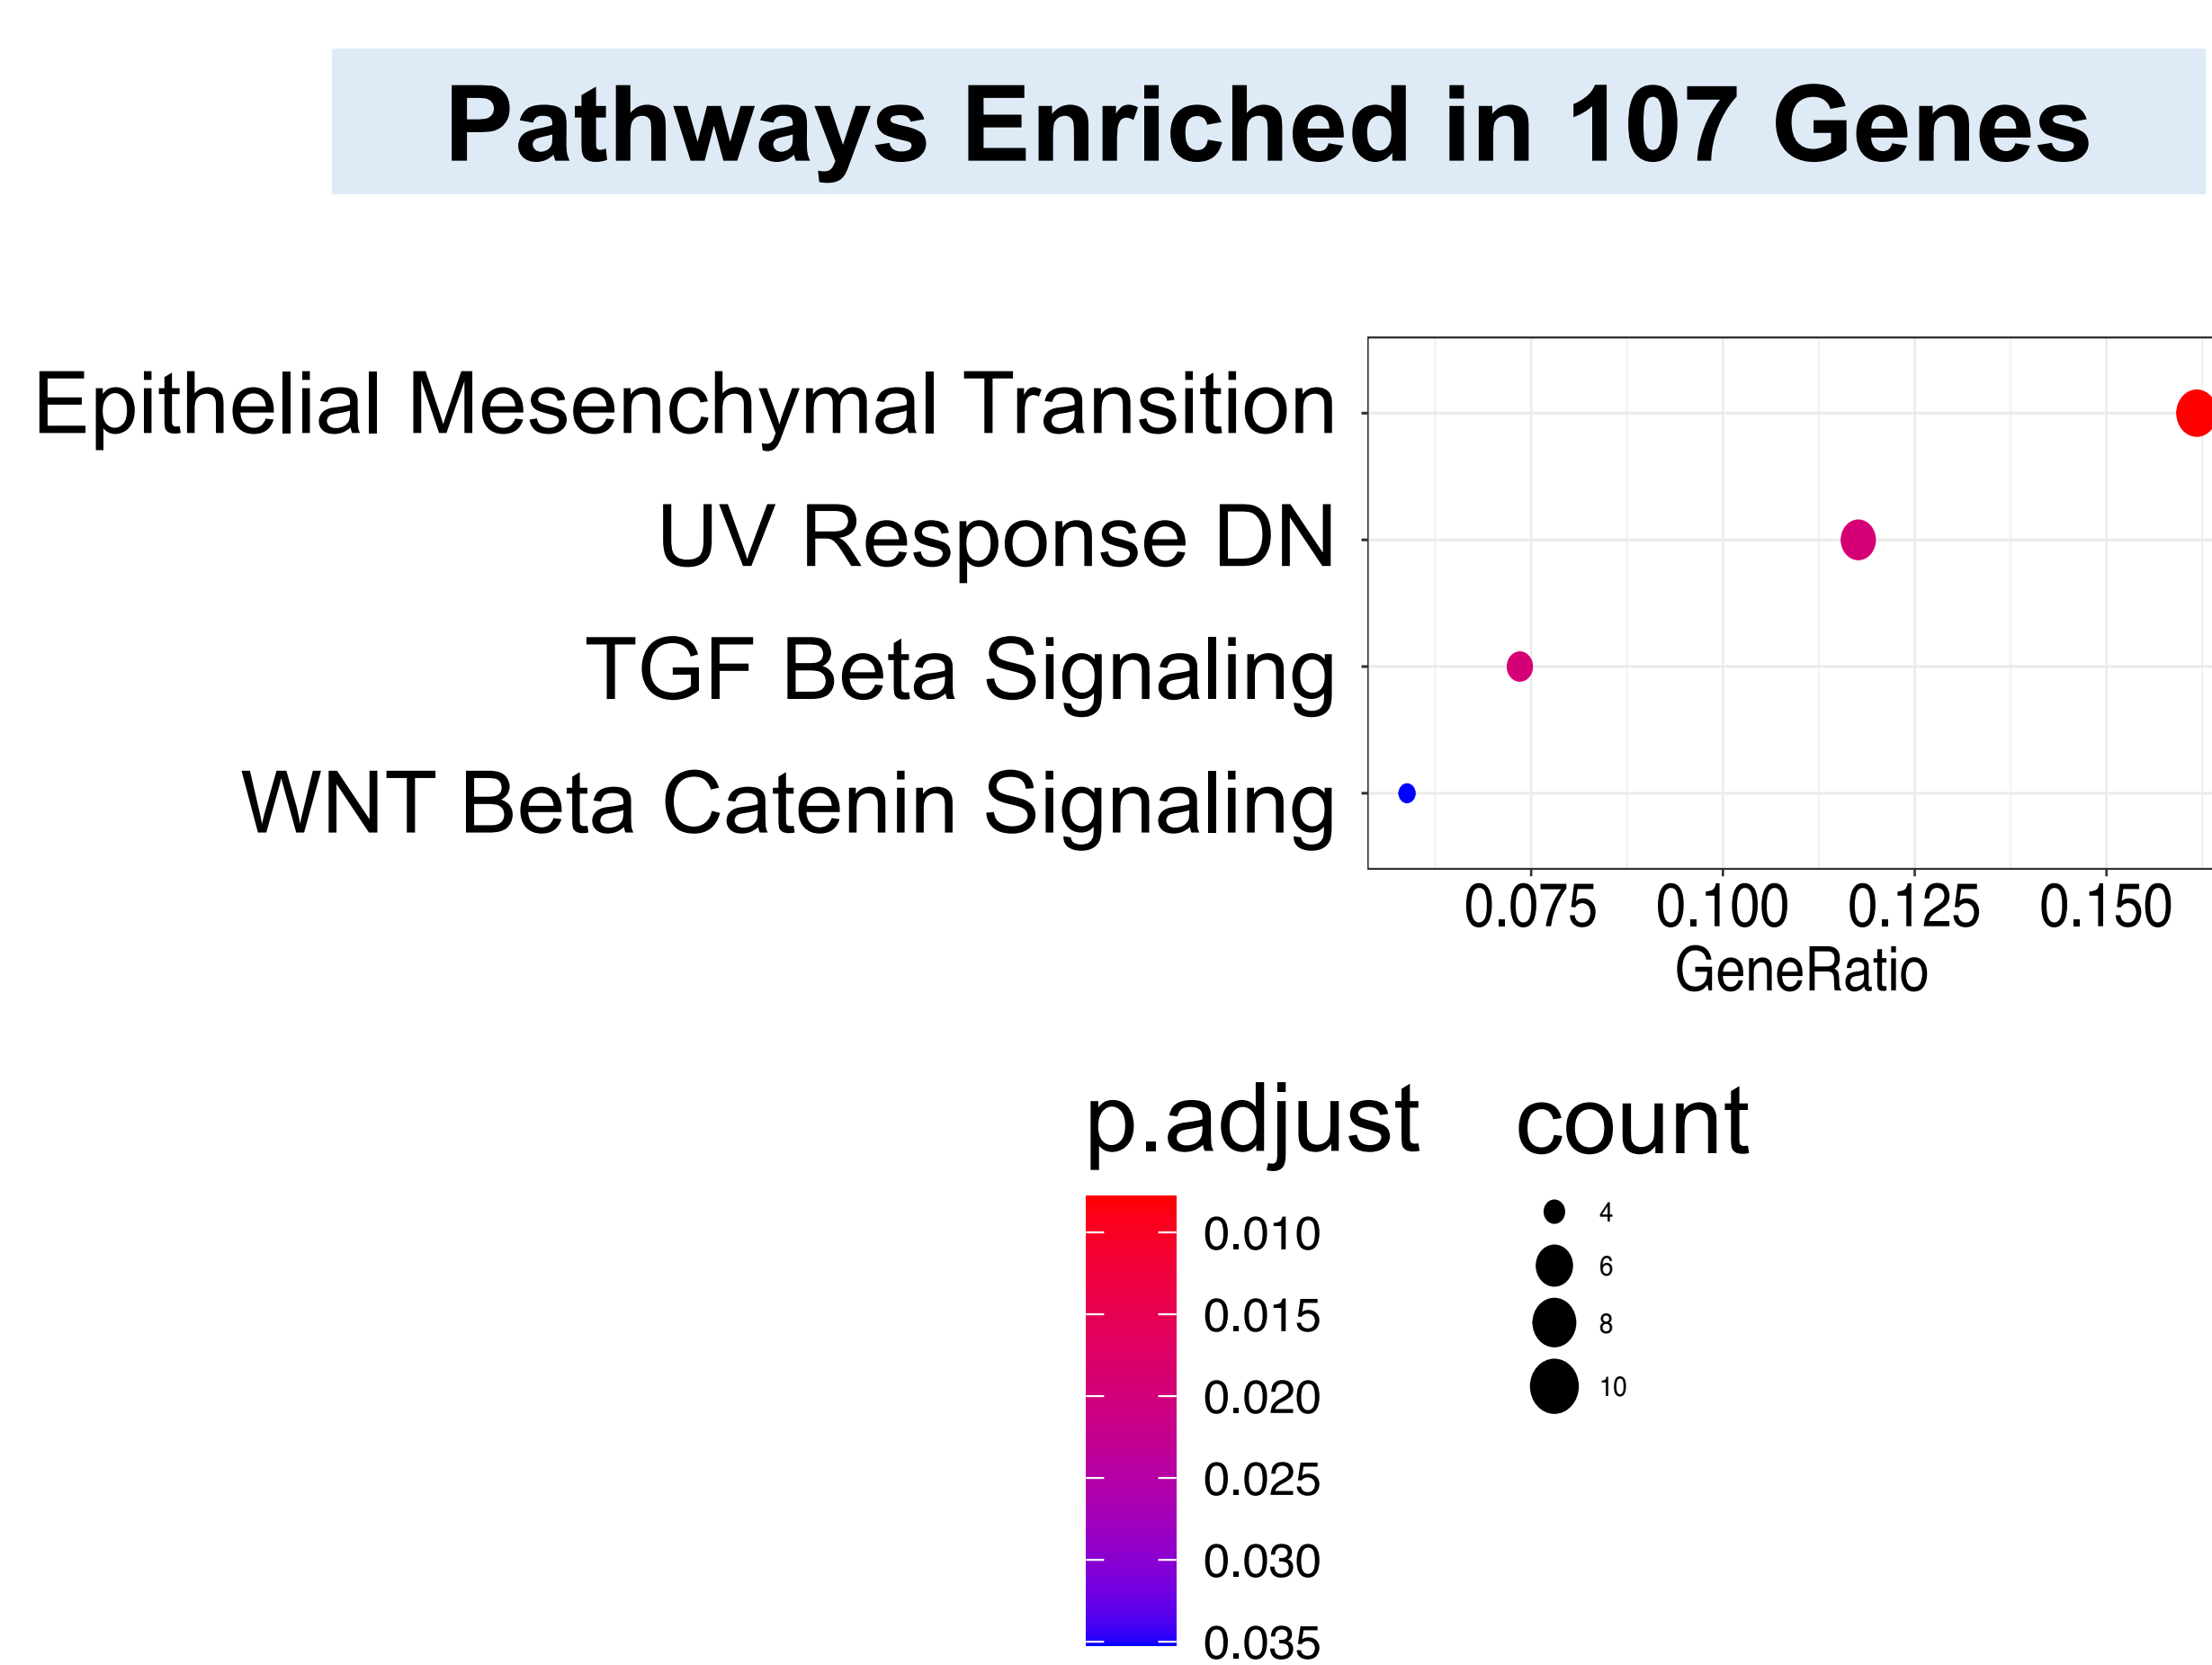

**A. Progression Free Survival (NR vs R)**

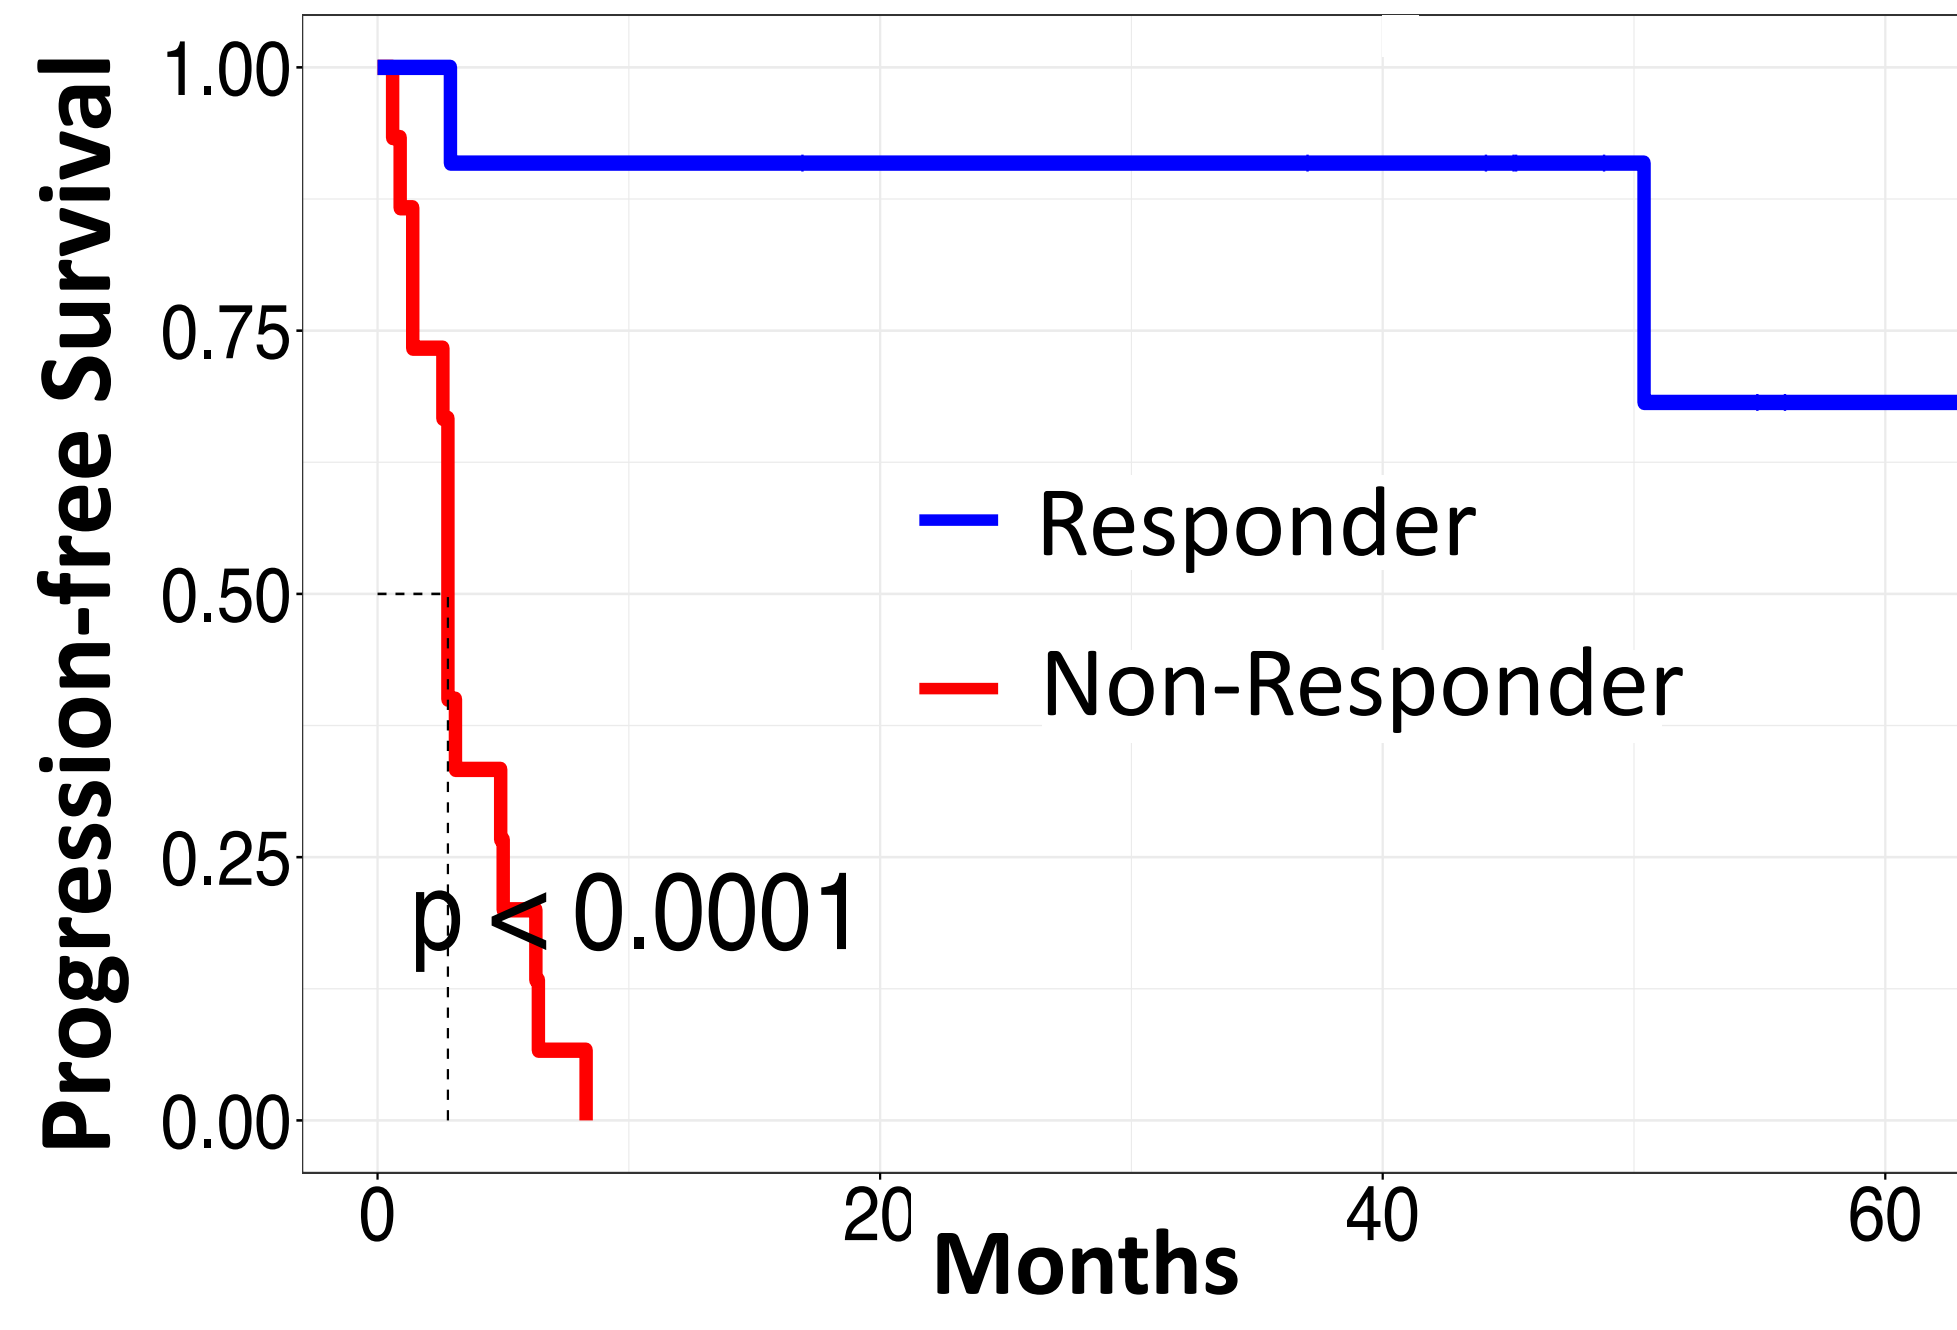

**B. Overall Survival (NR vs R)**

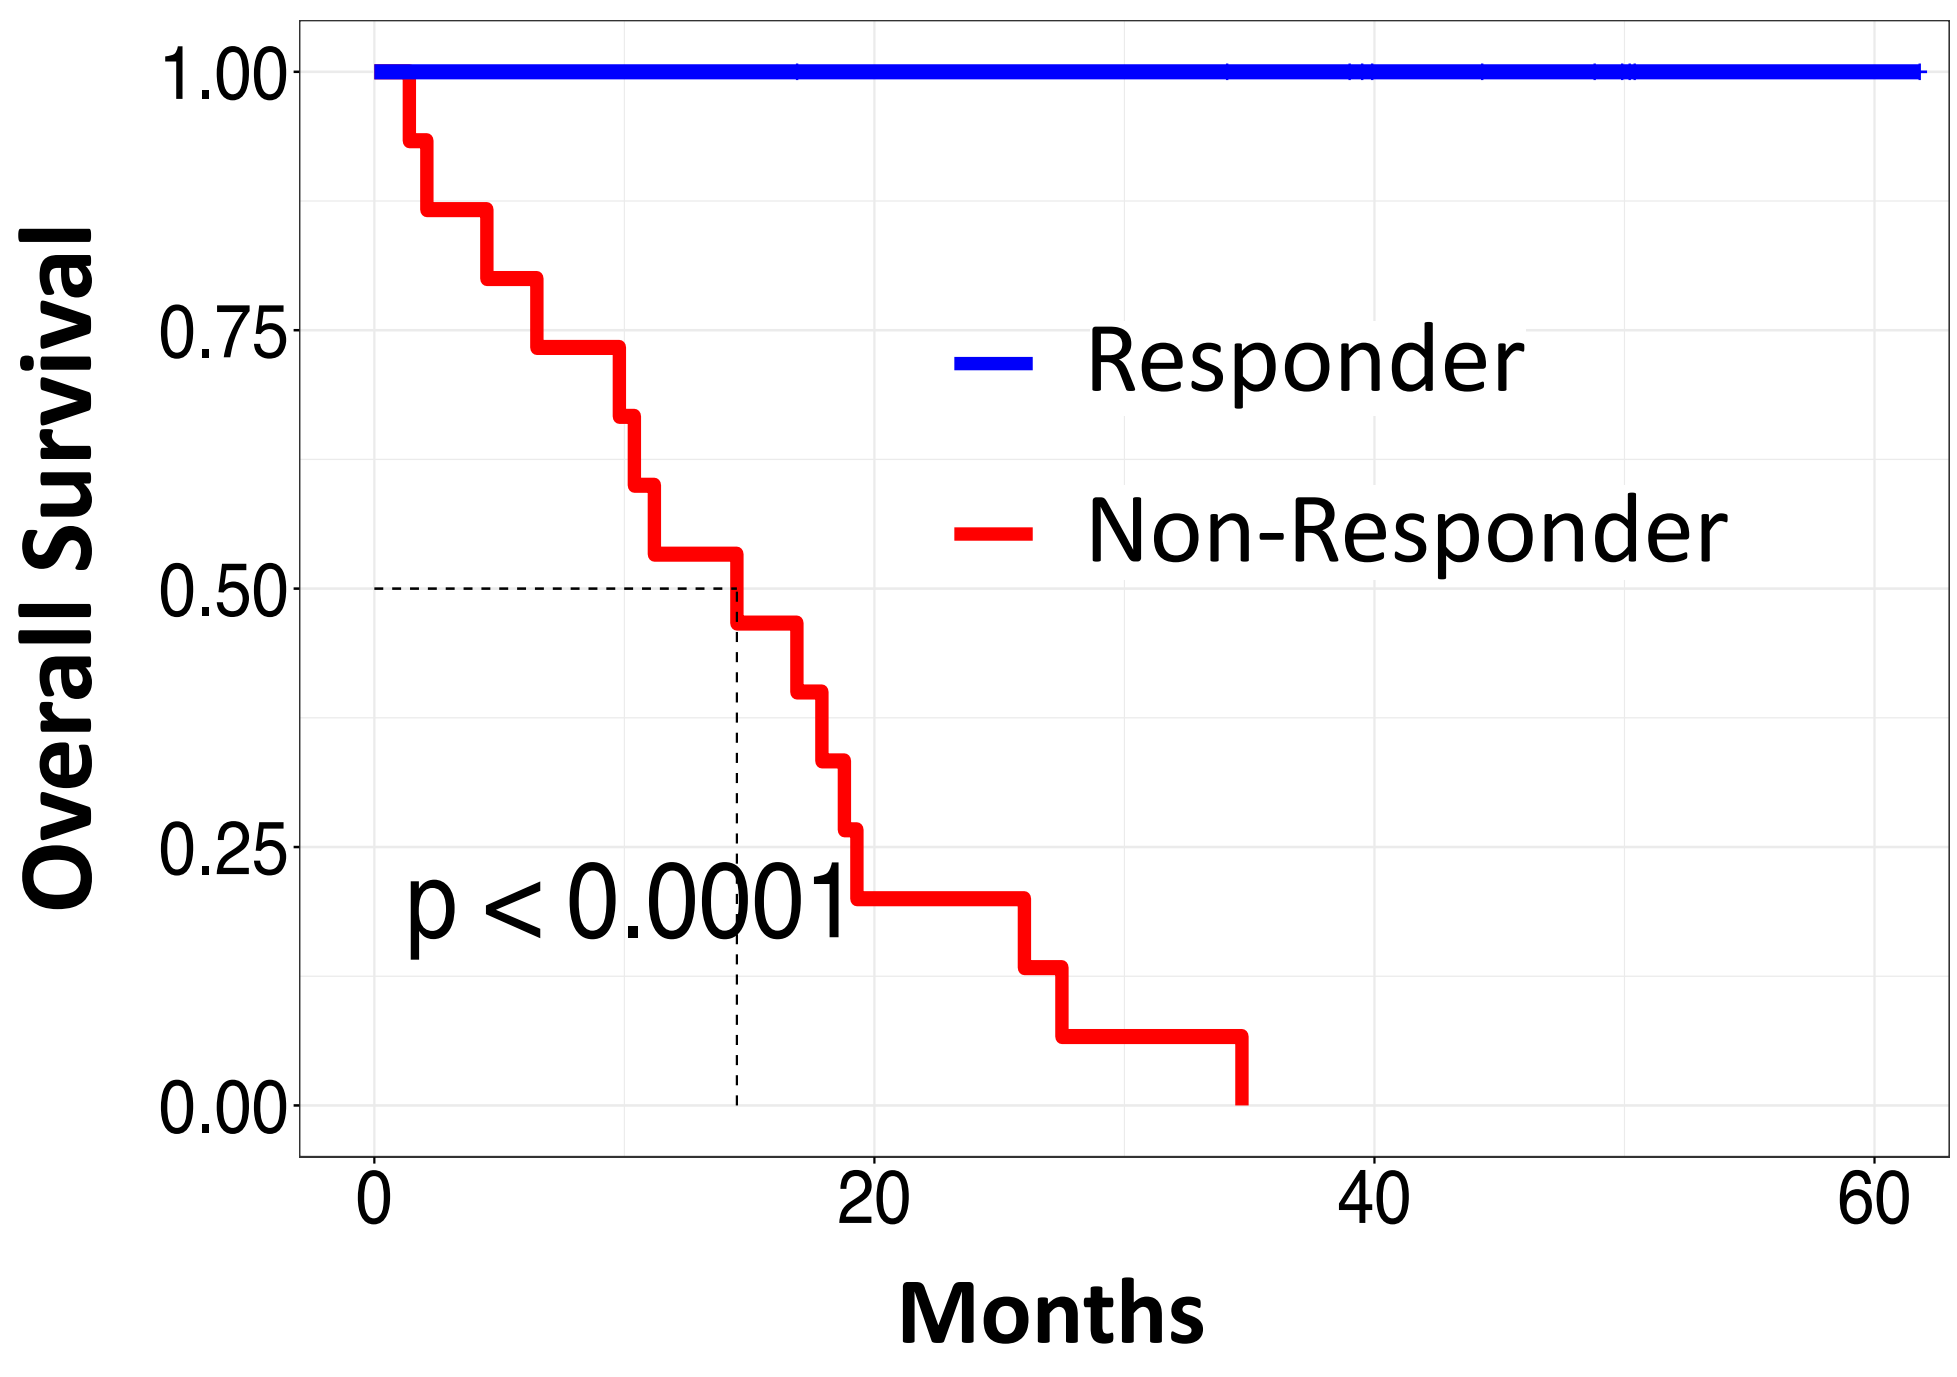

**C. MDACC CHIP-seq Peaks**

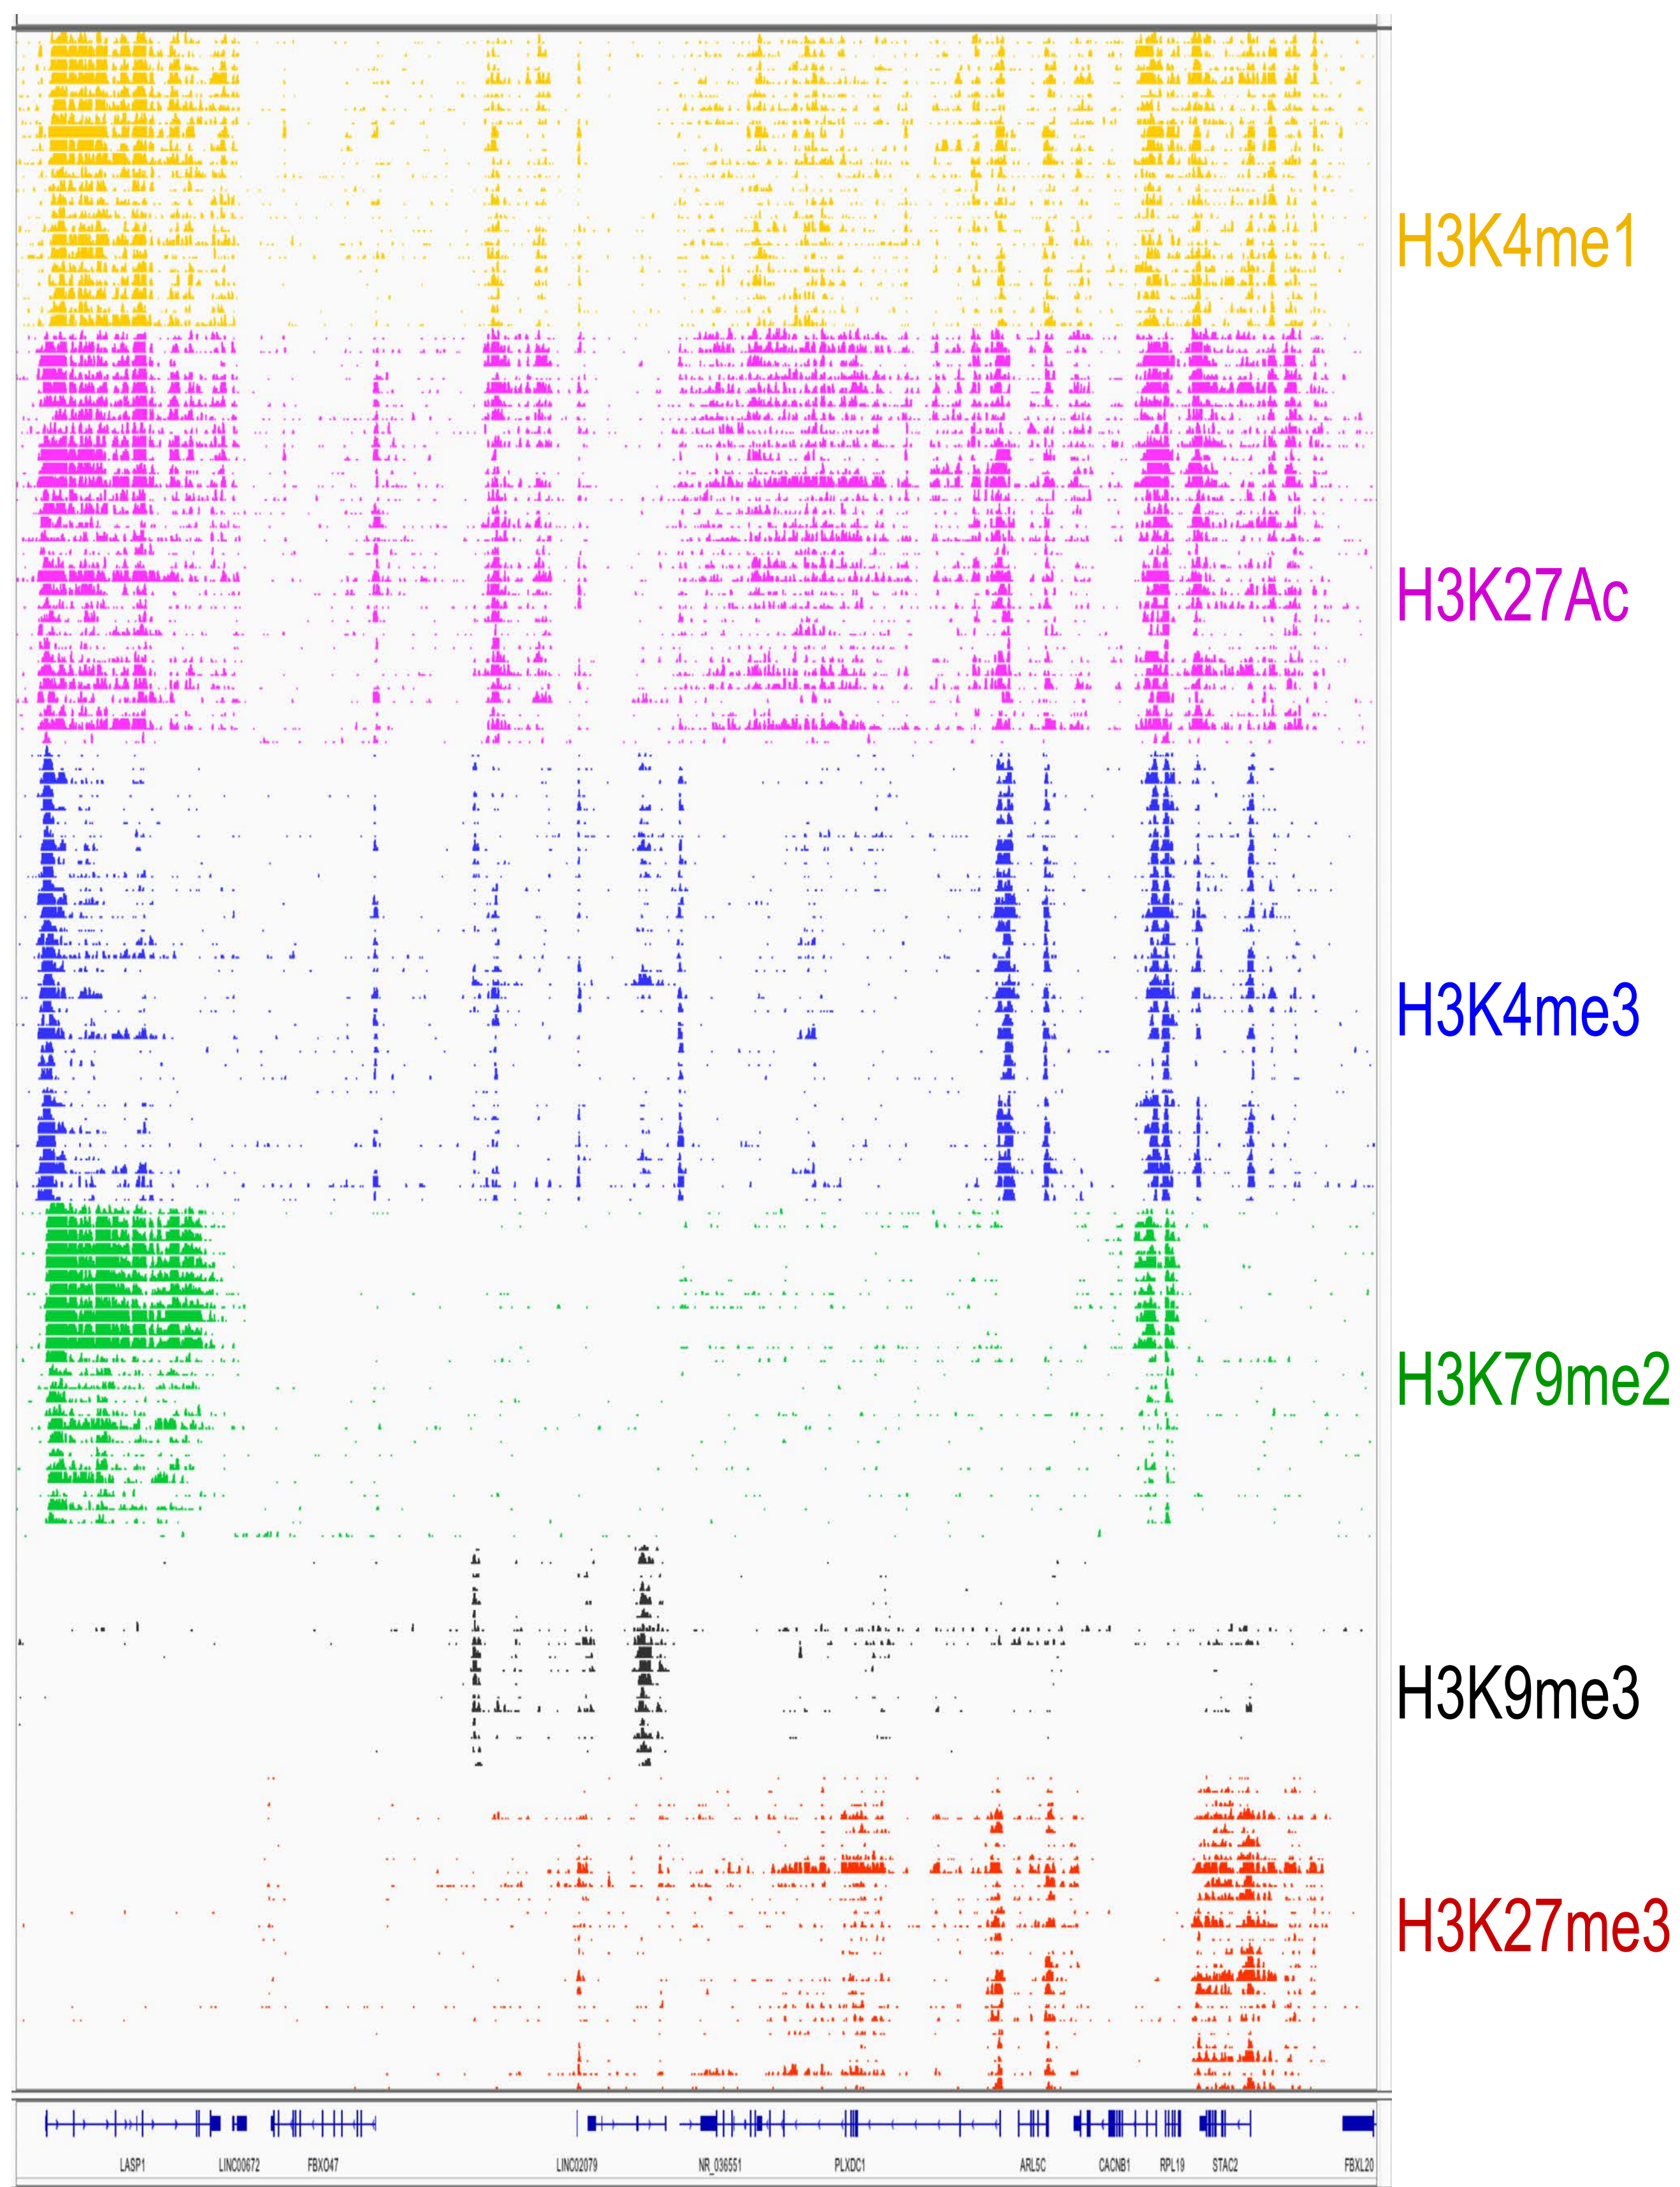

**G. E7 Regions Enriched in R Pre-treatment**

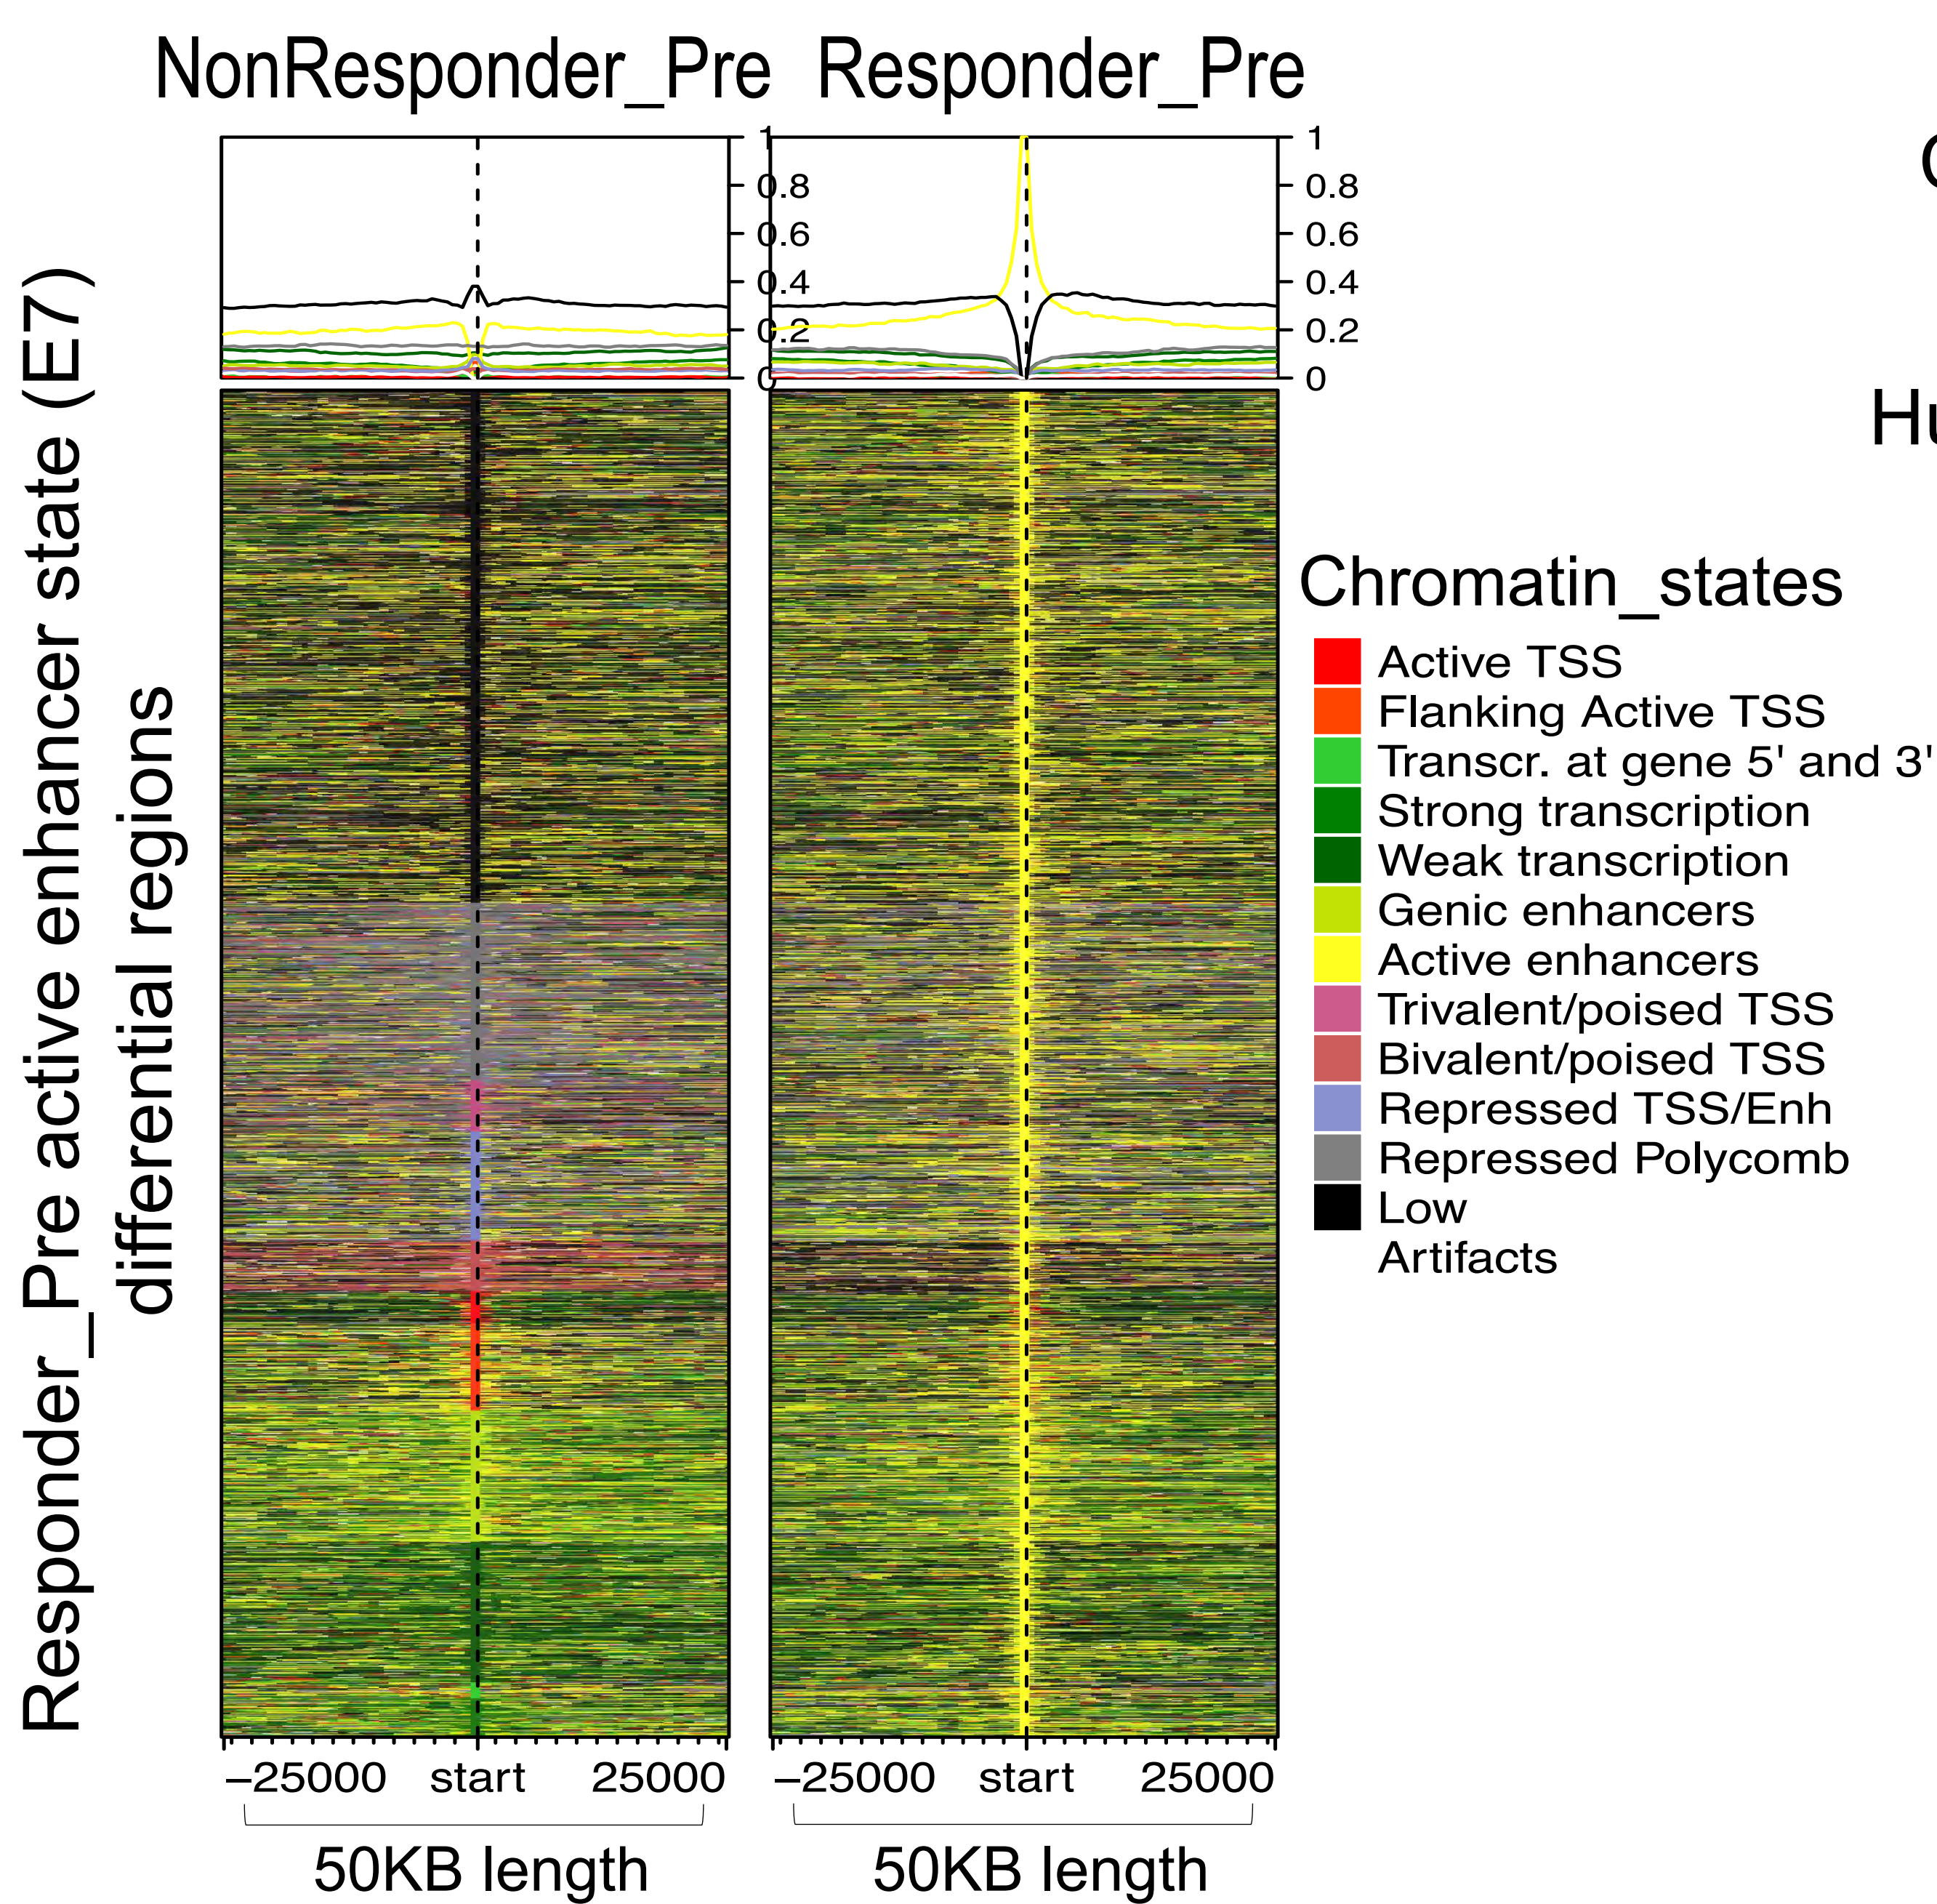

**D. Genomic Annotations of Chromatin States**

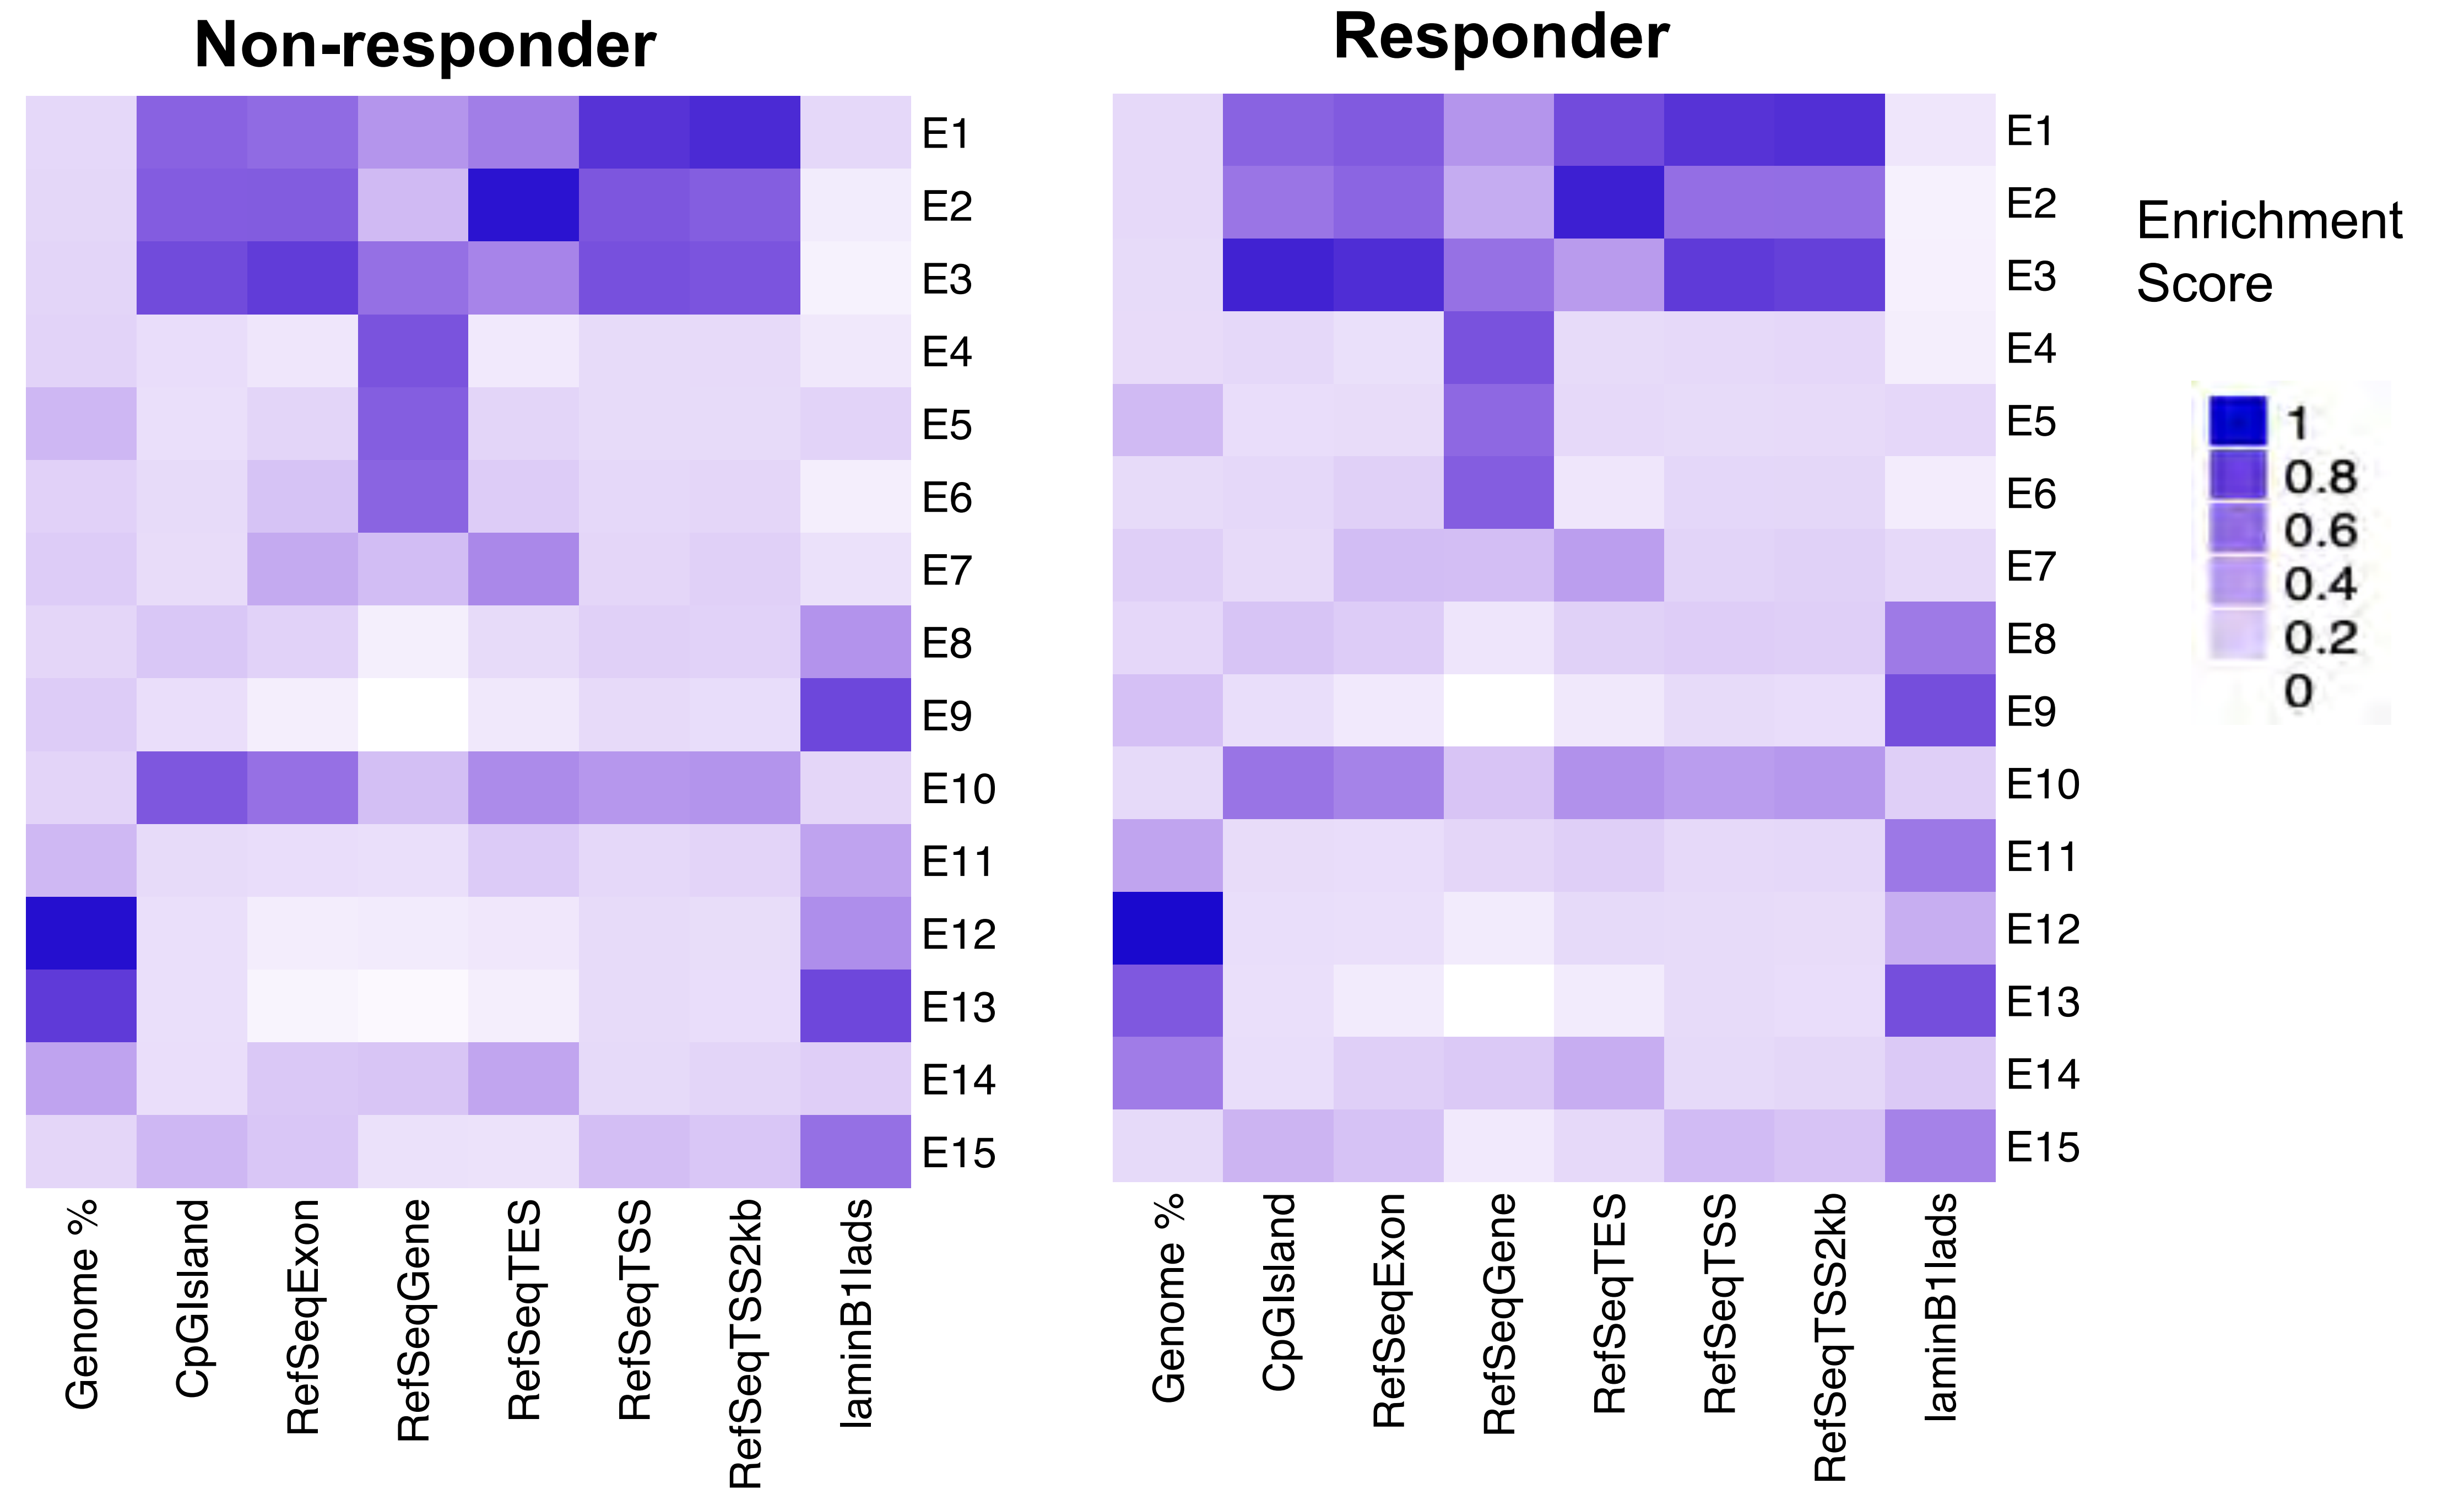

**E. Differential Expression for Gene Targets of Active Enhancer (E7) State**

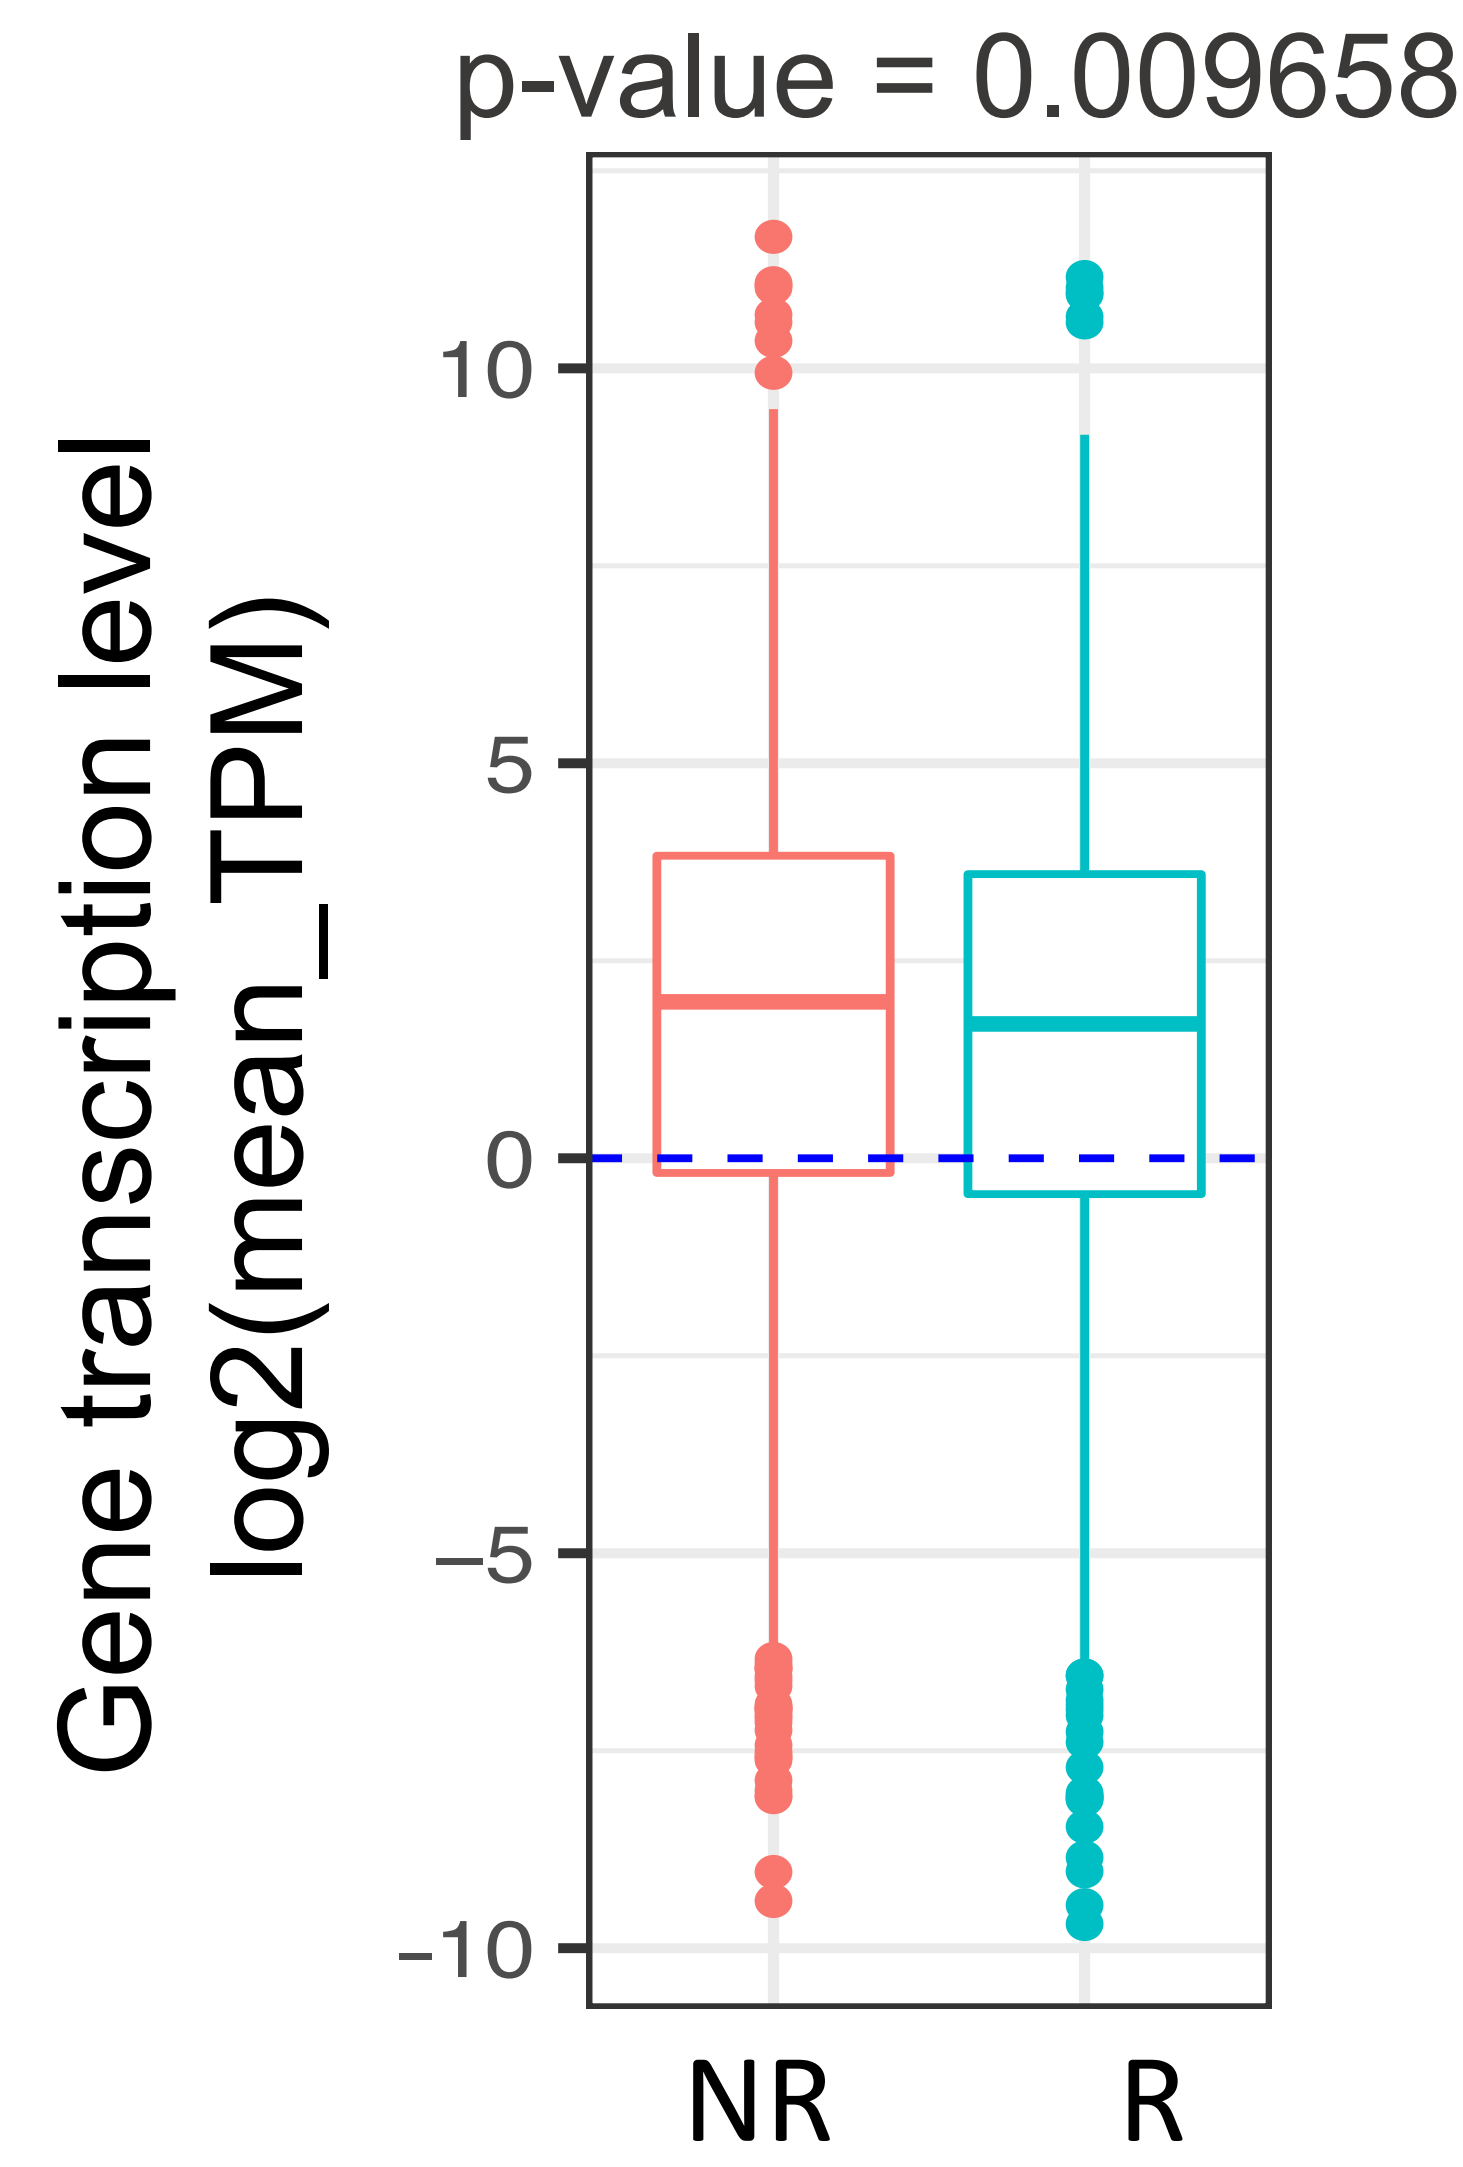

**F. Average H3K27ac and H3K27me3 Intensity Profiles for Differential Enhancers Between NR vs R**

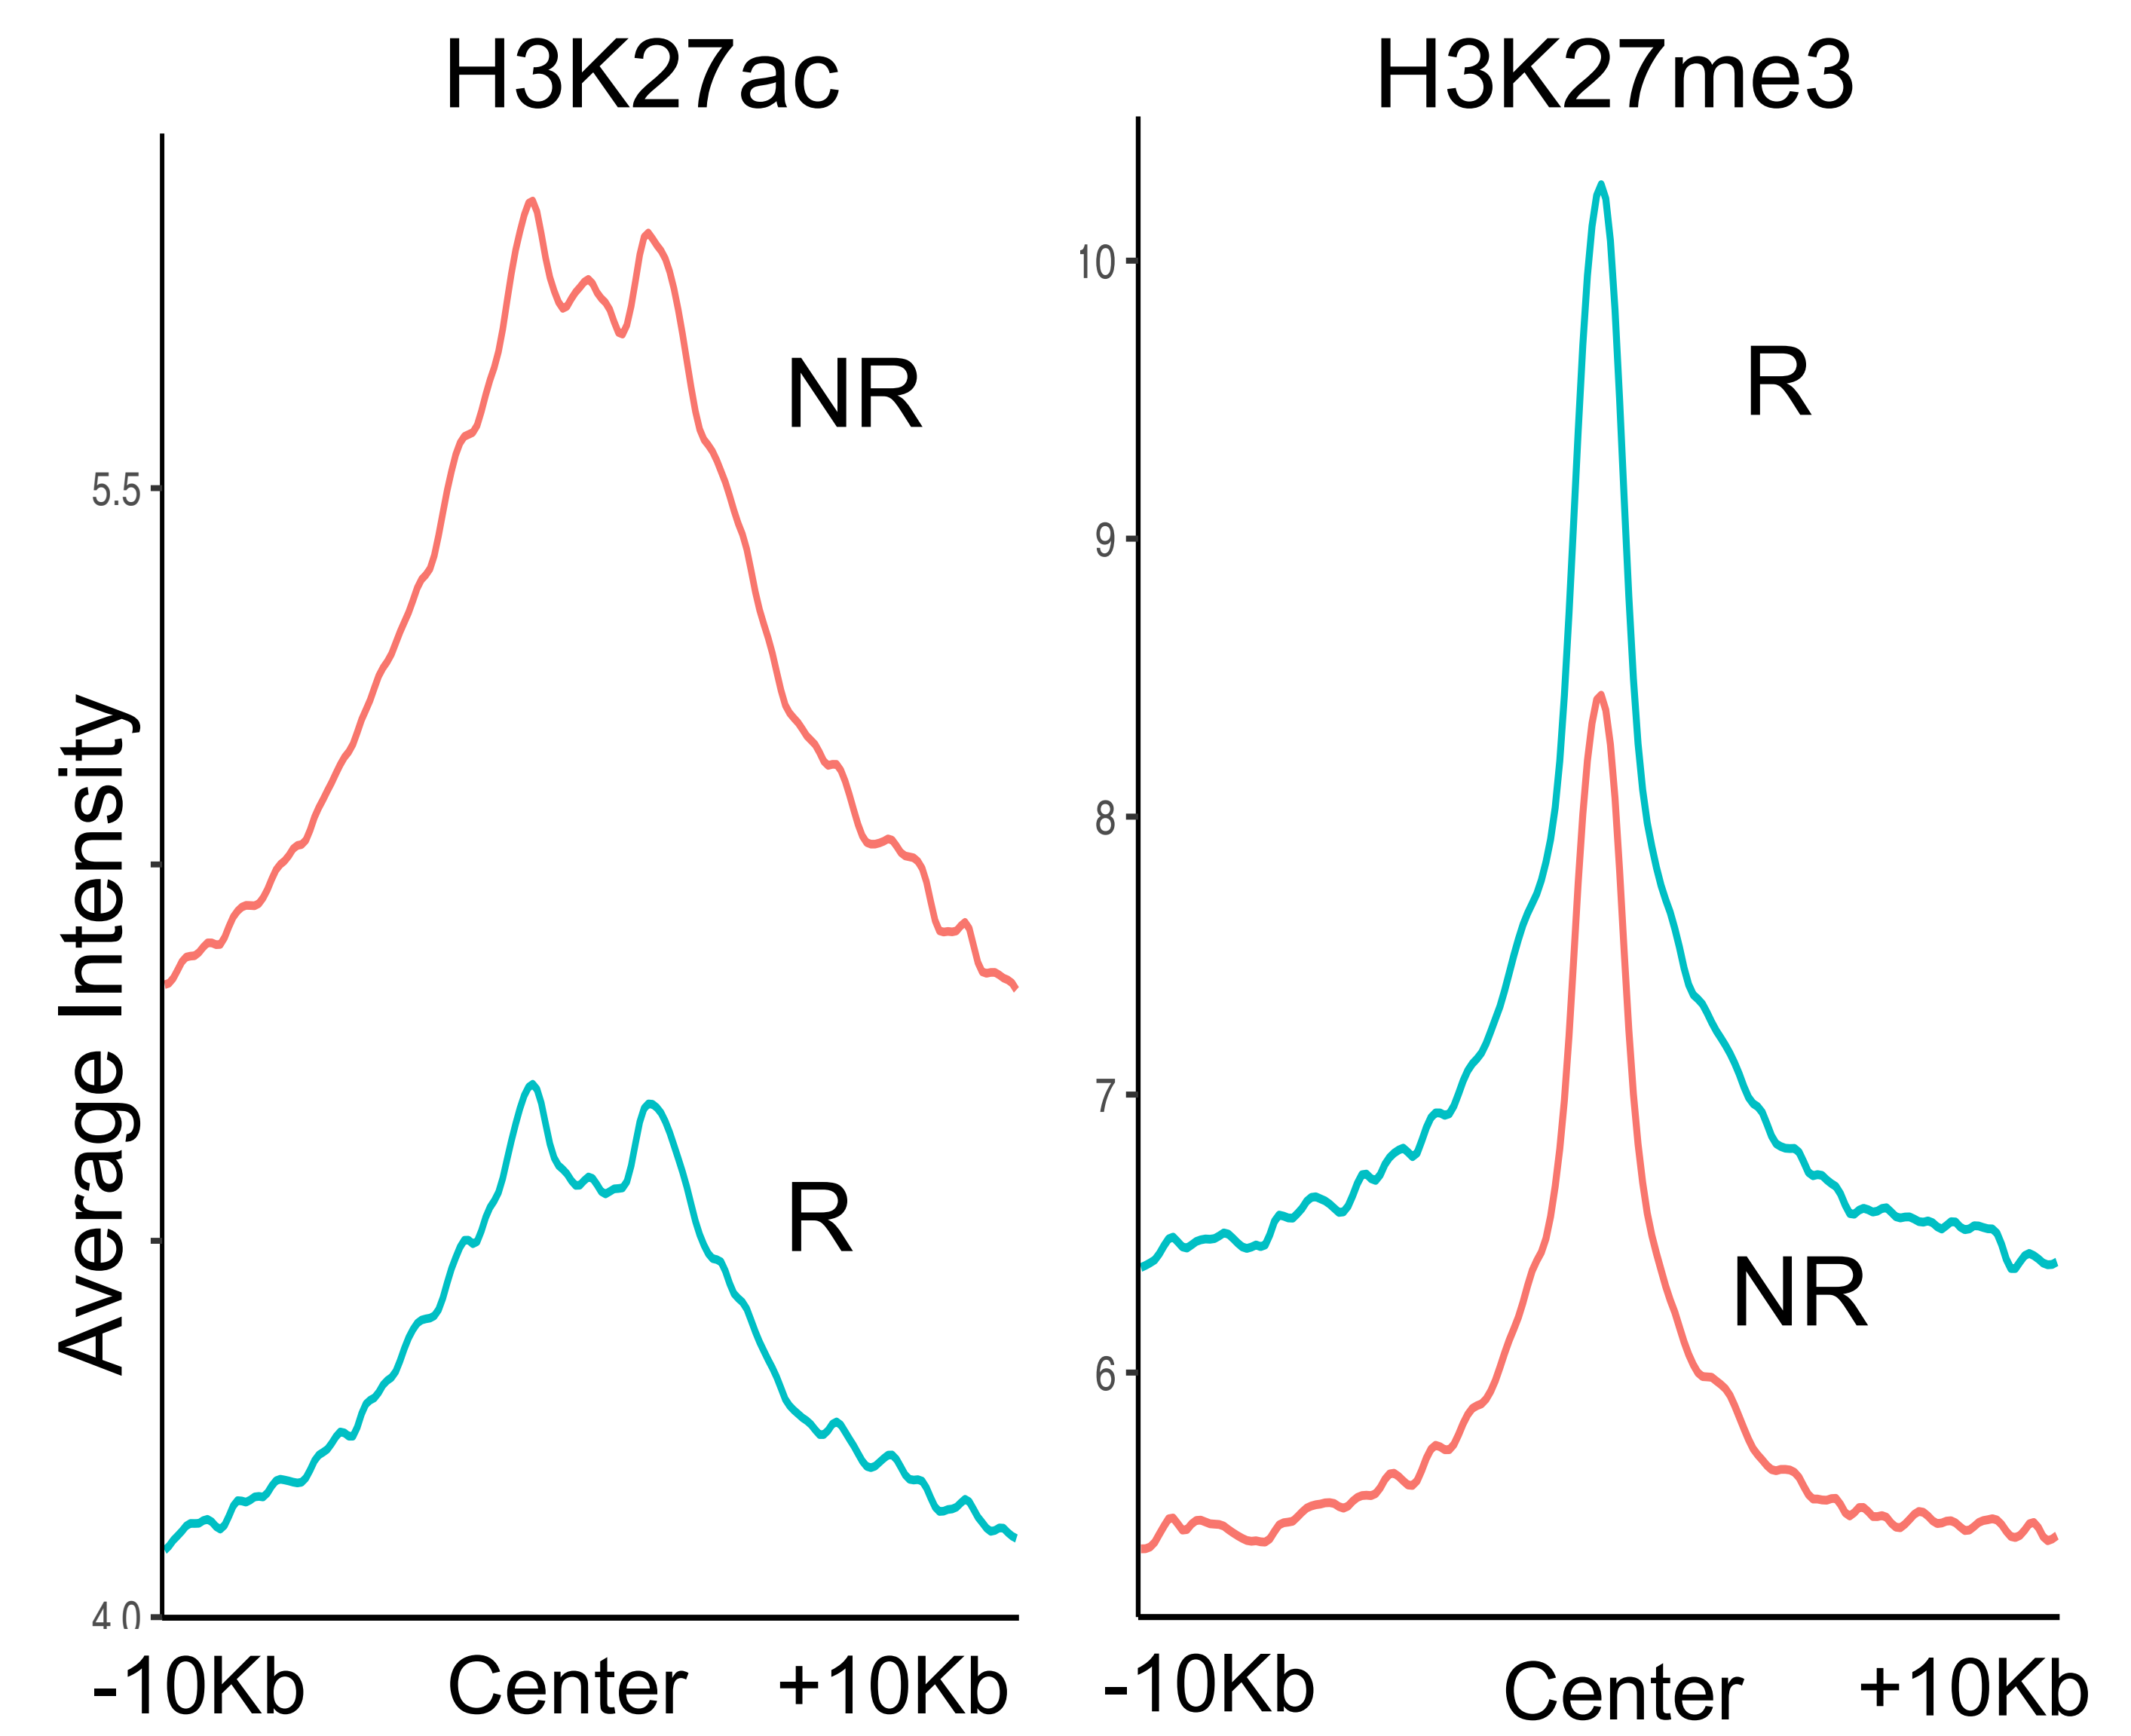

**H. Pathways Enriched in R-specific active enhancer (E7) state**

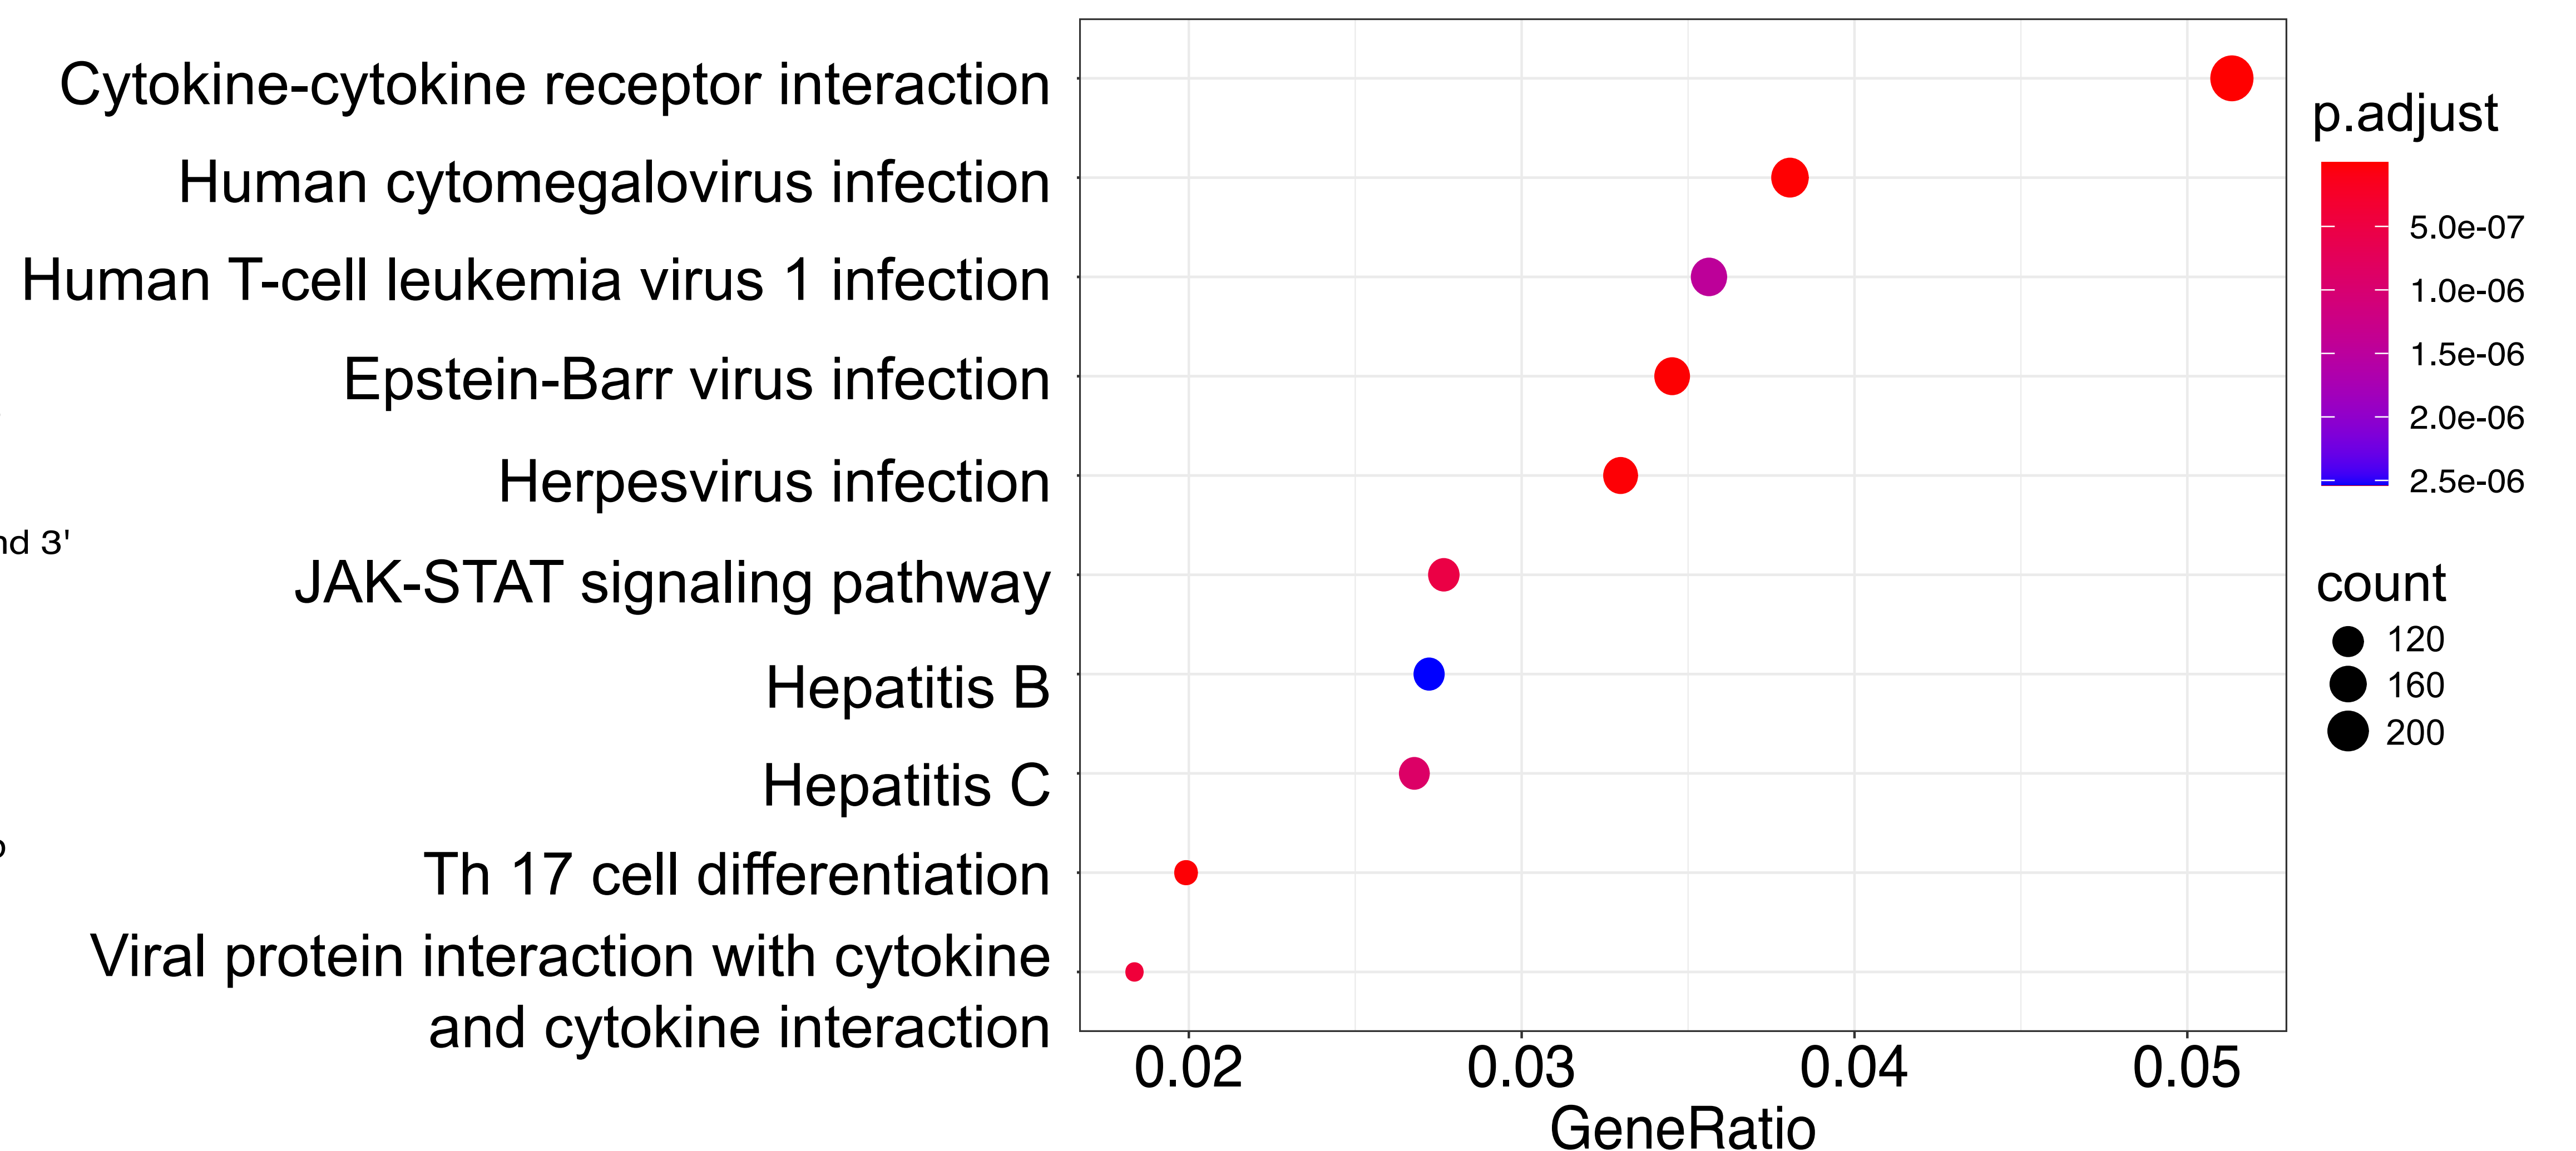

A.

Samples peak quality check using M-value and P-value filter

MDACC

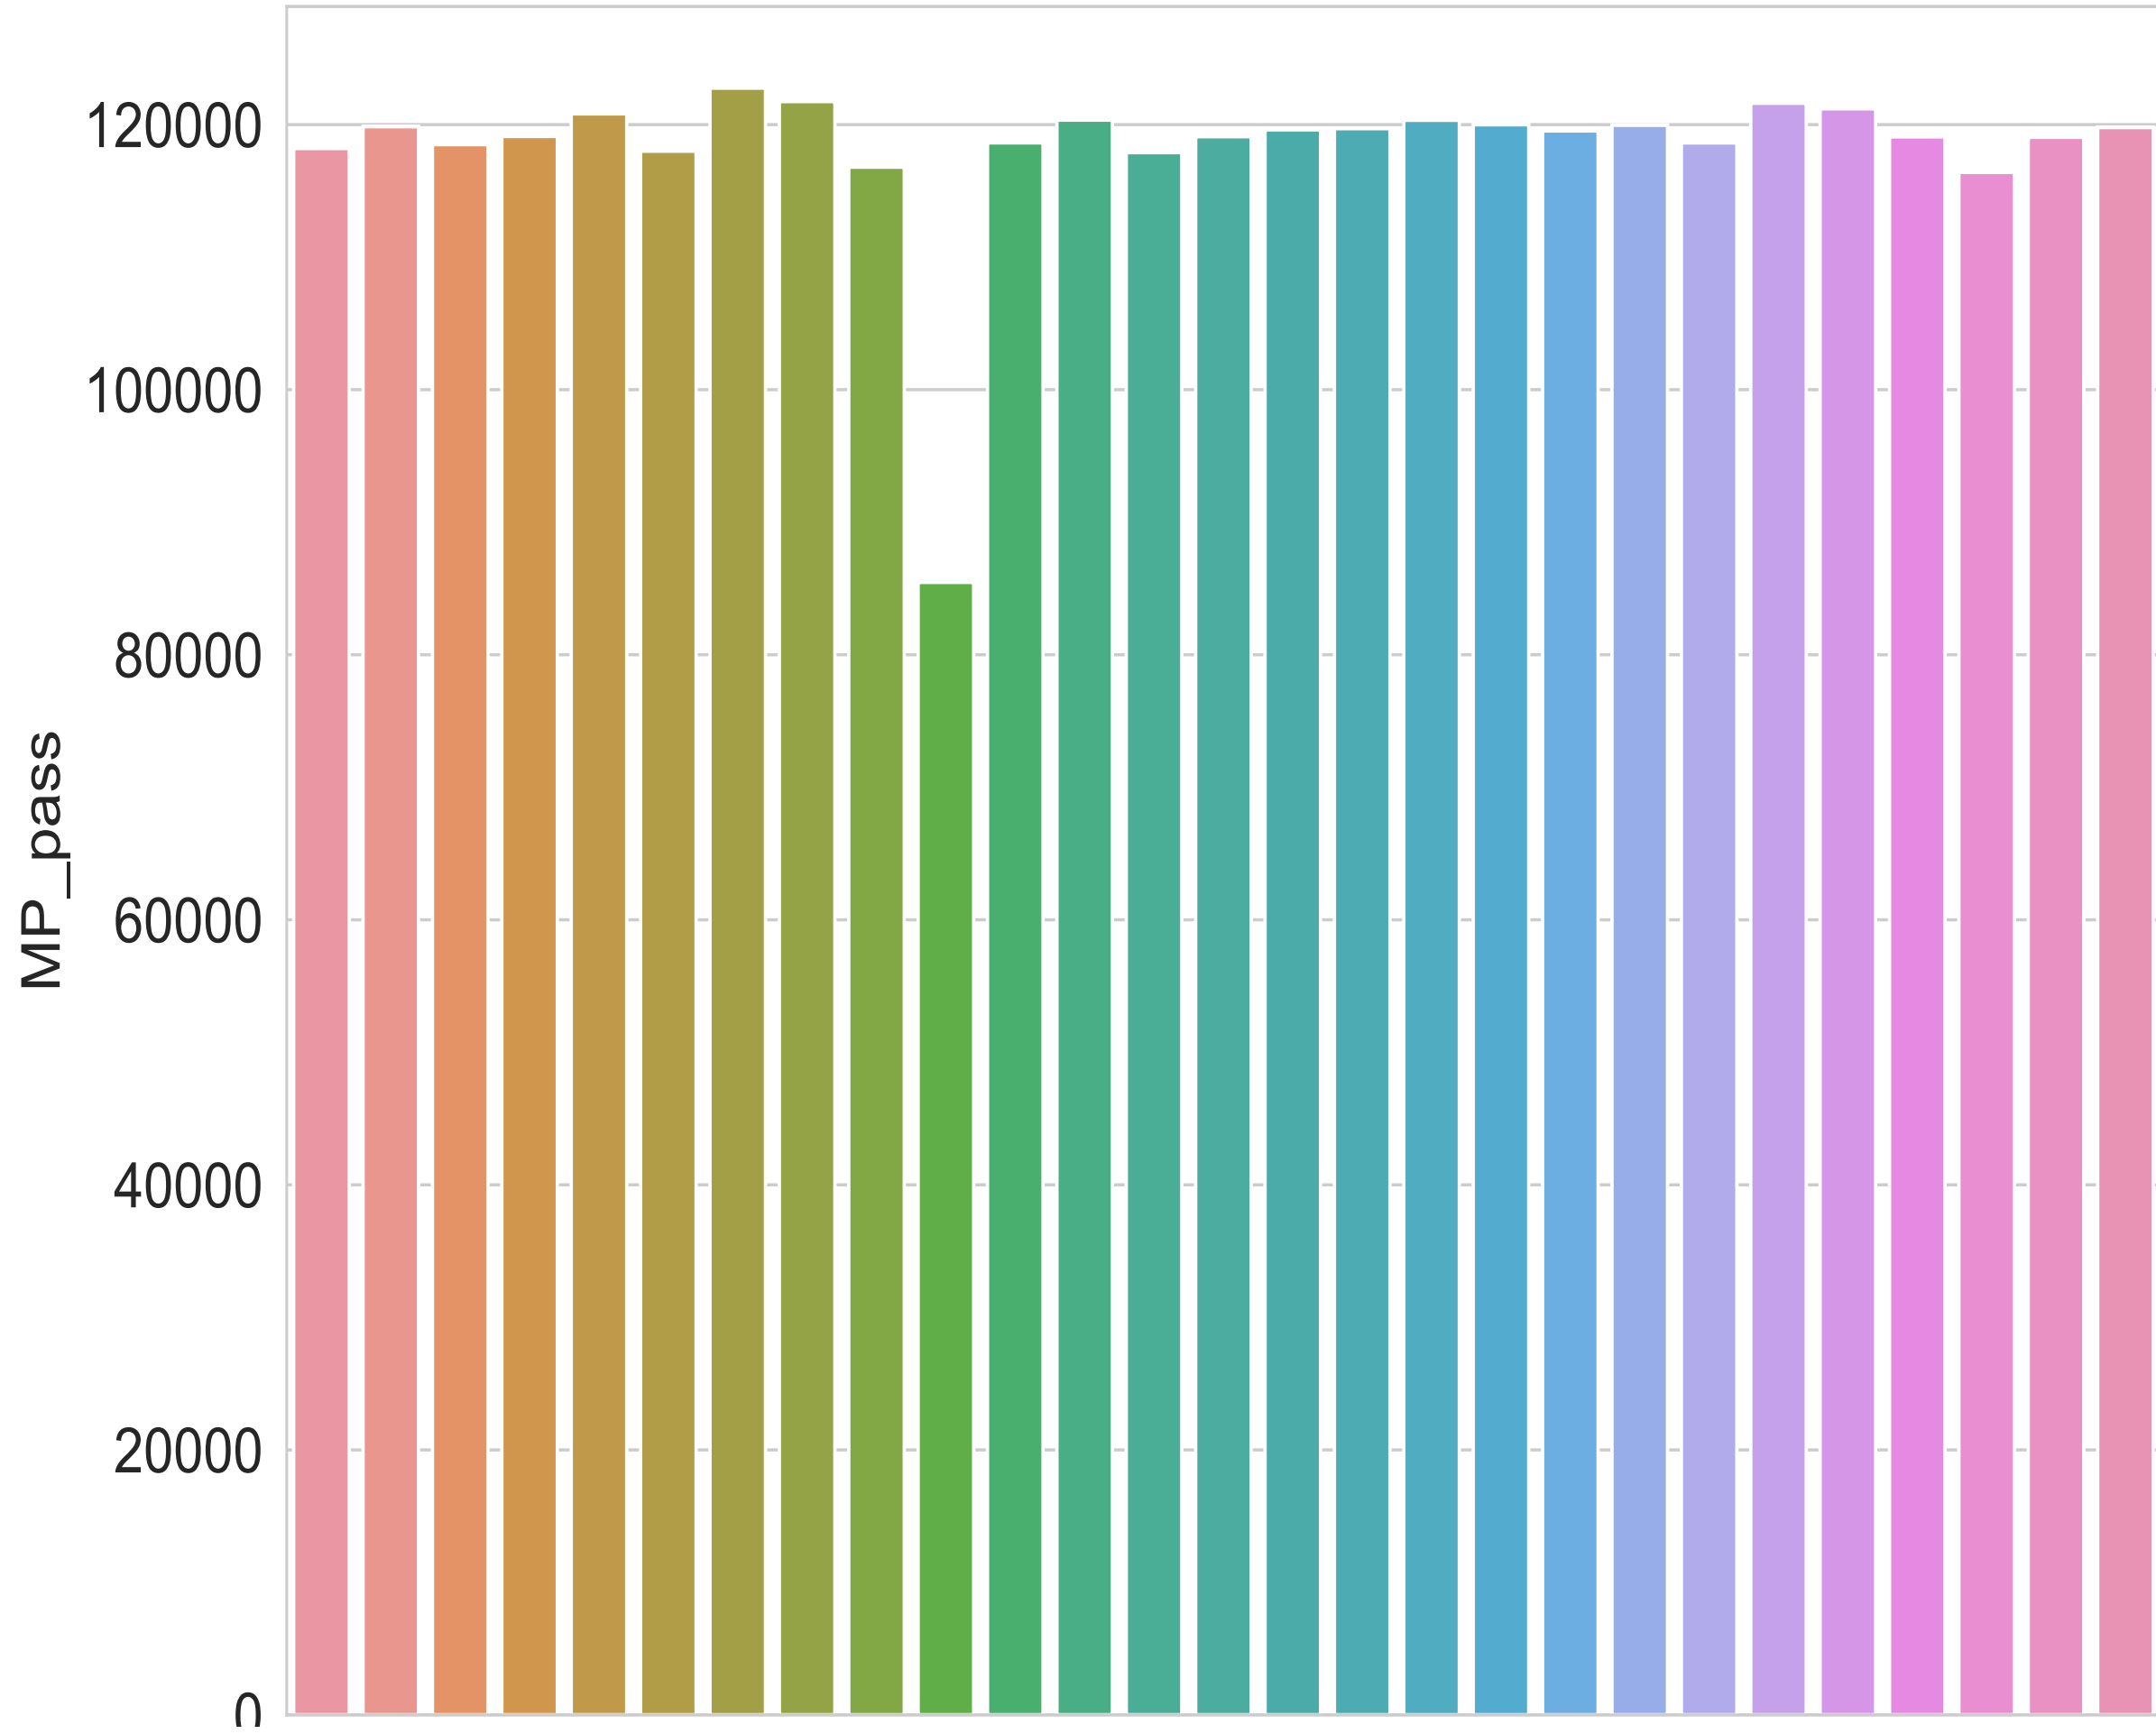

B.

MGH

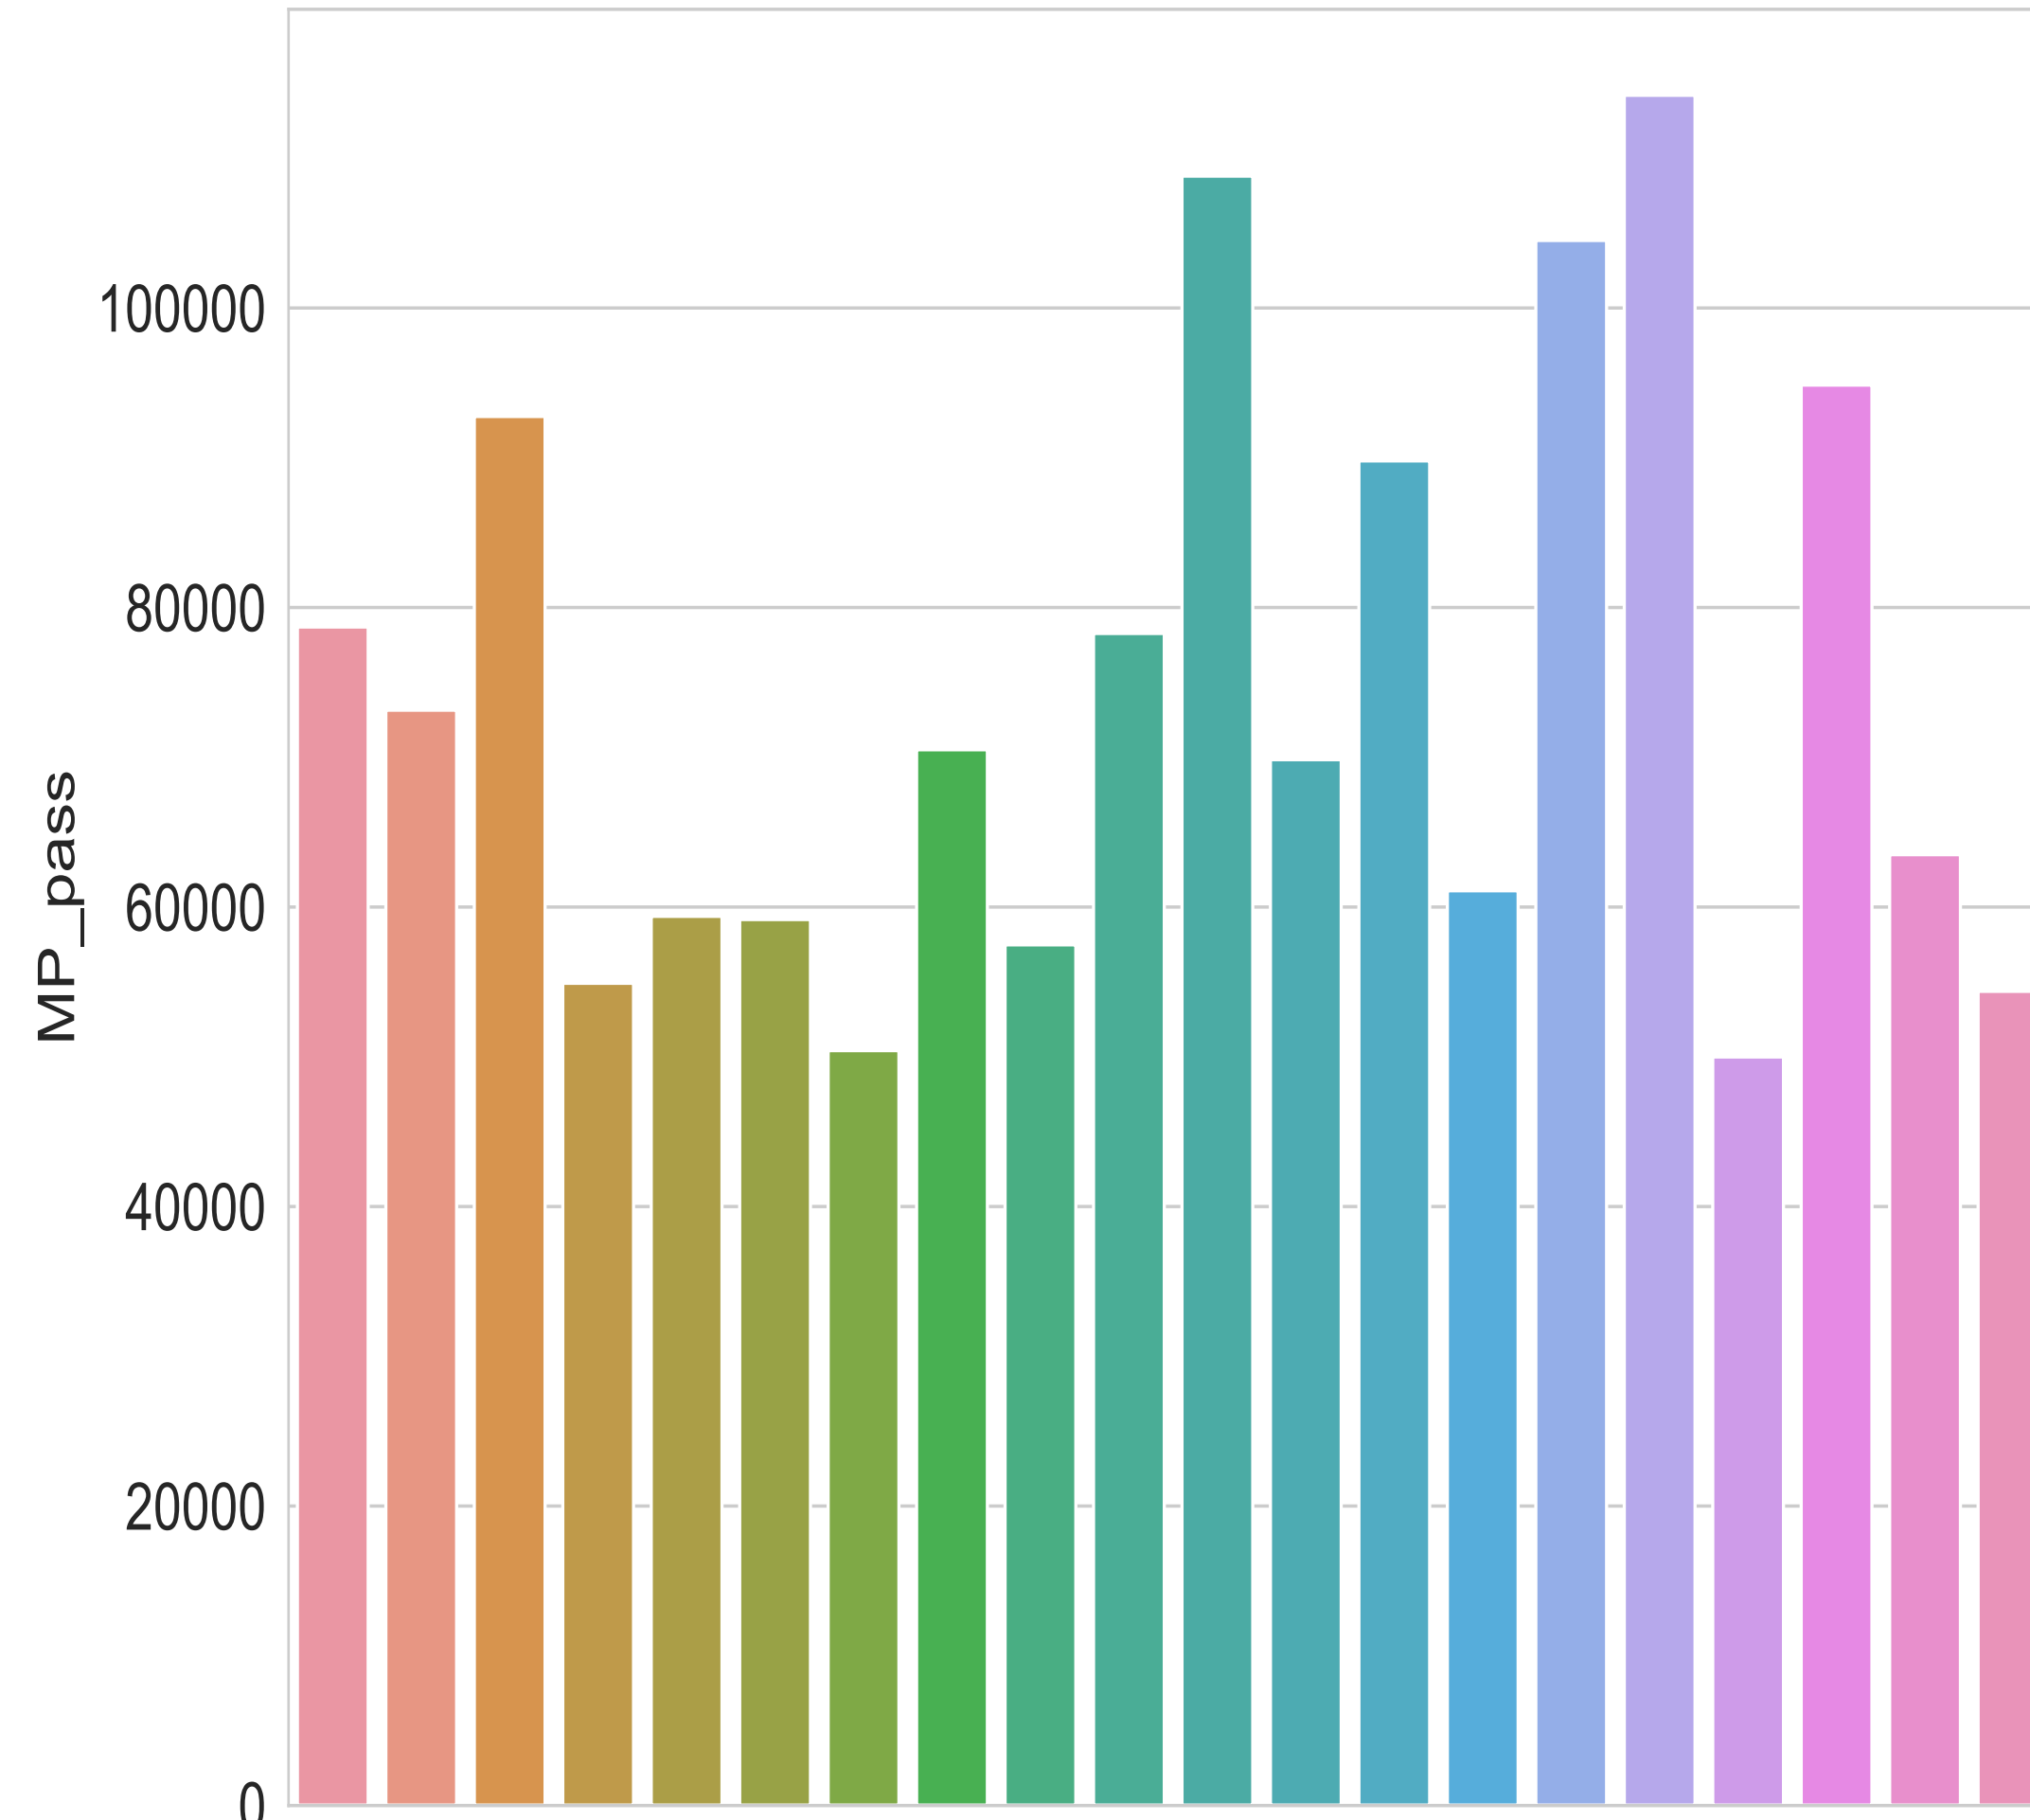

C.

Functional enrichments for the peaks passing the IDR threshold

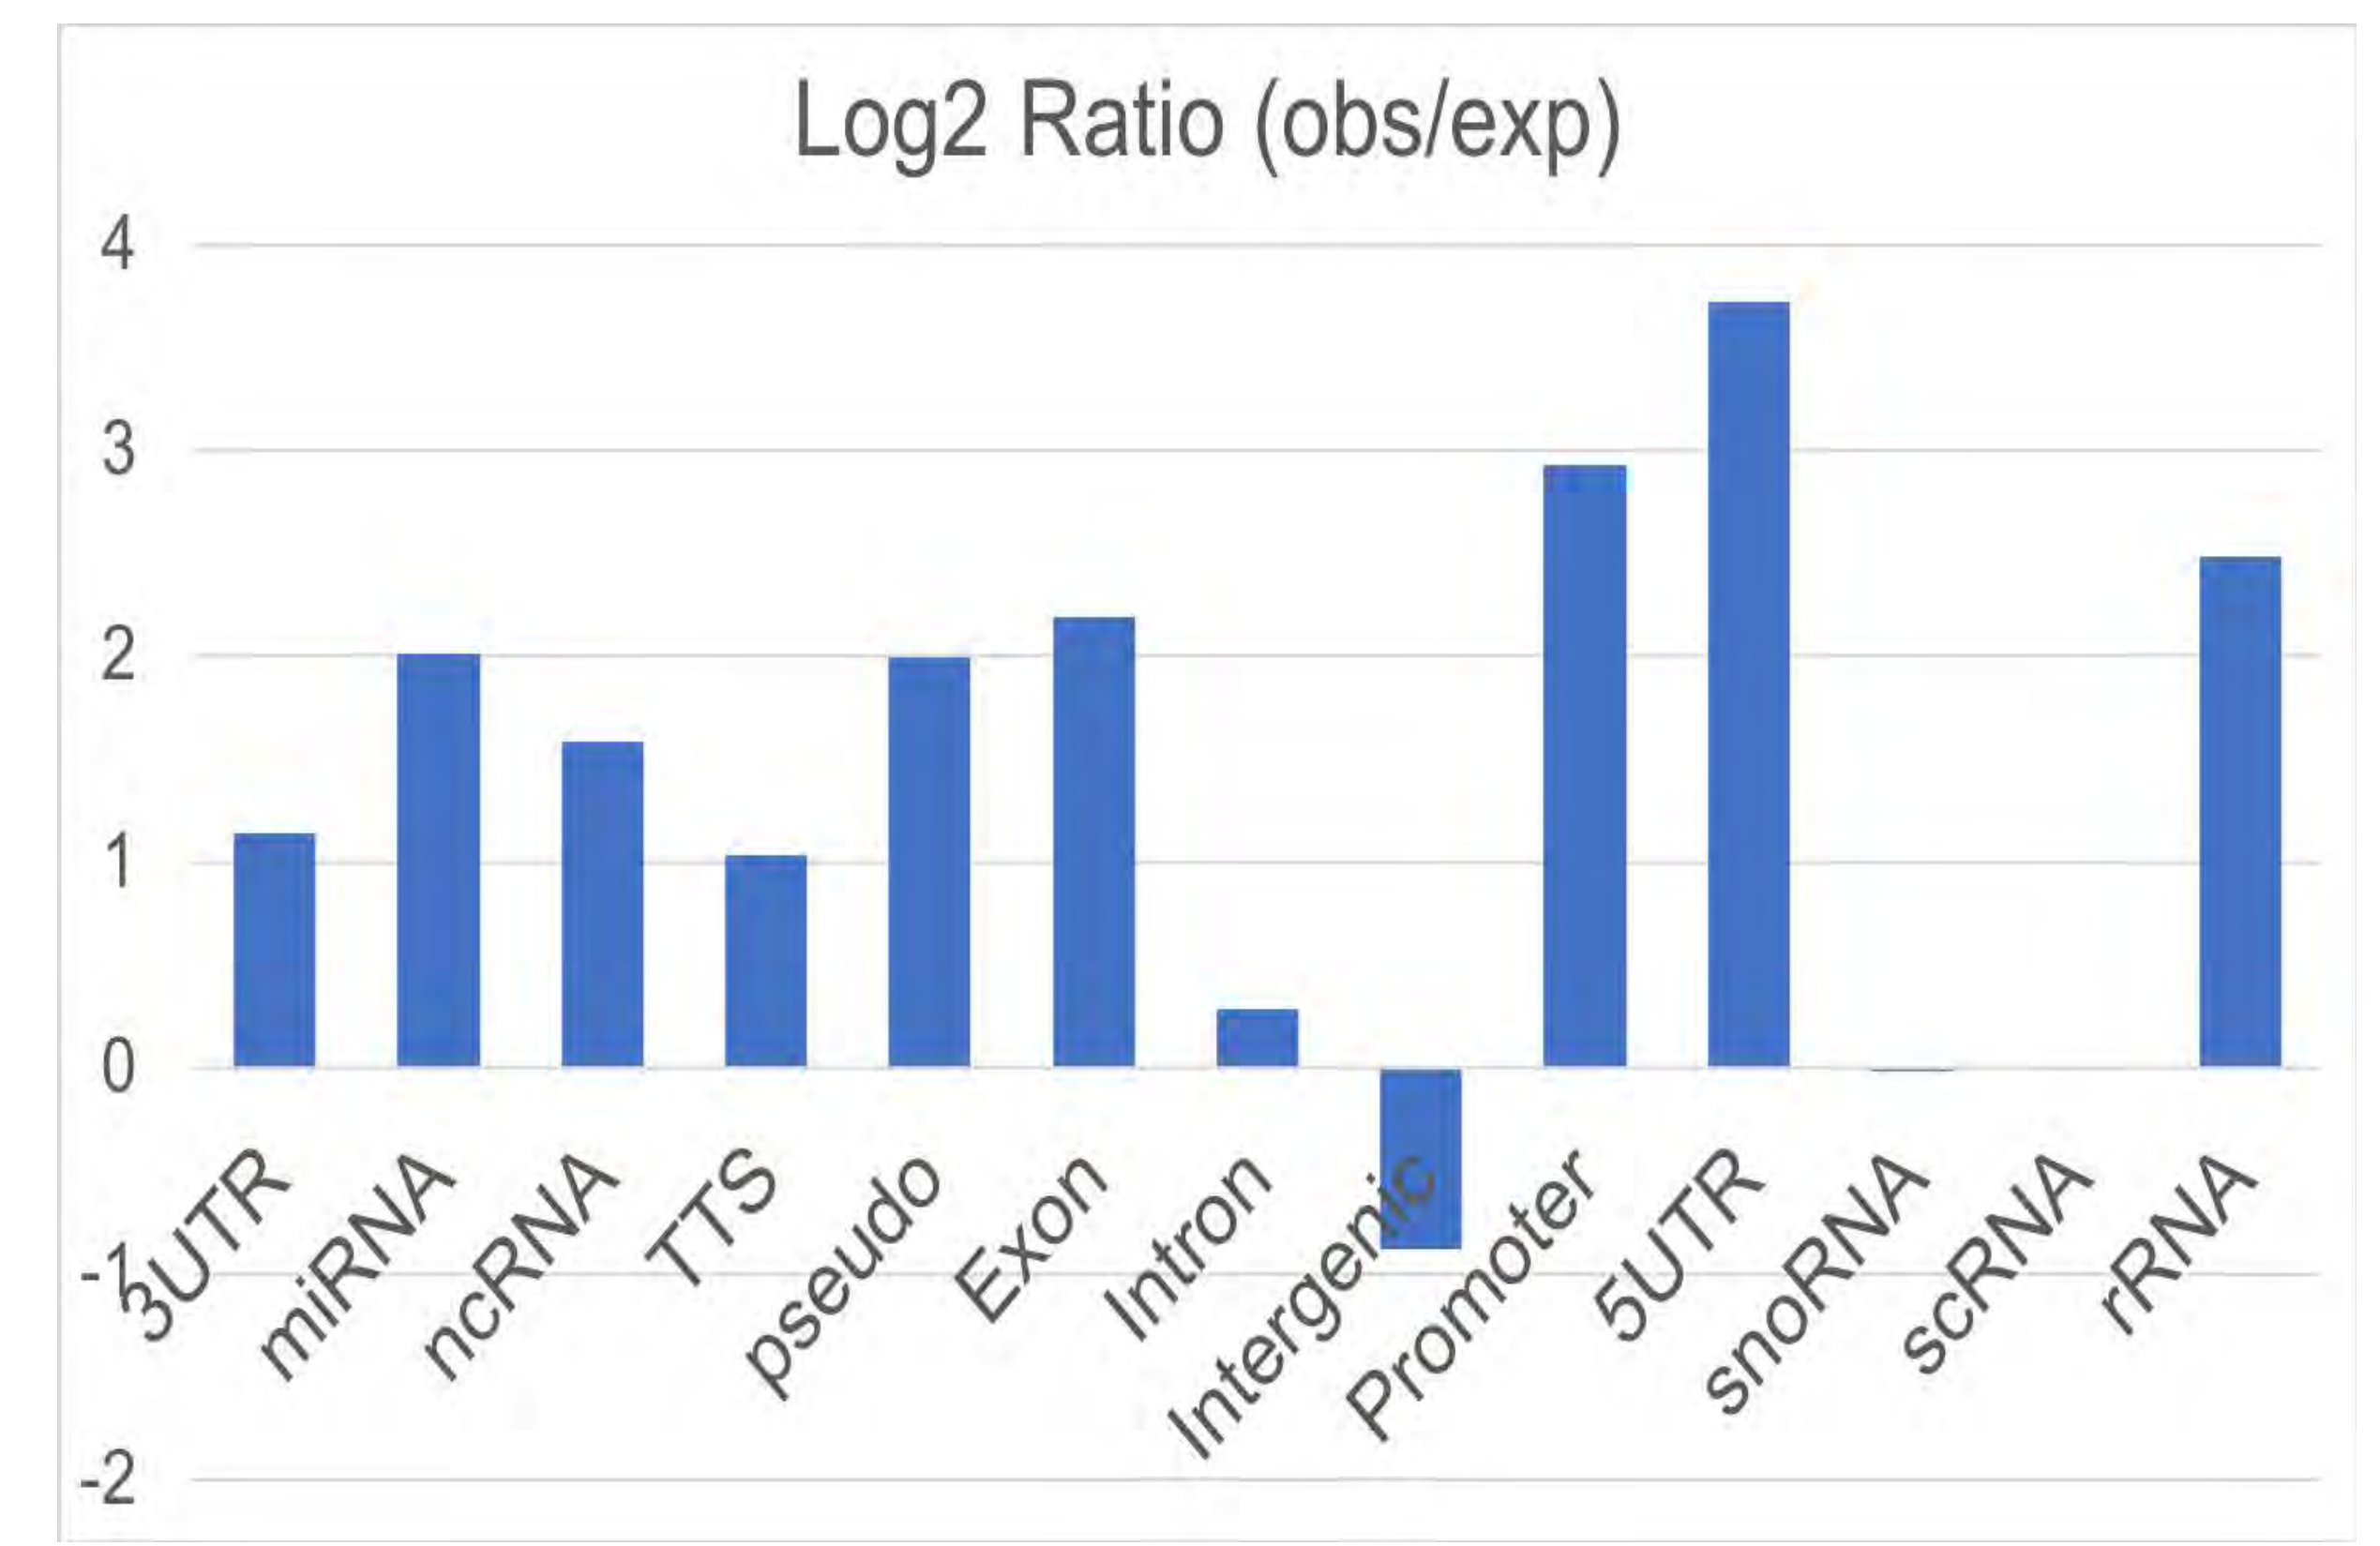

D.

MDACC vs MGH Q-Q plot Pre-Treatment

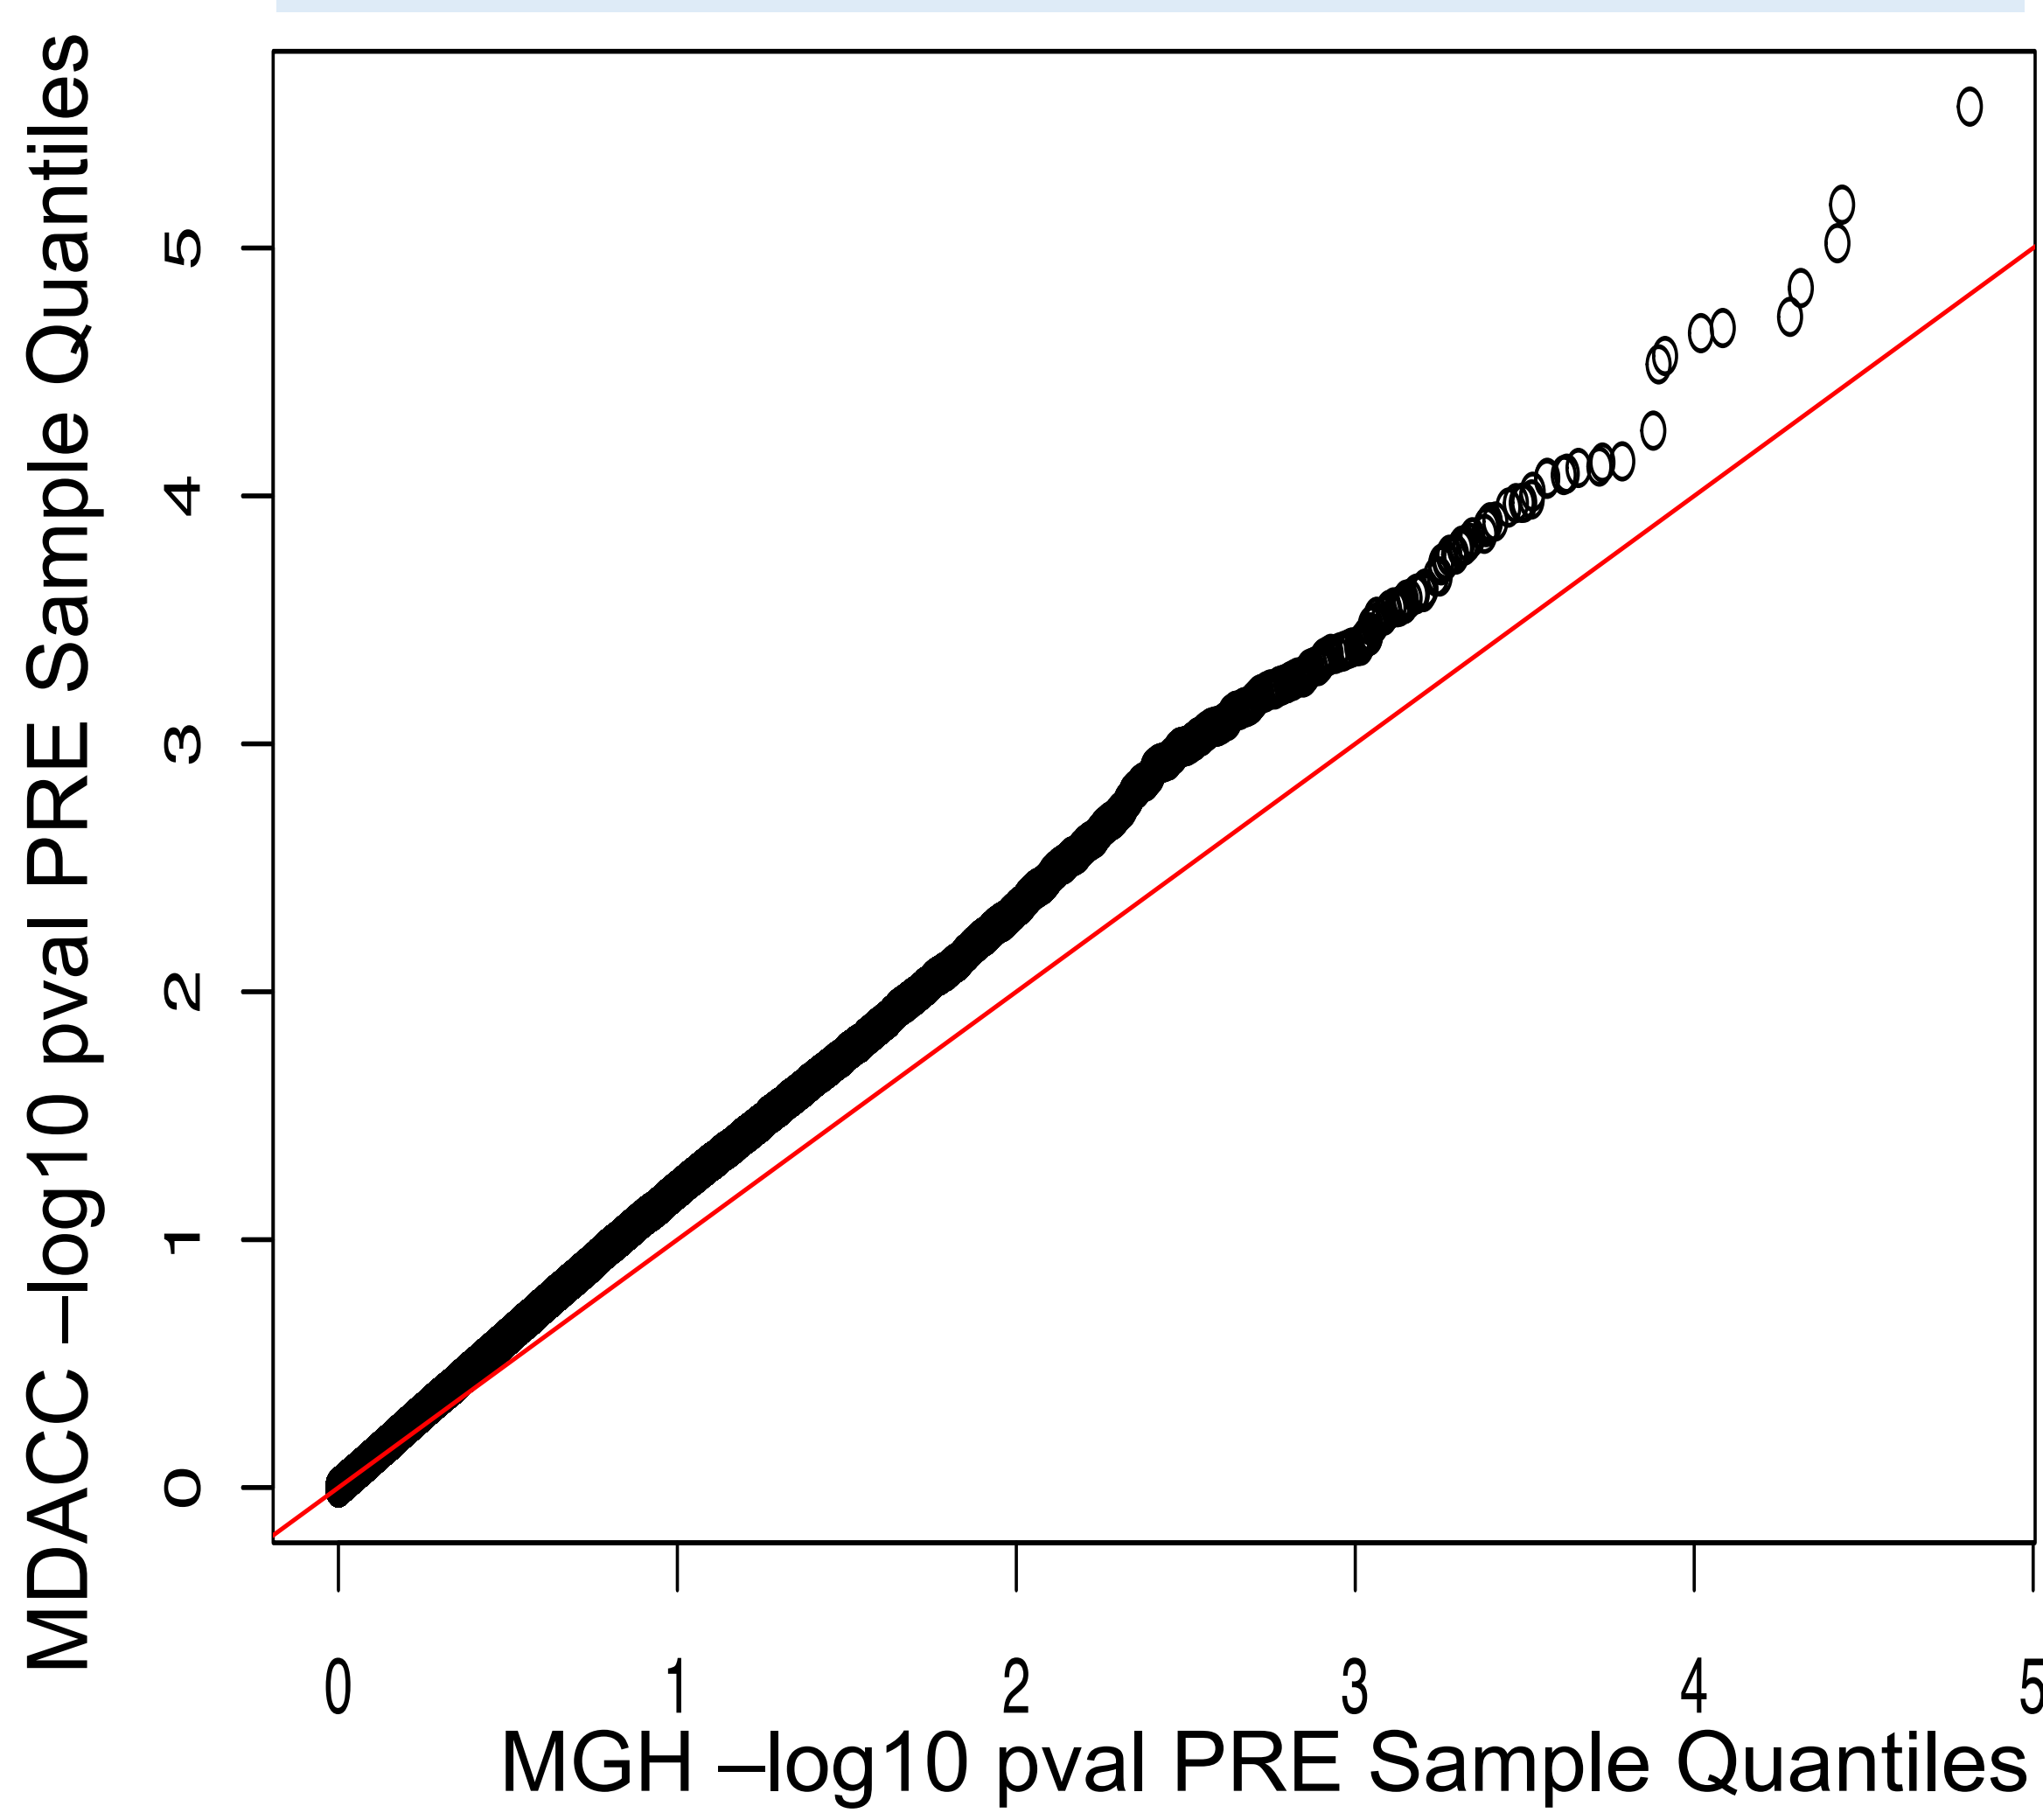

E.

MDACC vs MGH Q-Q plot On-Treatment

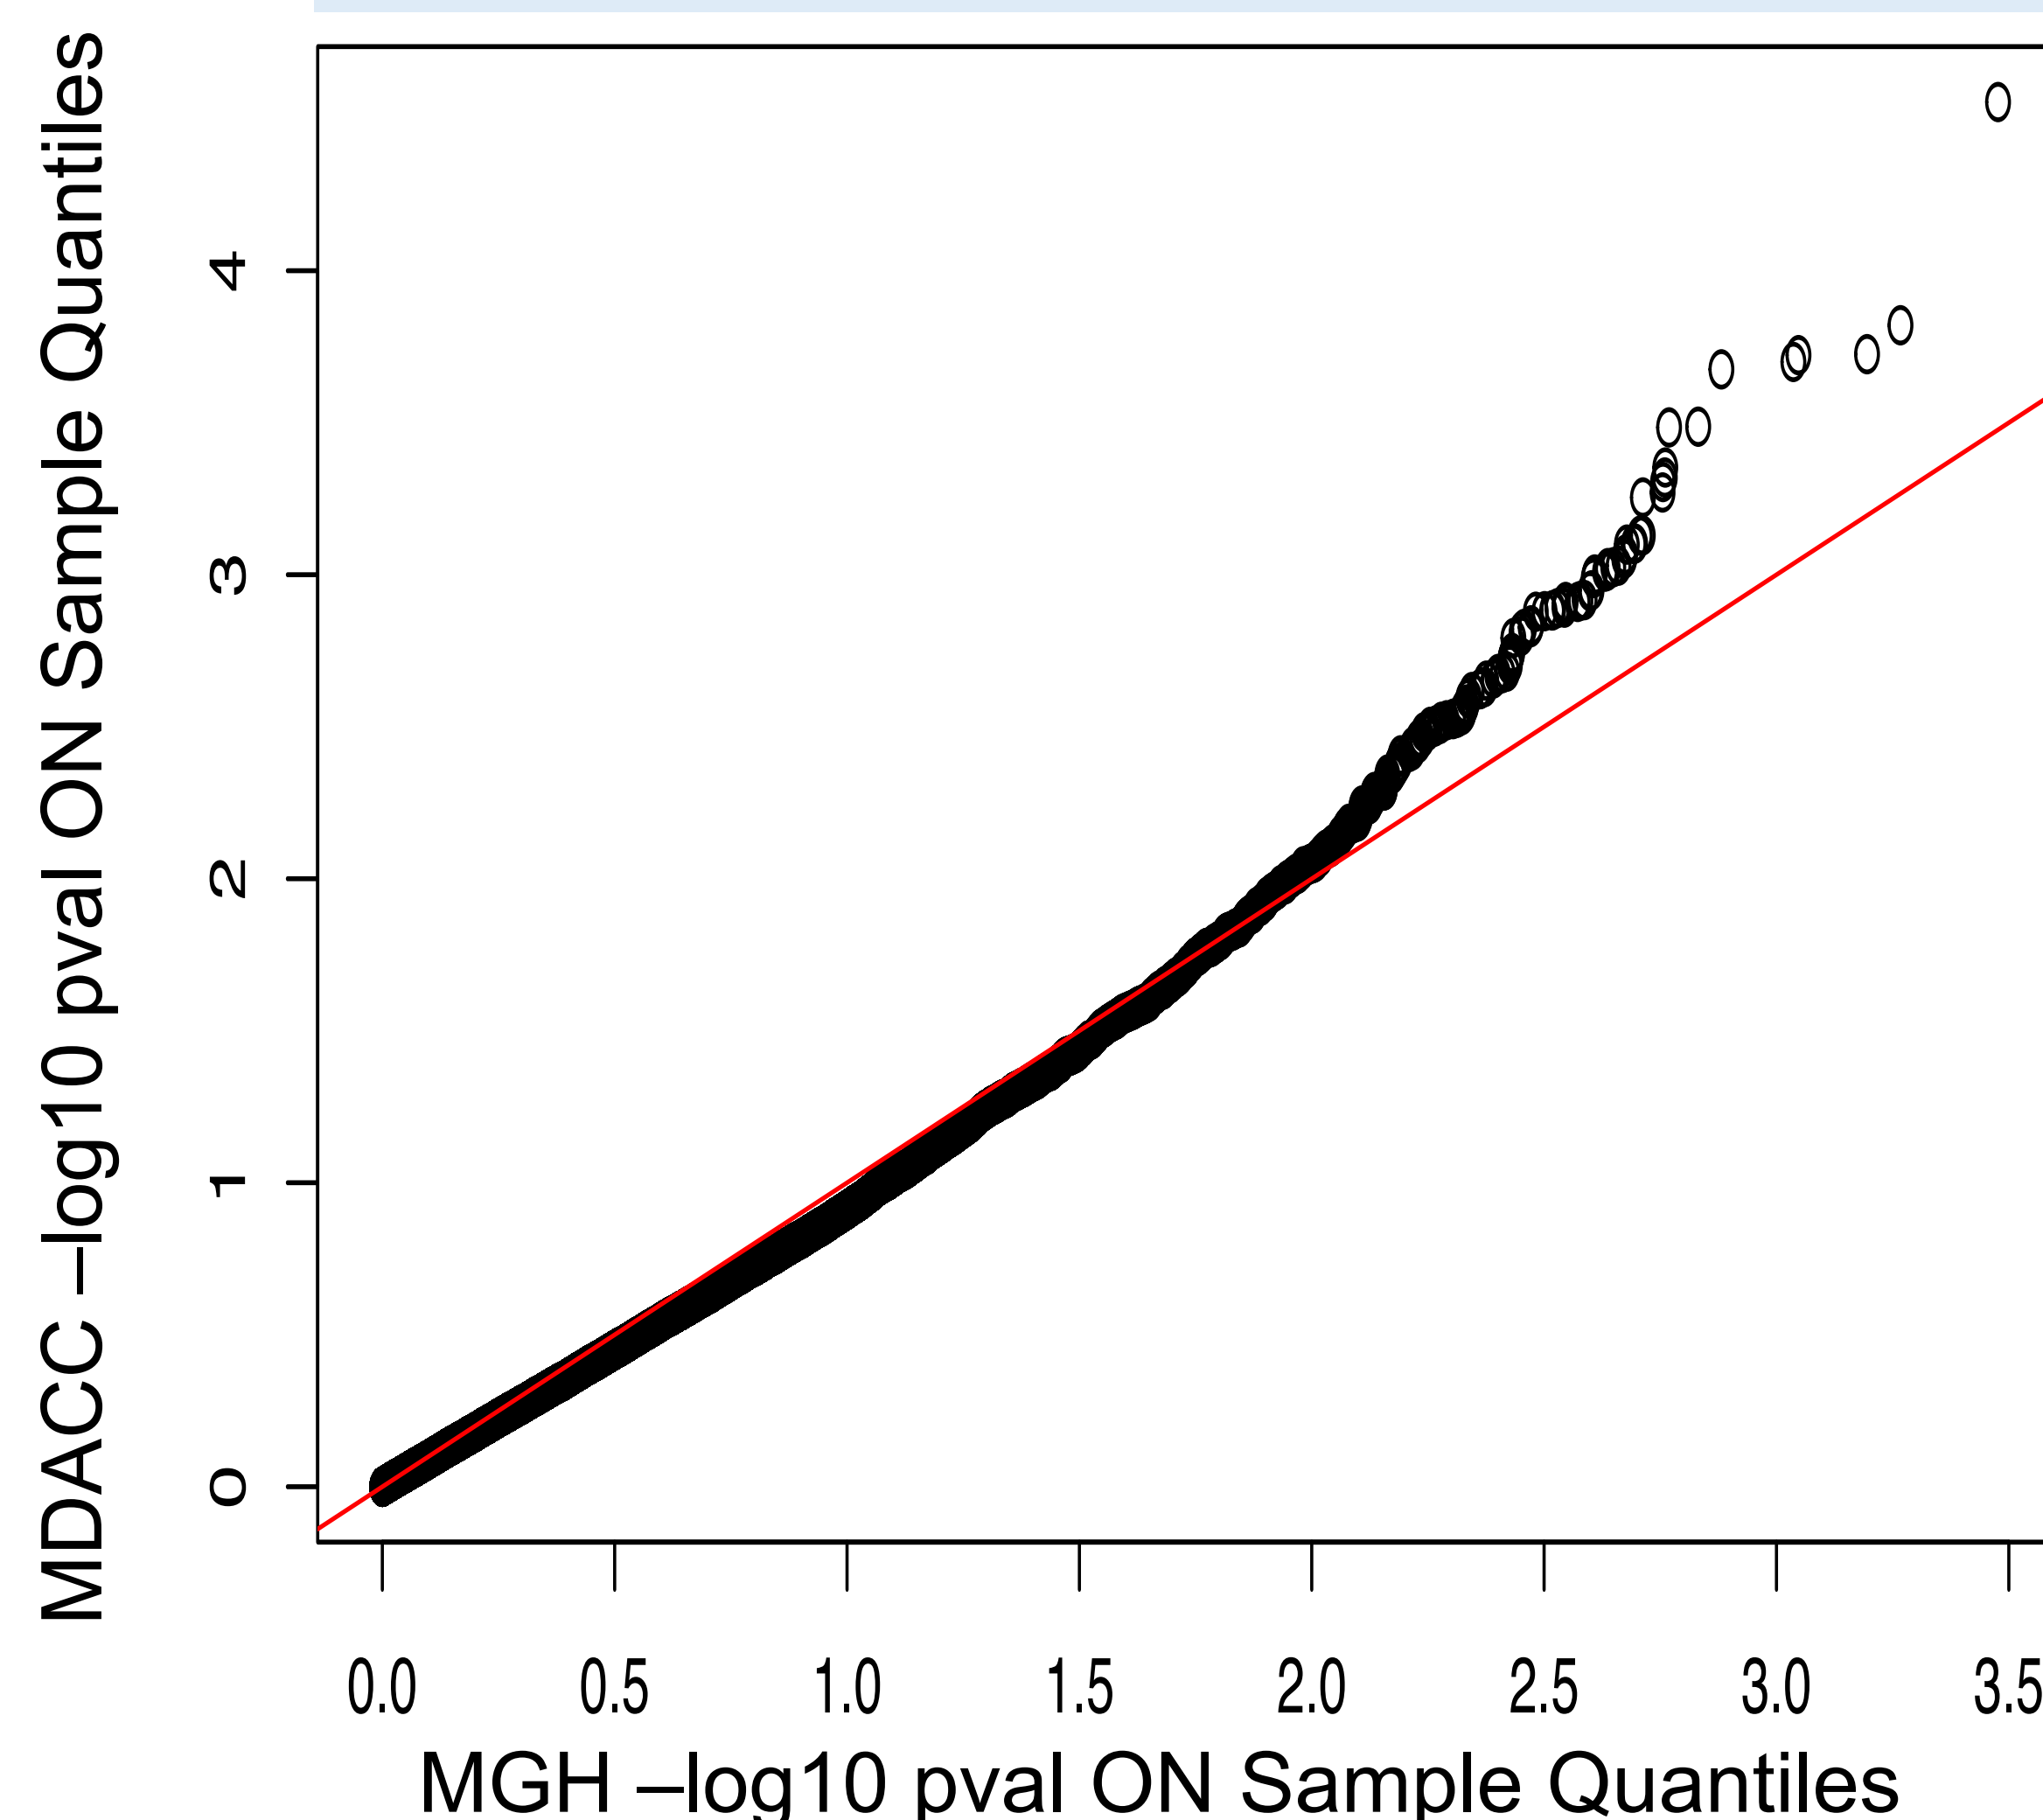

F.

Response Prediction using Replicated Peaks

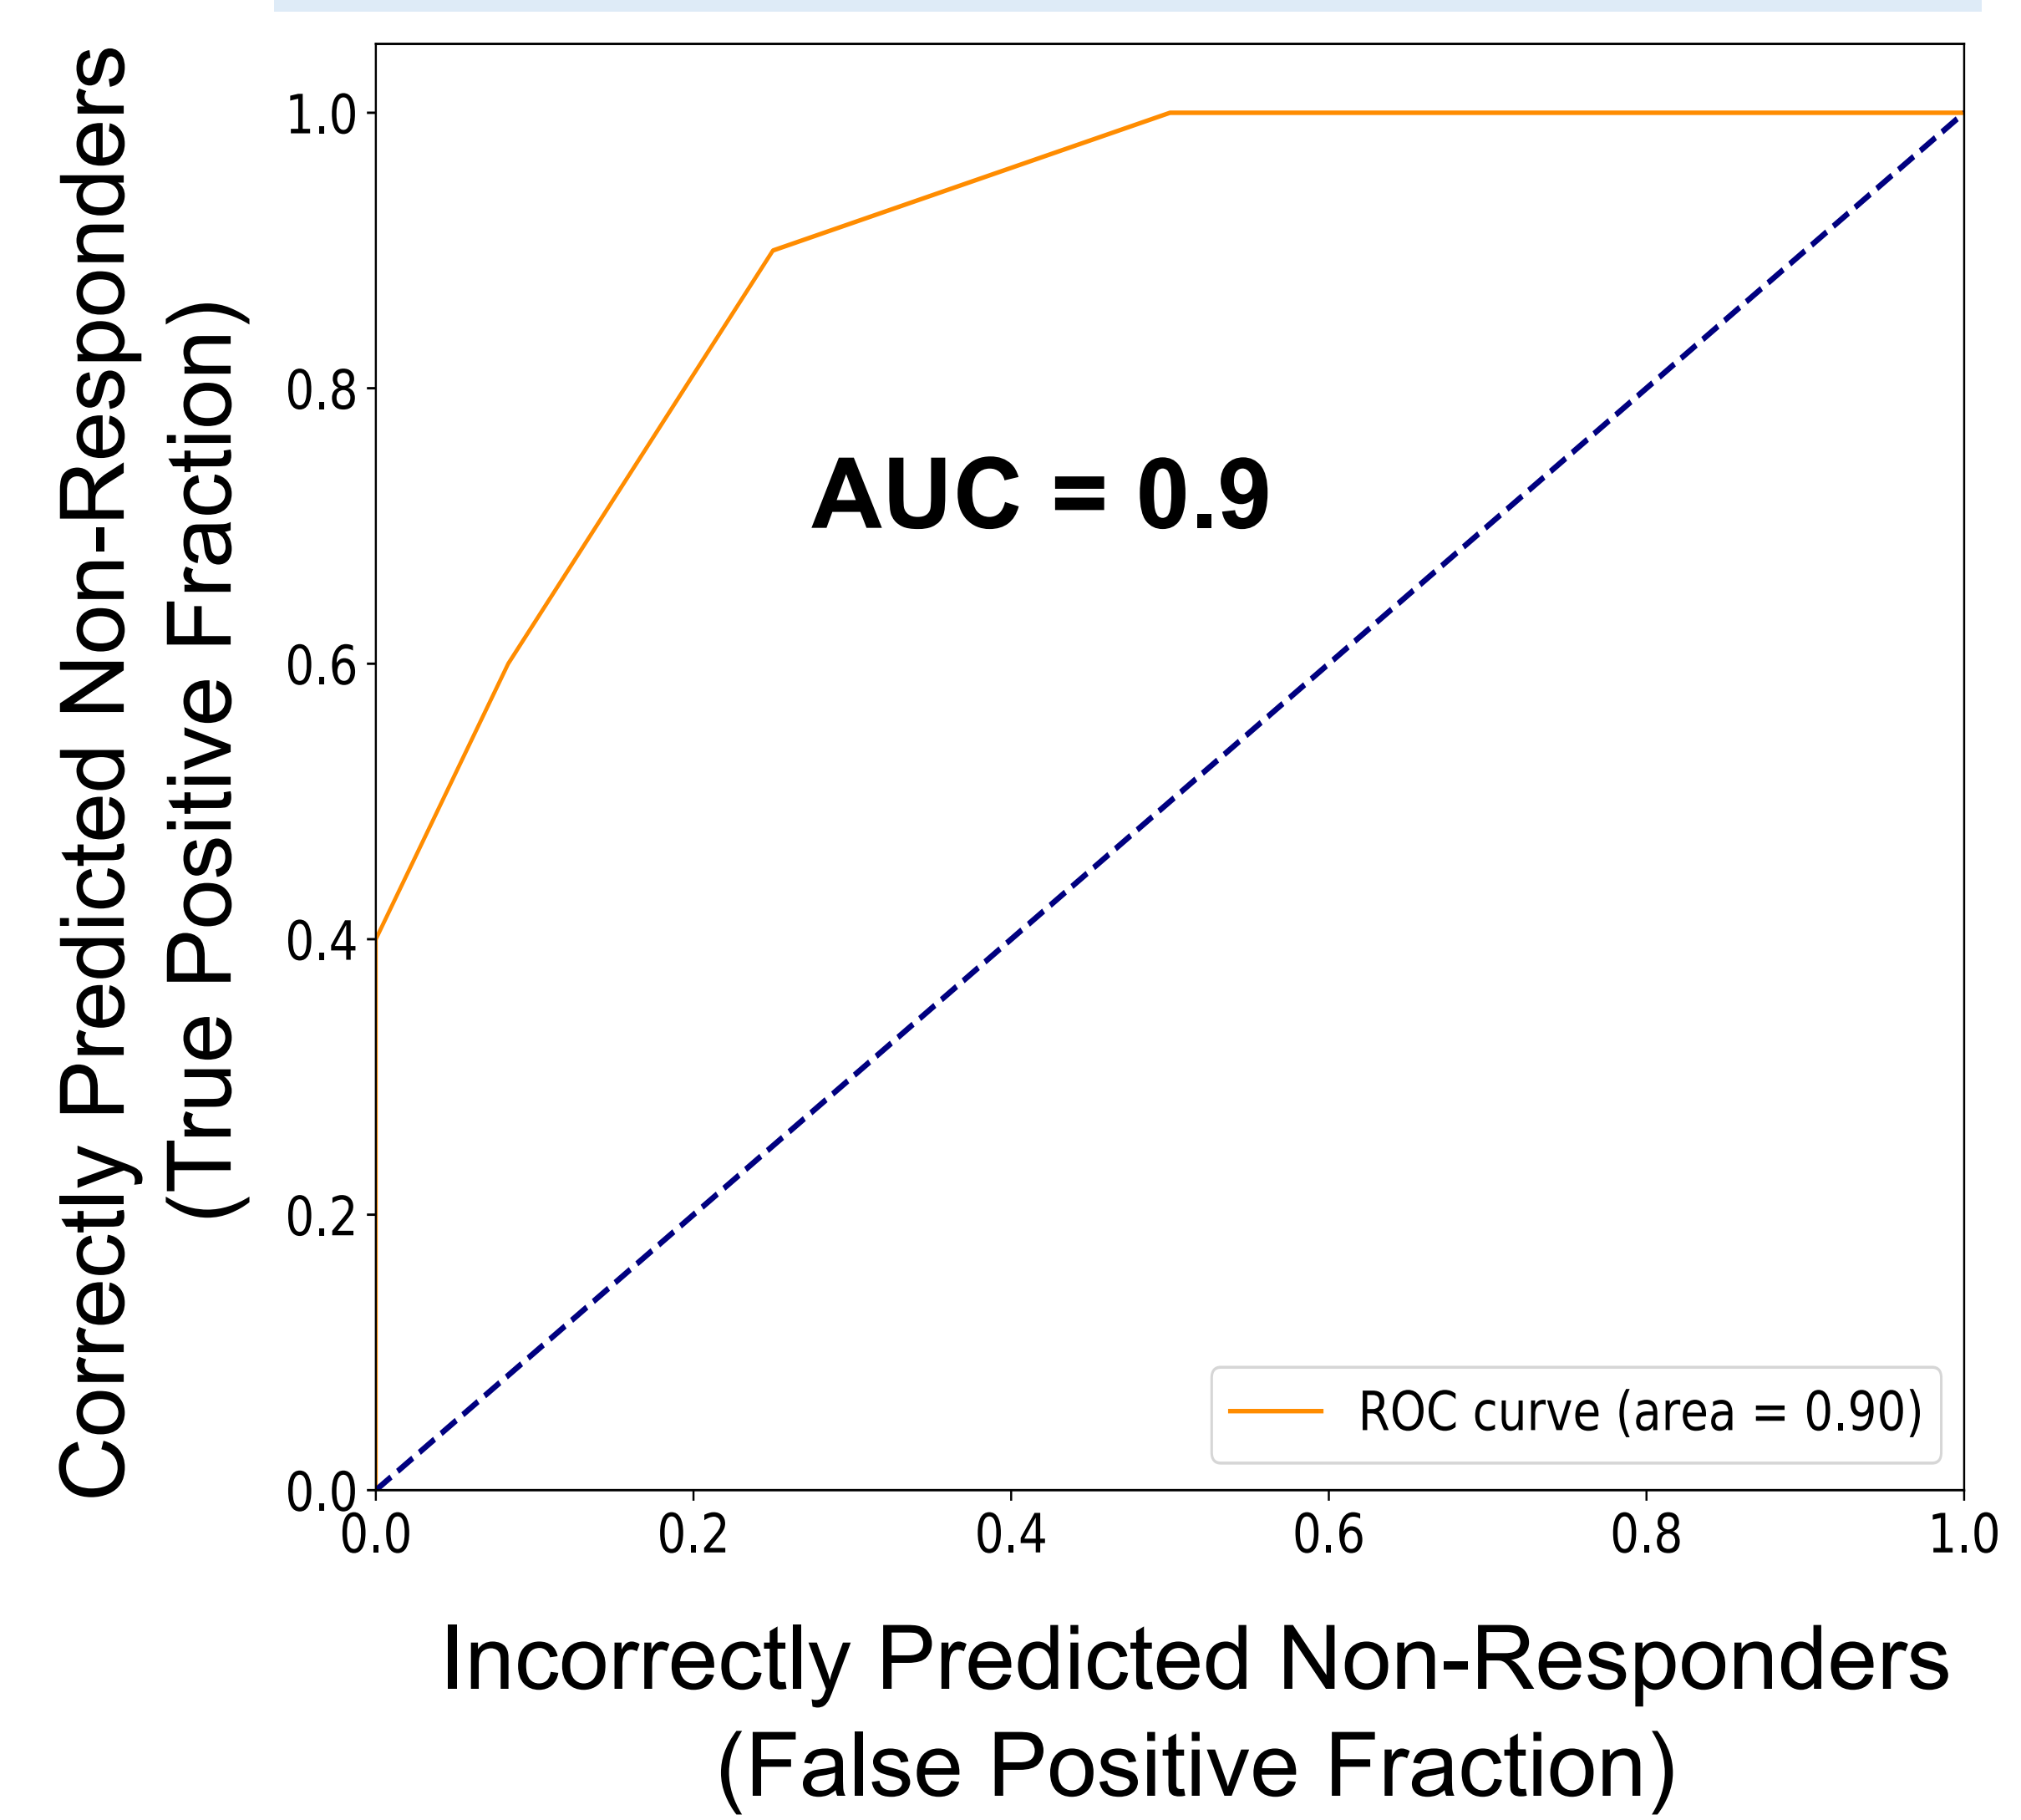

G.

Response Prediction in Samples with Shared ChIP-Seq & RNA-seq Data

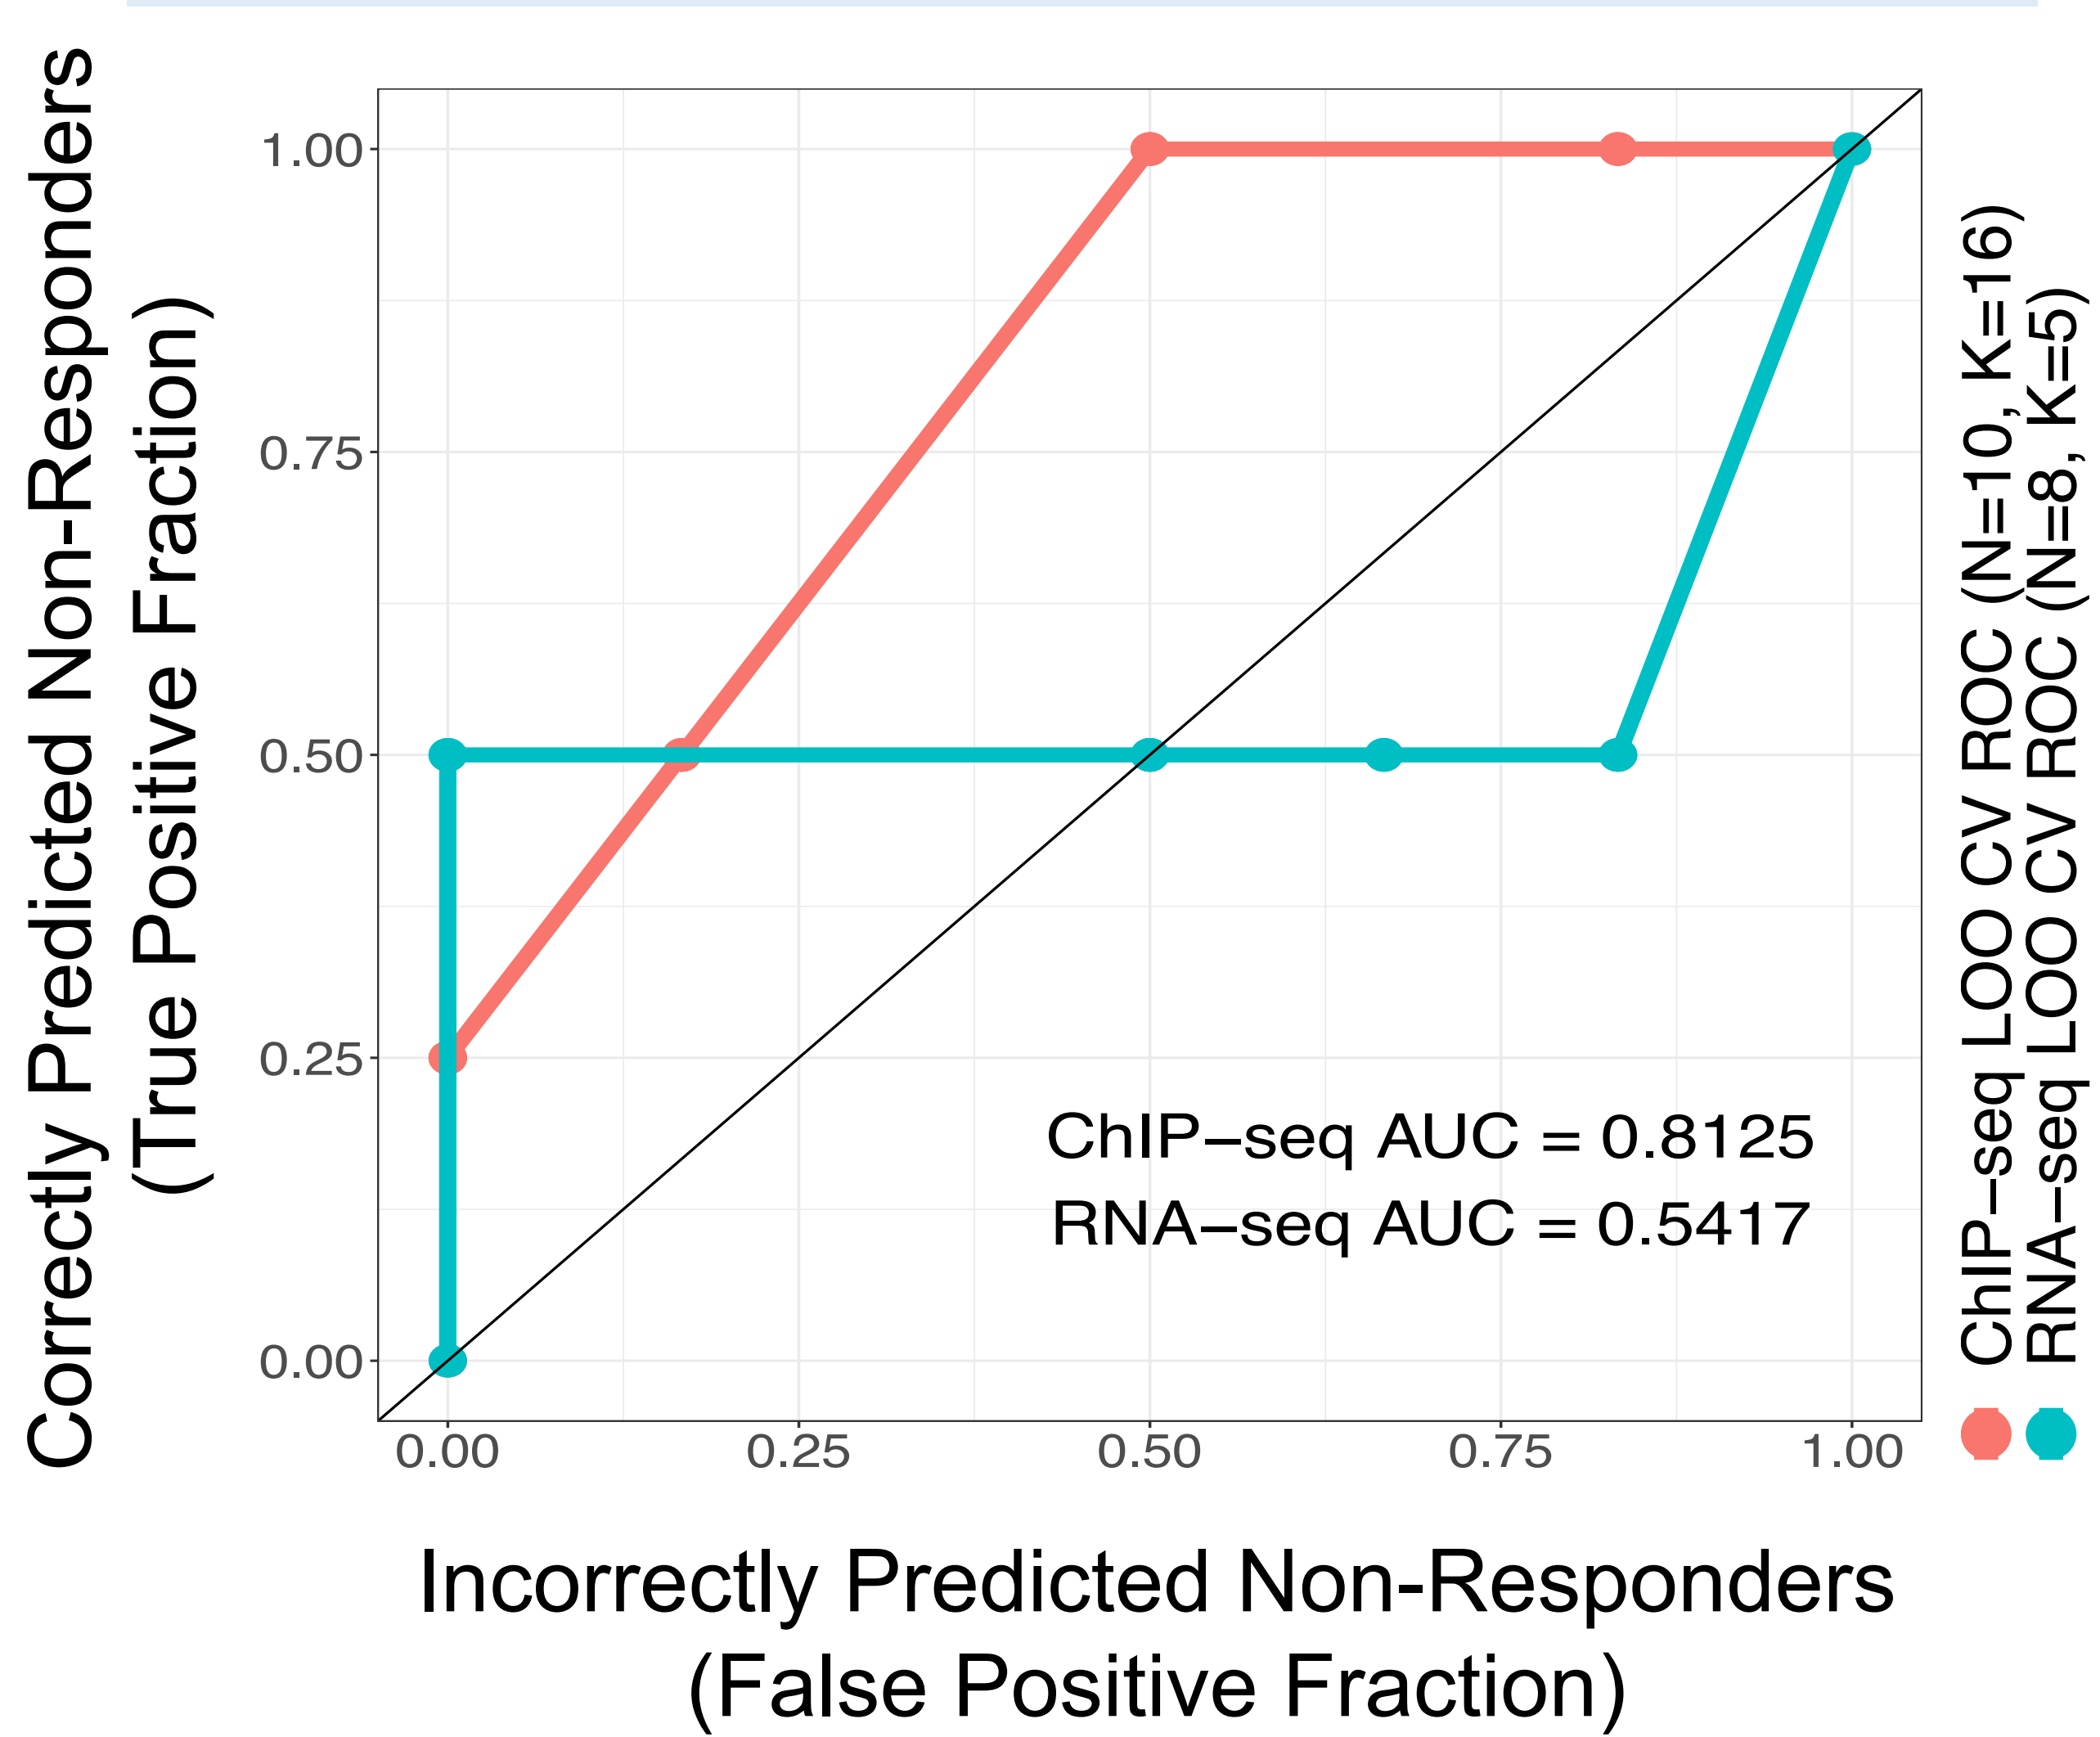

H.

Comparison of Predictive Power of Enhancer Signature with Published Biomarkers

| Study                       | Reported AUC | Assay type               | PMID     |
|-----------------------------|--------------|--------------------------|----------|
| This                        | 0.842        | Tissue ChIP-seq          |          |
| Auslander et al. literature | 0.73-0.96    | Tissue RNA-seq           | 30127394 |
| Auslander et al. heldout    | 0.83         | Tissue RNA-seq           | 30127394 |
| Johannet et al.             | 0.805        | AI+ clinical + histology | 33208341 |
| Shi et al.                  | 0.737        | Exosomal RNA             | 33188016 |
| Yan et al.                  | 0.664        | Tumor Mutational Burden  | 33240814 |

I.

Tumor Mutational Burden (TMB) Score

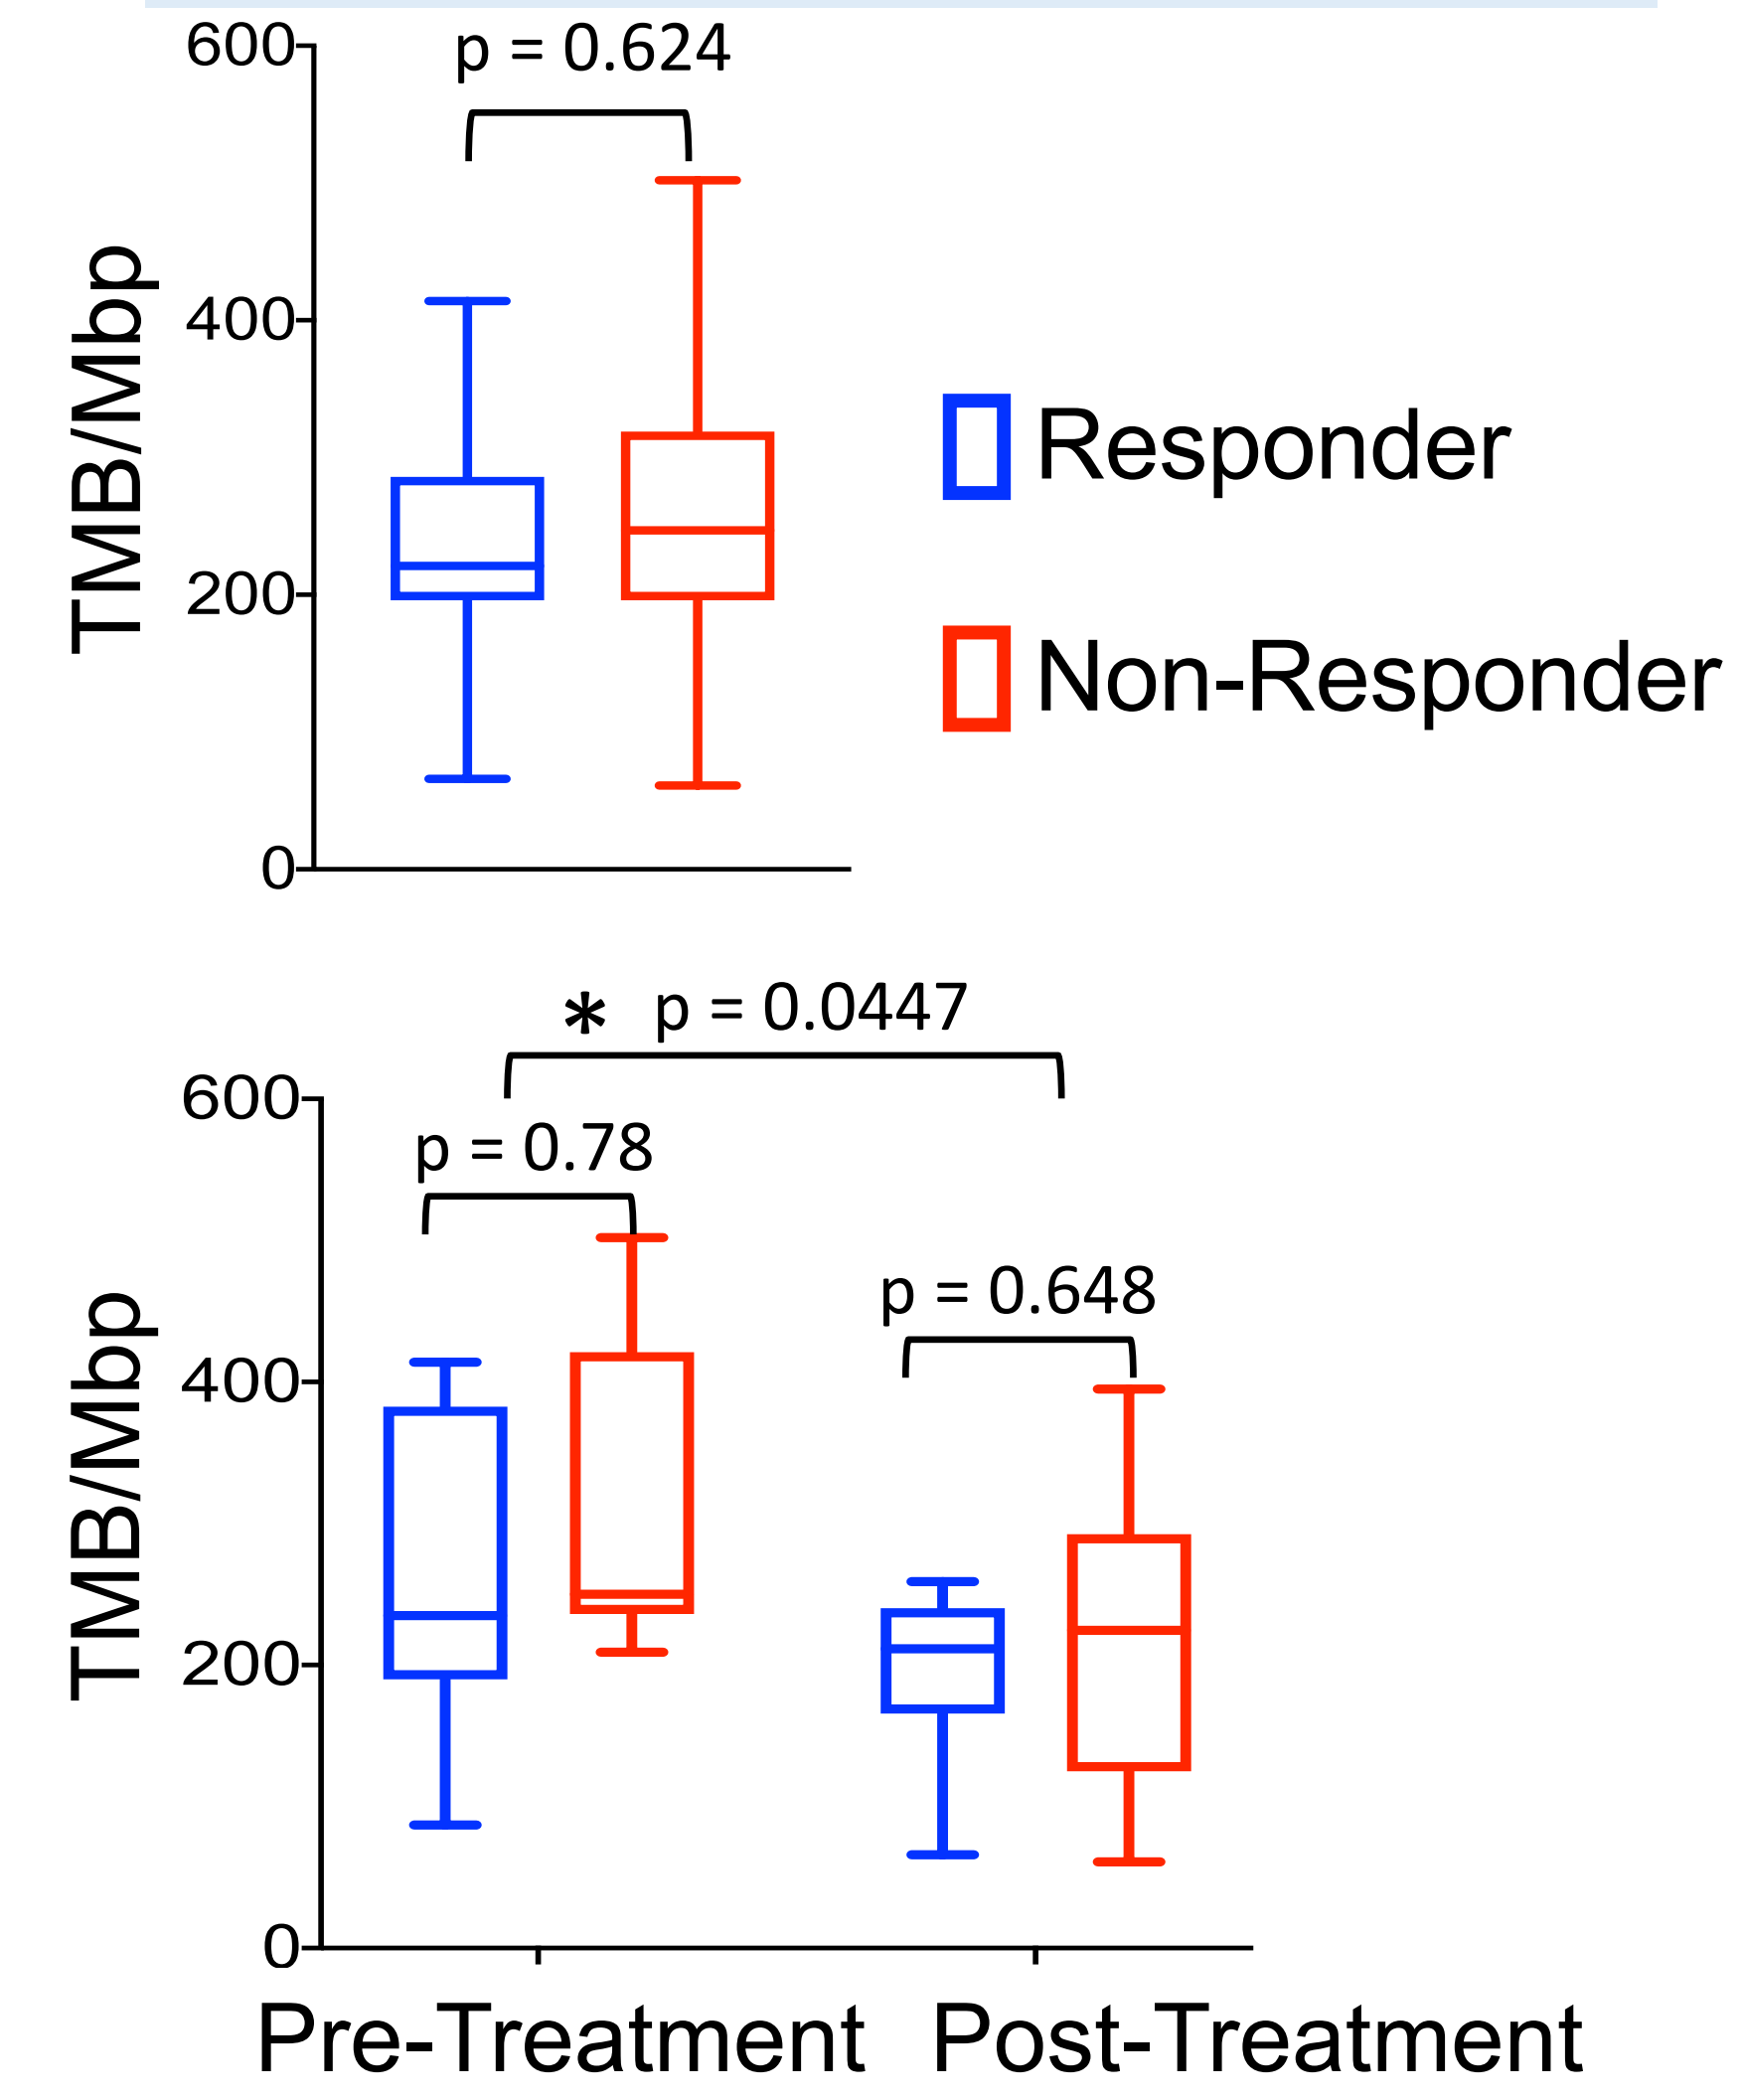

J.

Response Prediction with TMB Score

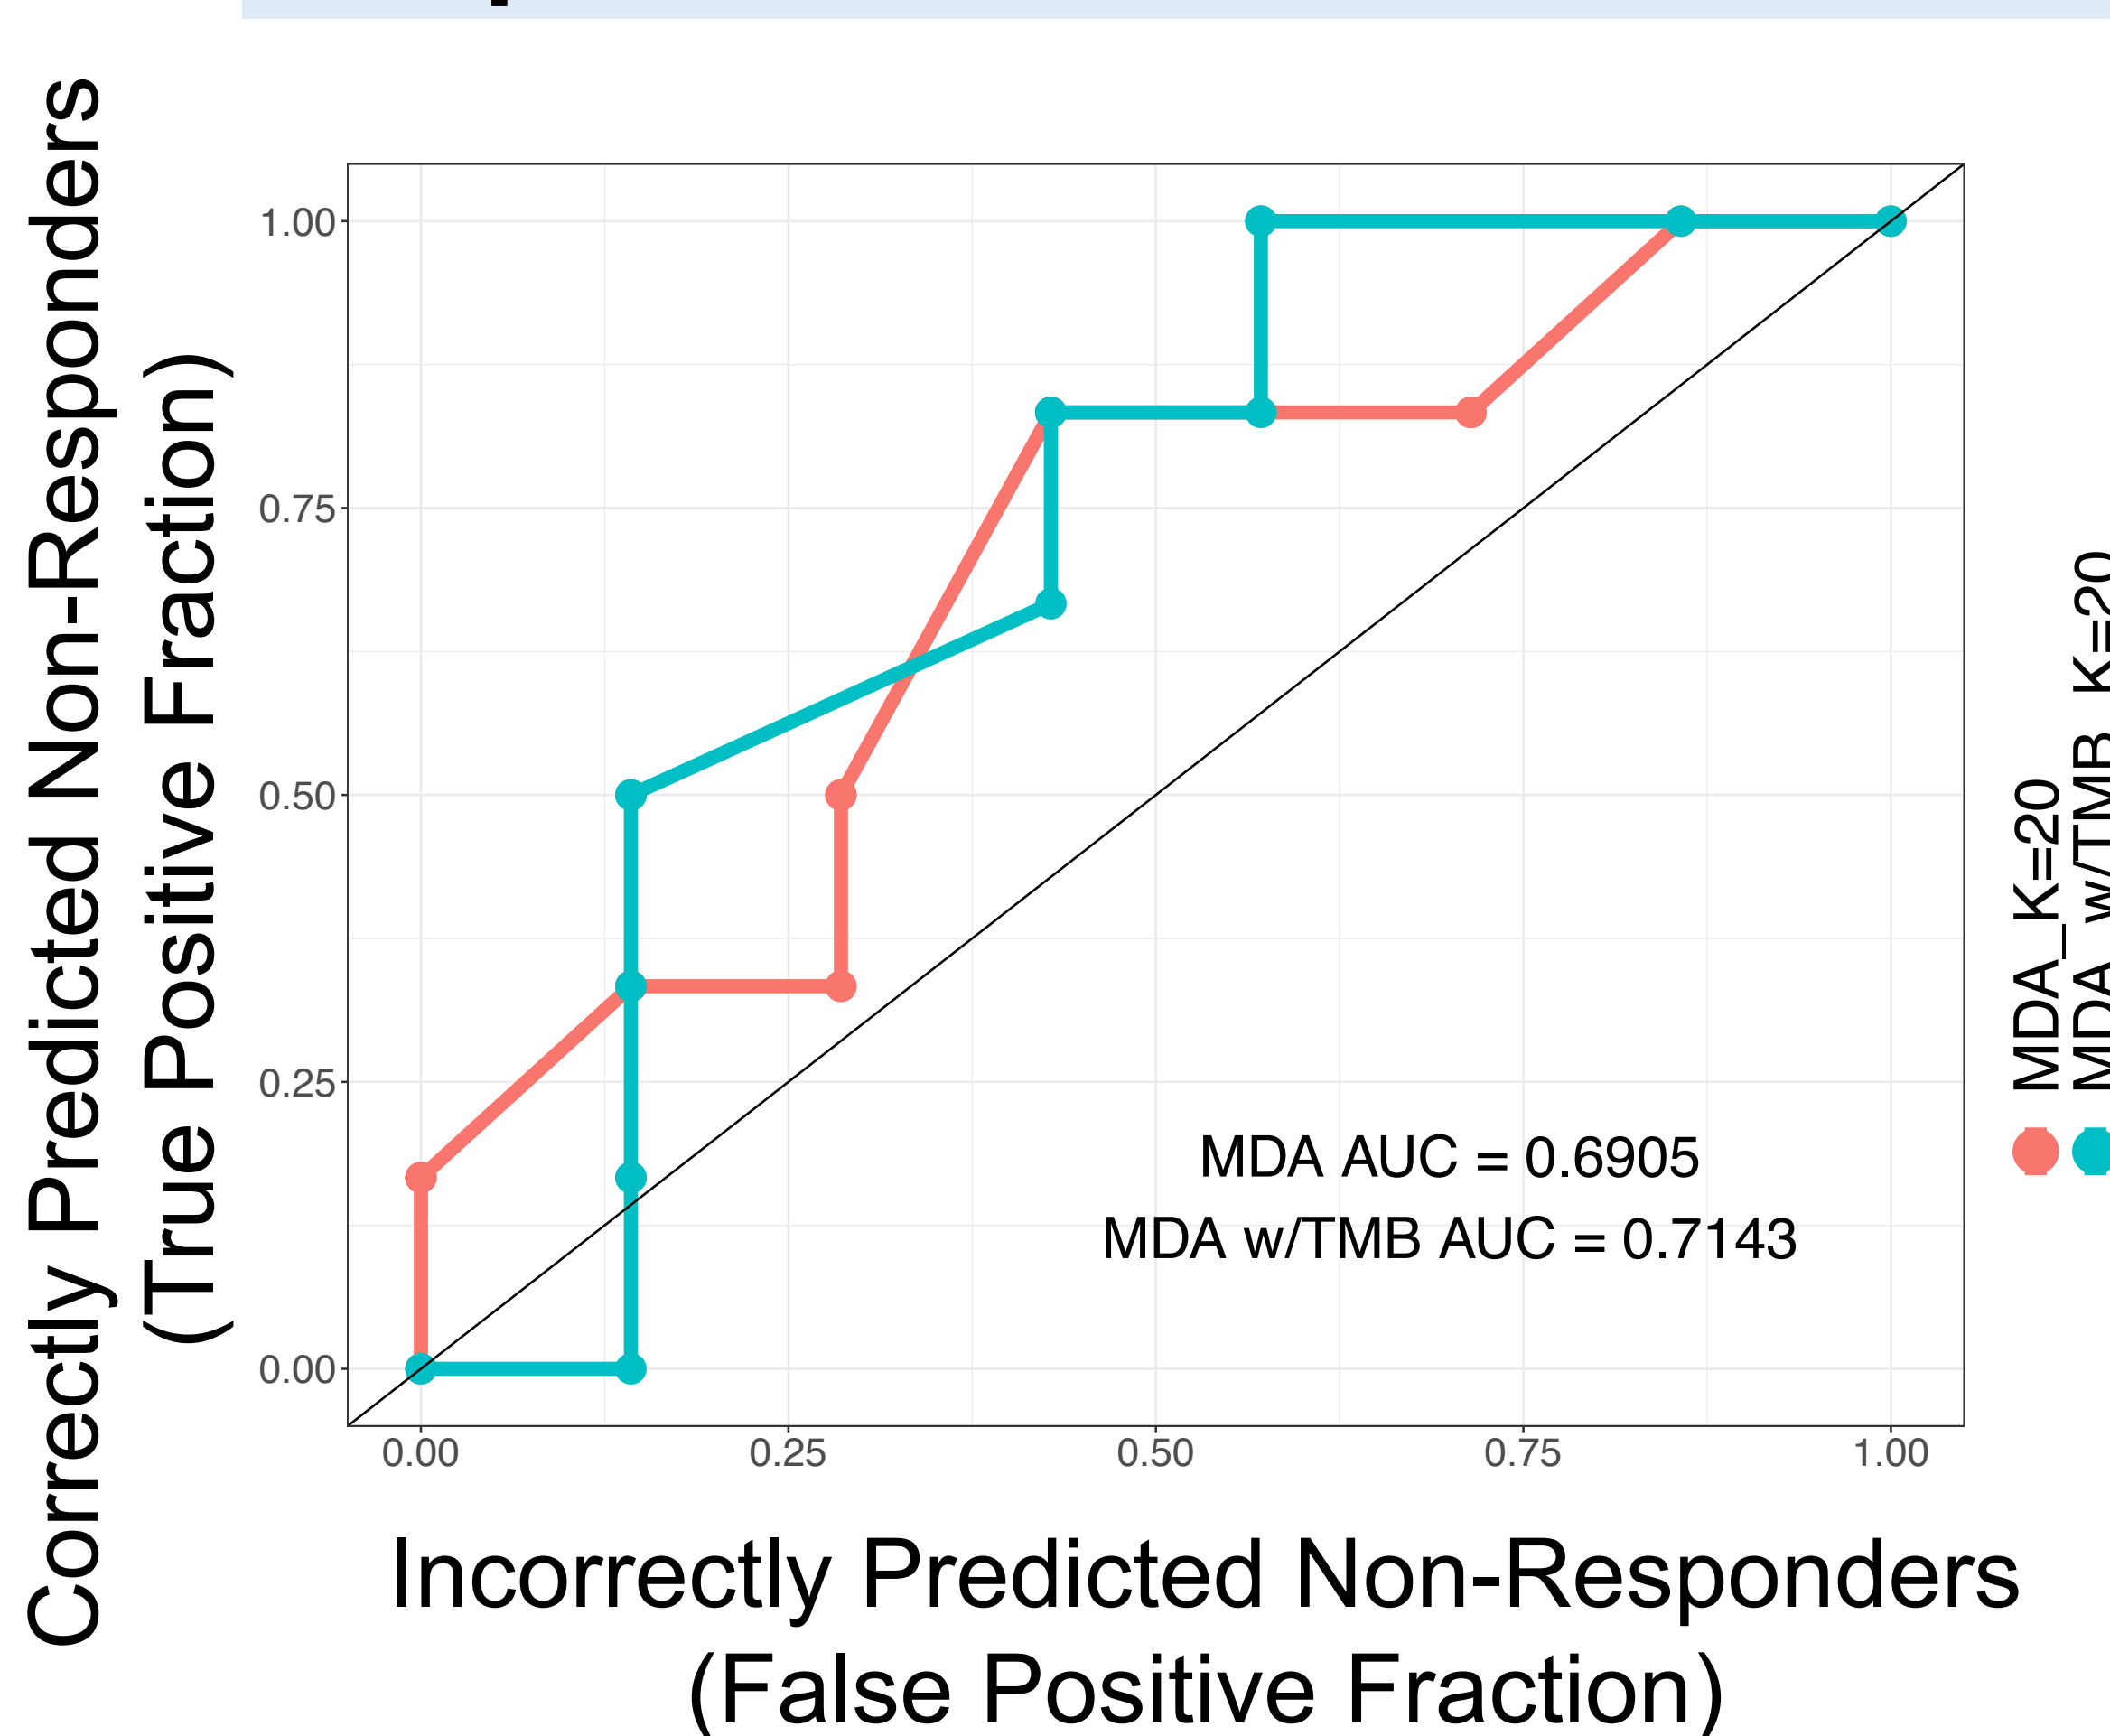

K.

Prediction of Progression-Free Survival using Peaks with Better Prognosis

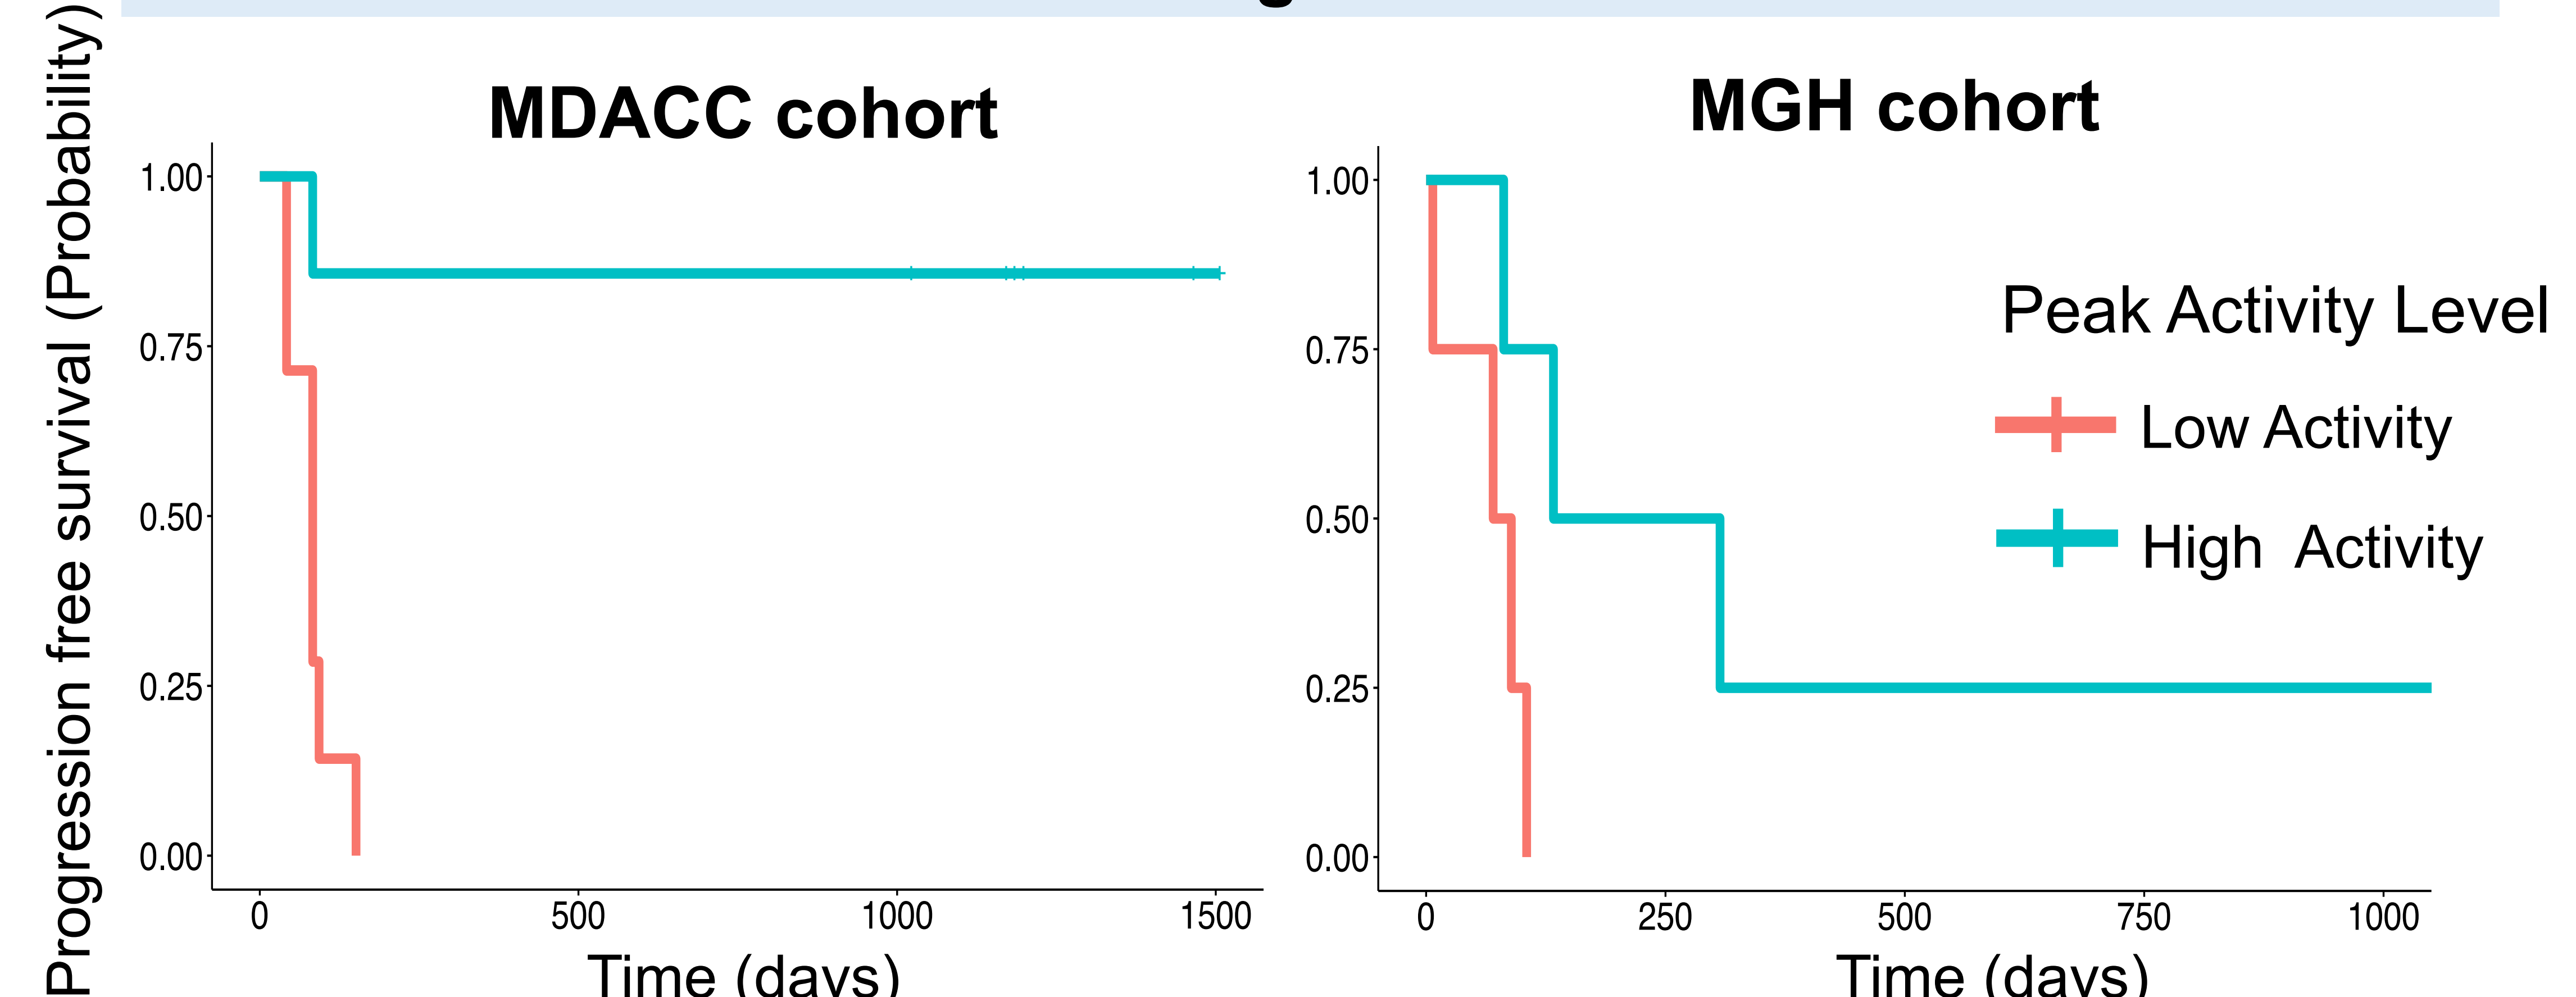

**A.** Known Regulators of anti-tumor Immune Response

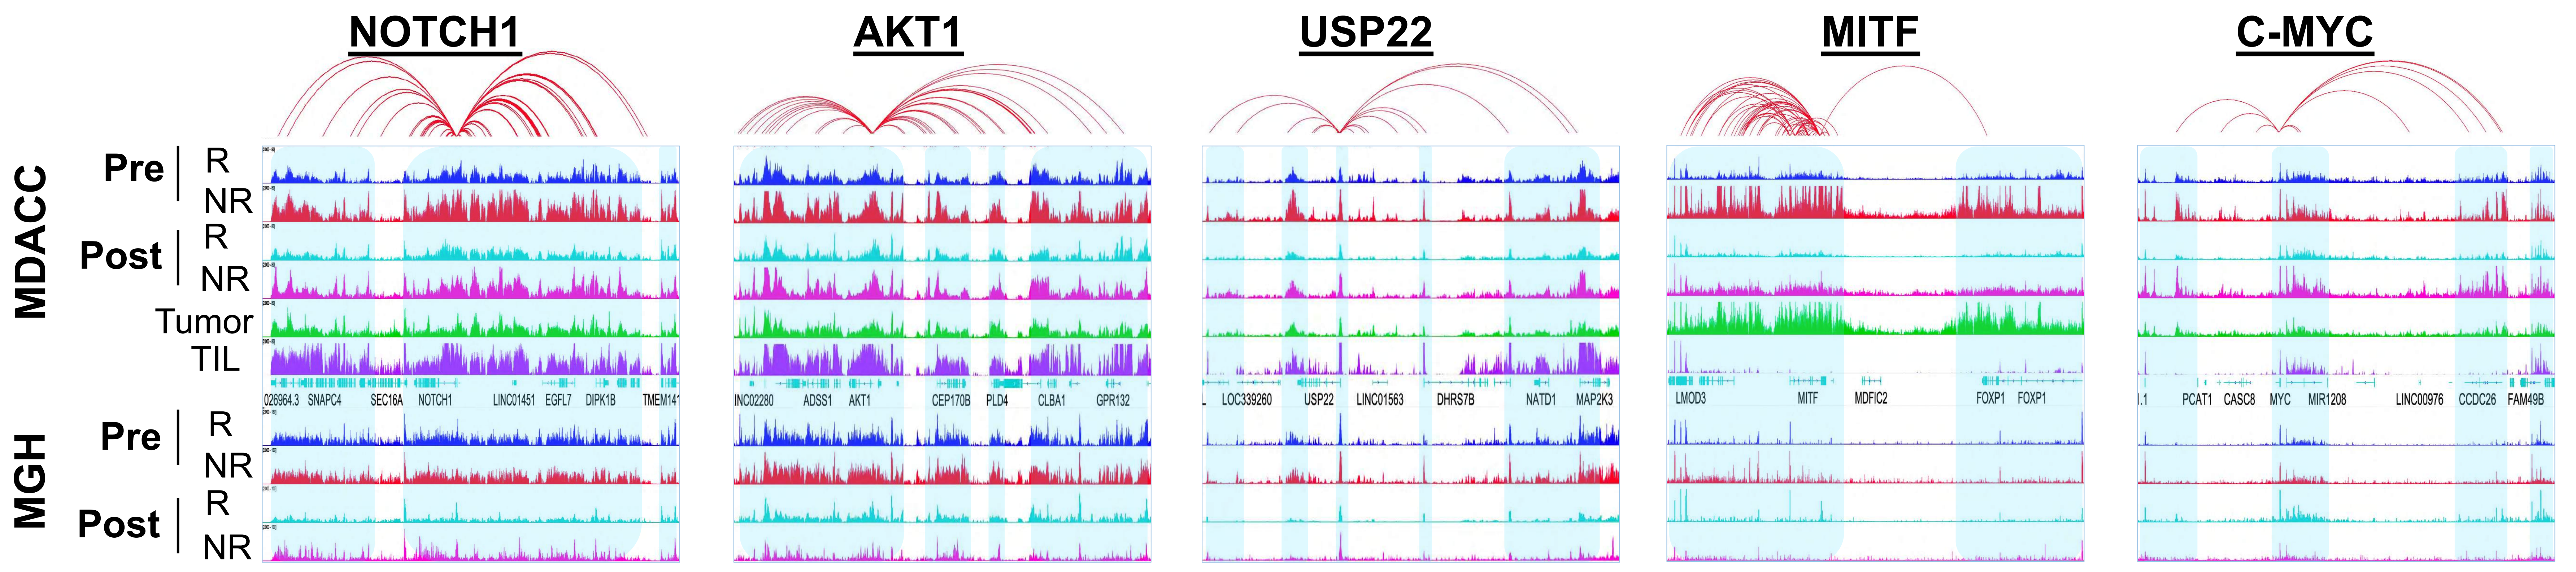

**B.** CXCL genes – Strong Predictors of Response

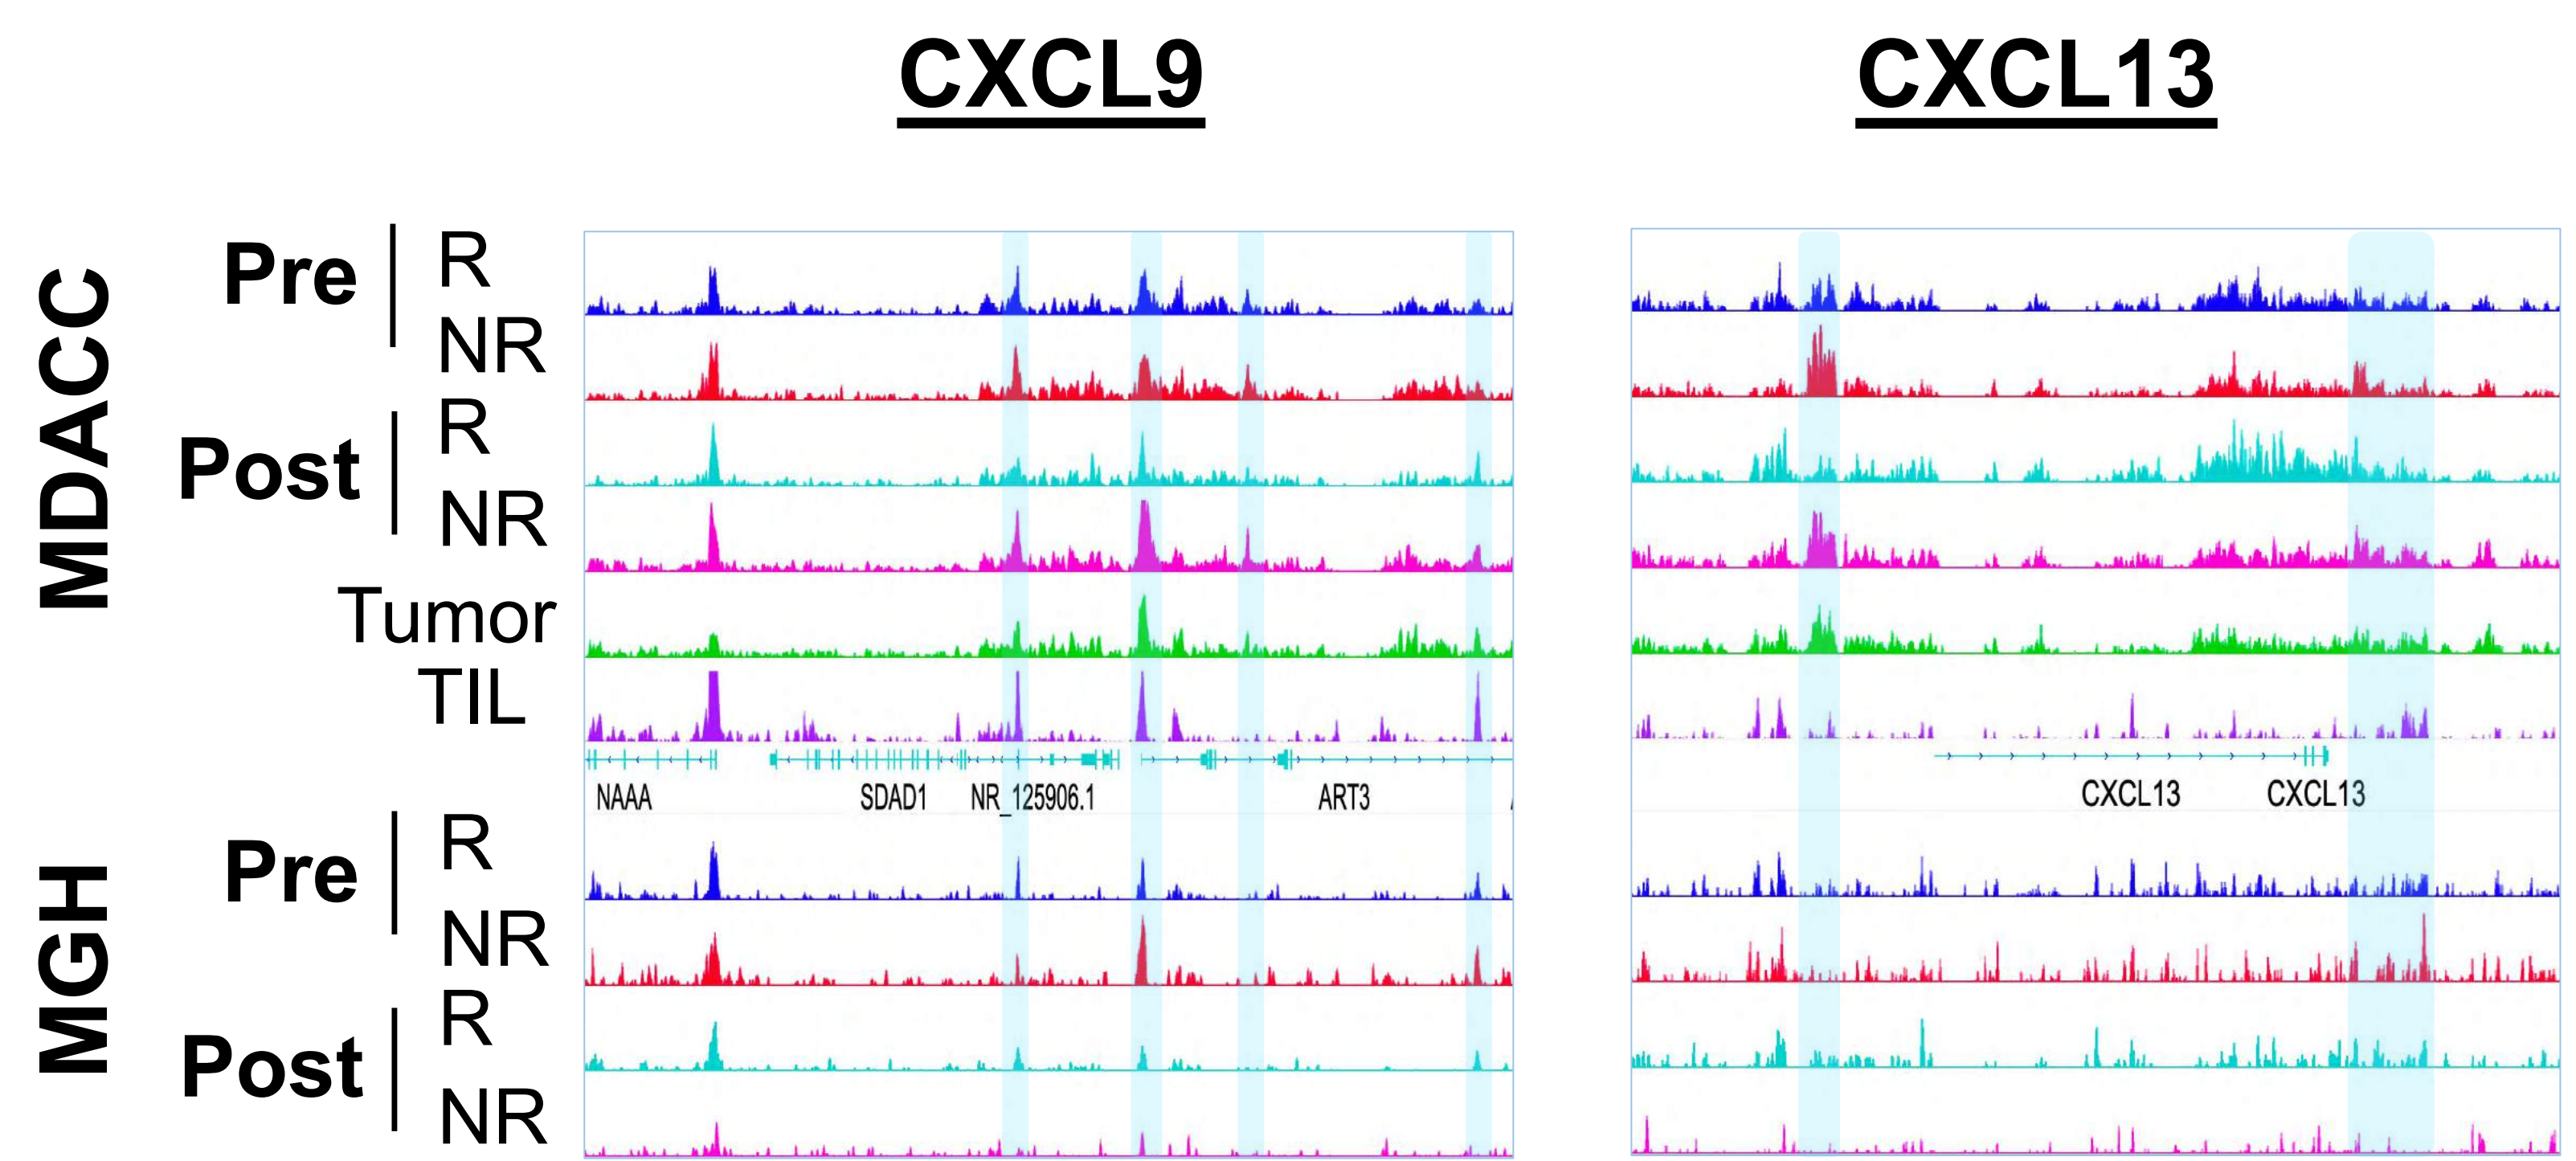

**C.** TGFβ Pathway

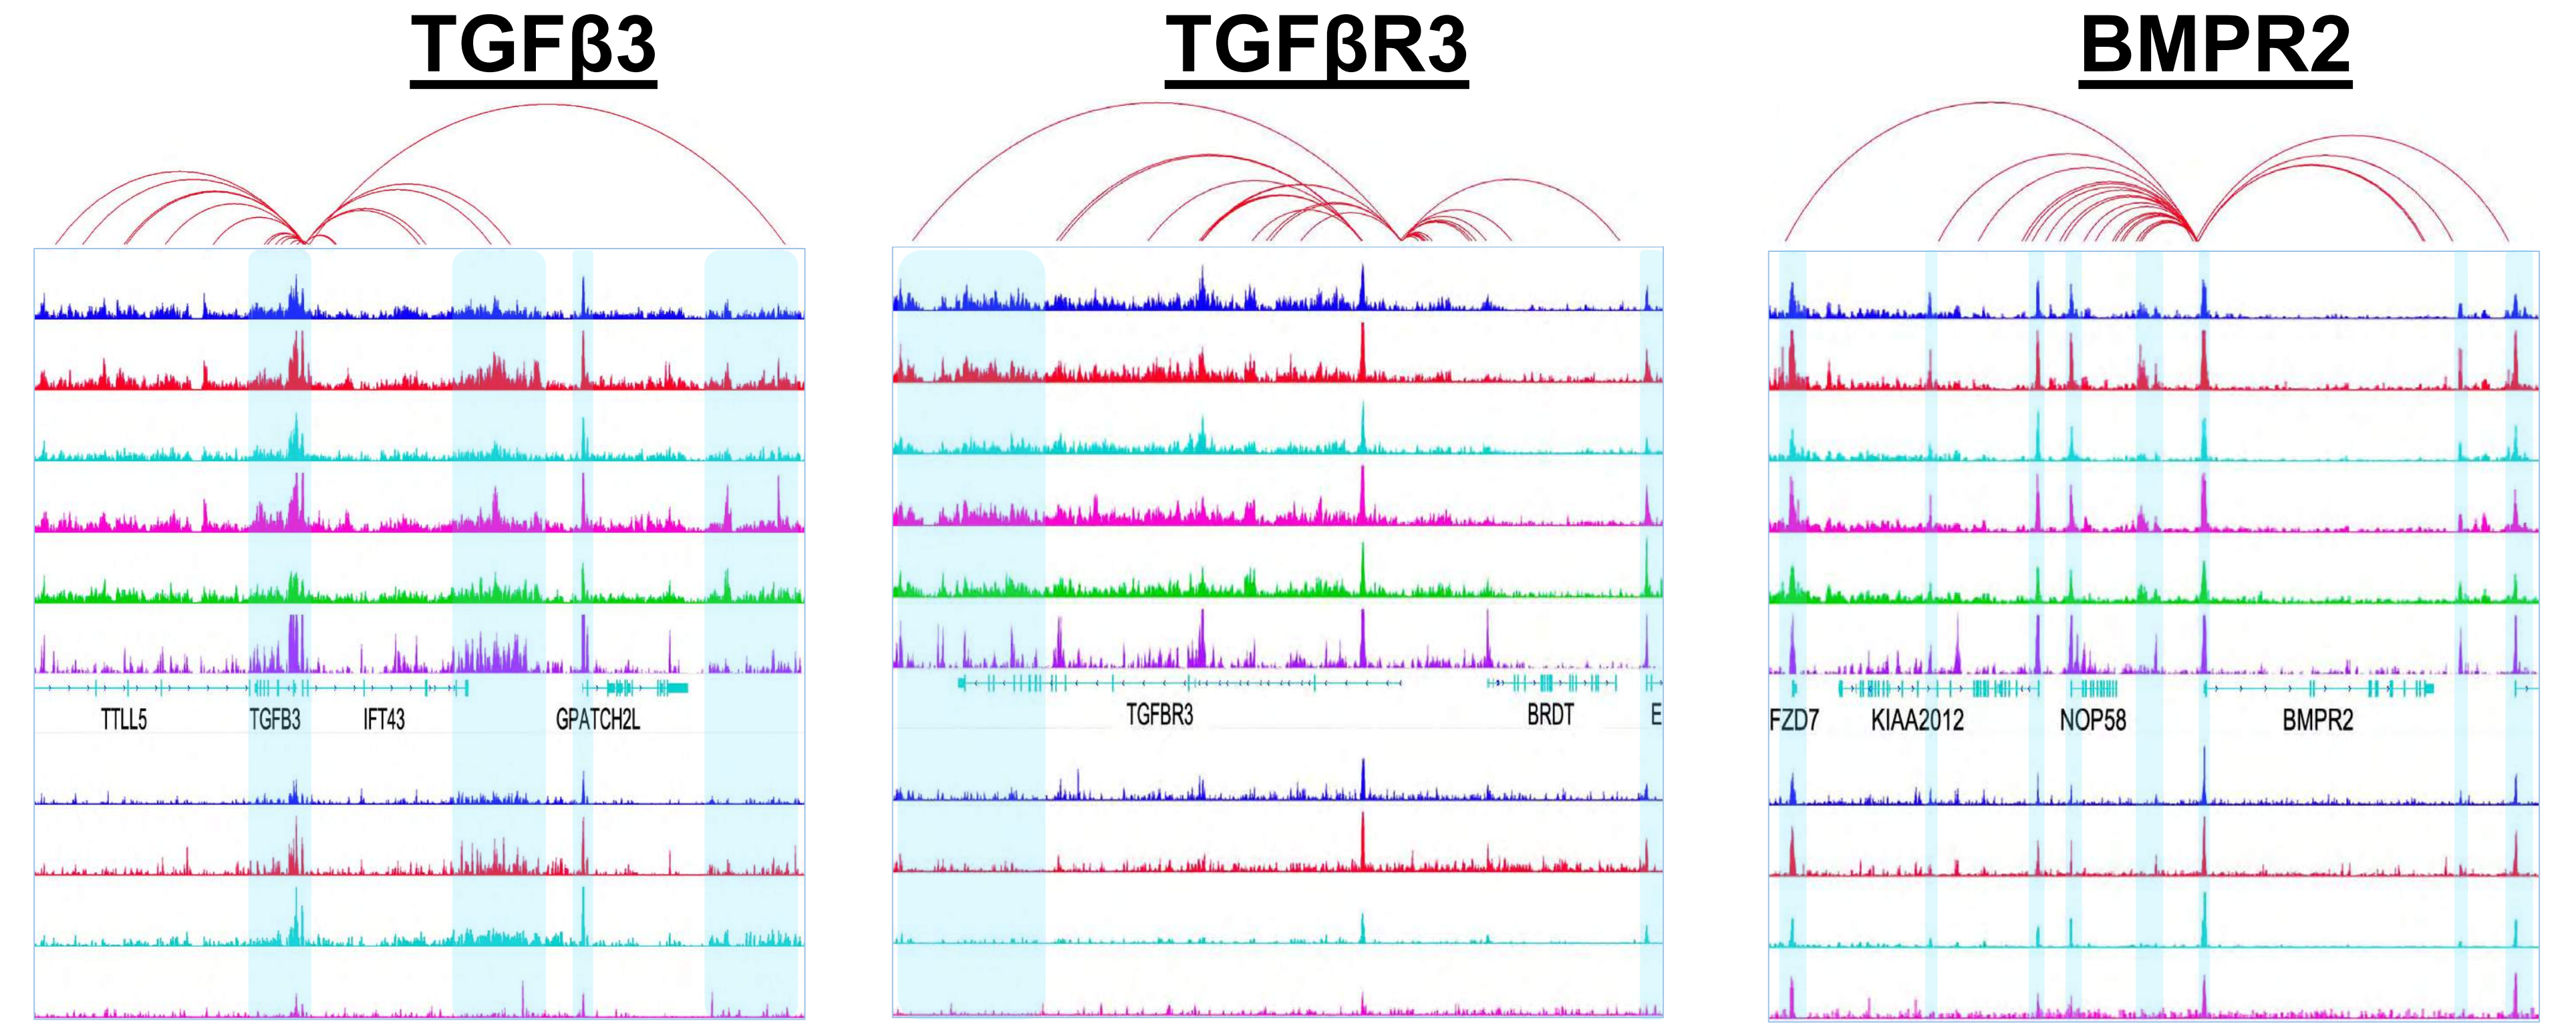

**D.** PI3K and Angiogenesis Pathway

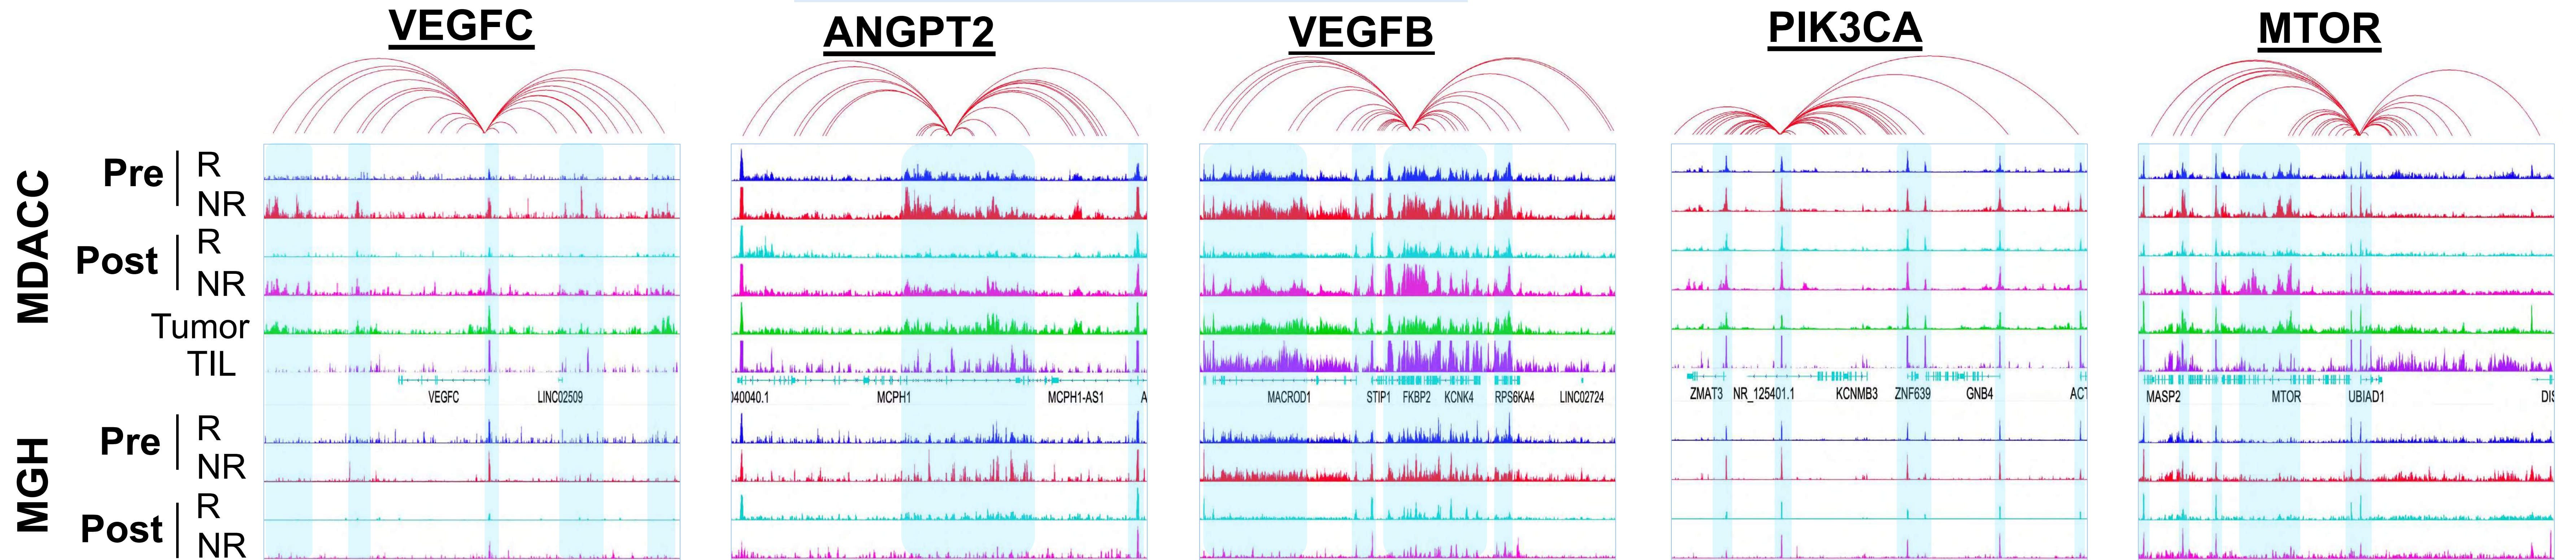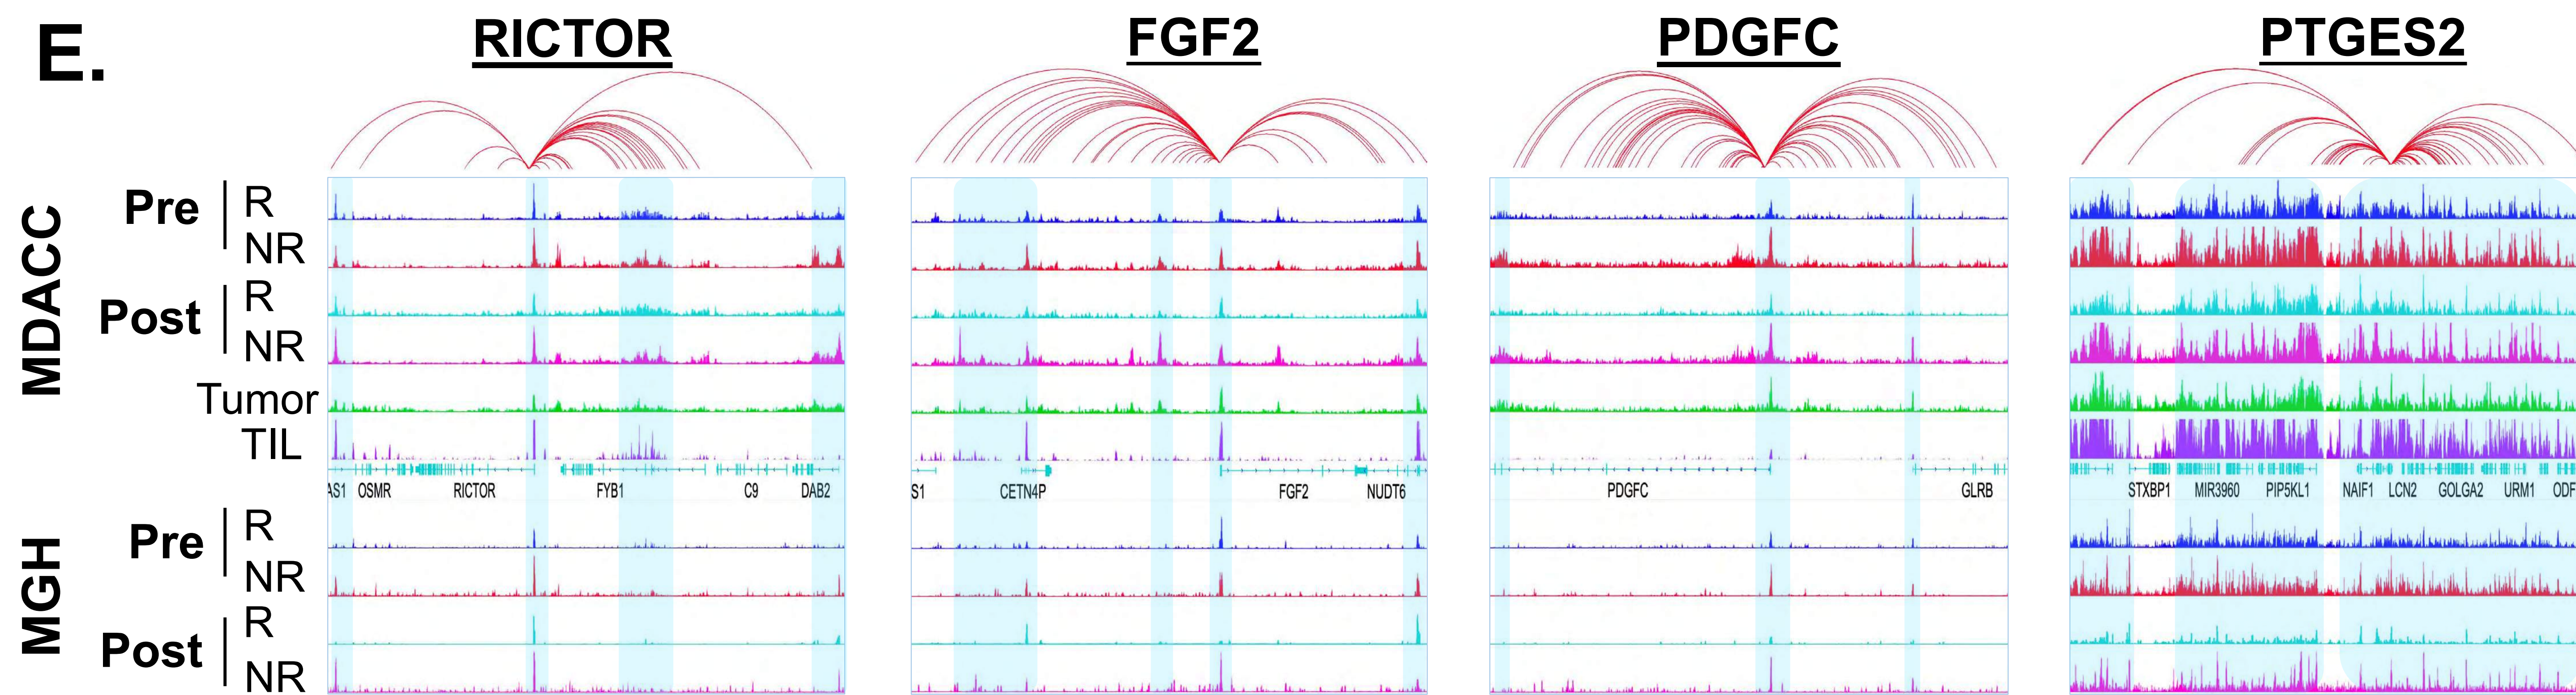

**F.** Fig. 3C Genes in MGH Cohort

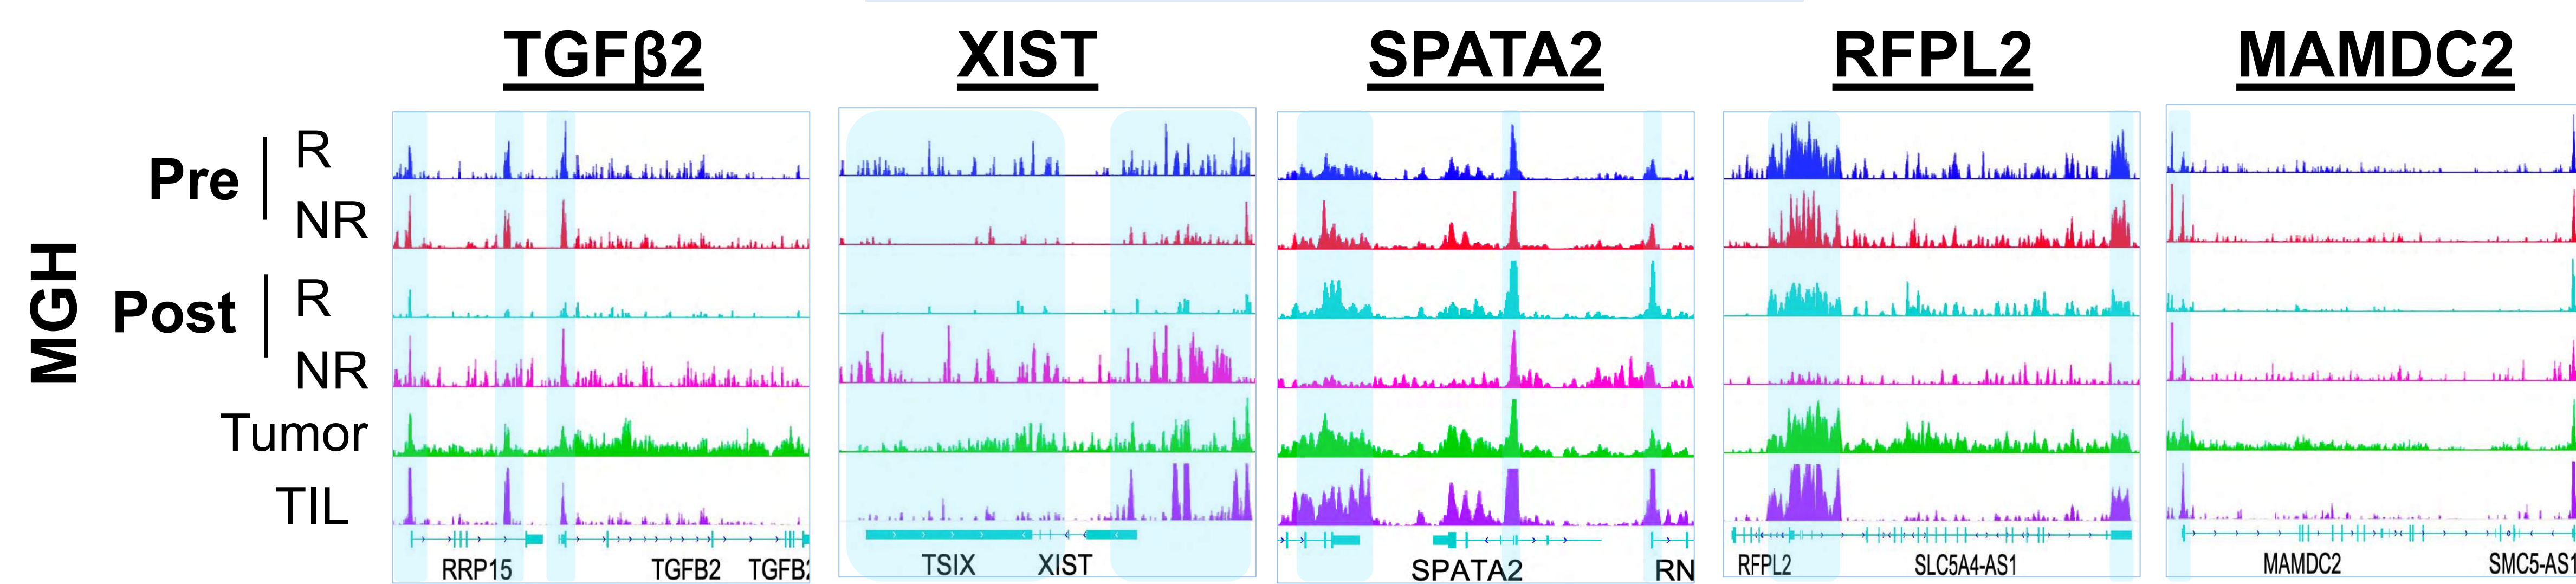

**G.** Predicted Enhancer-Regulated Genes With Associated Gene Expression

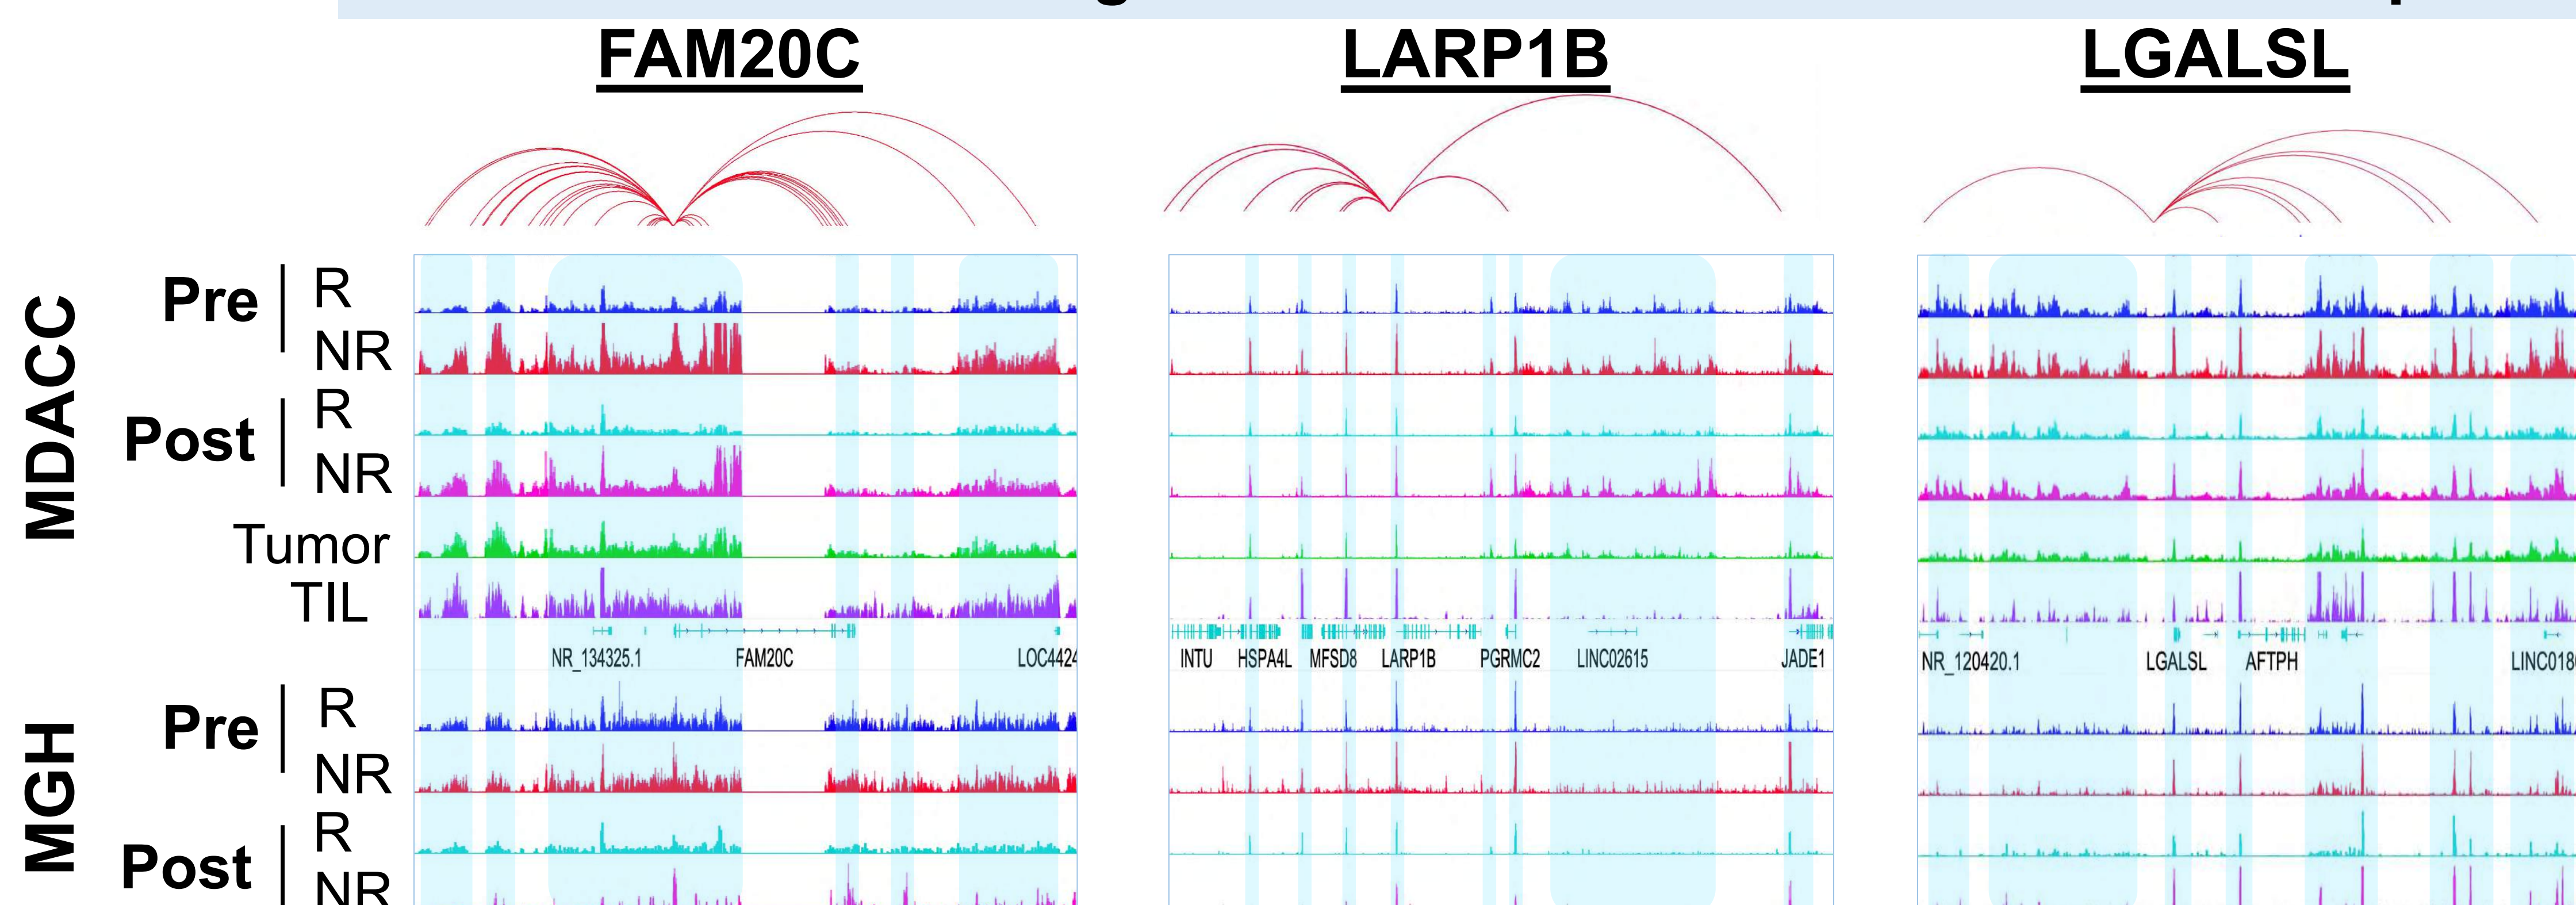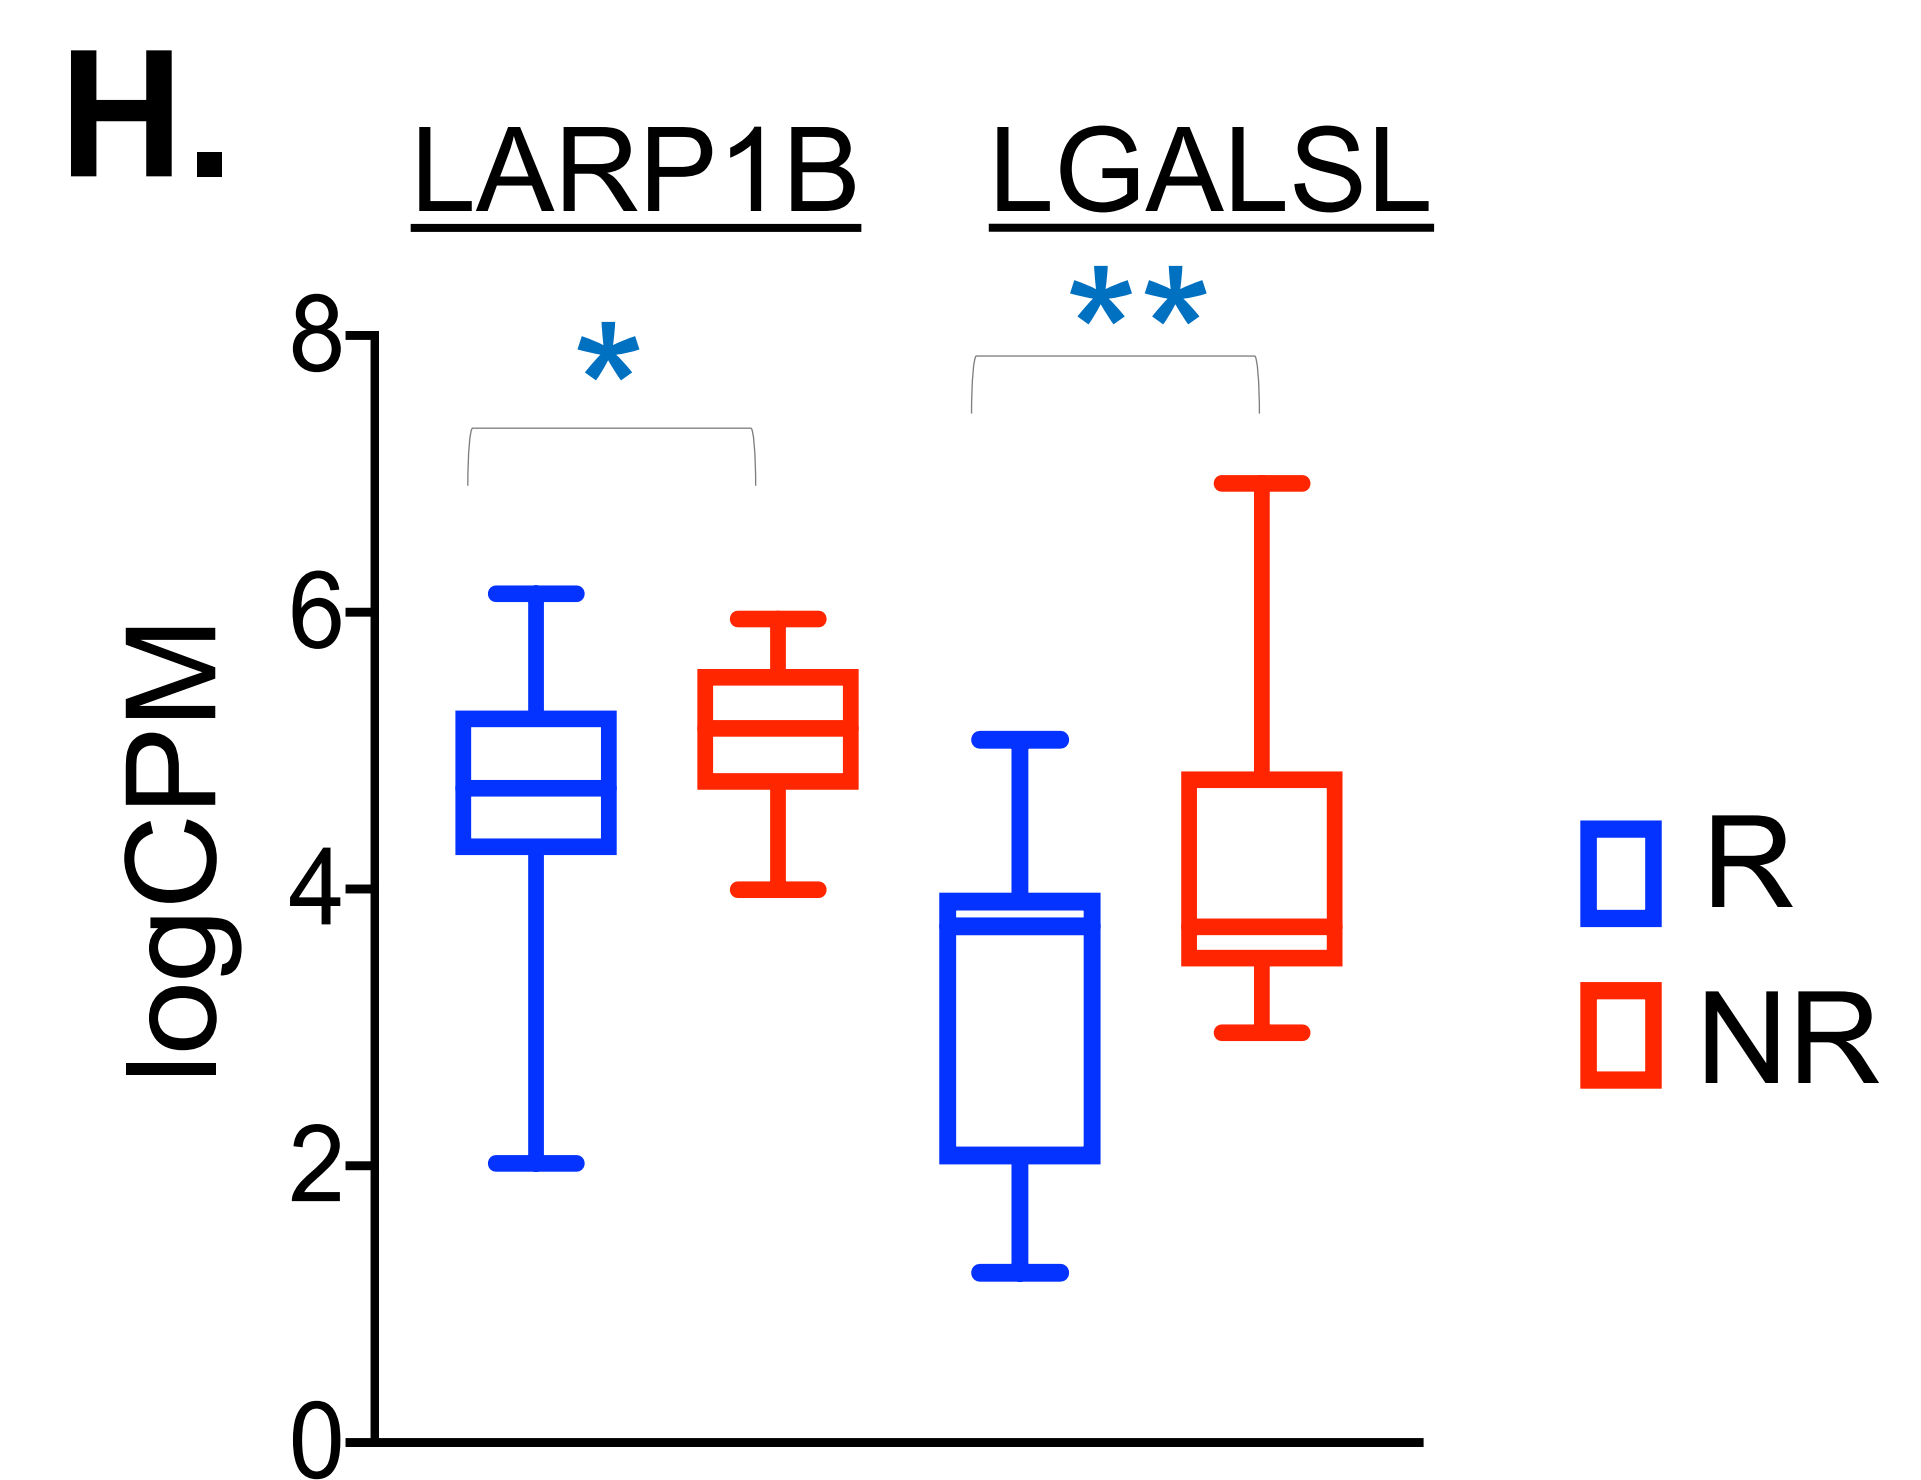

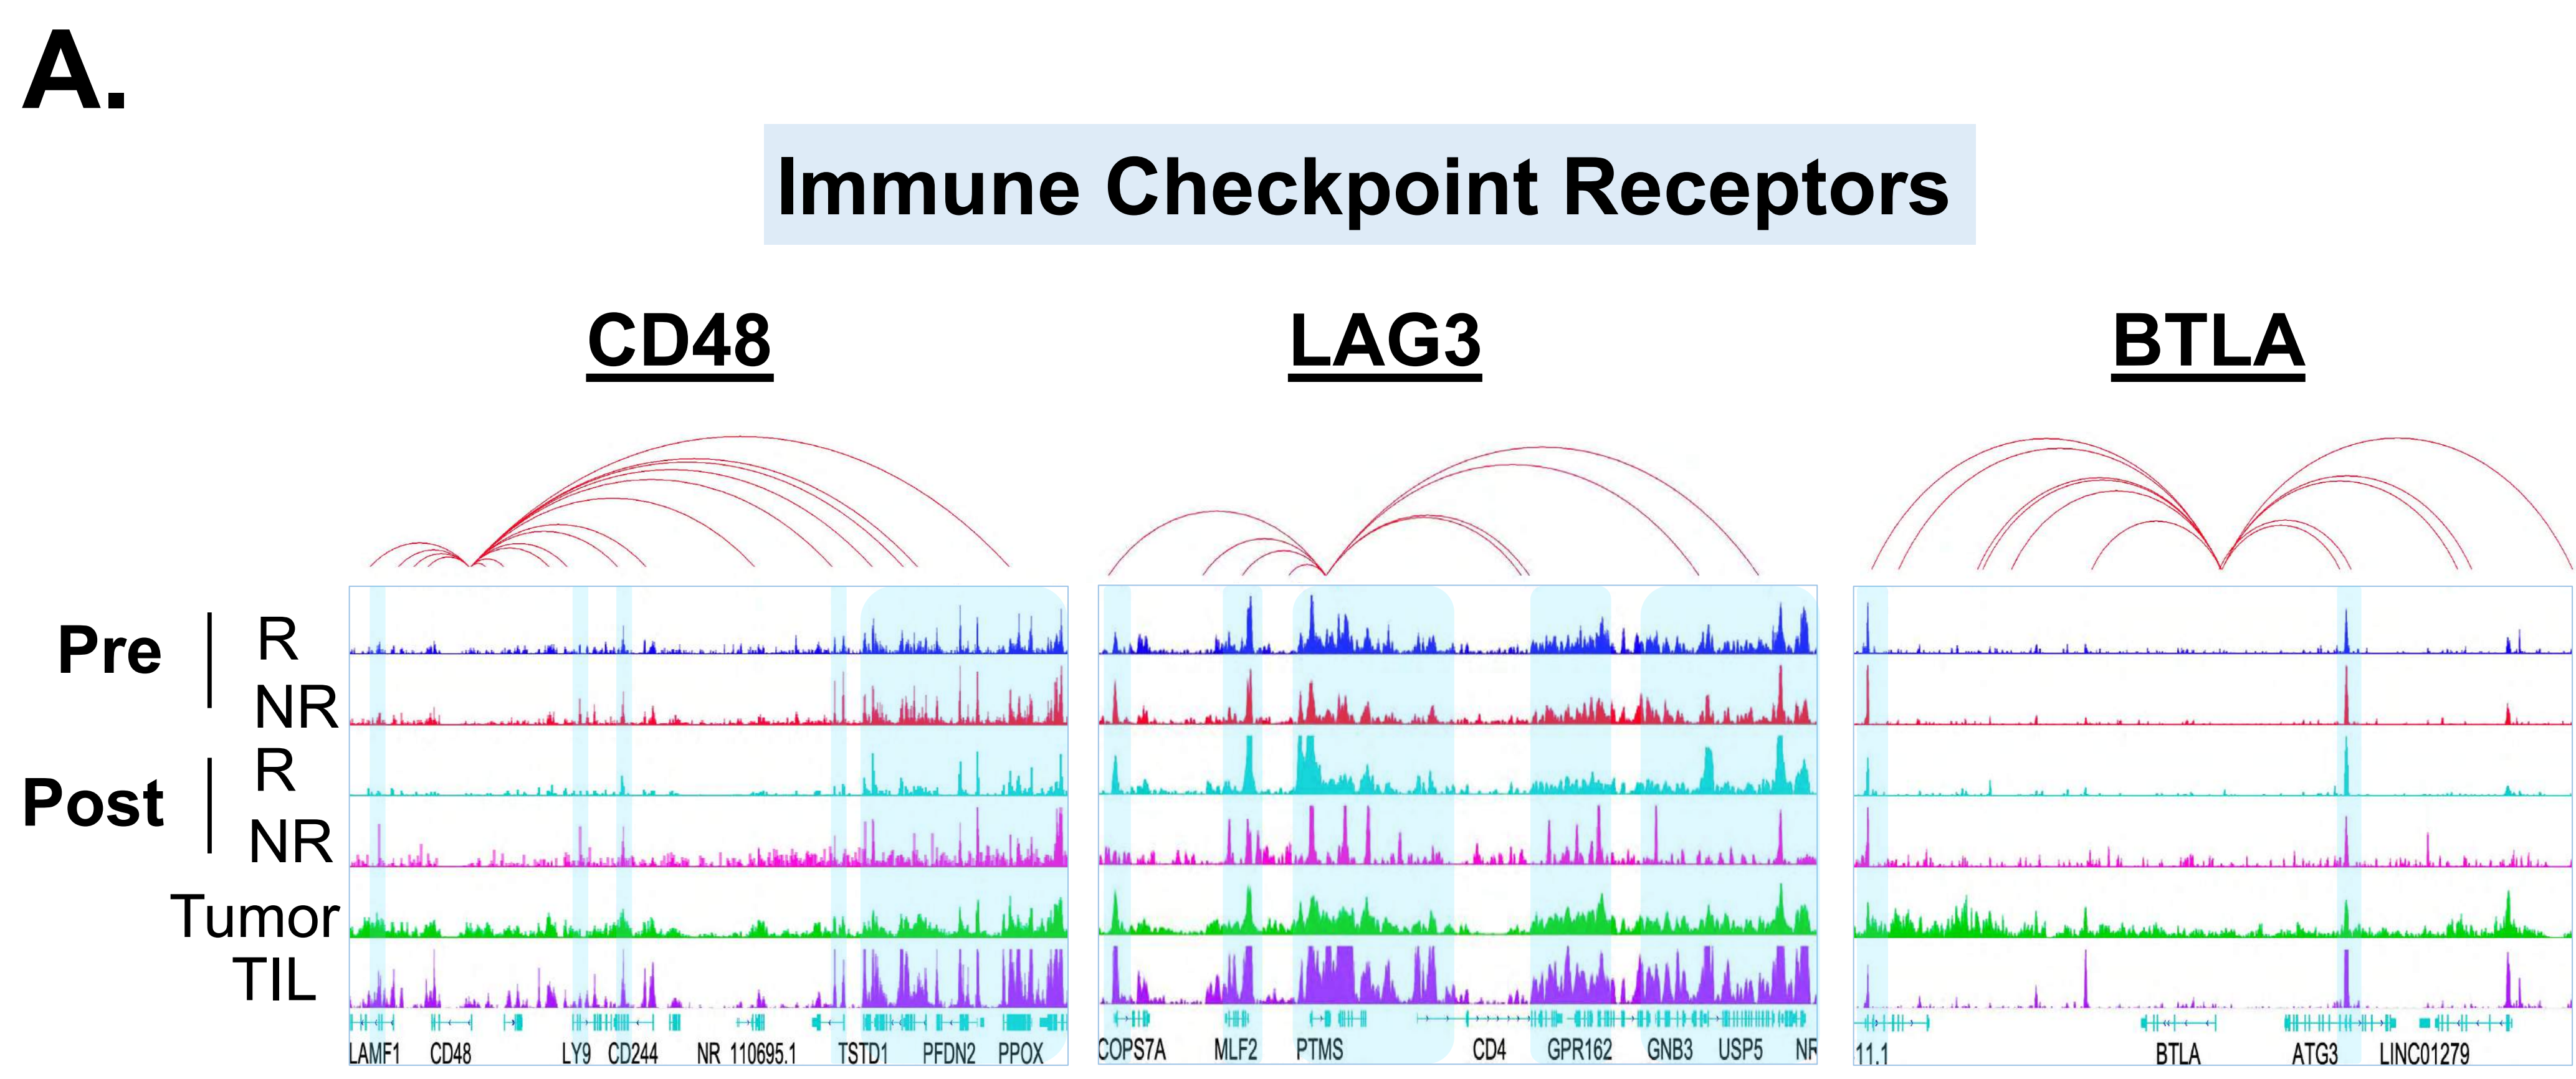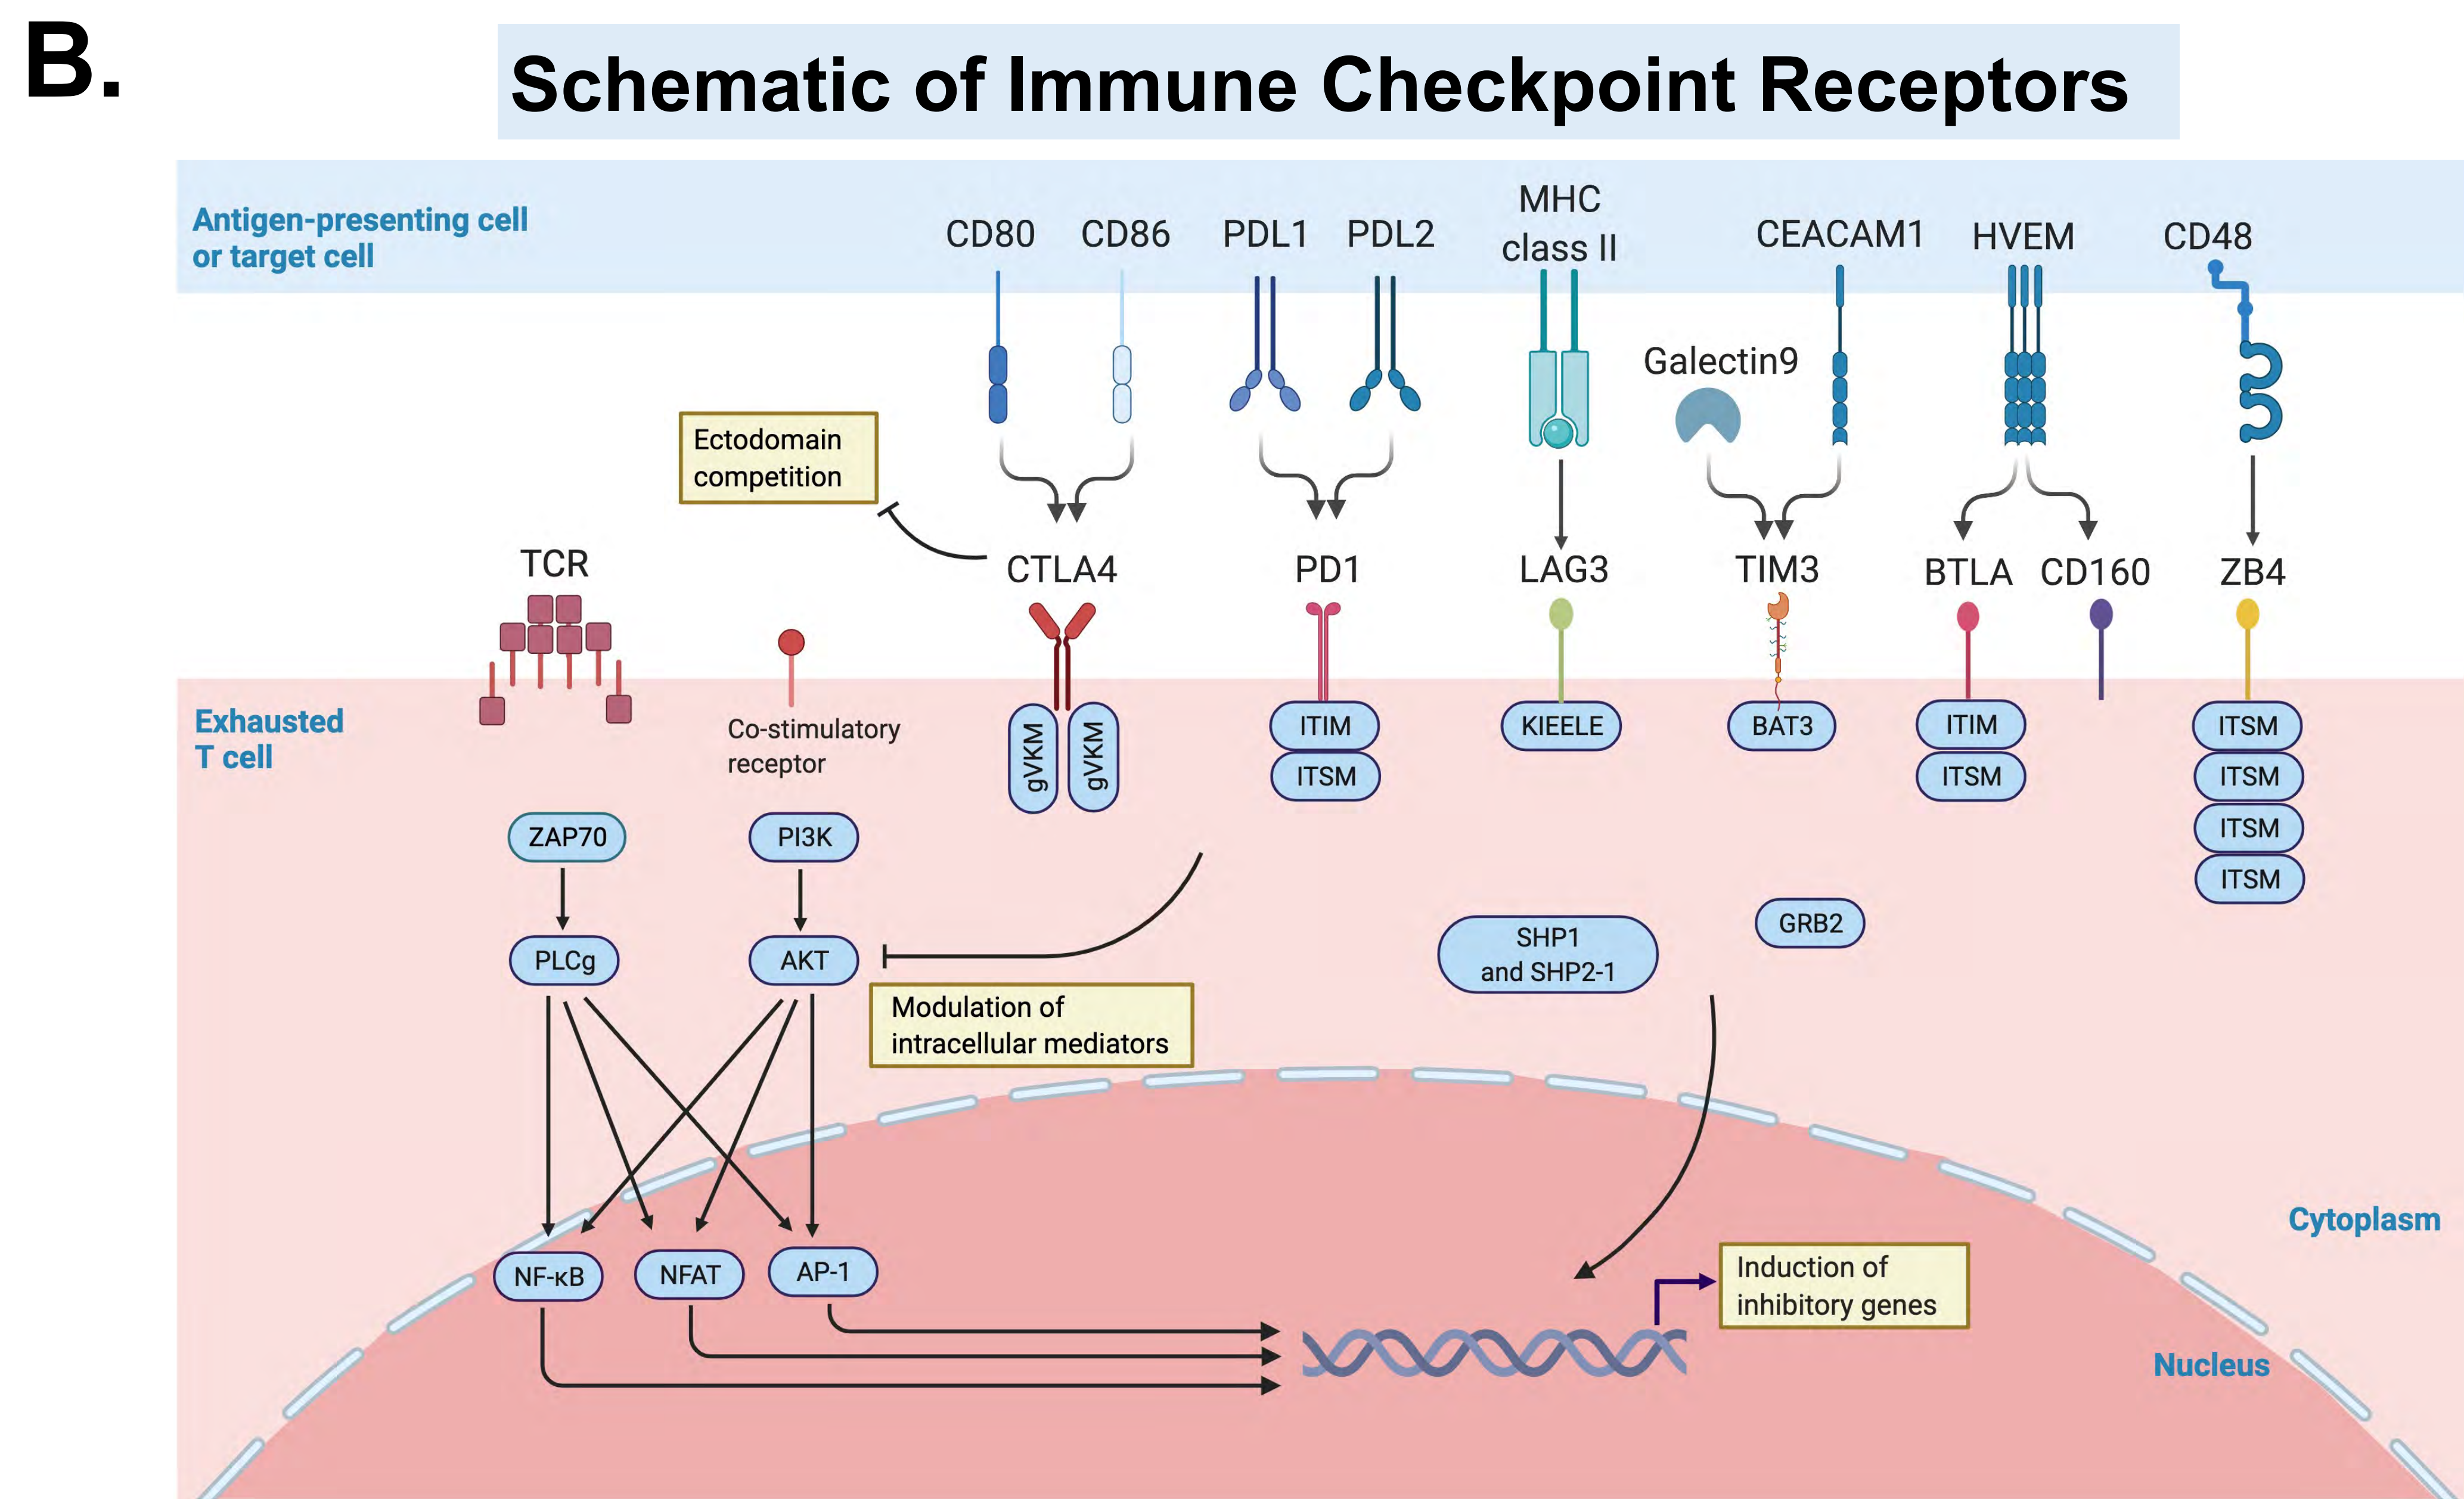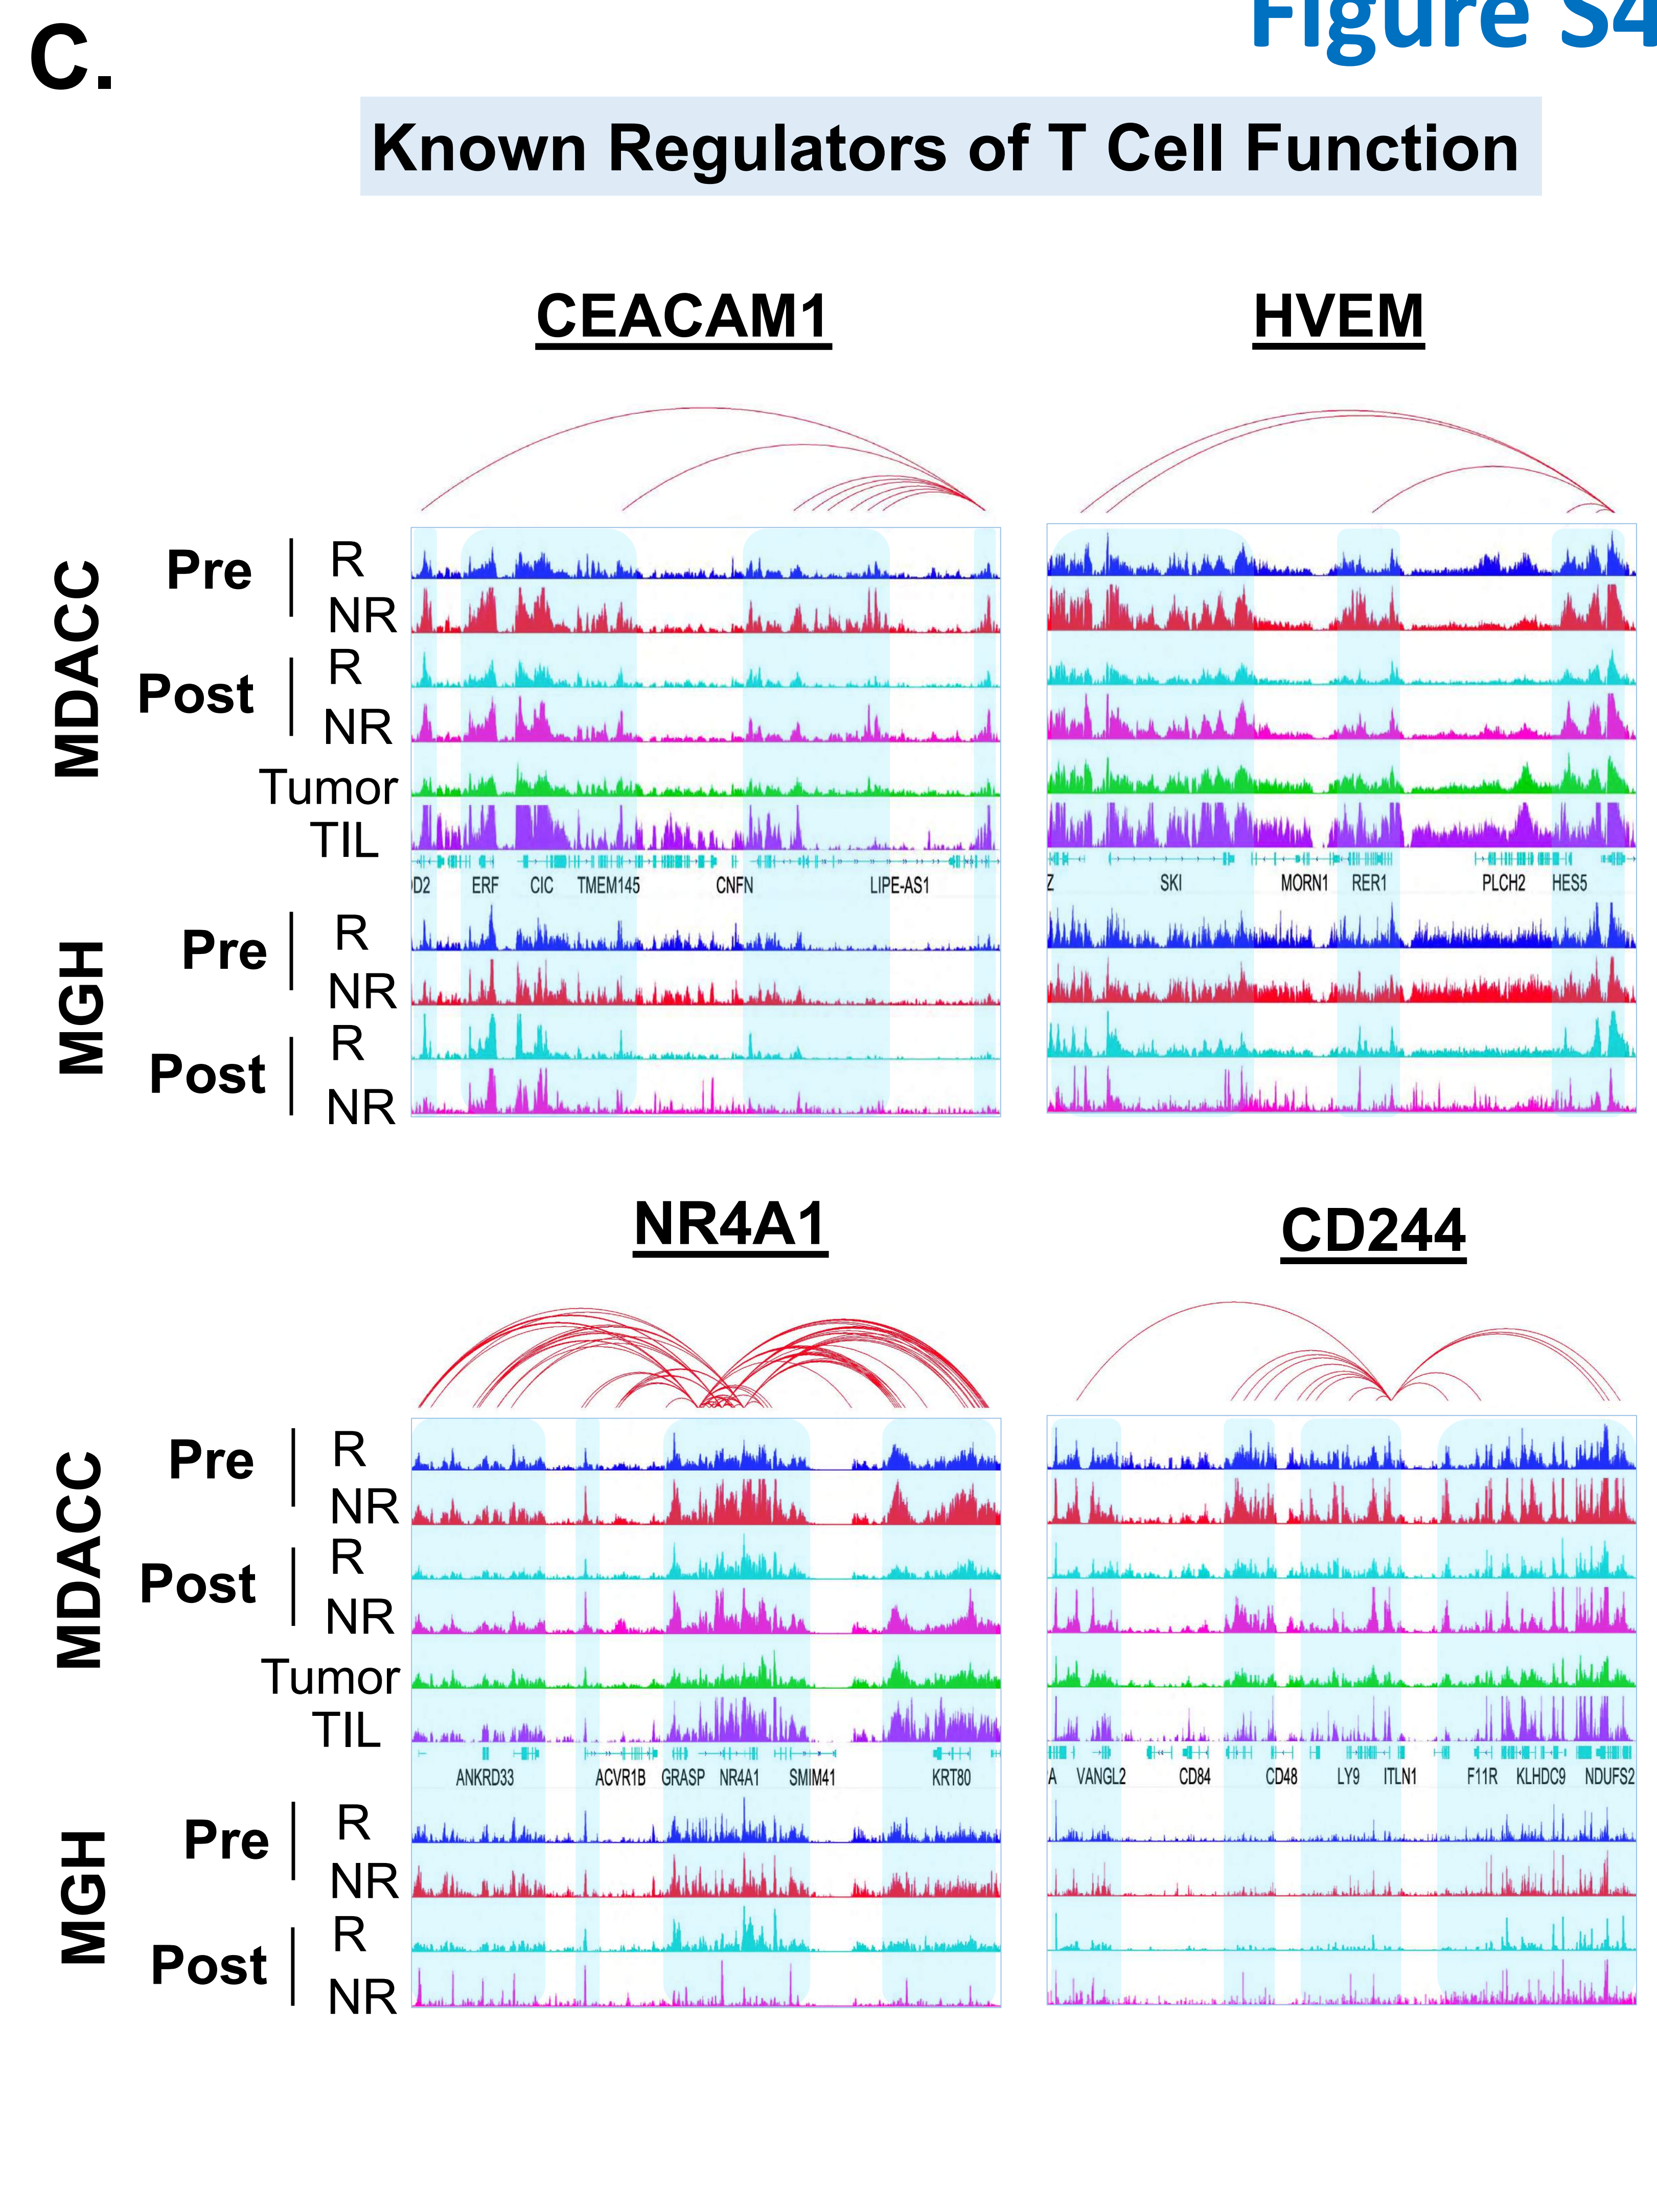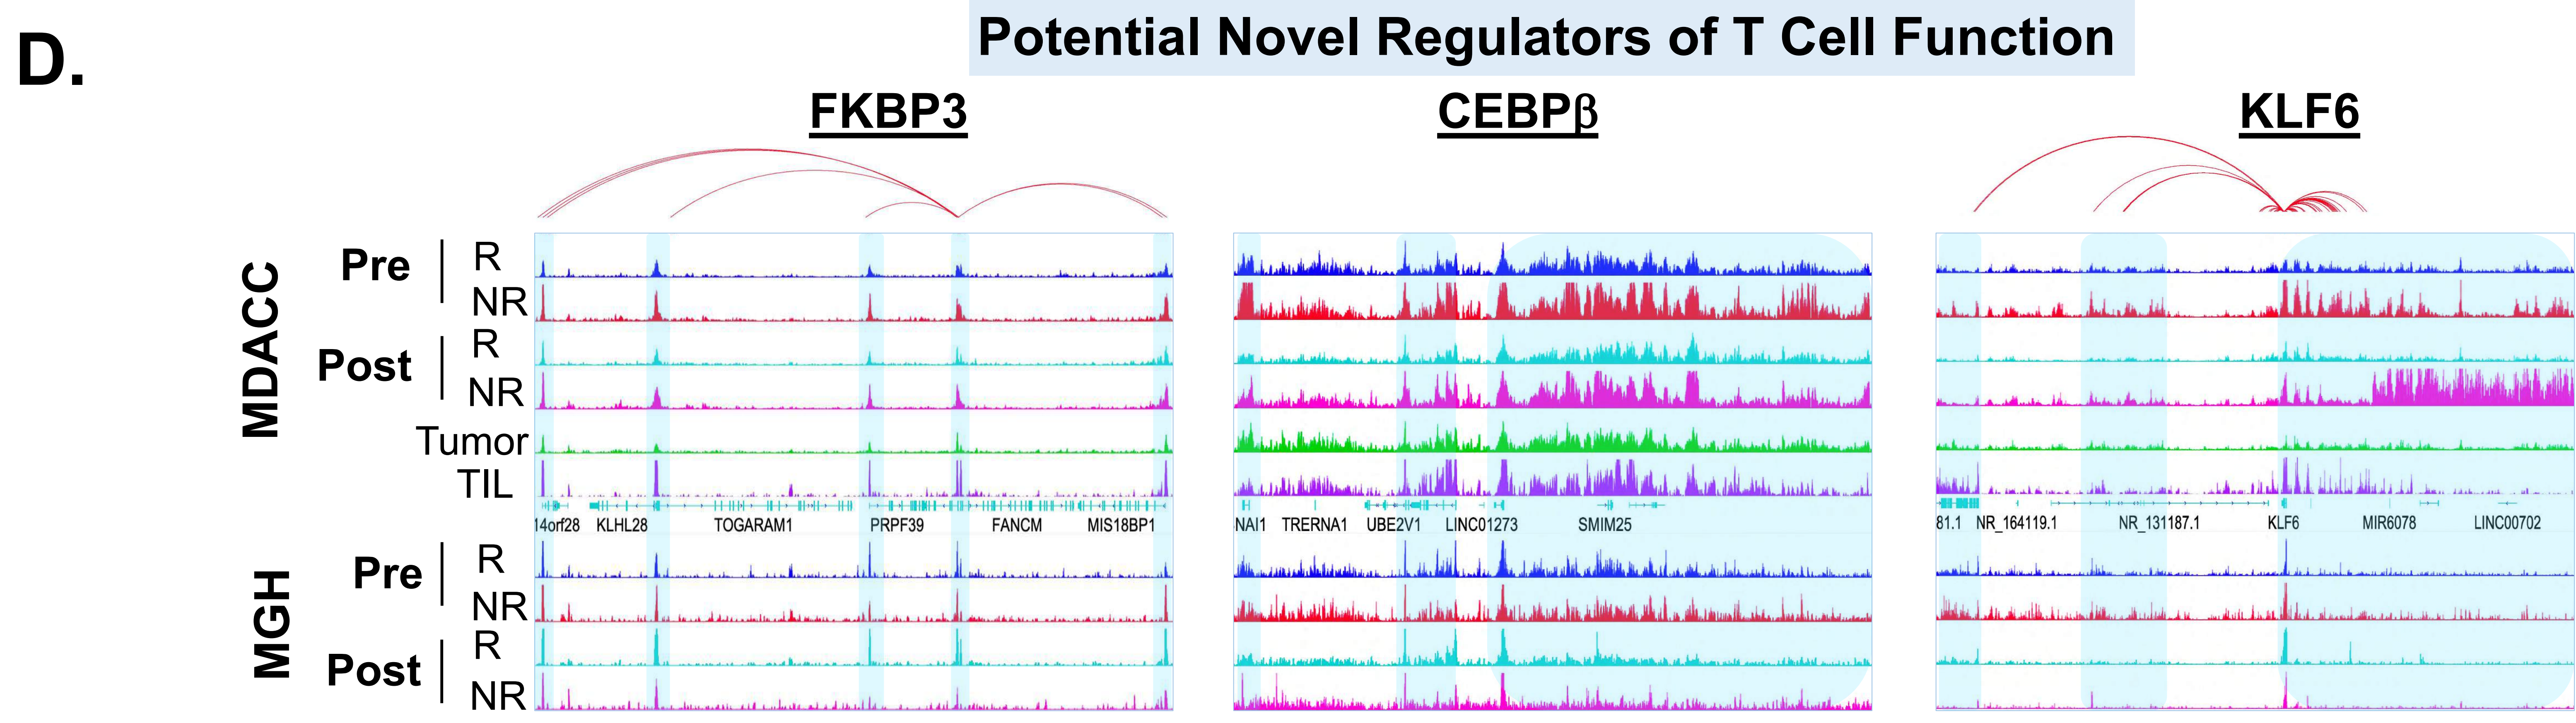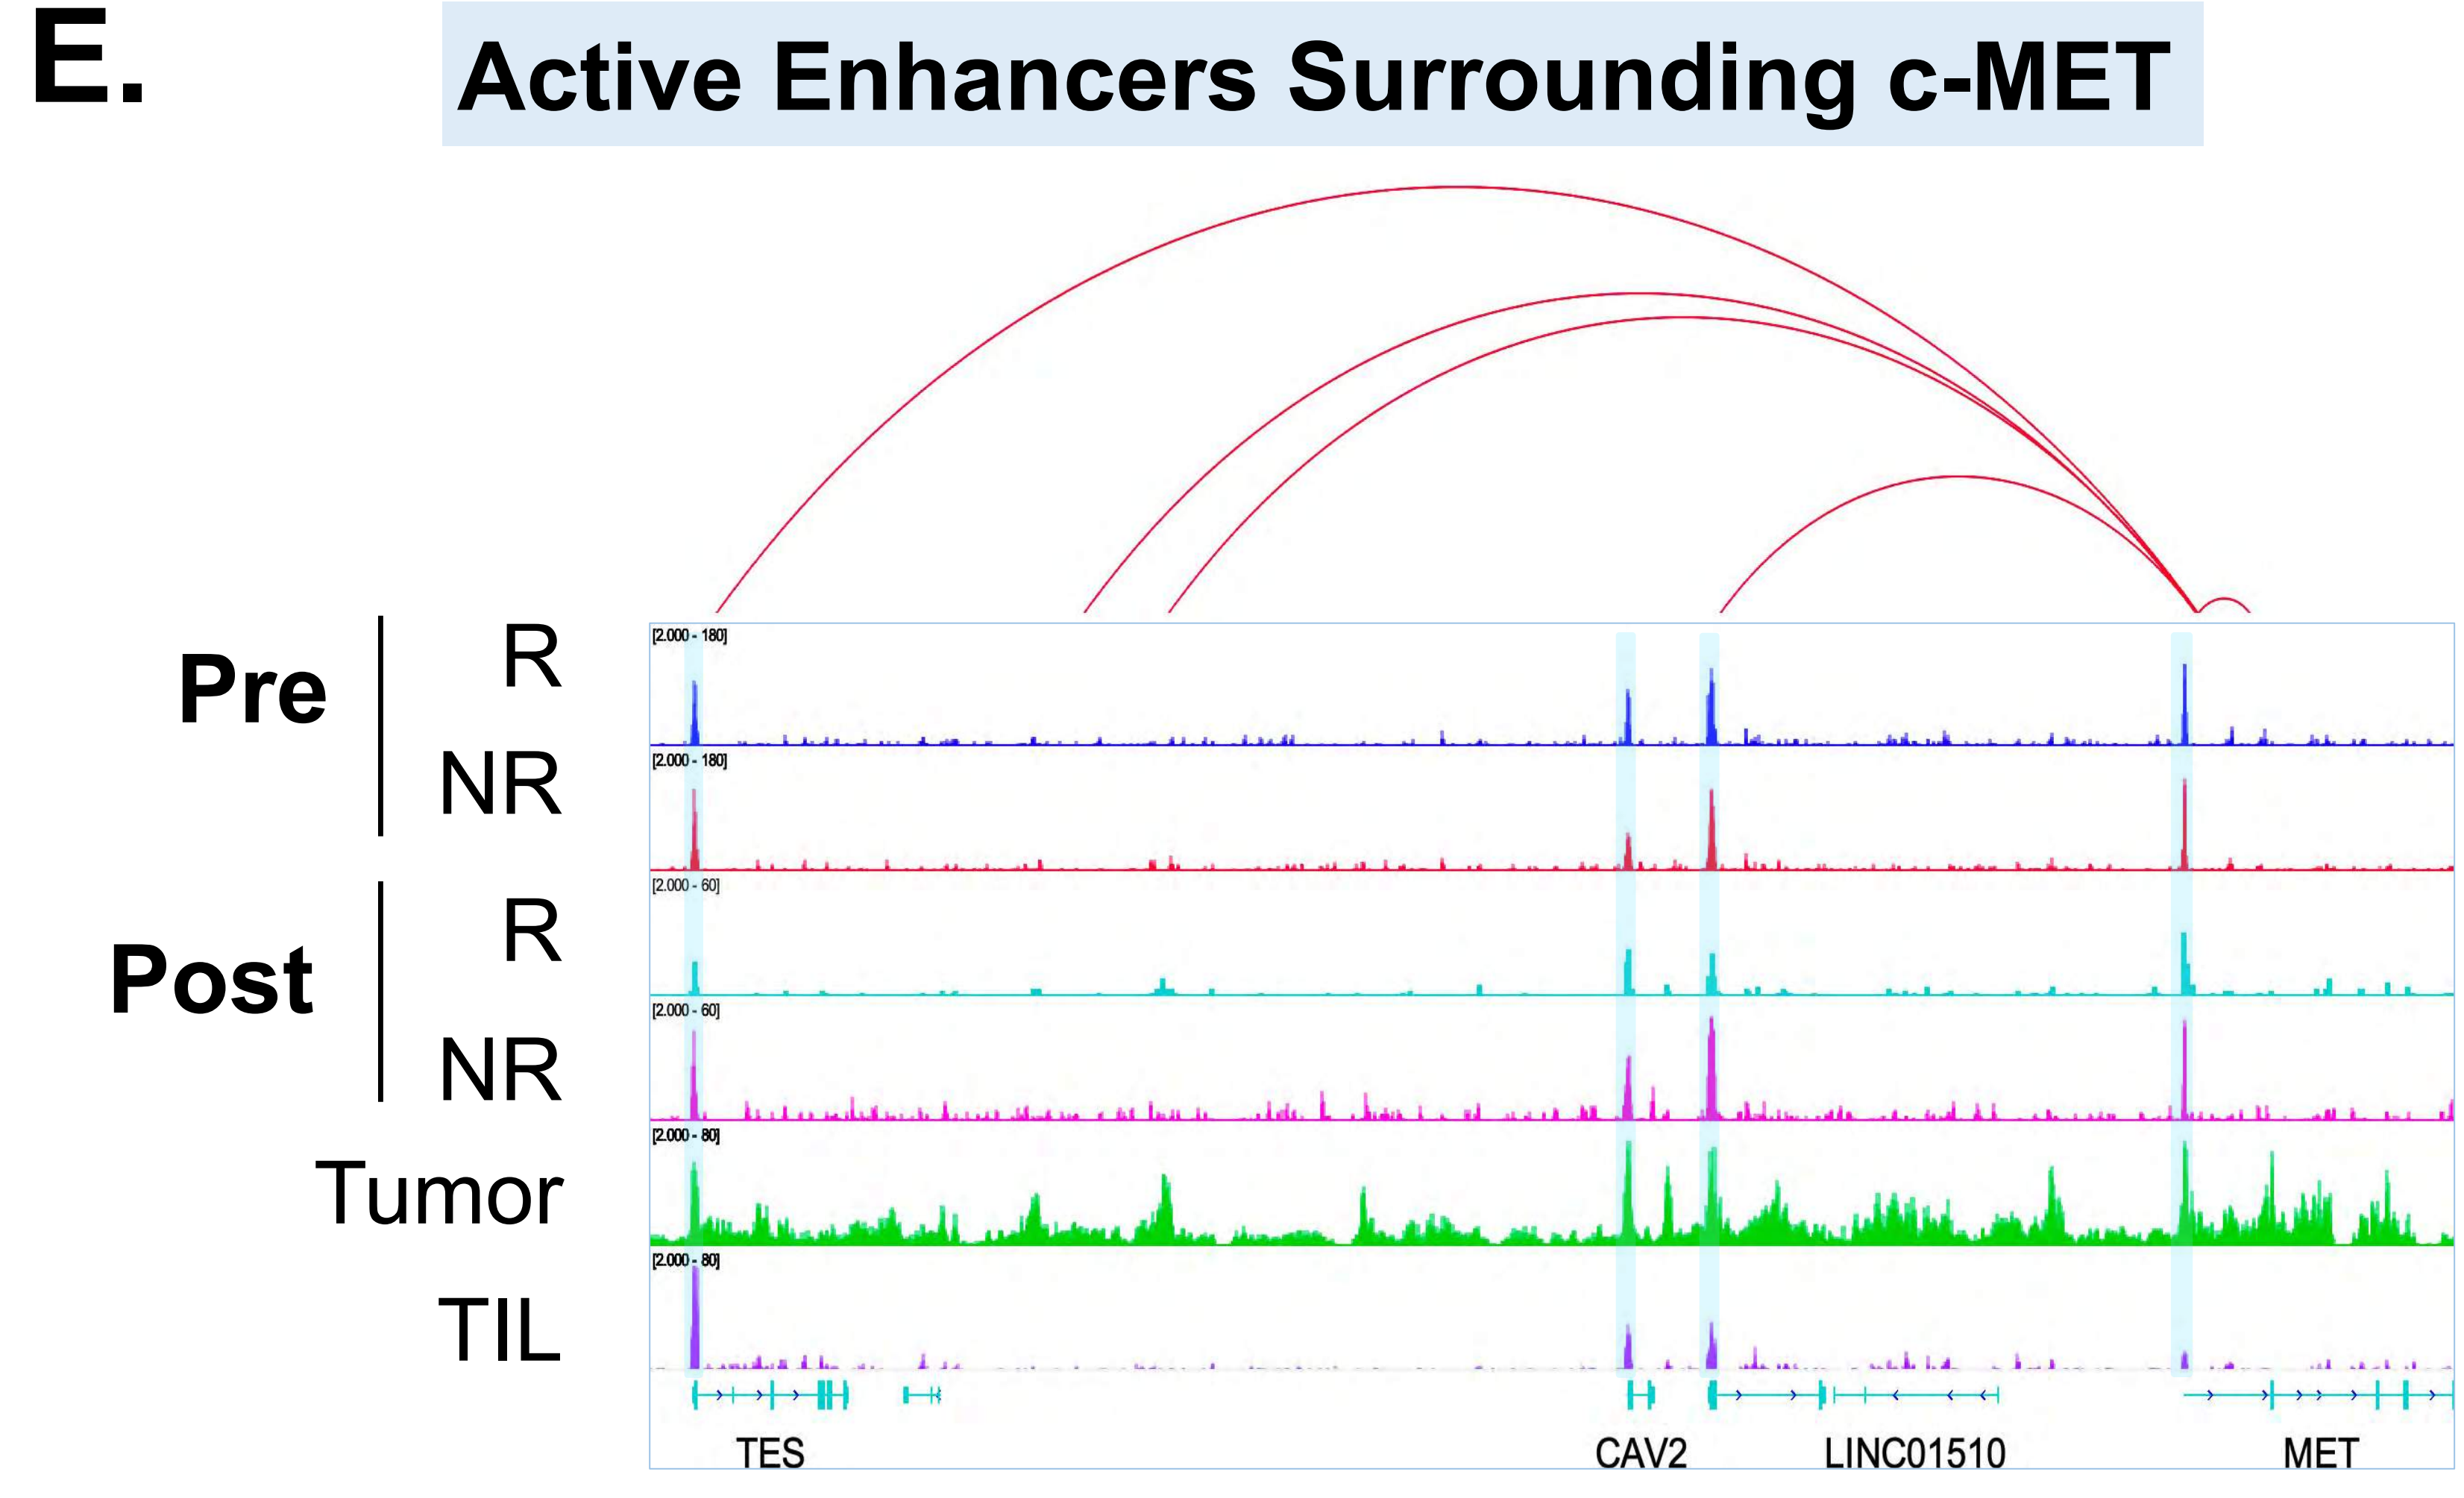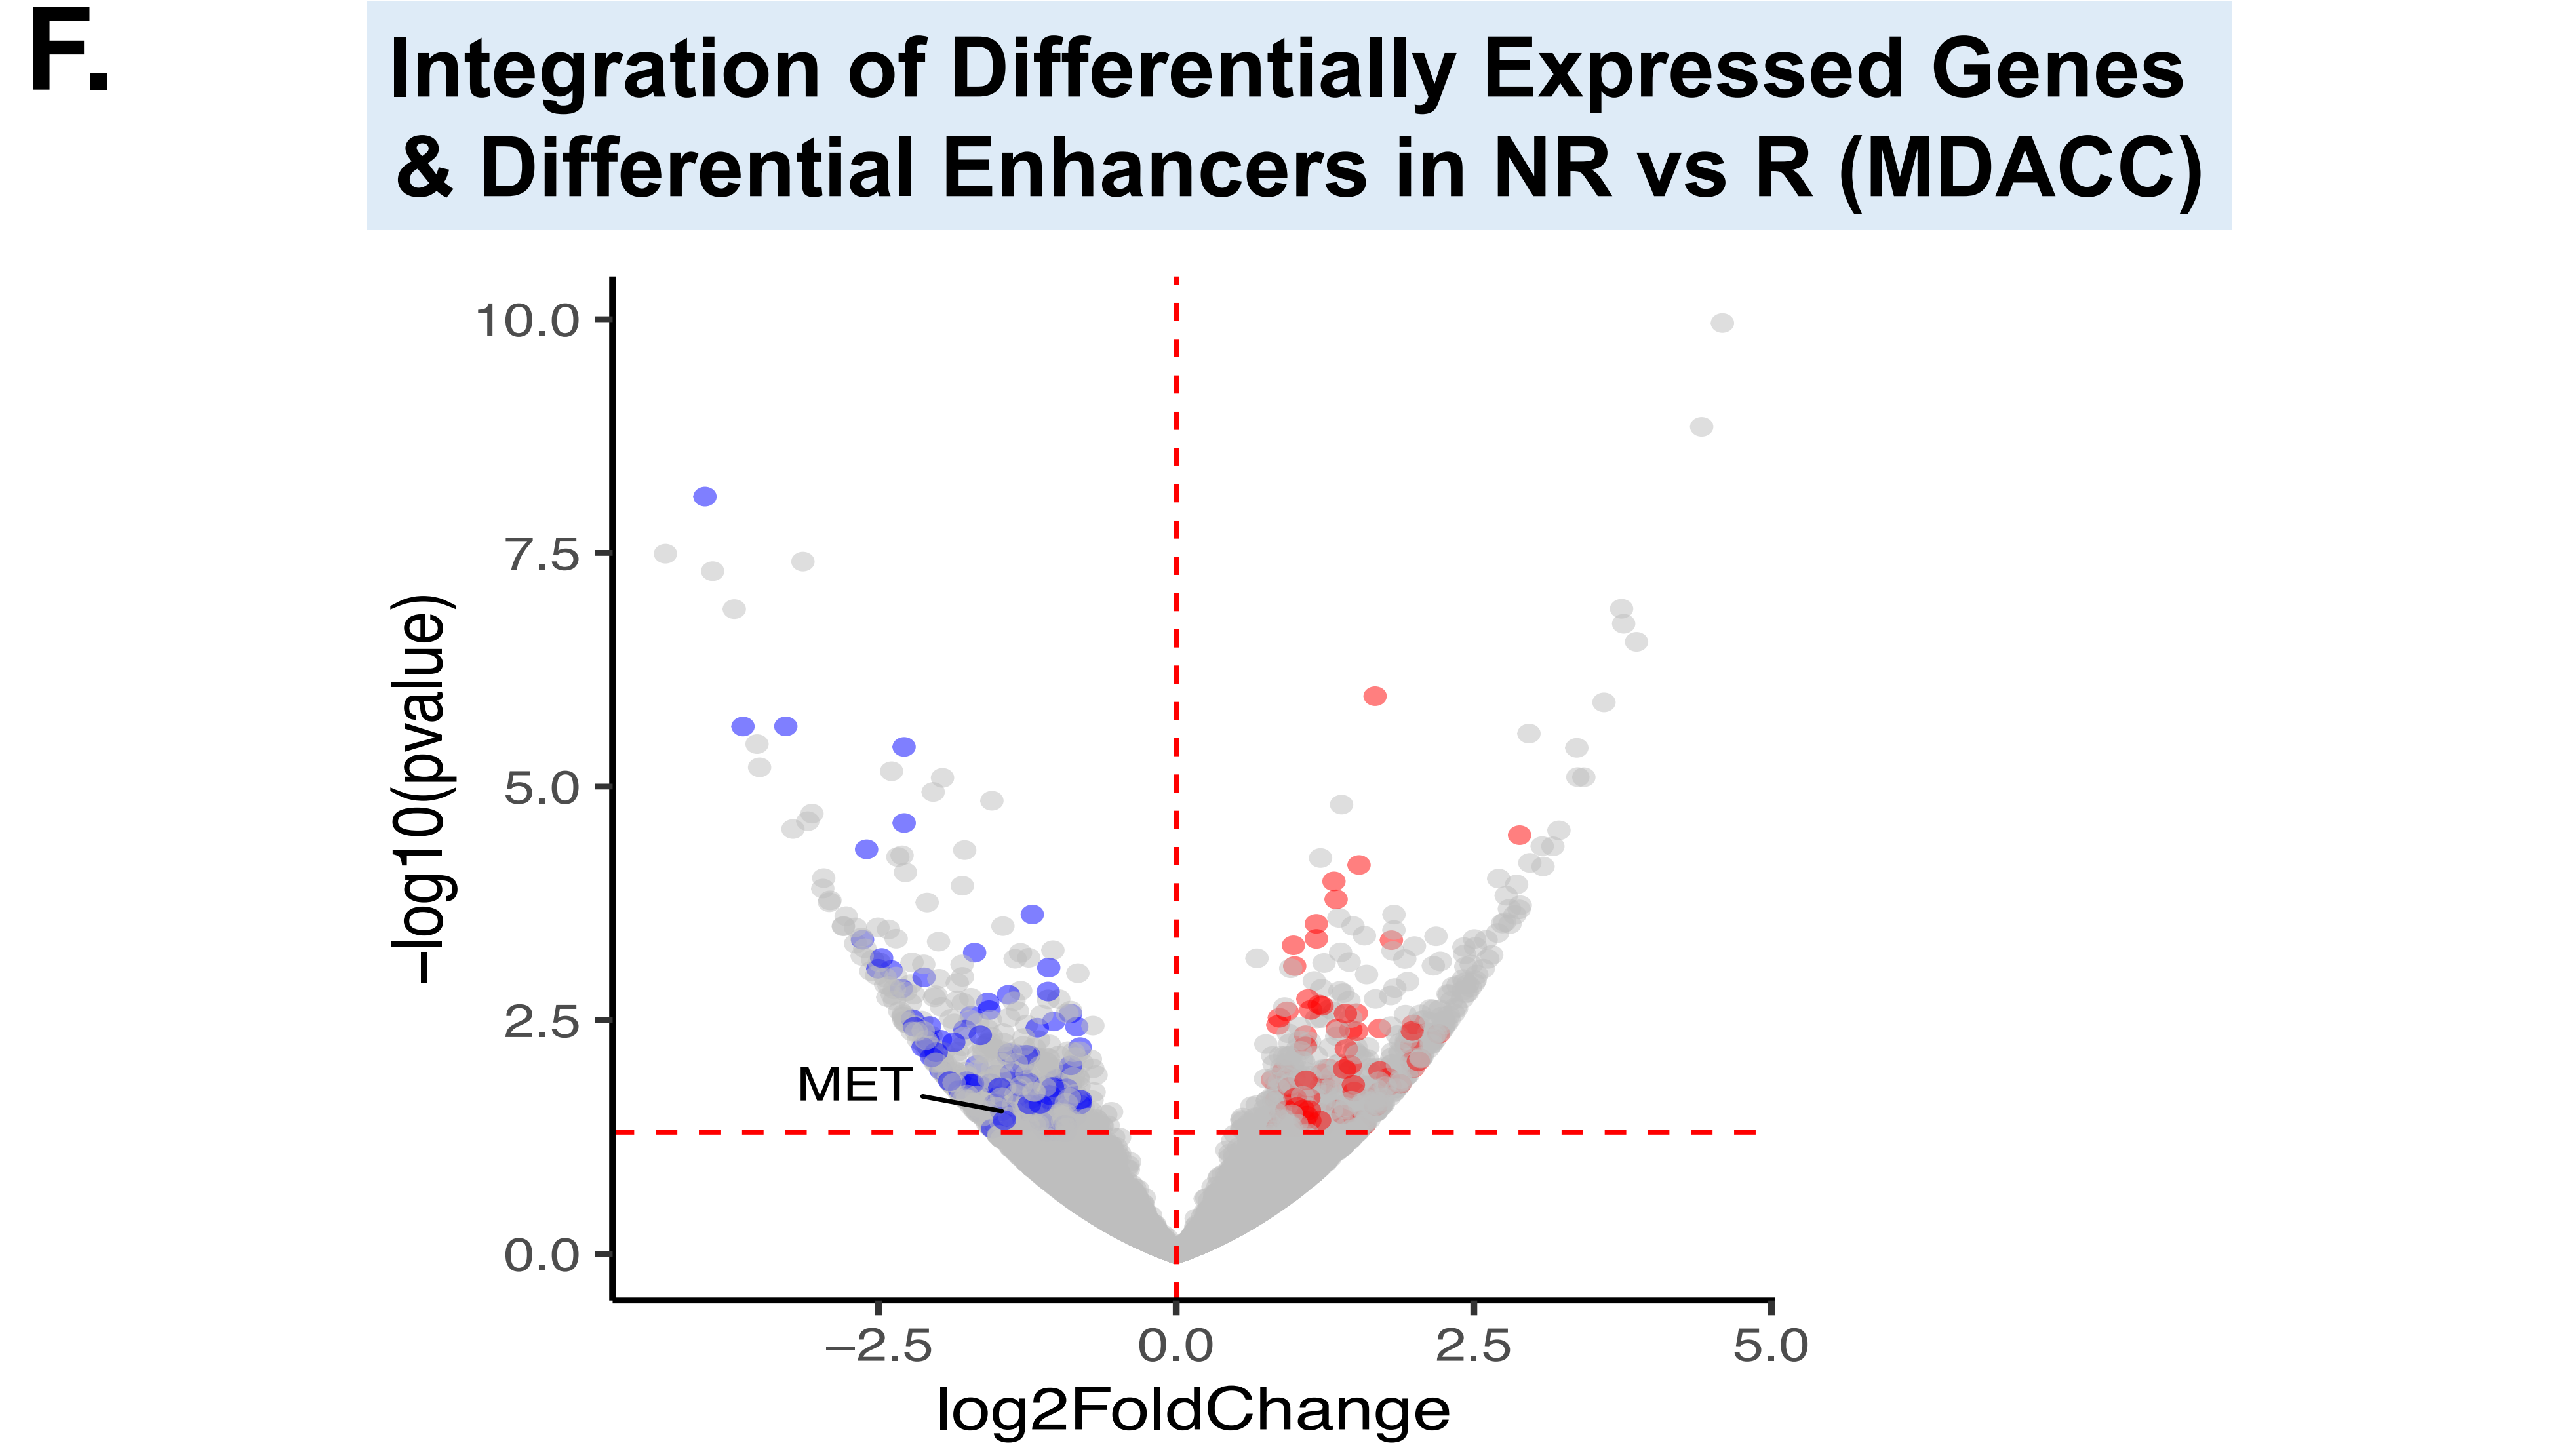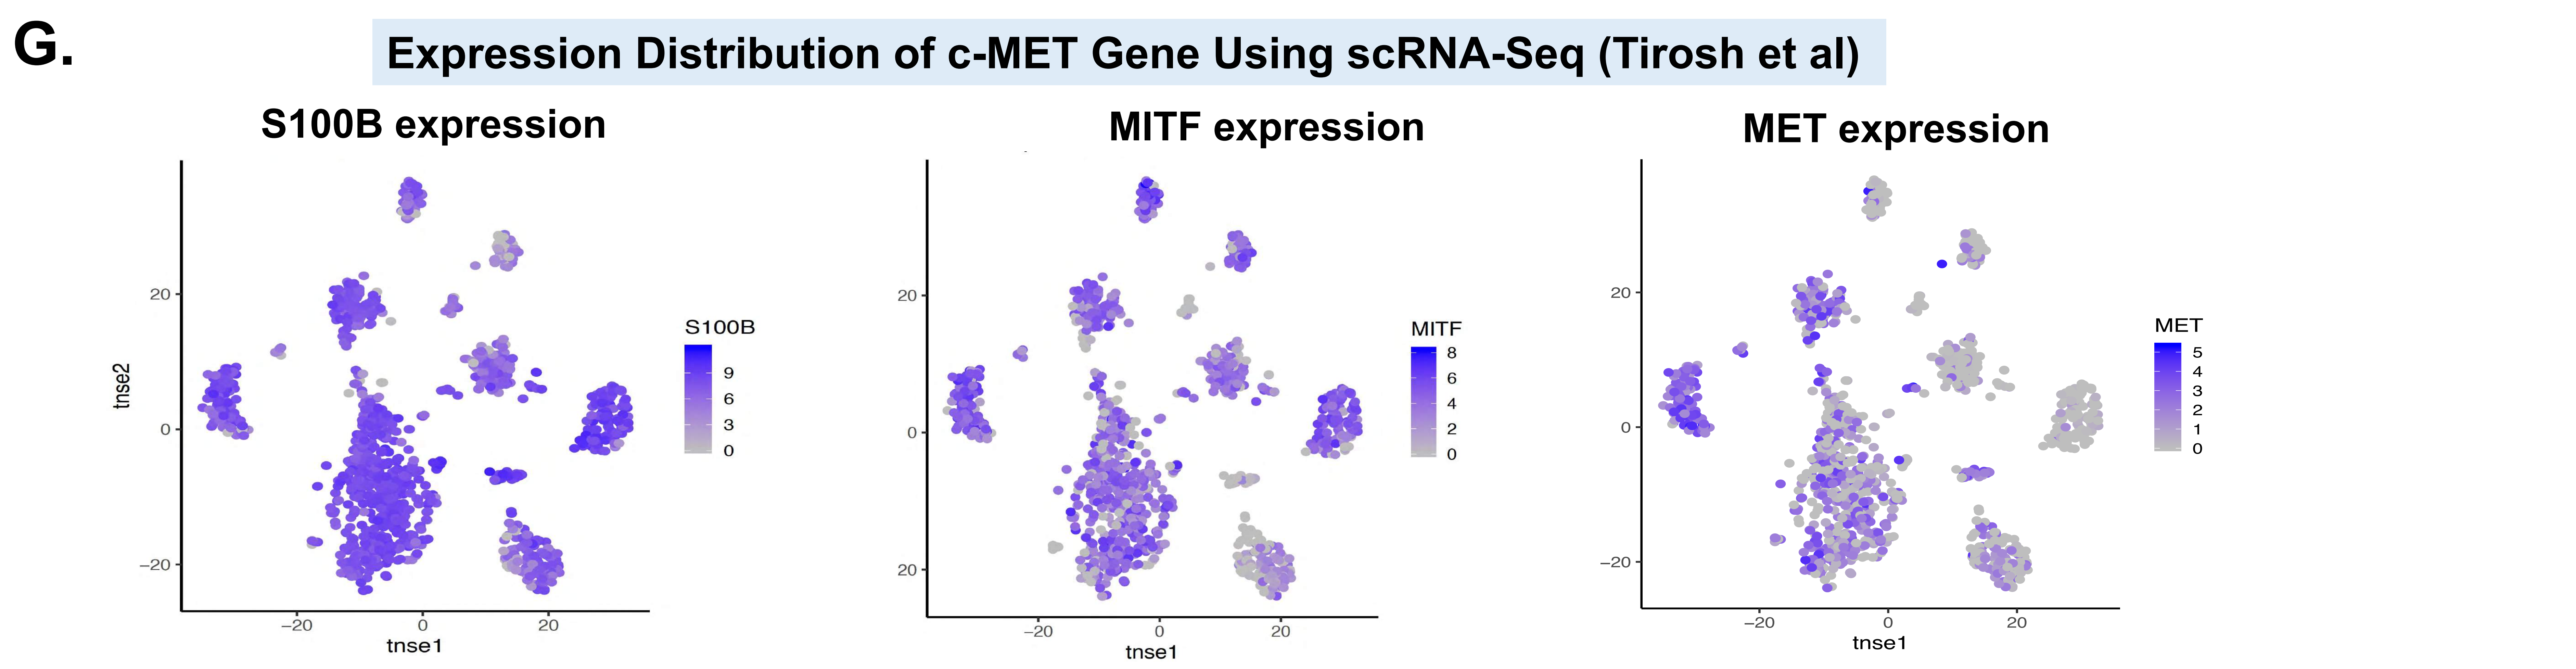

**A. Chromatin State Transition between Pre vs Post-treatment**

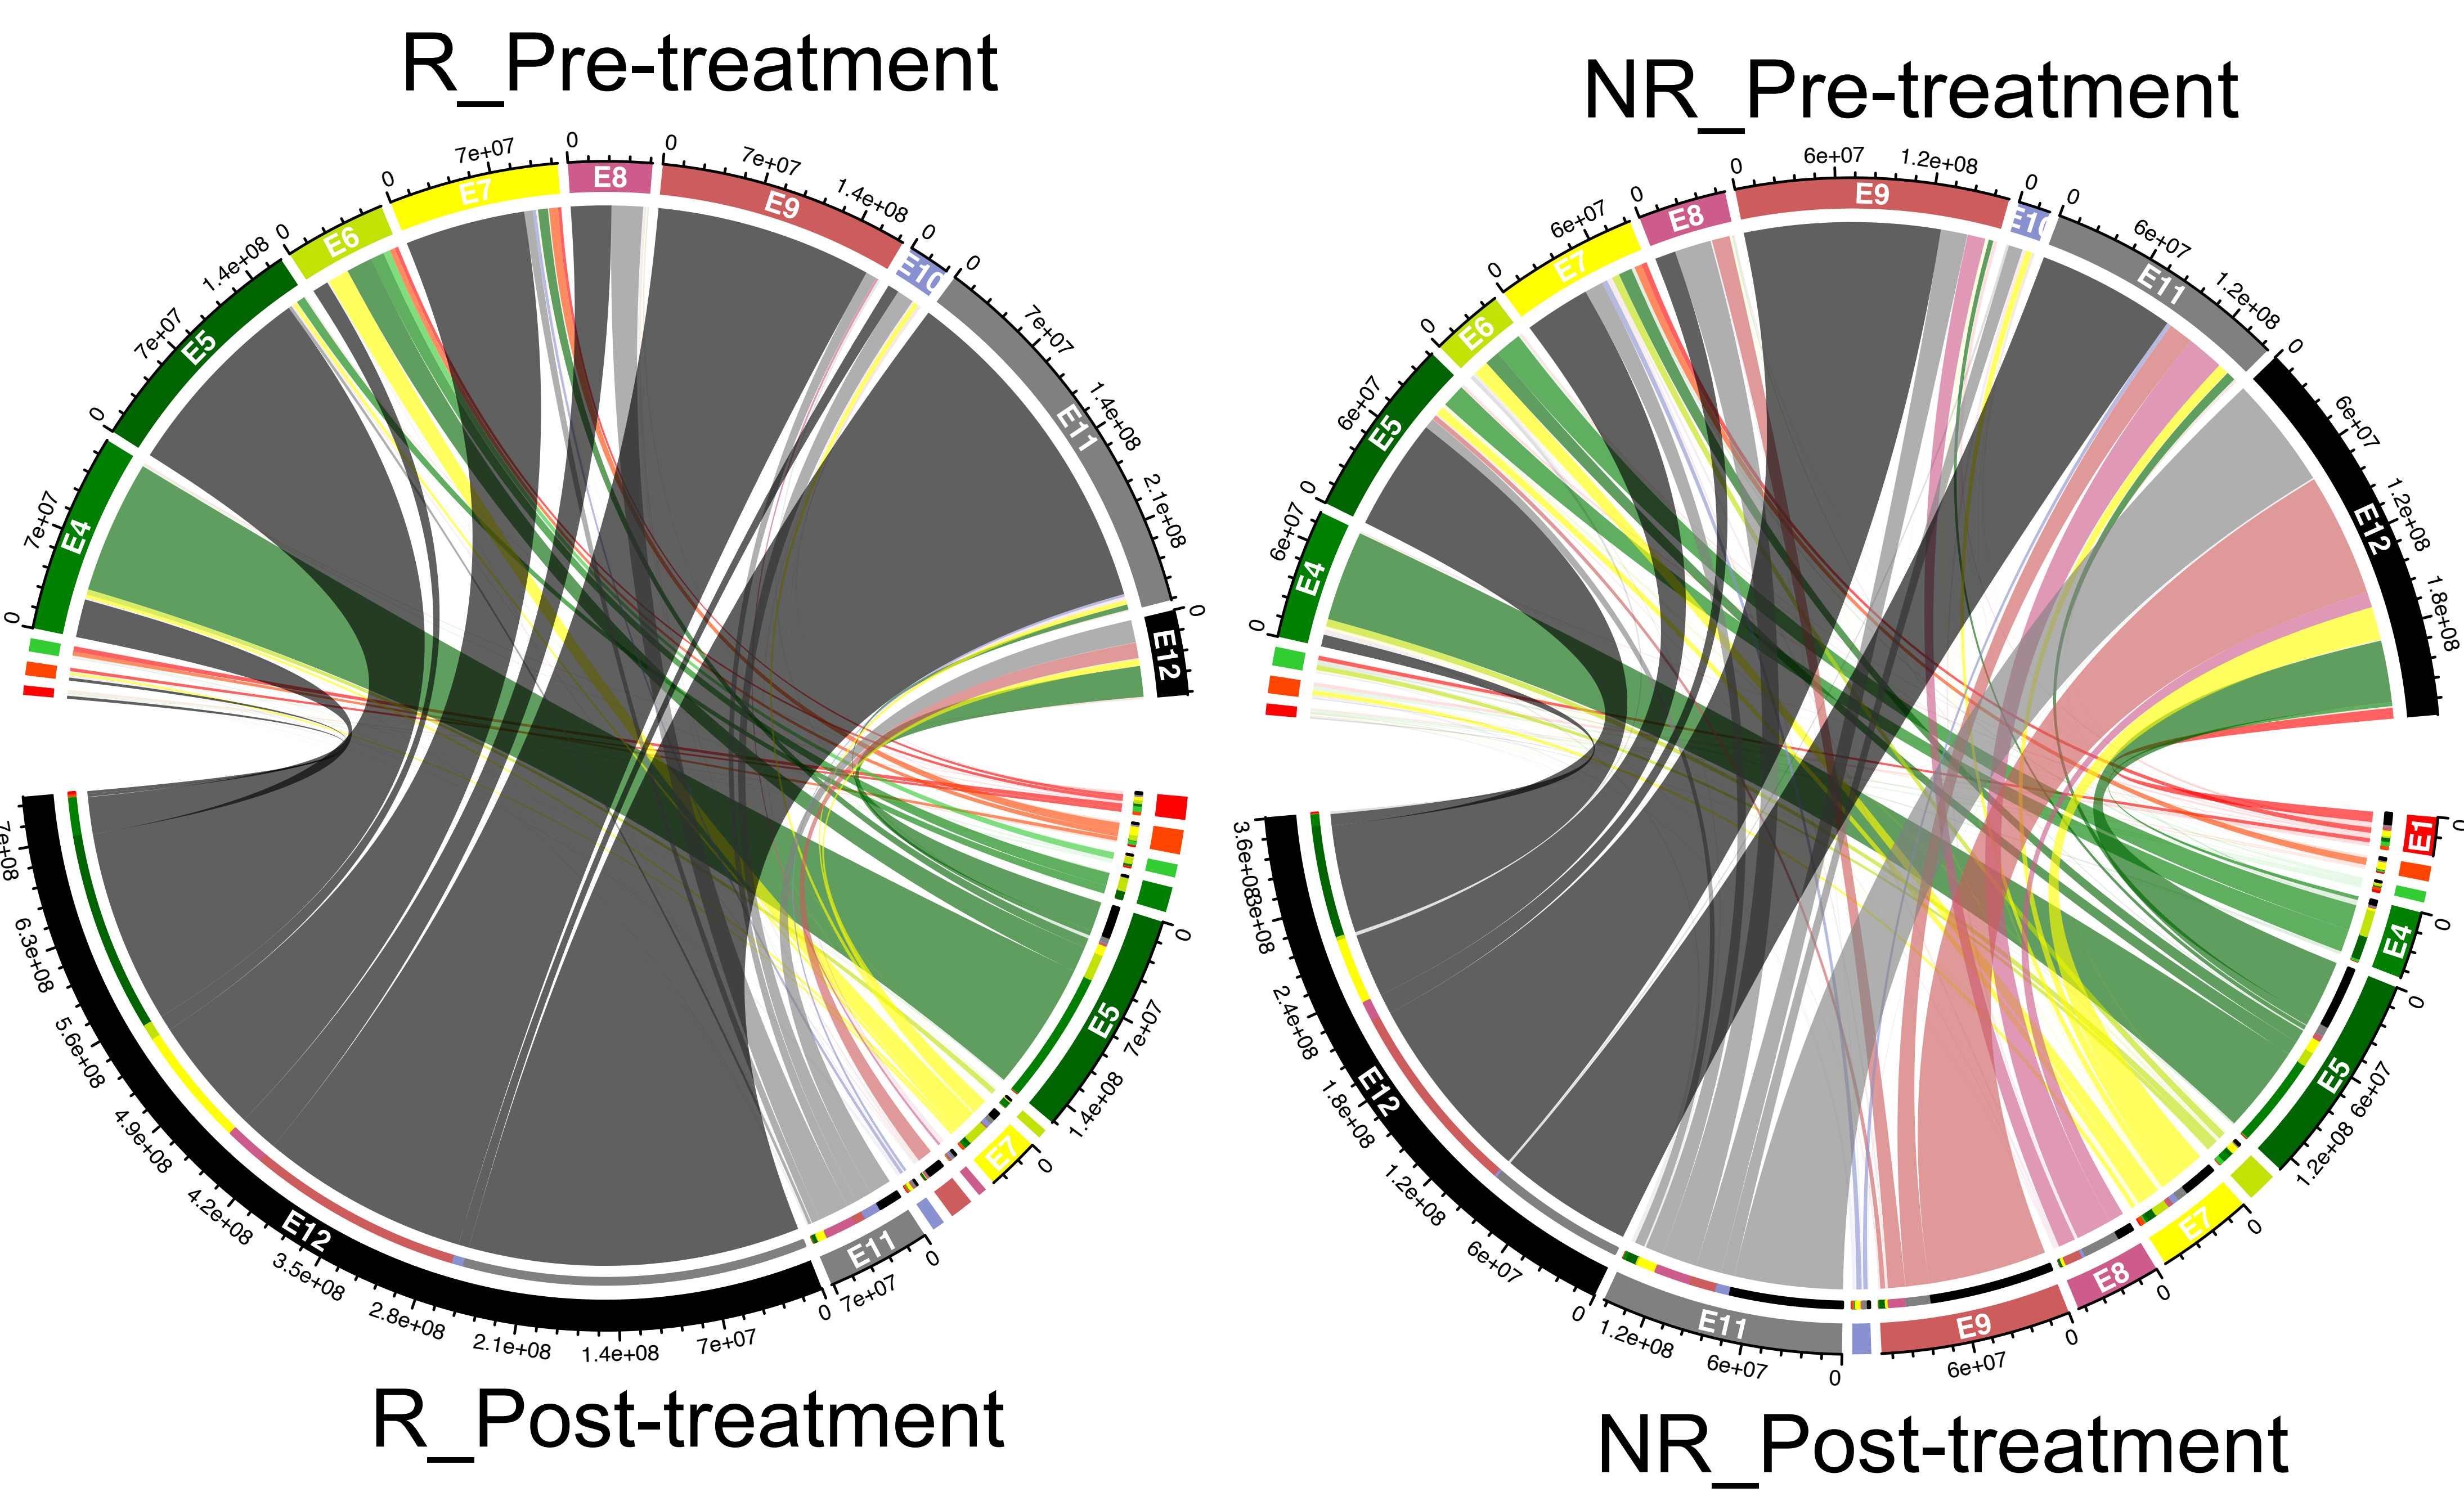

**B. Differential Regions (Pre vs Post-treatment)**

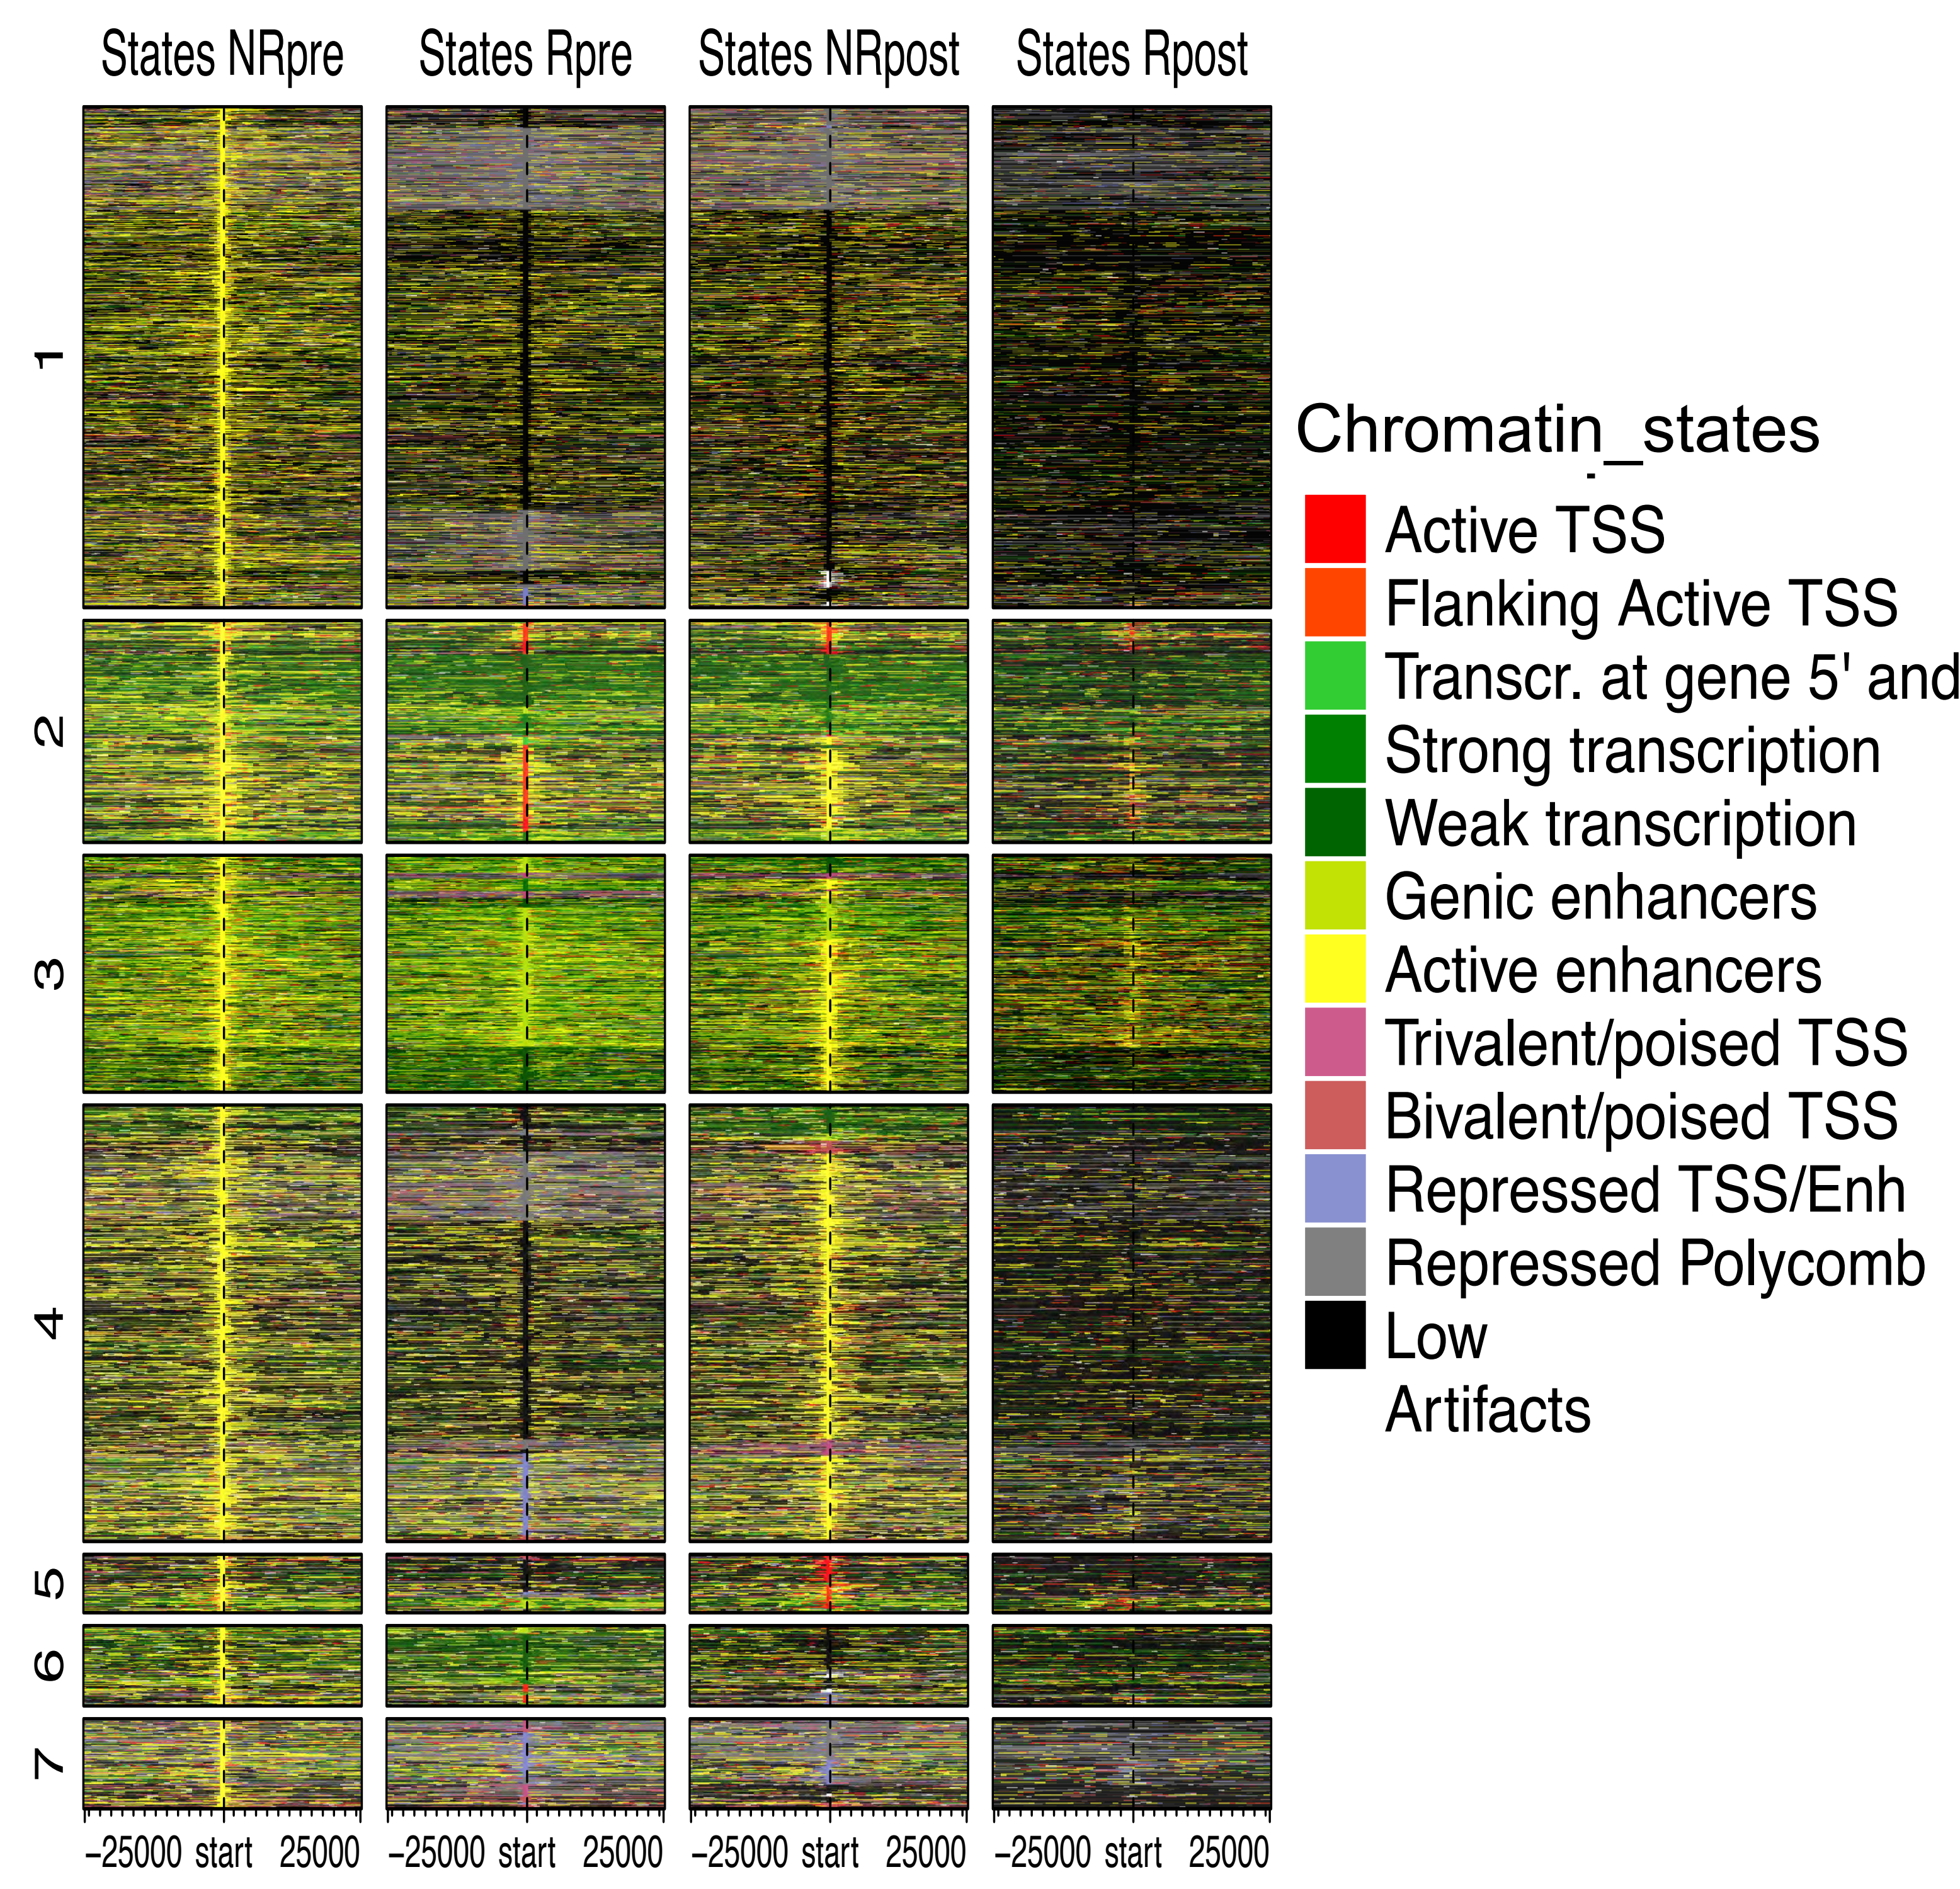

**C. Pathway Enrichment of NR-enriched Enhancers in Cluster 1 (Repressed by  $\alpha$ -PD1 Treatment)**

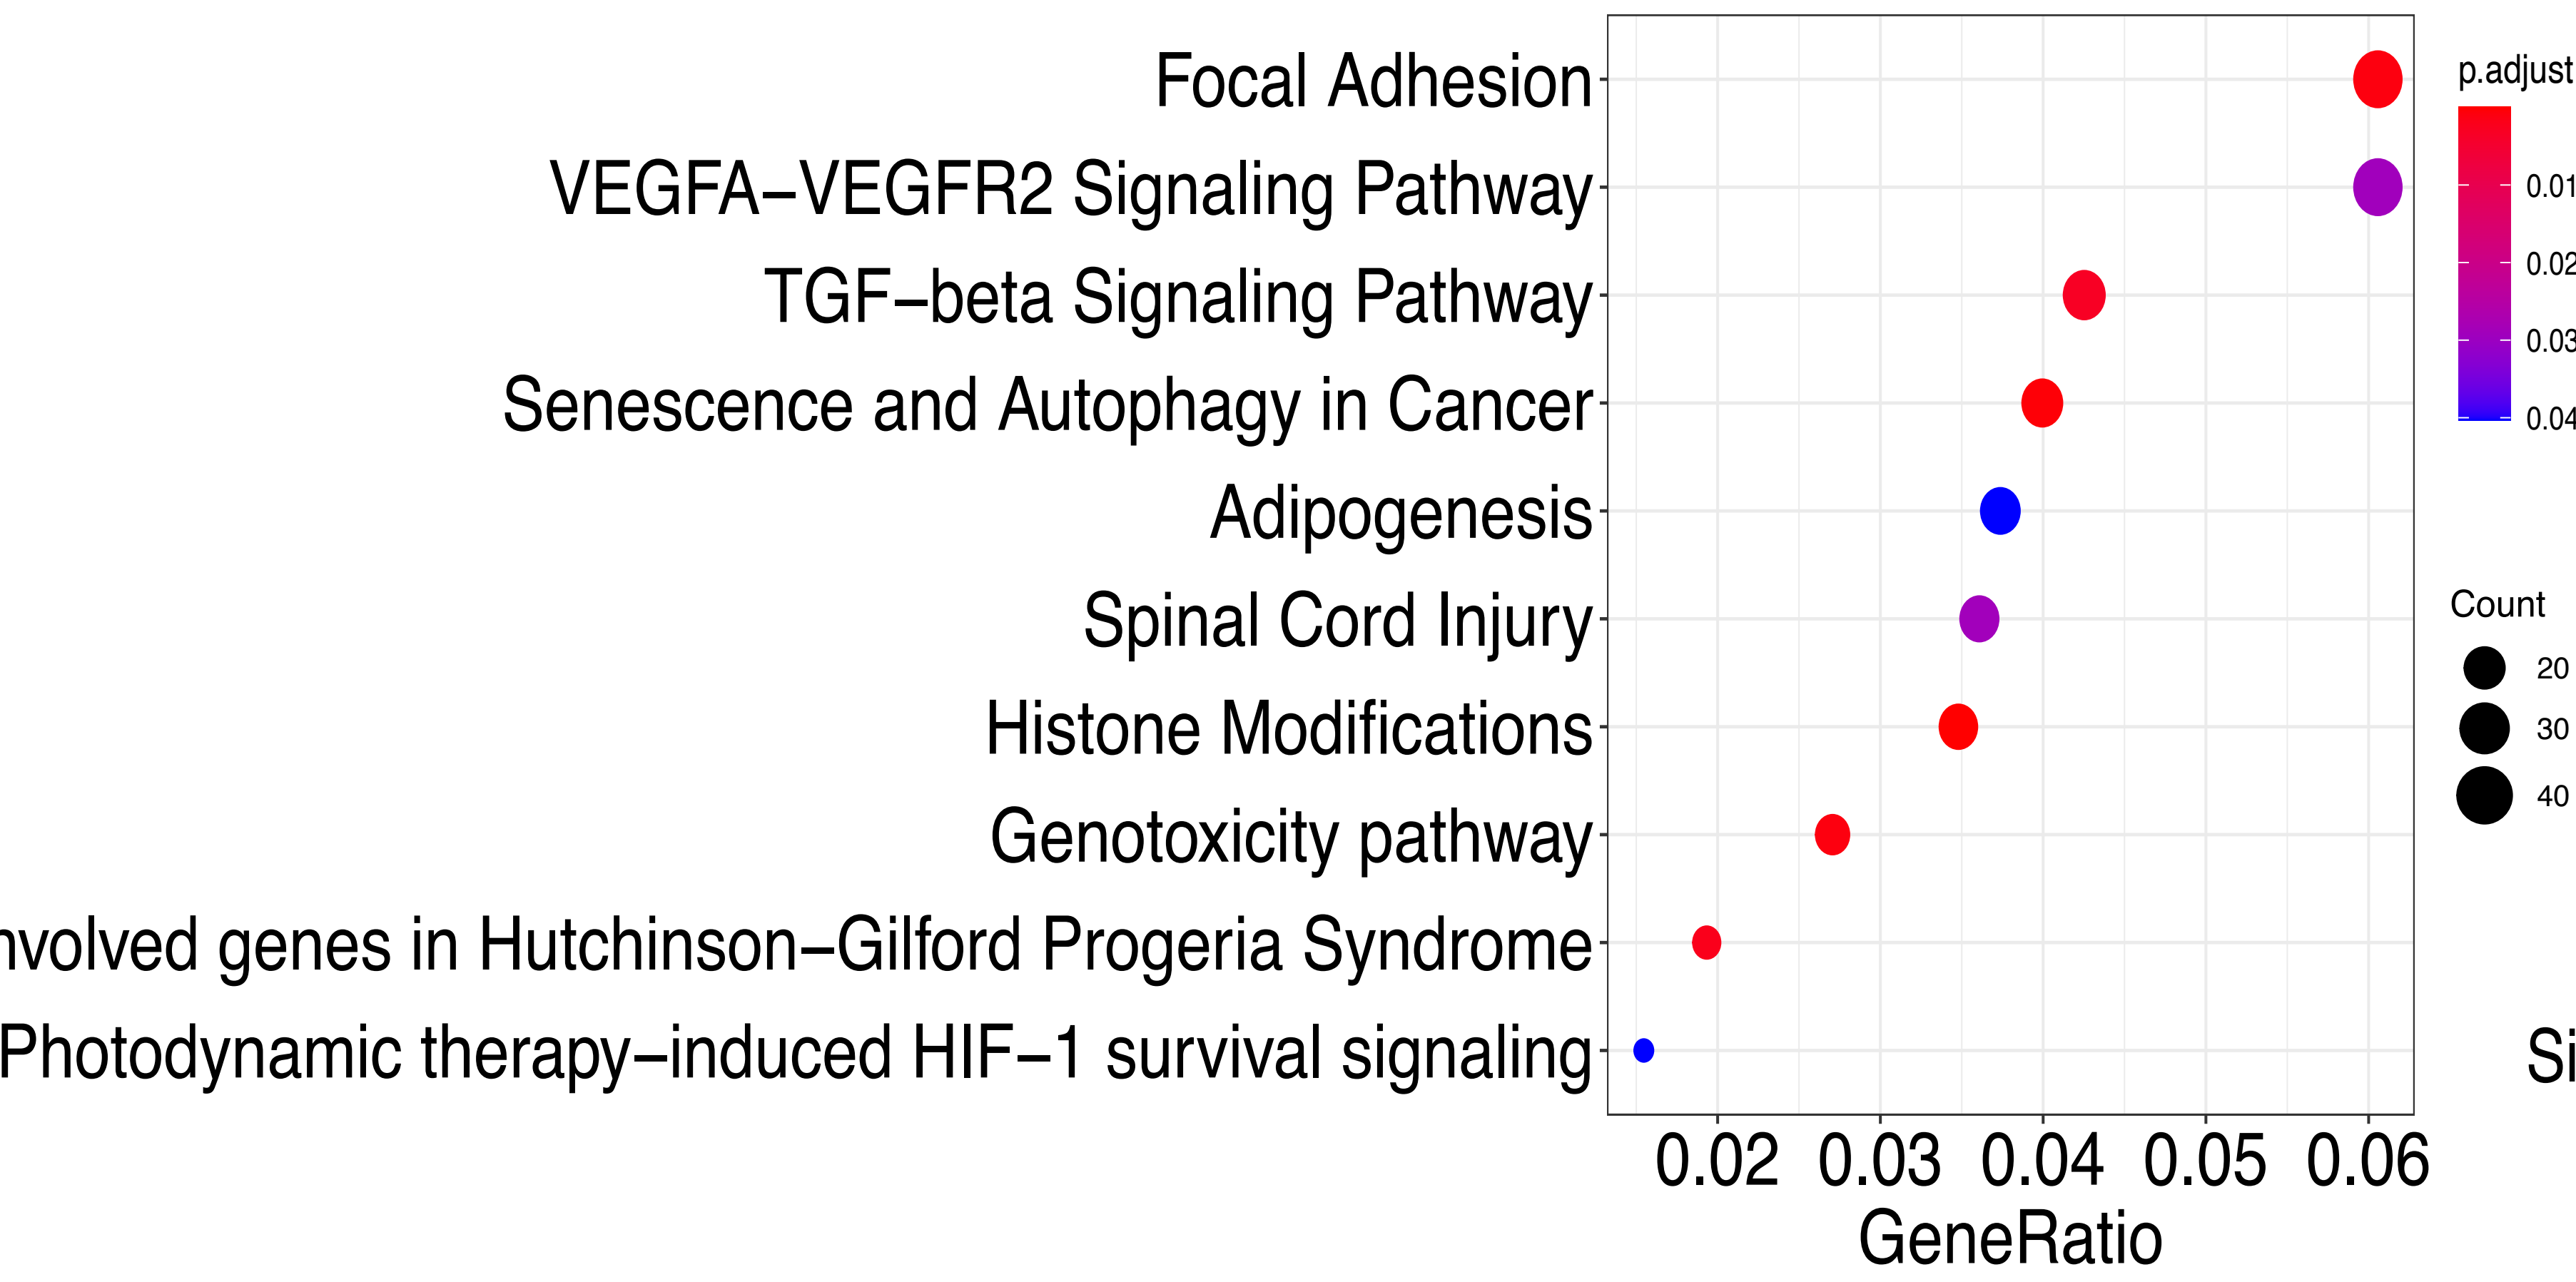

**D. Pathway Enrichment of NR-enriched Enhancers in Cluster 4 (Not affected by  $\alpha$ -PD1 Treatment)**

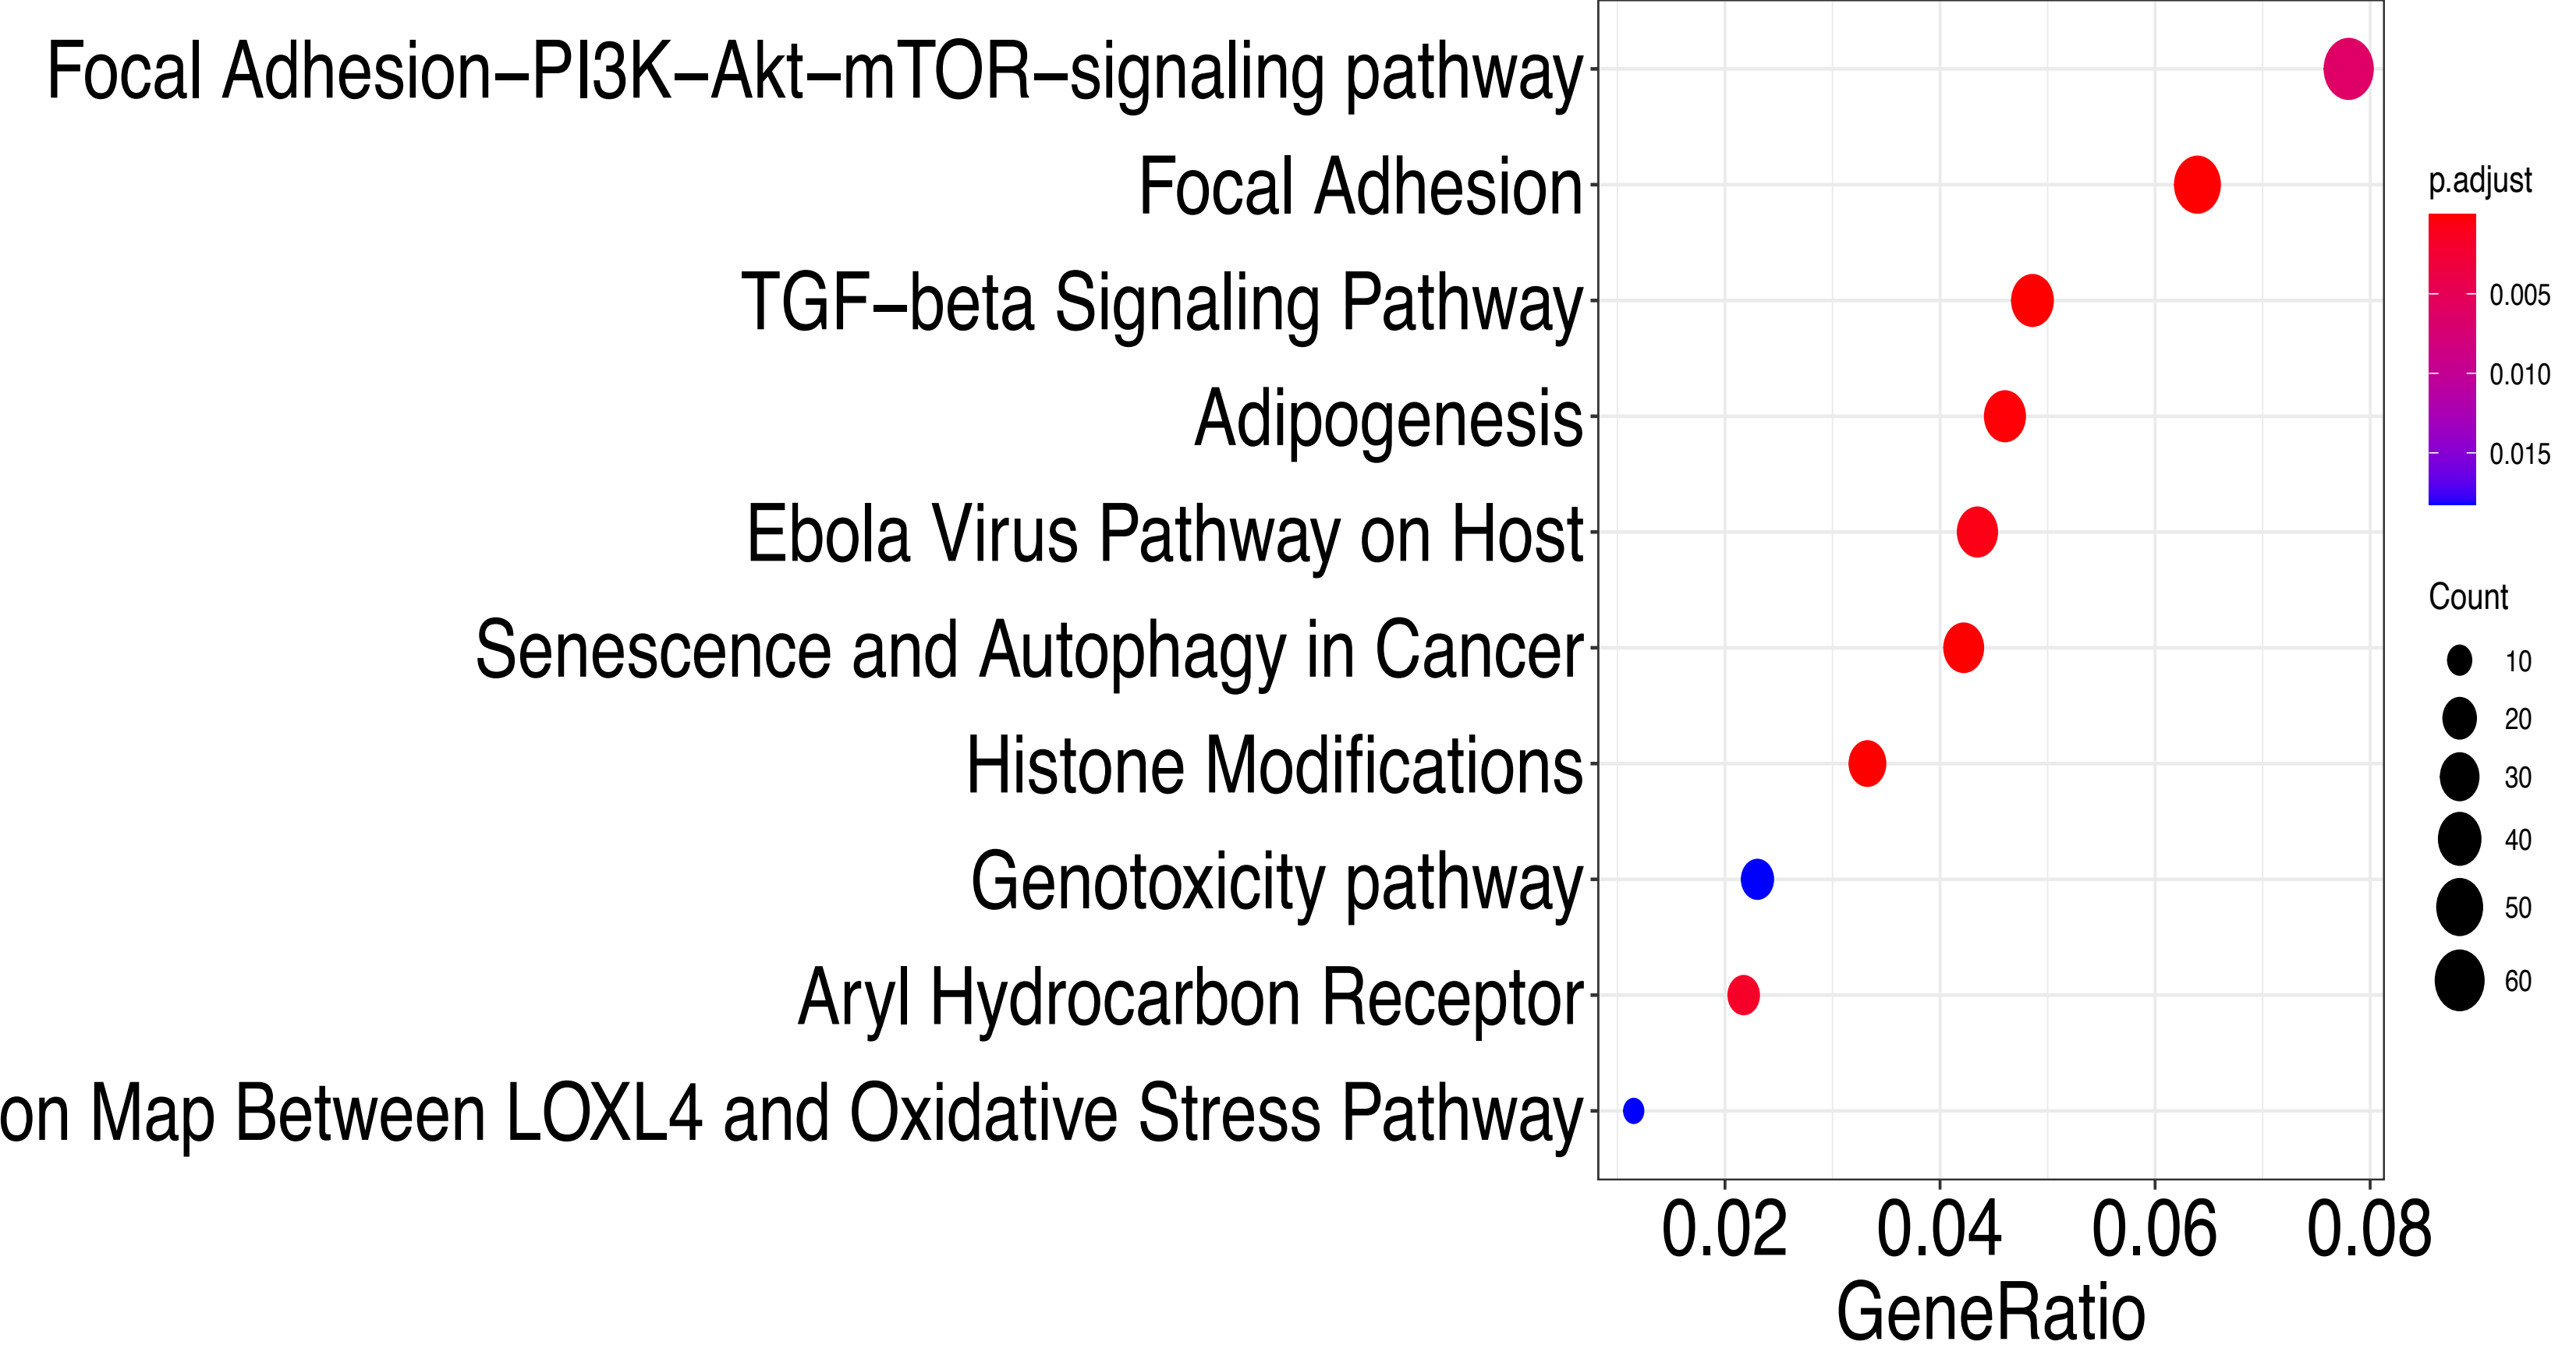

**E. Examples of Cluster 1 Enhancers - Repressed by  $\alpha$ -PD1 Treatment**

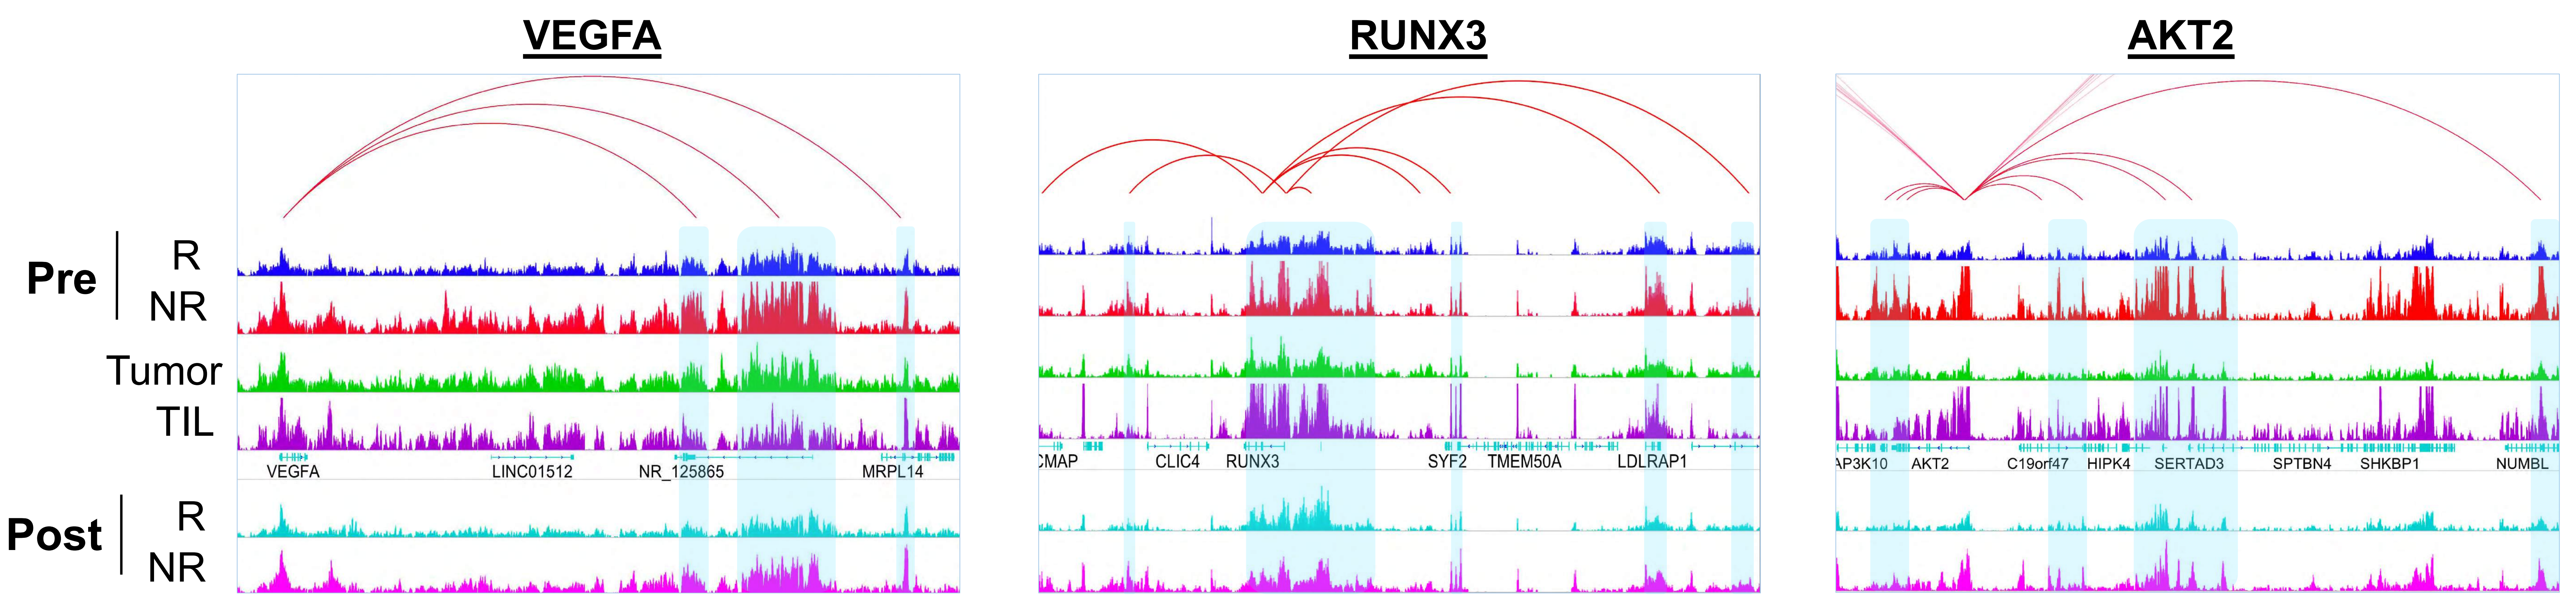

**F. Cluster 4 Enhancer Examples - Not affected by  $\alpha$ -PD1 Treatment**

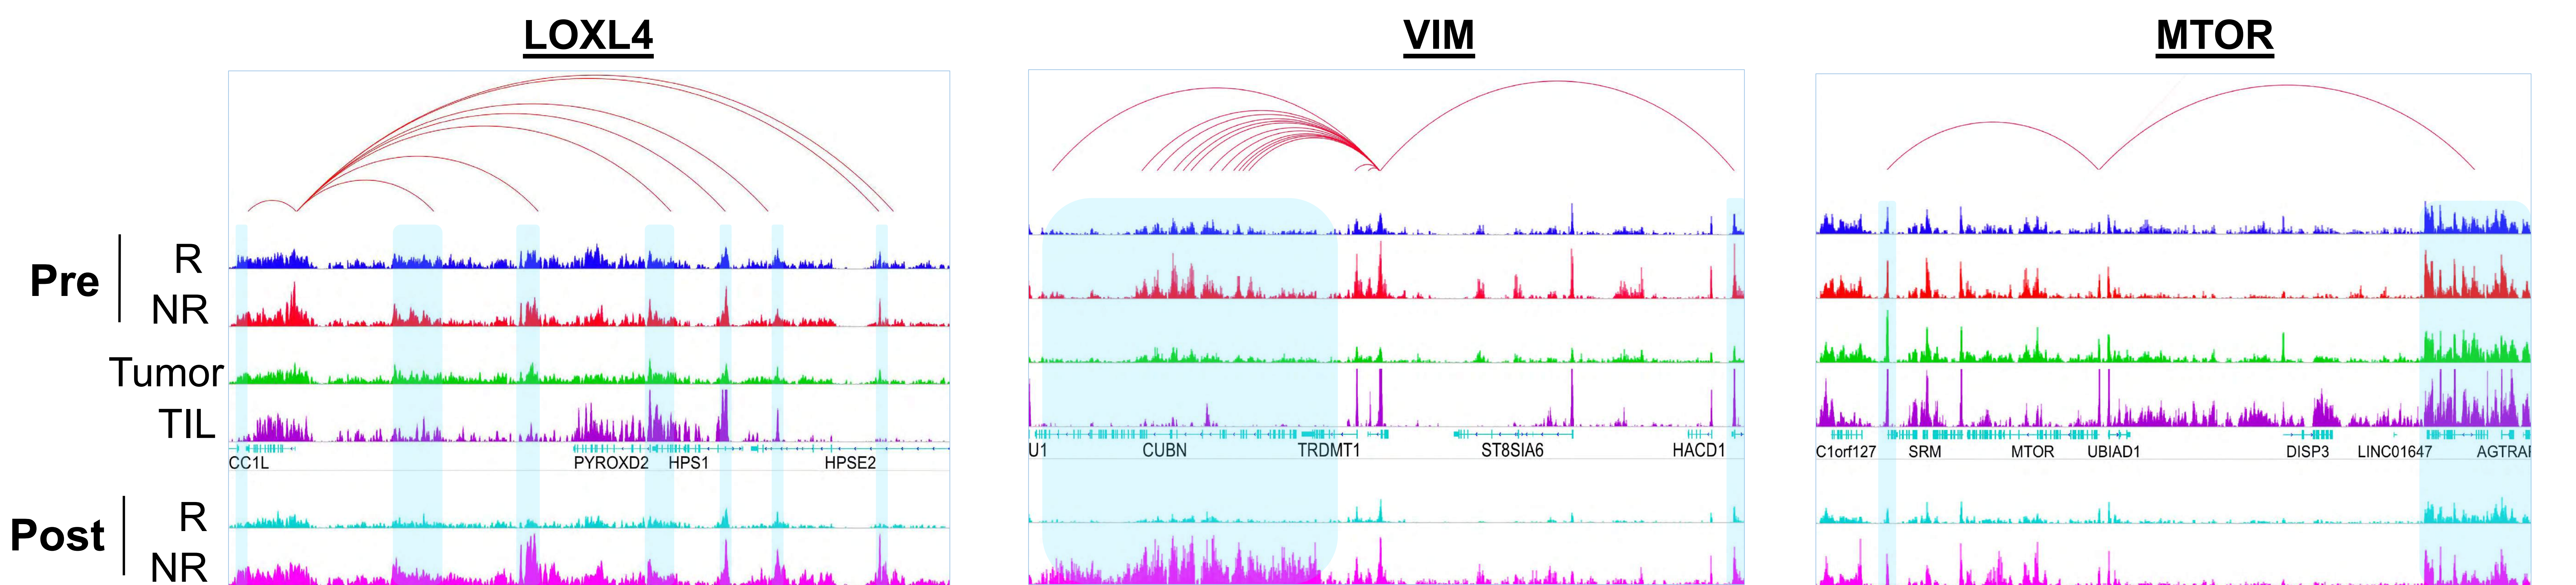

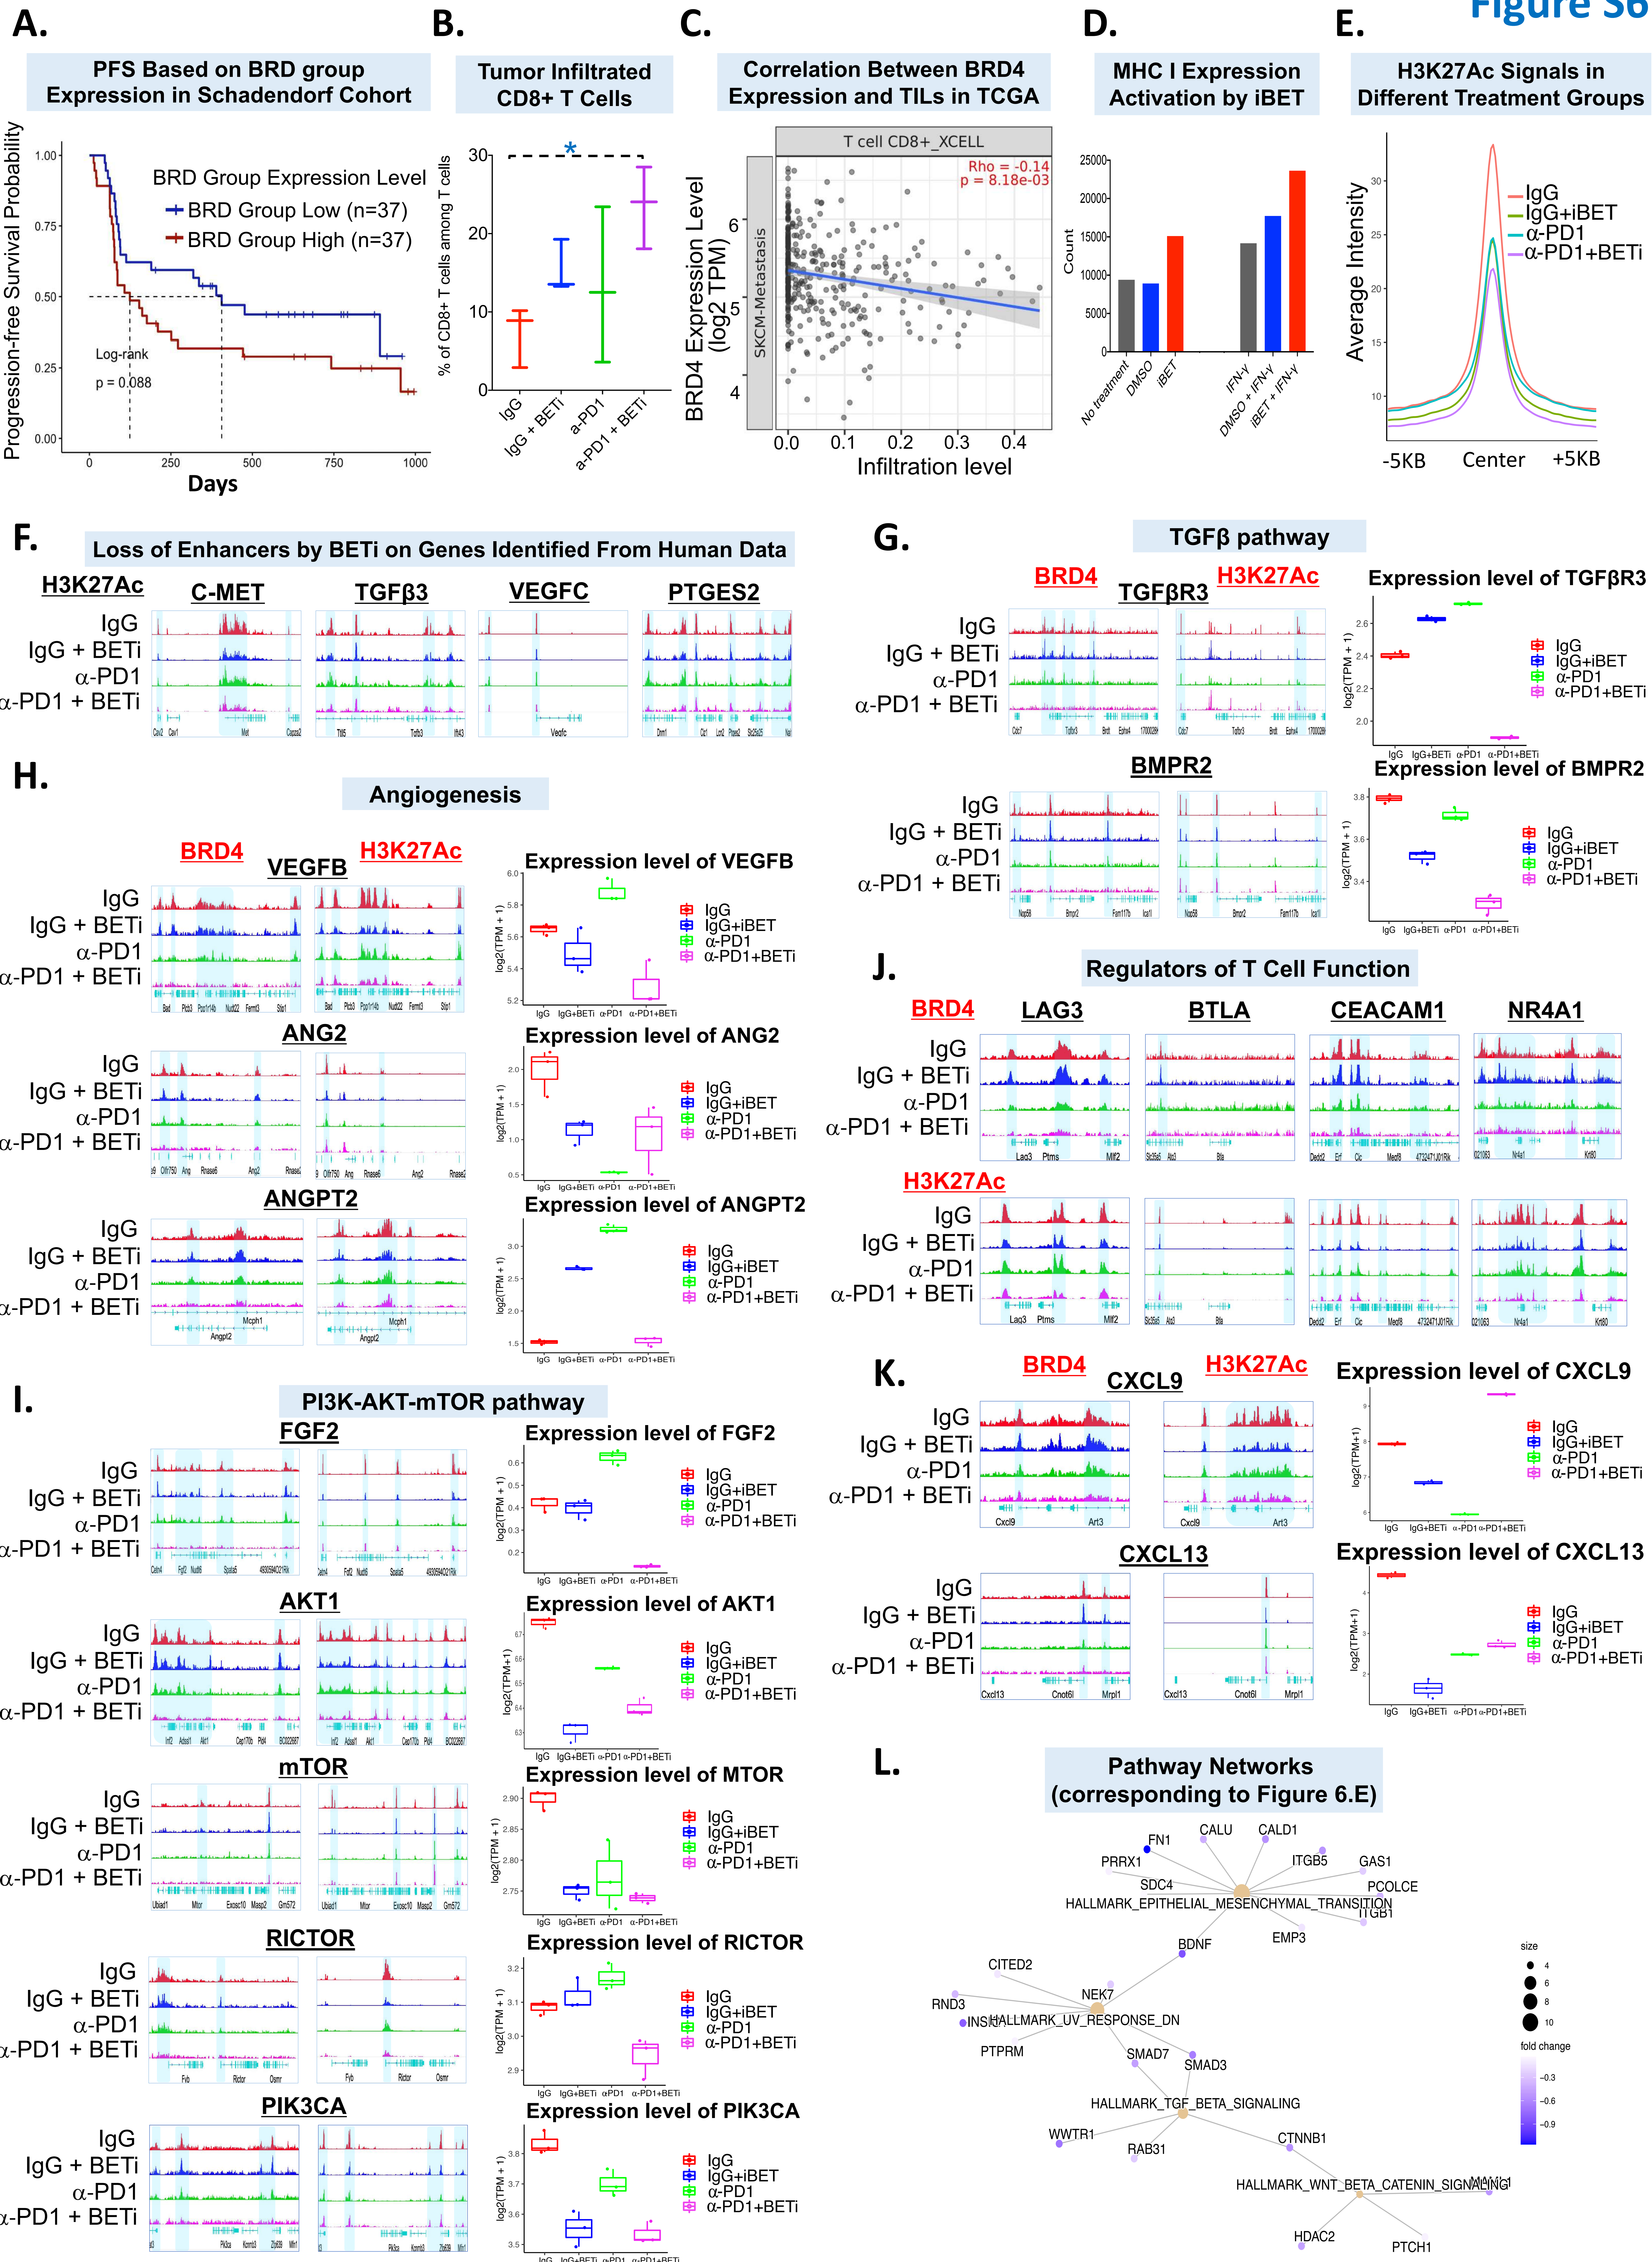

Source: https://www.biorxiv.org/content/10.1101/2022.08.31.506051v1.full.pdf
